# Supplementary material for: Cell type-specific control of secondary cell wall formation by Musashi-type translational regulators in Arabidopsis
Source: bioRxiv preprint, doi:10.1101/2023.03.20.532888, version 2 (2023-07-26)
Supplement: Supplementary file 4 [file 532888_file23.xls]

## Sheet: Proteomic dataset
MS-based label-free quantitative proteomic analysis of Col-0 (WT) and msil2/4 (mutant).
accession	description	gene name	mol weight (Da)	identified peptides	coverage (%)	quantified peptides	msil2/4 Vs Col-0		log2(abundances)
							log2(Fold Change)	limma p-value	Col R1	Col R2	Col R3	msil2/4 R1	msil2/4 R2	msil2/4 R3
JAL6_ARATH	sp|Q9SAV1|JAL6_ARATH Myrosinase-binding protein 2 OS=Arabidopsis thaliana OX=3702 GN=F-ATMBP PE=2 SV=1	F-ATMBP	68849	12	27.41	9	5.55893	1.54262e-05	19.1248	19.1117	19.0946	25.553	23.8699	24.5851			identified by MS1 cross-assignment
PER38_ARATH	sp|Q9LDA4|PER38_ARATH Peroxidase 38 OS=Arabidopsis thaliana OX=3702 GN=PER38 PE=3 SV=1	PER38	38086	17	46.53	13	5.10718	0.000178675	20.5909	21.0455	20.833	27.2323	25.7096	24.849			imputed value for partially missing value in the condition
LOX2_ARATH	sp|P38418|LOX2_ARATH Lipoxygenase 2, chloroplastic OS=Arabidopsis thaliana OX=3702 GN=LOX2 PE=1 SV=1	LOX2	102046	34	60.94	30	4.67817	0.00158328	24.456	23.1429	21.1309	28.0499	27.3405	27.3738			imputed values for values totally missing in the condition
JAL7_ARATH	sp|Q9SAV0|JAL7_ARATH Myrosinase-binding protein 1 OS=Arabidopsis thaliana OX=3702 GN=MBP1 PE=2 SV=1	MBP1	50167	16	56.71	12	4.26705	0.000622547	20.812	22.3781	21.2039	26.8493	24.8704	25.4754
6PGL5_ARATH	sp|Q8LEV7|6PGL5_ARATH Probable 6-phosphogluconolactonase 5 OS=Arabidopsis thaliana OX=3702 GN=PGL5 PE=2 SV=2	PGL5	28476	3	18.25	3	4.26159	0.00218098	19.1248	19.1117	19.0946	25.2106	22.9668	21.9385
BAM5_ARATH	sp|P25853|BAM5_ARATH Beta-amylase 5 OS=Arabidopsis thaliana OX=3702 GN=BAM5 PE=2 SV=1	BAM5	56063	6	18.67	5	4.08162	0.00153849	19.1248	19.1117	19.0946	24.6378	23.2775	21.6606
ACPM2_ARATH	sp|O80800|ACPM2_ARATH Acyl carrier protein 2, mitochondrial OS=Arabidopsis thaliana OX=3702 GN=MTACP2 PE=1 SV=1	MTACP2	14167	1	9.52	1	3.79372	4.77274e-08	19.1248	19.1117	19.0946	22.9946	22.8245	22.8932			Significantly enriched in msil2/4
AOC1_ARATH	sp|Q9LS03|AOC1_ARATH Allene oxide cyclase 1, chloroplastic OS=Arabidopsis thaliana OX=3702 GN=AOC1 PE=1 SV=1	AOC1	27802	4	14.17	2	3.63664	2.95505e-05	19.1248	19.1117	19.0946	23.1654	23.0242	22.0514			Significantly enriched in Col-0 (WT)
GPPL3_ARATH	sp|Q8RYE9|GPPL3_ARATH Haloacid dehalogenase-like hydrolase domain-containing protein At2g33255 OS=Arabidopsis thaliana OX=3702 GN=At2g33255 PE=1 SV=1	At2g33255	27497	2	9.8	1	3.62625	0.000335408	19.1248	19.1117	19.0946	23.8567	22.2645	22.0887
GRS14_ARATH	sp|Q84Y95|GRS14_ARATH Monothiol glutaredoxin-S14, chloroplastic OS=Arabidopsis thaliana OX=3702 GN=GRXS14 PE=1 SV=2	GRXS14	19309	2	16.18	1	3.57562	2.13158e-06	19.1248	19.1117	19.0946	23.0689	22.419	22.5701
GDL19_ARATH	sp|Q8W4H8|GDL19_ARATH Inactive GDSL esterase/lipase-like protein 23 OS=Arabidopsis thaliana OX=3702 GN=GLL23 PE=1 SV=1	GLL23	43143	7	30.83	3	3.57487	0.000418026	19.1248	19.1117	19.0946	23.0756	21.5466	23.4335
Q42001_ARATH	tr|Q42001|Q42001_ARATH Ubiquitin (Fragment) OS=Arabidopsis thaliana OX=3702 PE=2 SV=1		5918	3	46.3	1	3.40663	3.70525e-07	19.1248	19.1117	19.0946	22.4043	22.7396	22.4071
VSP1_ARATH	sp|O49195|VSP1_ARATH Vegetative storage protein 1 OS=Arabidopsis thaliana OX=3702 GN=VSP1 PE=1 SV=2	VSP1	30262	4	17.41	4	3.40013	2.35294e-05	20.8979	21.3432	21.031	25.0525	24.1955	24.2246
A0A178VXJ9_ARATH	tr|A0A178VXJ9|A0A178VXJ9_ARATH Uncharacterized protein OS=Arabidopsis thaliana OX=3702 GN=AXX17_At2g39080 PE=4 SV=1	AXX17_At2g39080	40400	11	43.24	11	3.39987	0.00197907	24.1497	23.1095	21.7769	27.0119	26.2268	25.9969
GDL18_ARATH	sp|Q1H583|GDL18_ARATH GDSL esterase/lipase 22 OS=Arabidopsis thaliana OX=3702 GN=GLL22 PE=1 SV=1	GLL22	43194	11	38.36	10	3.3857	0.000129533	23.0285	21.9888	23.343	26.4598	25.9985	26.0592
LPP3_ARATH	sp|Q8LFD1|LPP3_ARATH Putative lipid phosphate phosphatase 3, chloroplastic OS=Arabidopsis thaliana OX=3702 GN=LPP3 PE=2 SV=1	LPP3	40775	1	4.12	1	3.34493	2.12941e-06	19.1248	19.1117	19.0946	22.1786	22.3963	22.791
EGC2_ARATH	sp|Q9ZV52|EGC2_ARATH EG45-like domain containing protein 2 OS=Arabidopsis thaliana OX=3702 GN=EGC2 PE=2 SV=2	EGC2	14518	1	8.46	1	3.34448	9.61787e-07	19.1248	19.1117	19.0946	22.7446	22.3316	22.2884
NATA1_ARATH	sp|Q9ZV05|NATA1_ARATH L-ornithine N5-acetyltransferase NATA1 OS=Arabidopsis thaliana OX=3702 GN=NATA1 PE=2 SV=1	NATA1	25821	3	13.16	2	3.32879	1.12182e-05	19.1248	19.1117	19.0946	22.9212	22.3651	22.0311
Q8GZJ9_ARATH	tr|Q8GZJ9|Q8GZJ9_ARATH Actin 8 (Fragment) OS=Arabidopsis thaliana OX=3702 PE=3 SV=1		9531	14	85.23	1	3.30798	1.272e-05	19.1248	19.1117	19.0946	22.5255	21.9159	22.8136
JOX2_ARATH	sp|Q9FFF6|JOX2_ARATH Jasmonate-induced oxygenase 2 OS=Arabidopsis thaliana OX=3702 GN=JOX2 PE=1 SV=1	JOX2	42177	3	12.13	2	3.27059	2.0465e-05	19.1248	19.1117	19.0946	22.8147	21.8348	22.4934
A0A178VQC0_ARATH	tr|A0A178VQC0|A0A178VQC0_ARATH Uncharacterized protein OS=Arabidopsis thaliana OX=3702 GN=At2g42710 PE=4 SV=1	At2g42710	45780	2	7.23	1	3.21919	6.22614e-05	19.1248	19.1117	19.0946	22.8535	21.652	22.4832
A0A178WK68_ARATH	tr|A0A178WK68|A0A178WK68_ARATH 5'-deoxynucleotidase OS=Arabidopsis thaliana OX=3702 GN=At1g26160 PE=3 SV=1	At1g26160	28695	2	11.63	2	3.16138	3.86205e-06	22.7717	22.6679	22.7745	26.1472	25.5293	26.0218
TSA1_ARATH	sp|F4ICX9|TSA1_ARATH TSK-associating protein 1 OS=Arabidopsis thaliana OX=3702 GN=TSA1 PE=1 SV=1	TSA1	84376	35	58.37	33	2.92392	0.000193956	25.3087	25.0685	24.3417	28.319	27.3585	27.8132
MLP28_ARATH	sp|Q9SSK9|MLP28_ARATH MLP-like protein 28 OS=Arabidopsis thaliana OX=3702 GN=MLP28 PE=1 SV=1	MLP28	37615	46	97.91	46	2.9012	1.30479e-05	28.9578	28.8927	29.3452	32.2658	31.6506	31.9829
PER37_ARATH	sp|Q9LDN9|PER37_ARATH Peroxidase 37 OS=Arabidopsis thaliana OX=3702 GN=PER37 PE=2 SV=1	PER37	38203	15	41.62	4	2.8809	0.000344585	22.0188	21.4873	21.3679	25.191	24.5073	23.8184
GL115_ARATH	sp|Q9FIC9|GL115_ARATH Germin-like protein subfamily 1 member 15 OS=Arabidopsis thaliana OX=3702 GN=At5g39120 PE=2 SV=1	At5g39120	23866	3	25.79	3	2.86057	0.00075352	22.3696	20.9097	22.513	24.6848	24.9047	24.7846
A0A178W1E8_ARATH	tr|A0A178W1E8|A0A178W1E8_ARATH Uncharacterized protein OS=Arabidopsis thaliana OX=3702 GN=AXX17_At1g13940 PE=4 SV=1	AXX17_At1g13940	44179	3	13.39	2	2.79634	5.07993e-06	19.1248	19.1117	19.0946	21.6865	22.2476	21.786
REM19_ARATH	sp|Q9XIB5|REM19_ARATH B3 domain-containing protein REM19 OS=Arabidopsis thaliana OX=3702 GN=REM19 PE=1 SV=1	REM19	25850	5	28.32	1	2.7884	4.9939e-06	19.1248	19.1117	19.0946	21.7814	22.2364	21.6785
E13A_ARATH	sp|P33157|E13A_ARATH Glucan endo-1,3-beta-glucosidase, acidic isoform OS=Arabidopsis thaliana OX=3702 GN=BG2 PE=1 SV=2	BG2	37339	18	61.65	18	2.77467	9.35256e-06	28.1147	28.0137	27.4829	30.5794	30.6814	30.6747
IRX9_ARATH	sp|Q9ZQC6|IRX9_ARATH Beta-1,4-xylosyltransferase IRX9 OS=Arabidopsis thaliana OX=3702 GN=IRX9 PE=1 SV=1	IRX9	40059	6	22.51	5	2.76072	2.00366e-06	21.6577	21.5377	21.3188	24.0938	24.3519	24.3507
U73B1_ARATH	sp|Q8VZE9|U73B1_ARATH UDP-glycosyltransferase 73B1 OS=Arabidopsis thaliana OX=3702 GN=UGT73B1 PE=2 SV=1	UGT73B1	54836	1	2.46	1	2.71636	1.85562e-06	19.1248	19.1117	19.0946	21.751	21.6598	22.0693
A0A178U7S0_ARATH	tr|A0A178U7S0|A0A178U7S0_ARATH Uncharacterized protein OS=Arabidopsis thaliana OX=3702 GN=AXX17_At5g29310 PE=4 SV=1	AXX17_At5g29310	19425	1	7.39	1	2.68439	2.41443e-05	19.1248	19.1117	19.0946	21.9722	21.3268	22.0852
A0A178UAX5_ARATH	tr|A0A178UAX5|A0A178UAX5_ARATH Peptidase A1 domain-containing protein OS=Arabidopsis thaliana OX=3702 GN=AXX17_At5g18960 PE=3 SV=1	AXX17_At5g18960	43405	3	9.63	2	2.65093	0.00171447	19.1248	19.1117	19.0946	22.8181	21.579	20.8868
A0A178UYH6_ARATH	tr|A0A178UYH6|A0A178UYH6_ARATH Uncharacterized protein OS=Arabidopsis thaliana OX=3702 GN=AXX17_At4g34080 PE=4 SV=1	AXX17_At4g34080	51636	3	8.03	3	2.63276	0.00187441	20.8948	20.8558	21.0663	24.6865	22.826	23.2027
A0A178UBZ6_ARATH	tr|A0A178UBZ6|A0A178UBZ6_ARATH (thale cress) hypothetical protein OS=Arabidopsis thaliana OX=3702 GN=AXX17_At5g15200 PE=1 SV=1	AXX17_At5g15200	242498	3	2.37	2	2.59994	0.000122829	19.1248	19.1117	19.0946	21.3188	22.3482	21.4639
O04907_ARATH	tr|O04907|O04907_ARATH Nitrilase 2 OS=Arabidopsis thaliana OX=3702 GN=nit2 PE=3 SV=2	nit2	37176	17	52.51	9	2.55666	0.000995923	24.9651	23.4446	23.5995	26.4764	26.5519	26.6509
A0A1I9LLZ4_ARATH	tr|A0A1I9LLZ4|A0A1I9LLZ4_ARATH Rubisco methyltransferase family protein OS=Arabidopsis thaliana OX=3702 GN=At3g07670 PE=1 SV=1	At3g07670	42658	1	3.28	1	2.51809	5.21943e-06	19.1248	19.1117	19.0946	21.5027	21.9249	21.4578
LYRM9_ARATH	sp|Q1G3M2|LYRM9_ARATH LYR motif-containing protein At3g19508 OS=Arabidopsis thaliana OX=3702 GN=At3g19508 PE=3 SV=1	At3g19508	9642	1	18.52	1	2.43757	7.05692e-06	19.1248	19.1117	19.0946	21.2563	21.6094	21.7782
PRP31_ARATH	sp|Q8RXN6|PRP31_ARATH U4/U6 small nuclear ribonucleoprotein Prp31 homolog OS=Arabidopsis thaliana OX=3702 GN=PRP31 PE=1 SV=1	PRP31	52645	3	9.48	3	2.40352	0.00265737	19.1248	19.1117	19.0946	20.946	22.6339	20.9618
A0A178UW02_ARATH	tr|A0A178UW02|A0A178UW02_ARATH NKS1 OS=Arabidopsis thaliana OX=3702 GN=At4g30996 PE=4 SV=1	At4g30996	19115	2	22.09	1	2.38661	1.57468e-06	19.1248	19.1117	19.0946	21.646	21.5034	21.3414
AB29B_ARATH	sp|Q9LZB8|AB29B_ARATH ABC transporter B family member 29, chloroplastic OS=Arabidopsis thaliana OX=3702 GN=ABCB29 PE=1 SV=1	ABCB29	69198	1	1.58	1	2.37737	1.53595e-05	19.1248	19.1117	19.0946	21.4866	21.1739	21.8027
GRXC1_ARATH	sp|Q8L8T2|GRXC1_ARATH Glutaredoxin-C1 OS=Arabidopsis thaliana OX=3702 GN=GRXC1 PE=2 SV=2	GRXC1	13611	2	10.4	2	2.36048	5.38804e-05	20.6754	20.1553	20.5064	22.5353	22.7201	23.1631
SHL_ARATH	sp|Q9FEN9|SHL_ARATH Chromatin remodeling protein SHL OS=Arabidopsis thaliana OX=3702 GN=SHL PE=1 SV=1	SHL	26122	1	3.95	1	2.35062	0.000123561	19.1248	19.1117	19.0946	21.8981	21.5649	20.9199
TBL29_ARATH	sp|Q9LY46|TBL29_ARATH Xylan O-acetyltransferase 1 OS=Arabidopsis thaliana OX=3702 GN=ESK1 PE=1 SV=1	ESK1	56695	6	13.76	5	2.3438	0.00196054	21.149	22.415	22.3258	24.6641	23.6941	24.5631
A0A178VMQ3_ARATH	tr|A0A178VMQ3|A0A178VMQ3_ARATH Uncharacterized protein OS=Arabidopsis thaliana OX=3702 GN=AXX17_At3g11820 PE=3 SV=1	AXX17_At3g11820	53019	4	7.61	2	2.33317	0.00424475	19.1248	19.1117	19.0946	20.9426	22.6415	20.7465
A0A384L0K4_ARATH	tr|A0A384L0K4|A0A384L0K4_ARATH Fes1 domain-containing protein OS=Arabidopsis thaliana OX=3702 GN=AXX17_At3g46370 PE=4 SV=1	AXX17_At3g46370	42530	5	18.85	3	2.31799	0.000193608	20.3298	20.8122	19.8033	22.8494	22.5099	22.54
A0A178U620_ARATH	tr|A0A178U620|A0A178U620_ARATH Uncharacterized protein OS=Arabidopsis thaliana OX=3702 GN=AXX17_ATUG01340 PE=4 SV=1	AXX17_ATUG01340	180922	1	0.5	1	2.30711	1.20607e-06	21.4406	21.3496	21.4053	23.7715	23.5784	23.7669
A0A178V0A8_ARATH	tr|A0A178V0A8|A0A178V0A8_ARATH Nodulin-like domain-containing protein OS=Arabidopsis thaliana OX=3702 GN=AXX17_At4g39930 PE=4 SV=1	AXX17_At4g39930	60880	2	3.35	2	2.27867	0.000207901	20.6294	20.5973	20.8898	23.4506	22.437	23.065
HDA5_ARATH	sp|Q8RX28|HDA5_ARATH Histone deacetylase 5 OS=Arabidopsis thaliana OX=3702 GN=HDA5 PE=1 SV=1	HDA5	72723	4	13.48	3	2.23188	0.000286569	20.8337	20.8231	20.1614	23.0534	23.092	22.3683
DMR6_ARATH	sp|Q9FLV0|DMR6_ARATH Protein DOWNY MILDEW RESISTANCE 6 OS=Arabidopsis thaliana OX=3702 GN=DMR6 PE=1 SV=1	DMR6	39364	8	32.84	7	2.21142	0.00147364	24.0643	23.2891	22.5829	25.657	25.2302	25.6834
SOT11_ARATH	sp|Q8RV79|SOT11_ARATH Cytosolic sulfotransferase 11 OS=Arabidopsis thaliana OX=3702 GN=SOT11 PE=2 SV=1	SOT11	40838	4	12.82	4	2.18257	8.85239e-05	21.4664	21.1598	21.6209	23.5479	23.2731	23.9738
CHI_ARATH	sp|O24603|CHI_ARATH Endochitinase CHI OS=Arabidopsis thaliana OX=3702 GN=CHI PE=2 SV=1	CHI	29775	9	54.15	9	2.17698	0.00068926	25.0675	24.085	23.8313	26.4505	26.5733	26.4909
IRX14_ARATH	sp|Q8L707|IRX14_ARATH Beta-1,4-xylosyltransferase IRX14 OS=Arabidopsis thaliana OX=3702 GN=IRX14 PE=1 SV=1	IRX14	59099	6	15.05	4	2.15692	0.00373982	20.5343	22.2812	21.4856	23.6684	23.2314	23.8722
A0A178W2E2_ARATH	tr|A0A178W2E2|A0A178W2E2_ARATH (thale cress) hypothetical protein OS=Arabidopsis thaliana OX=3702 GN=At2g39420 PE=4 SV=1	At2g39420	35704	7	34.38	6	2.13921	1.6333e-06	22.9128	23.0634	23.1097	25.1351	25.1602	25.2081
R15A4_ARATH	sp|Q9LX88|R15A4_ARATH 40S ribosomal protein S15a-4 OS=Arabidopsis thaliana OX=3702 GN=RPS15AD PE=2 SV=3	RPS15AD	14774	12	71.54	2	2.13126	7.64624e-05	22.6774	22.2736	22.4475	24.2967	24.9712	24.5243
RAC4_ARATH	sp|Q38919|RAC4_ARATH Rac-like GTP-binding protein ARAC4 OS=Arabidopsis thaliana OX=3702 GN=ARAC4 PE=1 SV=1	ARAC4	21636	6	34.36	1	2.12678	2.98414e-06	19.1248	19.1117	19.0946	21.0725	21.3704	21.2686
P5CR1_ARATH	sp|P54904|P5CR1_ARATH Pyrroline-5-carboxylate reductase OS=Arabidopsis thaliana OX=3702 GN=PROC1 PE=2 SV=1	PROC1	28624	4	13.04	3	2.08669	0.00475052	20.9751	20.3277	20.9229	22.2749	23.8447	22.3662
QSOX2_ARATH	sp|Q9ZU40|QSOX2_ARATH Sulfhydryl oxidase 2 OS=Arabidopsis thaliana OX=3702 GN=QSOX2 PE=2 SV=2	QSOX2	55919	3	9.09	3	2.08296	0.000741525	20.7076	20.8689	20.7353	22.1441	23.3427	23.0738
PMTE_ARATH	sp|Q94EJ6|PMTE_ARATH Probable methyltransferase PMT14 OS=Arabidopsis thaliana OX=3702 GN=At4g18030 PE=2 SV=1	At4g18030	70337	19	40.58	15	2.07711	2.59595e-06	23.9466	23.9276	23.7464	26.03	25.9347	25.8871
RFA2A_ARATH	sp|Q9ZQ19|RFA2A_ARATH Replication protein A 32 kDa subunit A OS=Arabidopsis thaliana OX=3702 GN=RPA2A PE=1 SV=2	RPA2A	30980	2	15.77	2	2.0636	0.000123315	19.1248	19.1117	19.0946	20.8205	21.0542	21.6472
VHAA1_ARATH	sp|Q8RWZ7|VHAA1_ARATH V-type proton ATPase subunit a1 OS=Arabidopsis thaliana OX=3702 GN=VHA-a1 PE=2 SV=1	VHA-a1	93415	9	14.2	8	2.01546	0.000320049	21.7498	22.1586	22.6656	24.3175	24.3555	23.9474
A0A5S9WY32_ARATH	tr|A0A5S9WY32|A0A5S9WY32_ARATH RING-type domain-containing protein OS=Arabidopsis thaliana OX=3702 GN=C24_LOCUS7722 PE=3 SV=1	C24_LOCUS7722	62039	9	26.86	5	2.01382	0.000179164	21.7982	22.626	22.43	24.4166	24.309	24.1701
BGL18_ARATH	sp|Q9SE50|BGL18_ARATH Beta-D-glucopyranosyl abscisate beta-glucosidase OS=Arabidopsis thaliana OX=3702 GN=BGLU18 PE=1 SV=2	BGLU18	60459	38	67.99	37	1.99752	9.50702e-06	28.7583	28.7874	28.832	31.0204	30.6272	30.7226
A0A178U8E3_ARATH	tr|A0A178U8E3|A0A178U8E3_ARATH Uncharacterized protein OS=Arabidopsis thaliana OX=3702 GN=AXX17_At5g66500 PE=3 SV=1	AXX17_At5g66500	22565	3	19.81	3	1.98821	1.73206e-05	21.6588	21.4319	21.3907	23.2478	23.5946	23.6036
A0A7G2FBI7_ARATH	tr|A0A7G2FBI7|A0A7G2FBI7_ARATH (thale cress) hypothetical protein OS=Arabidopsis thaliana OX=3702 GN=AT9943_LOCUS18523 PE=4 SV=1	AT9943_LOCUS18523	88328	25	29	25	1.94954	0.000574539	27.3468	26.2977	26.8389	28.9653	28.5821	28.7845
PMT12_ARATH	sp|Q8RWB7|PMT12_ARATH Probable methyltransferase At1g29790 OS=Arabidopsis thaliana OX=3702 GN=CLSC5 PE=2 SV=1	CLSC5	41956	5	20.63	4	1.94848	0.00238984	21.5033	21.6143	22.8706	23.9371	23.9151	23.9815
PGIP2_ARATH	sp|Q9M5J8|PGIP2_ARATH Polygalacturonase inhibitor 2 OS=Arabidopsis thaliana OX=3702 GN=PGIP2 PE=2 SV=2	PGIP2	37068	21	63.03	2	1.92257	2.36837e-05	24.2014	24.116	23.9704	26.1127	25.7561	26.1867
HPAT1_ARATH	sp|Q8W4E6|HPAT1_ARATH Hydroxyproline O-arabinosyltransferase 1 OS=Arabidopsis thaliana OX=3702 GN=HPAT1 PE=1 SV=1	HPAT1	40973	3	13.39	3	1.91381	0.000101592	22.6118	22.8555	22.2927	24.2525	24.5137	24.7352
LRL14_ARATH	sp|F4HQ17|LRL14_ARATH LEAF RUST 10 DISEASE-RESISTANCE LOCUS RECEPTOR-LIKE PROTEIN KINASE-like 1.4 OS=Arabidopsis thaliana OX=3702 GN=LRK10L-1.4 PE=2 SV=2	LRK10L-1.4	74127	2	3.32	1	1.87158	0.000184089	19.1248	19.1117	19.0946	21.197	21.2443	20.5045
CLH1_ARATH	sp|O22527|CLH1_ARATH Chlorophyllase-1 OS=Arabidopsis thaliana OX=3702 GN=CLH1 PE=1 SV=1	CLH1	34855	7	44.44	5	1.85966	0.000838972	23.7257	23.0348	23.9028	25.8013	25.1312	25.3098
A0A5S9X5C7_ARATH	tr|A0A5S9X5C7|A0A5S9X5C7_ARATH Uncharacterized protein OS=Arabidopsis thaliana OX=3702 GN=AN1_LOCUS10395 PE=3 SV=1	AN1_LOCUS10395	50443	30	70.59	29	1.85603	0.000116005	26.3595	26.6981	26.4987	28.7059	28.0523	28.3662
PUMY_ARATH	sp|Q84K35|PUMY_ARATH Pseudouridine-5'-phosphate glycosidase OS=Arabidopsis thaliana OX=3702 GN=PUMY PE=1 SV=1	PUMY	34800	4	18.18	1	1.85485	0.00196917	19.1248	19.1117	19.0946	21.7627	20.5799	20.553
MBF1B_ARATH	sp|Q9LXT3|MBF1B_ARATH Multiprotein-bridging factor 1b OS=Arabidopsis thaliana OX=3702 GN=MBF1B PE=1 SV=1	MBF1B	15582	4	45.07	4	1.85099	6.29214e-05	23.0209	22.9318	22.8787	25.0483	24.4517	24.8844
ALKR5_ARATH	sp|Q9ASZ9|ALKR5_ARATH Probable aldo-keto reductase 5 OS=Arabidopsis thaliana OX=3702 GN=At1g60730 PE=2 SV=1	At1g60730	37857	14	36.23	6	1.80843	0.000148632	22.7796	22.6187	23.2892	24.612	24.8684	24.6324
BBE26_ARATH	sp|Q9FKU8|BBE26_ARATH Berberine bridge enzyme-like 26 OS=Arabidopsis thaliana OX=3702 GN=At5g44400 PE=2 SV=1	At5g44400	60345	20	40.78	20	1.79353	0.000255888	26.1908	25.8178	25.9039	28.1882	27.6358	27.4691
UXS1_ARATH	sp|Q8VZC0|UXS1_ARATH UDP-glucuronic acid decarboxylase 1 OS=Arabidopsis thaliana OX=3702 GN=UXS1 PE=1 SV=1	UXS1	48631	20	46.44	17	1.76194	4.33669e-05	24.856	24.6788	25.154	26.5445	26.6522	26.7778
GDL20_ARATH	sp|Q9C5N8|GDL20_ARATH GDSL esterase/lipase At1g54020 OS=Arabidopsis thaliana OX=3702 GN=At1g54020 PE=2 SV=1	At1g54020	41801	2	11.83	1	1.75692	0.000576835	19.1248	19.1117	19.0946	21.3184	20.9481	20.3355
A0A178UHT5_ARATH	tr|A0A178UHT5|A0A178UHT5_ARATH (thale cress) hypothetical protein OS=Arabidopsis thaliana OX=3702 GN=AXX17_At5g37830 PE=4 SV=1	AXX17_At5g37830	20631	2	8.74	2	1.73377	0.00191732	21.0207	21.8601	22.0704	23.0254	23.6135	23.5136
CAMT1_ARATH	sp|Q9C9W3|CAMT1_ARATH Putative caffeoyl-CoA O-methyltransferase At1g67980 OS=Arabidopsis thaliana OX=3702 GN=At1g67980 PE=2 SV=1	At1g67980	26114	1	8.62	1	1.72114	0.00329572	19.1248	19.1117	19.0946	20.5847	21.6371	20.2728
A0A654G4D5_ARATH	tr|A0A654G4D5|A0A654G4D5_ARATH Uncharacterized protein OS=Arabidopsis thaliana OX=3702 GN=At5g24690 PE=3 SV=1	At5g24690	56812	6	17.08	5	1.68504	0.00208536	22.3333	21.4077	21.3764	23.7506	23.1418	23.28
ATS3A_ARATH	sp|Q681K2|ATS3A_ARATH Embryo-specific protein ATS3A OS=Arabidopsis thaliana OX=3702 GN=ATS3A PE=1 SV=1	ATS3A	19949	4	21.23	4	1.65022	0.00366427	24.0304	23.0851	24.428	25.374	25.5086	25.6117
LECT2_ARATH	sp|Q9LJR2|LECT2_ARATH Lectin-like protein LEC OS=Arabidopsis thaliana OX=3702 GN=LEC PE=1 SV=1	LEC	29749	14	50.92	9	1.64442	0.000216914	26.2053	26.133	25.5405	27.6171	27.5674	27.6276
TMN4_ARATH	sp|Q9FHT4|TMN4_ARATH Transmembrane 9 superfamily member 4 OS=Arabidopsis thaliana OX=3702 GN=TMN4 PE=2 SV=1	TMN4	68079	4	9.11	2	1.6375	0.000484867	22.6874	22.2133	22.9423	24.3432	23.9822	24.4301
BGNEM_ARATH	sp|Q8VZJ2|BGNEM_ARATH Probable glucan endo-1,3-beta-glucosidase At4g16260 OS=Arabidopsis thaliana OX=3702 GN=At4g16260 PE=1 SV=1	At4g16260	37712	16	53.78	15	1.6344	0.000662258	26.6007	26.6162	27.2747	28.7739	28.357	28.2639
CRK8_ARATH	sp|O65468|CRK8_ARATH Cysteine-rich receptor-like protein kinase 8 OS=Arabidopsis thaliana OX=3702 GN=CRK8 PE=3 SV=2	CRK8	75412	7	11.83	1	1.62962	2.64952e-05	19.1248	19.1117	19.0946	20.6397	20.9702	20.6101
PMT8_ARATH	sp|Q940J9|PMT8_ARATH Probable methyltransferase PMT8 OS=Arabidopsis thaliana OX=3702 GN=At1g04430 PE=2 SV=1	At1g04430	70508	10	20.39	5	1.623	0.00104579	23.0929	22.9413	23.8806	24.7932	25.0136	24.9771
DEF02_ARATH	sp|Q39182|DEF02_ARATH Defensin-like protein 2 OS=Arabidopsis thaliana OX=3702 GN=PDF2.2 PE=2 SV=1	PDF2.2	8524	1	33.77	1	1.59339	0.000154596	21.234	21.5009	21.5915	22.7378	23.2424	23.1264
JAL28_ARATH	sp|Q9SDM9|JAL28_ARATH Nitrile-specifier protein 1 OS=Arabidopsis thaliana OX=3702 GN=NSP1 PE=1 SV=2	NSP1	51670	22	61.91	21	1.5894	0.000190487	26.5658	26.3971	26.1899	28.0867	27.6524	28.182
MDAR3_ARATH	sp|Q9SR59|MDAR3_ARATH Monodehydroascorbate reductase 3 OS=Arabidopsis thaliana OX=3702 GN=MDAR3 PE=2 SV=1	MDAR3	48363	17	51.25	16	1.58879	0.00050666	25.7434	26.1952	25.8637	27.9364	27.295	27.3374
CRK2_ARATH	sp|Q9CAL3|CRK2_ARATH Cysteine-rich receptor-like protein kinase 2 OS=Arabidopsis thaliana OX=3702 GN=CRK2 PE=1 SV=1	CRK2	72000	2	3.85	2	1.58619	0.00492356	20.7436	21.1747	20.9559	21.8786	22.507	23.2472
SBIR1_ARATH	sp|Q9SKB2|SBIR1_ARATH Leucine-rich repeat receptor-like serine/threonine/tyrosine-protein kinase SOBIR1 OS=Arabidopsis thaliana OX=3702 GN=SOBIR1 PE=1 SV=1	SOBIR1	71111	7	19.5	6	1.58375	8.39499e-05	23.3834	22.9548	23.0258	24.625	24.8745	24.6157
A0A178UW63_ARATH	tr|A0A178UW63|A0A178UW63_ARATH Glyco_hydro_19_cat domain-containing protein OS=Arabidopsis thaliana OX=3702 GN=AXX17_At4g02140 PE=4 SV=1	AXX17_At4g02140	31479	8	38.93	8	1.56157	7.19916e-05	24.0151	23.9173	24.1857	25.8073	25.3761	25.6195
A0A1P8AMP4_ARATH	tr|A0A1P8AMP4|A0A1P8AMP4_ARATH Calcium-dependent lipid-binding family protein OS=Arabidopsis thaliana OX=3702 GN=At1g48090 PE=1 SV=1	At1g48090	460331	18	6.29	8	1.54735	0.00374264	21.5666	22.5461	22.1598	23.3334	23.448	24.1331
SDR3A_ARATH	sp|O80713|SDR3A_ARATH Short-chain dehydrogenase reductase 3a OS=Arabidopsis thaliana OX=3702 GN=SDR3a PE=2 SV=1	SDR3a	26901	5	29.96	5	1.5406	6.63271e-05	23.4381	23.4263	23.2126	25.0906	24.6776	24.9305
PHYB_ARATH	sp|P14713|PHYB_ARATH Phytochrome B OS=Arabidopsis thaliana OX=3702 GN=PHYB PE=1 SV=1	PHYB	129331	6	7	6	1.51911	0.000211389	21.8982	22.2238	21.6465	23.2645	23.5315	23.5299
CP21C_ARATH	sp|Q94A16|CP21C_ARATH Peptidyl-prolyl cis-trans isomerase CYP21-3, mitochondrial OS=Arabidopsis thaliana OX=3702 GN=CYP21-3 PE=2 SV=2	CYP21-3	26042	3	23.48	2	1.51472	0.000941987	21.1947	21.5034	20.9701	22.7326	23.1222	22.3575
RHON1_ARATH	sp|Q94K75|RHON1_ARATH Rho-N domain-containing protein 1, chloroplastic OS=Arabidopsis thaliana OX=3702 GN=RHON1 PE=1 SV=1	RHON1	44530	2	6.73	2	1.50576	3.06772e-05	20.1386	20.1748	19.9468	21.4527	21.7142	21.6107
GSTF6_ARATH	sp|P42760|GSTF6_ARATH Glutathione S-transferase F6 OS=Arabidopsis thaliana OX=3702 GN=GSTF6 PE=2 SV=2	GSTF6	23486	23	89.42	9	1.50467	0.00119572	26.4908	25.9709	25.5542	27.4618	27.4016	27.6665
DRL36_ARATH	sp|Q8VZC7|DRL36_ARATH Probable disease resistance protein At5g45510 OS=Arabidopsis thaliana OX=3702 GN=At5g45510 PE=1 SV=2	At5g45510	137926	5	5.24	3	1.49509	0.000602044	21.0612	21.4929	21.4893	23.2058	22.556	22.7668
LEUD2_ARATH	sp|Q9LYT7|LEUD2_ARATH 3-isopropylmalate dehydratase small subunit 3 OS=Arabidopsis thaliana OX=3702 GN=SSU3 PE=1 SV=1	SSU3	27208	11	47.83	9	1.49108	0.00490104	23.9268	25.0197	25.1259	26.2517	26.2253	26.0686
BSL3_ARATH	sp|Q9SHS7|BSL3_ARATH Serine/threonine-protein phosphatase BSL3 OS=Arabidopsis thaliana OX=3702 GN=BSL3 PE=1 SV=2	BSL3	107523	17	23.66	2	1.4795	0.000418885	21.1955	21.4689	21.4616	22.6241	22.694	23.2464
RL92_ARATH	sp|Q9SZX9|RL92_ARATH 60S ribosomal protein L9-2 OS=Arabidopsis thaliana OX=3702 GN=RPL9D PE=2 SV=1	RPL9D	21974	10	45.36	3	1.47691	0.000838447	22.1904	23.0193	22.4782	24.1285	23.8883	24.1018
CRK9_ARATH	sp|O65469|CRK9_ARATH Putative cysteine-rich receptor-like protein kinase 9 OS=Arabidopsis thaliana OX=3702 GN=CRK9 PE=5 SV=1	CRK9	29722	6	32.83	5	1.47636	0.00235313	24.3433	24.2194	25.2413	26.029	26.121	26.0831
Q9SJK5_ARATH	tr|Q9SJK5|Q9SJK5_ARATH Translin-like protein OS=Arabidopsis thaliana OX=3702 GN=At2g37020 PE=2 SV=2	At2g37020	27327	8	42.44	8	1.43619	0.000945161	23.6005	23.1372	22.7339	24.6208	24.5184	24.6409
PLY11_ARATH	sp|Q9LTZ0|PLY11_ARATH Putative pectate lyase 11 OS=Arabidopsis thaliana OX=3702 GN=At3g27400 PE=3 SV=2	At3g27400	45985	6	22.57	3	1.41772	2.64649e-05	22.5671	22.4902	22.4824	23.9113	24.0773	23.8044
A0A654F3P9_ARATH	tr|A0A654F3P9|A0A654F3P9_ARATH ASCH domain-containing protein OS=Arabidopsis thaliana OX=3702 GN=AN1_LOCUS11608 PE=4 SV=1	AN1_LOCUS11608	27118	2	10.25	1	1.39819	0.000268055	19.1248	19.1117	19.0946	20.8484	20.4374	20.2399
UGDH4_ARATH	sp|Q9FM01|UGDH4_ARATH UDP-glucose 6-dehydrogenase 4 OS=Arabidopsis thaliana OX=3702 GN=UGD4 PE=1 SV=1	UGD4	53097	30	67.71	11	1.38264	0.00136299	24.1916	24.7202	25.0502	26.0069	25.9083	26.1947
Y5713_ARATH	sp|Q93XX5|Y5713_ARATH PI-PLC X domain-containing protein At5g67130 OS=Arabidopsis thaliana OX=3702 GN=At5g67130 PE=1 SV=1	At5g67130	46607	3	14.79	2	1.37744	8.78842e-05	21.5273	21.491	21.8661	23.0869	22.9411	22.9887
XXT5_ARATH	sp|Q9CA75|XXT5_ARATH Probable xyloglucan 6-xylosyltransferase 5 OS=Arabidopsis thaliana OX=3702 GN=XXT5 PE=1 SV=1	XXT5	51728	3	8.75	3	1.37414	0.00196435	21.3212	21.1057	21.19	23.0587	22.094	22.5866
PDI12_ARATH	sp|Q9SRG3|PDI12_ARATH Protein disulfide isomerase-like 1-2 OS=Arabidopsis thaliana OX=3702 GN=PDIL1-2 PE=2 SV=1	PDIL1-2	56365	28	60.04	22	1.36985	4.58154e-05	26.126	26.276	26.2308	27.7419	27.4376	27.5629
A0A178USI4_ARATH	tr|A0A178USI4|A0A178USI4_ARATH 3-hydroxyacyl-[acyl-carrier-protein] dehydratase OS=Arabidopsis thaliana OX=3702 GN=AXX17_At5g09790 PE=3 SV=1	AXX17_At5g09790	24123	13	36.53	13	1.36653	0.000124234	27.4014	27.5333	27.2434	28.5645	28.7615	28.9516
A0A178VL07_ARATH	tr|A0A178VL07|A0A178VL07_ARATH Uncharacterized protein OS=Arabidopsis thaliana OX=3702 GN=AXX17_At3g45330 PE=4 SV=1	AXX17_At3g45330	77649	7	13.18	7	1.36598	0.0004919	23.7609	23.3958	23.5386	25.2042	24.6103	24.9789
UGGG_ARATH	sp|Q0WL80|UGGG_ARATH UDP-glucose:glycoprotein glucosyltransferase OS=Arabidopsis thaliana OX=3702 GN=UGGT PE=1 SV=1	UGGT	181805	46	39.43	37	1.34518	4.40144e-05	26.4167	26.3455	26.6275	27.7449	27.8027	27.8777
ACCO4_ARATH	sp|Q06588|ACCO4_ARATH 1-aminocyclopropane-1-carboxylate oxidase 4 OS=Arabidopsis thaliana OX=3702 GN=ACO4 PE=1 SV=2	ACO4	36677	15	57.89	10	1.32483	0.00157651	24.8577	24.9075	25.6163	26.3082	26.4428	26.6049
APBLC_ARATH	sp|O81742|APBLC_ARATH Beta-adaptin-like protein C OS=Arabidopsis thaliana OX=3702 GN=BETAC-AD PE=1 SV=2	BETAC-AD	99097	33	38.19	4	1.3067	0.00135584	23.7375	24.0006	24.2404	25.4535	25.5402	24.9049
U87A2_ARATH	sp|O64733|U87A2_ARATH UDP-glycosyltransferase 87A2 OS=Arabidopsis thaliana OX=3702 GN=UGT87A2 PE=1 SV=1	UGT87A2	51728	4	12.31	3	1.30225	0.00103913	22.4341	22.4194	21.8169	23.3383	23.5292	23.7097
A0A7G2E552_ARATH	tr|A0A7G2E552|A0A7G2E552_ARATH (thale cress) hypothetical protein OS=Arabidopsis thaliana OX=3702 GN=AT9943_LOCUS5531 PE=4 SV=1	AT9943_LOCUS5531	23024	15	80.28	14	1.29743	0.000503075	28.6962	28.3369	28.1144	29.762	29.7727	29.505
UXS4_ARATH	sp|Q8S8T4|UXS4_ARATH UDP-glucuronic acid decarboxylase 4 OS=Arabidopsis thaliana OX=3702 GN=UXS4 PE=2 SV=1	UXS4	49945	20	50.79	16	1.29286	0.000213772	25.8617	25.4714	25.9317	27.0627	27.1178	26.9629
JAL35_ARATH	sp|O04309|JAL35_ARATH Jacalin-related lectin 35 OS=Arabidopsis thaliana OX=3702 GN=JAL35 PE=1 SV=1	JAL35	48497	25	77.83	23	1.29038	0.000314723	27.7426	27.6477	27.6637	29.2406	28.6741	29.0104
PPA1_ARATH	sp|Q9LMX4|PPA1_ARATH Probable inactive purple acid phosphatase 1 OS=Arabidopsis thaliana OX=3702 GN=PAP1 PE=2 SV=1	PAP1	68242	3	7.01	3	1.28118	7.25002e-05	22.2432	22.3855	22.165	23.3931	23.662	23.5822
GUX1_ARATH	sp|Q9LSB1|GUX1_ARATH UDP-glucuronate:xylan alpha-glucuronosyltransferase 1 OS=Arabidopsis thaliana OX=3702 GN=GUX1 PE=2 SV=1	GUX1	76285	13	28.38	11	1.27145	0.00187634	23.9074	24.4972	24.681	25.5892	25.4696	25.8411
BCB2_ARATH	sp|O80517|BCB2_ARATH Uclacyanin-2 OS=Arabidopsis thaliana OX=3702 GN=At2g44790 PE=2 SV=1	At2g44790	20354	6	30.2	6	1.27015	4.82893e-05	25.7696	25.9076	26.0236	27.2399	27.1696	27.1018
PME18_ARATH	sp|Q1JPL7|PME18_ARATH Pectinesterase/pectinesterase inhibitor 18 OS=Arabidopsis thaliana OX=3702 GN=PME18 PE=1 SV=3	PME18	61687	24	32.32	23	1.27005	0.00116985	27.7729	27.4344	27.5085	29.1275	28.9543	28.4441
SCP42_ARATH	sp|Q9FH05|SCP42_ARATH Serine carboxypeptidase-like 42 OS=Arabidopsis thaliana OX=3702 GN=SCPL42 PE=2 SV=1	SCPL42	52874	17	42.92	17	1.26589	9.8331e-05	26.0582	25.9286	26.2169	27.3238	27.4693	27.2083
ARGI2_ARATH	sp|Q9ZPF5|ARGI2_ARATH Arginase 2, chloroplastic/mitochondrial OS=Arabidopsis thaliana OX=3702 GN=ARGAH2 PE=1 SV=1	ARGAH2	37980	15	70.06	14	1.25288	0.00173299	25.0129	24.9757	25.2866	26.7787	26.0051	26.25
Y3293_ARATH	sp|Q9M8T5|Y3293_ARATH WEB family protein At3g02930, chloroplastic OS=Arabidopsis thaliana OX=3702 GN=At3g02930 PE=3 SV=1	At3g02930	91859	1	2.23	1	1.2351	3.24333e-05	19.1248	19.1117	19.0946	20.4575	20.2657	20.3132
A0A7G2ES21_ARATH	tr|A0A7G2ES21|A0A7G2ES21_ARATH (thale cress) hypothetical protein OS=Arabidopsis thaliana OX=3702 GN=AT9943_LOCUS12992 PE=4 SV=1	AT9943_LOCUS12992	142377	4	4.77	3	1.20316	0.00253823	23.8398	23.8253	24.5572	25.4546	25.2504	25.1267
PMTD_ARATH	sp|Q93W95|PMTD_ARATH Probable pectin methyltransferase QUA3 OS=Arabidopsis thaliana OX=3702 GN=QUA3 PE=2 SV=1	QUA3	67555	10	17.83	7	1.19232	0.000536157	23.4956	23.1814	23.127	24.6064	24.5709	24.2036
APS3_ARATH	sp|O23324|APS3_ARATH ATP-sulfurylase 3, chloroplastic OS=Arabidopsis thaliana OX=3702 GN=APS3 PE=1 SV=1	APS3	52030	29	41.51	2	1.16445	0.00148051	21.2393	21.6655	21.6733	22.65	22.4279	22.9934
GXM3_ARATH	sp|Q9LQ32|GXM3_ARATH Glucuronoxylan 4-O-methyltransferase 3 OS=Arabidopsis thaliana OX=3702 GN=GXM3 PE=1 SV=1	GXM3	33670	9	56.57	8	1.15142	0.000383064	25.064	25.3856	25.4032	26.3526	26.32	26.6345
IF4A3_ARATH	sp|Q9CAI7|IF4A3_ARATH Eukaryotic initiation factor 4A-3 OS=Arabidopsis thaliana OX=3702 GN=TIF4A-3 PE=1 SV=1	TIF4A-3	46771	23	46.86	1	1.13715	0.00176364	20.6024	21.0257	21.0503	21.7042	22.2566	22.129
GGR_ARATH	sp|Q39108|GGR_ARATH Heterodimeric geranylgeranyl pyrophosphate synthase small subunit, chloroplastic OS=Arabidopsis thaliana OX=3702 GN=GGR PE=1 SV=2	GGR	35189	10	52.15	8	1.13377	0.00325054	23.9411	24.5943	24.6106	25.7686	25.4601	25.3186
EXPA1_ARATH	sp|Q9C554|EXPA1_ARATH Expansin-A1 OS=Arabidopsis thaliana OX=3702 GN=EXPA1 PE=2 SV=1	EXPA1	26518	1	3.6	1	1.13325	0.000973841	22.5714	22.3862	22.0102	23.29	23.4707	23.6067
TMN9_ARATH	sp|Q9C5N2|TMN9_ARATH Transmembrane 9 superfamily member 9 OS=Arabidopsis thaliana OX=3702 GN=TMN9 PE=2 SV=1	TMN9	74120	22	24.84	21	1.13256	0.000920792	26.5016	26.7171	26.2424	27.6584	27.3856	27.8148
A0A178VWX1_ARATH	tr|A0A178VWX1|A0A178VWX1_ARATH (thale cress) hypothetical protein OS=Arabidopsis thaliana OX=3702 GN=At2g45200 PE=3 SV=1	At2g45200	26470	7	43.1	6	1.13046	0.00415634	22.7376	23.3379	22.733	24.1088	24.3632	23.7279
GUX6_ARATH	sp|Q8GWB7|GUX6_ARATH Inositol phosphorylceramide glucuronosyltransferase 1 OS=Arabidopsis thaliana OX=3702 GN=IPUT1 PE=1 SV=1	IPUT1	60011	5	11.73	4	1.12817	0.0020867	22.9099	22.7007	23.1852	24.0247	23.7662	24.3894
IRX10_ARATH	sp|Q9FZJ1|IRX10_ARATH Probable beta-1,4-xylosyltransferase IRX10 OS=Arabidopsis thaliana OX=3702 GN=IRX10 PE=2 SV=1	IRX10	46843	10	27.67	9	1.12473	0.00118401	24.3632	24.9687	24.5921	25.6181	25.76	25.9201
G3PP2_ARATH	sp|Q5E924|G3PP2_ARATH Glyceraldehyde-3-phosphate dehydrogenase GAPCP2, chloroplastic OS=Arabidopsis thaliana OX=3702 GN=GAPCP2 PE=2 SV=1	GAPCP2	44846	10	24.05	1	1.09259	0.000225845	19.1248	19.1117	19.0946	20.0256	20.1686	20.4147
A0A178UQ32_ARATH	tr|A0A178UQ32|A0A178UQ32_ARATH PK3 OS=Arabidopsis thaliana OX=3702 GN=AXX17_At5g07940 PE=3 SV=1	AXX17_At5g07940	38636	14	66.28	11	1.09215	0.00153563	25.3312	24.8186	25.4767	26.3697	26.2472	26.286
A0A178VJH8_ARATH	tr|A0A178VJH8|A0A178VJH8_ARATH Uncharacterized protein OS=Arabidopsis thaliana OX=3702 GN=AXX17_At3g31390 PE=4 SV=1	AXX17_At3g31390	76458	9	20.67	6	1.09071	0.000825371	24.4355	24.3909	23.9943	25.5485	25.2135	25.3309
COPZ3_ARATH	sp|Q8H1F4|COPZ3_ARATH Coatomer subunit zeta-3 OS=Arabidopsis thaliana OX=3702 GN=At4g08520 PE=2 SV=1	At4g08520	19877	4	32.6	4	1.08944	0.00402775	24.6151	23.9233	23.9192	25.0084	25.3671	25.3504
HEVL_ARATH	sp|P43082|HEVL_ARATH Hevein-like preproprotein OS=Arabidopsis thaliana OX=3702 GN=HEL PE=1 SV=1	HEL	22937	6	31.6	5	1.08756	0.000985024	27.9454	28.195	28.4954	29.4578	29.2592	29.1816
MPK3_ARATH	sp|Q39023|MPK3_ARATH Mitogen-activated protein kinase 3 OS=Arabidopsis thaliana OX=3702 GN=MPK3 PE=1 SV=2	MPK3	42717	10	39.46	8	1.08744	0.00176656	23.9424	24.4809	24.6068	25.3685	25.5242	25.3997
A0A178UID1_ARATH	tr|A0A178UID1|A0A178UID1_ARATH Uncharacterized protein OS=Arabidopsis thaliana OX=3702 GN=AXX17_At5g39900 PE=4 SV=1	AXX17_At5g39900	50256	7	19.59	7	1.08539	0.00109655	24.4786	24.2271	24.3124	25.1373	25.4166	25.7203
GSTF7_ARATH	sp|Q9SRY5|GSTF7_ARATH Glutathione S-transferase F7 OS=Arabidopsis thaliana OX=3702 GN=GSTF7 PE=2 SV=3	GSTF7	23598	25	91.39	23	1.05766	0.000419822	28.4057	27.9798	28.2659	29.1858	29.3092	29.3294
FTSH4_ARATH	sp|O80983|FTSH4_ARATH ATP-dependent zinc metalloprotease FTSH 4, mitochondrial OS=Arabidopsis thaliana OX=3702 GN=FTSH4 PE=1 SV=2	FTSH4	77275	6	11.72	3	1.05419	0.000169175	22.079	22.1252	22.0804	23.0677	23.3334	23.046
ARC6_ARATH	sp|Q9FIG9|ARC6_ARATH Protein ACCUMULATION AND REPLICATION OF CHLOROPLASTS 6, chloroplastic OS=Arabidopsis thaliana OX=3702 GN=ARC6 PE=1 SV=1	ARC6	88260	5	9.86	4	1.05337	0.00304686	21.9753	22.6526	22.1635	23.539	23.1643	23.2483
A0A178V0I5_ARATH	tr|A0A178V0I5|A0A178V0I5_ARATH (thale cress) hypothetical protein OS=Arabidopsis thaliana OX=3702 GN=AXX17_At4g31580 PE=1 SV=1	AXX17_At4g31580	27622	8	57.6	8	1.04482	0.00010384	25.1783	25.382	25.2218	26.2435	26.3541	26.319
ADT3_ARATH	sp|O49447|ADT3_ARATH ADP,ATP carrier protein 3, mitochondrial OS=Arabidopsis thaliana OX=3702 GN=AAC3 PE=1 SV=1	AAC3	40718	31	48.28	5	1.04146	0.00336068	23.6926	24.1946	23.4381	24.9564	24.7886	24.7048
SAG13_ARATH	sp|Q9ZW18|SAG13_ARATH Senescence-associated protein 13 OS=Arabidopsis thaliana OX=3702 GN=SAG13 PE=1 SV=1	SAG13	28820	10	57.25	8	1.03948	0.00296823	24.6728	24.2552	24.2124	25.7636	25.2363	25.2589
LECT6_ARATH	sp|Q9LZF5|LECT6_ARATH Lectin-like protein OS=Arabidopsis thaliana OX=3702 GN=LLP PE=1 SV=1	LLP	30162	11	50.36	9	1.02936	0.000366872	25.8726	25.5467	25.5856	26.6739	26.6005	26.8187
PECT1_ARATH	sp|Q9ZVI9|PECT1_ARATH Ethanolamine-phosphate cytidylyltransferase OS=Arabidopsis thaliana OX=3702 GN=PECT1 PE=1 SV=1	PECT1	46978	12	43.23	10	1.02279	0.000862379	24.4484	24.5598	24.8748	25.6772	25.4785	25.7956
CALR3_ARATH	sp|O04153|CALR3_ARATH Calreticulin-3 OS=Arabidopsis thaliana OX=3702 GN=CRT3 PE=1 SV=2	CRT3	49844	15	43.87	13	1.01972	0.000230467	26.4584	26.513	26.5524	27.5907	27.3402	27.652
TRNHB_ARATH	sp|F4IKM1|TRNHB_ARATH Tropinone reductase homolog At2g29340 OS=Arabidopsis thaliana OX=3702 GN=At2g29340 PE=2 SV=1	At2g29340	32900	8	41.37	7	1.00923	0.00376525	24.95	25.3257	24.7032	26.1715	25.713	26.1221
A0A178V5Z2_ARATH	tr|A0A178V5Z2|A0A178V5Z2_ARATH (thale cress) hypothetical protein OS=Arabidopsis thaliana OX=3702 GN=AXX17_At4g33040 PE=3 SV=1	AXX17_At4g33040	43359	10	38.86	9	1.00263	0.00306785	23.8551	24.512	23.867	25.0716	25.1221	25.0482
PDI54_ARATH	sp|Q9T042|PDI54_ARATH Protein disulfide-isomerase 5-4 OS=Arabidopsis thaliana OX=3702 GN=PDIL5-4 PE=2 SV=1	PDIL5-4	53893	7	17.71	6	1.00019	0.00128824	23.2351	22.7504	23.2317	24.1642	23.9629	24.0907
DRMH3_ARATH	sp|Q8LD26|DRMH3_ARATH Dormancy-associated protein homolog 3 OS=Arabidopsis thaliana OX=3702 GN=At1g56220 PE=1 SV=1	At1g56220	14518	1	9.49	1	-4.71797	3.6567e-06	26.5156	26.3869	26.0493	21.265	22.1467	21.3862
A0A178UAI9_ARATH	tr|A0A178UAI9|A0A178UAI9_ARATH FAD_binding_3 domain-containing protein OS=Arabidopsis thaliana OX=3702 GN=At5g11330 PE=4 SV=1	At5g11330	45764	7	25.25	5	-4.64425	2.98803e-07	24.1189	23.7805	23.5147	19.1438	19.1545	19.183
RAG3B_ARATH	sp|O04157|RAG3B_ARATH Ras-related protein RABG3b OS=Arabidopsis thaliana OX=3702 GN=RABG3B PE=1 SV=1	RABG3B	22945	8	50.74	3	-4.39848	3.59086e-07	23.2303	23.7945	23.6518	19.1438	19.1545	19.183
A0A384KRL7_ARATH	tr|A0A384KRL7|A0A384KRL7_ARATH (thale cress) hypothetical protein OS=Arabidopsis thaliana OX=3702 GN=At3g07810 PE=1 SV=1	At3g07810	51872	4	11.94	3	-4.07222	8.64615e-08	23.3584	23.2898	23.0496	19.1438	19.1545	19.183
TBL38_ARATH	sp|Q8VY22|TBL38_ARATH Protein trichome birefringence-like 38 OS=Arabidopsis thaliana OX=3702 GN=TBL38 PE=2 SV=1	TBL38	42709	5	16.58	3	-3.38302	8.17669e-05	23.296	21.9544	22.3799	19.1438	19.1545	19.183
A0A178U9W1_ARATH	tr|A0A178U9W1|A0A178U9W1_ARATH Uncharacterized protein OS=Arabidopsis thaliana OX=3702 GN=AXX17_At5g27180 PE=4 SV=1	AXX17_At5g27180	39482	3	8.96	2	-3.35178	6.90538e-05	22.6807	21.788	23.0679	19.1438	19.1545	19.183
PLY20_ARATH	sp|Q93WF1|PLY20_ARATH Probable pectate lyase 20 OS=Arabidopsis thaliana OX=3702 GN=At5g48900 PE=2 SV=1	At5g48900	46728	6	16.55	2	-3.30416	1.43422e-05	22.3268	22.9873	22.0797	19.1438	19.1545	19.183
VPS25_ARATH	sp|Q8VZC9|VPS25_ARATH Vacuolar protein sorting-associated protein 25 OS=Arabidopsis thaliana OX=3702 GN=VPS25 PE=1 SV=1	VPS25	20682	2	15.64	1	-3.24338	2.41393e-06	22.6707	22.0693	22.4714	19.1438	19.1545	19.183
GSTU7_ARATH	sp|Q9ZW24|GSTU7_ARATH Glutathione S-transferase U7 OS=Arabidopsis thaliana OX=3702 GN=GSTU7 PE=2 SV=1	GSTU7	26113	2	11.01	2	-3.15541	0.000760992	23.0229	21.1818	22.7428	19.1438	19.1545	19.183
RD29A_ARATH	sp|Q06738|RD29A_ARATH Low-temperature-induced 78 kDa protein OS=Arabidopsis thaliana OX=3702 GN=RD29A PE=1 SV=2	RD29A	77856	13	40.7	11	-3.15059	0.000490345	25.4579	25.2116	24.2693	22.5819	21.3899	21.5153
TAR4_ARATH	sp|Q93Z38|TAR4_ARATH Tryptophan aminotransferase-related protein 4 OS=Arabidopsis thaliana OX=3702 GN=TAR4 PE=2 SV=2	TAR4	52430	4	9.07	4	-3.12465	0.000339635	21.8624	21.7456	23.2472	19.1438	19.1545	19.183
GDT14_ARATH	sp|Q9C6M1|GDT14_ARATH GDT1-like protein 4 OS=Arabidopsis thaliana OX=3702 GN=At1g25520 PE=2 SV=1	At1g25520	24809	2	9.57	2	-3.11622	0.000167384	23.0612	22.1328	21.636	19.1438	19.1545	19.183
A0A178V019_ARATH	tr|A0A178V019|A0A178V019_ARATH PME1 OS=Arabidopsis thaliana OX=3702 GN=AXX17_At4g13940 PE=4 SV=1	AXX17_At4g13940	23105	1	5.34	1	-3.05403	5.19353e-06	22.5074	22.2939	21.8421	19.1438	19.1545	19.183
O65325_ARATH	tr|O65325|O65325_ARATH Superoxide dismutase copper chaperone OS=Arabidopsis thaliana OX=3702 GN=CCS1 PE=2 SV=1	CCS1	27348	3	18.75	1	-3.02877	1.63884e-05	22.6529	22.1252	21.7895	19.1438	19.1545	19.183
A0A7G2EQG8_ARATH	tr|A0A7G2EQG8|A0A7G2EQG8_ARATH (thale cress) hypothetical protein OS=Arabidopsis thaliana OX=3702 GN=AT9943_LOCUS12042 PE=3 SV=1	AT9943_LOCUS12042	162907	5	4.62	3	-3.02407	6.59229e-05	21.8303	22.8546	21.8686	19.1438	19.1545	19.183
SRG1_ARATH	sp|Q39224|SRG1_ARATH Protein SRG1 OS=Arabidopsis thaliana OX=3702 GN=SRG1 PE=2 SV=1	SRG1	41039	3	12.57	2	-2.94436	0.000692437	21.3637	21.8366	23.1141	19.1438	19.1545	19.183
PTI12_ARATH	sp|O49339|PTI12_ARATH PTI1-like tyrosine-protein kinase 2 OS=Arabidopsis thaliana OX=3702 GN=PTI12 PE=1 SV=1	PTI12	40500	11	38.25	5	-2.90974	8.65014e-06	23.4769	23.7748	23.7151	21.1188	20.5738	20.545
A0A178UTU2_ARATH	tr|A0A178UTU2|A0A178UTU2_ARATH Metalloenzyme domain-containing protein OS=Arabidopsis thaliana OX=3702 GN=AXX17_At4g10680 PE=3 SV=1	AXX17_At4g10680	53016	7	18.7	2	-2.84397	4.41922e-05	21.8643	22.5582	21.5907	19.1438	19.1545	19.183
A0A384LEC5_ARATH	tr|A0A384LEC5|A0A384LEC5_ARATH (thale cress) hypothetical protein OS=Arabidopsis thaliana OX=3702 GN=AXX17_At3g48390 PE=4 SV=1	AXX17_At3g48390	17794	23	84.38	23	-2.75648	1.25289e-06	31.2201	31.298	31.0139	28.4953	28.2741	28.4931
H2B3_ARATH	sp|Q9SI96|H2B3_ARATH Histone H2B.3 OS=Arabidopsis thaliana OX=3702 GN=At2g28720 PE=1 SV=3	At2g28720	16529	12	54.97	1	-2.73031	0.000220218	22.637	21.4012	22.3953	19.3283	19.5283	19.386
DEXHE_ARATH	sp|Q9FNQ1|DEXHE_ARATH DExH-box ATP-dependent RNA helicase DExH14 OS=Arabidopsis thaliana OX=3702 GN=BRR2C PE=2 SV=1	BRR2C	244528	3	2.46	2	-2.72359	0.00015633	23.8968	23.6237	23.2319	21.4512	20.6487	20.4817
CER2_ARATH	sp|Q39048|CER2_ARATH Protein ECERIFERUM 2 OS=Arabidopsis thaliana OX=3702 GN=CER2 PE=1 SV=1	CER2	47238	11	37.05	11	-2.70936	0.00229443	25.5395	25.736	25.4785	23.7929	23.1118	21.7212
NHL12_ARATH	sp|Q9SJ54|NHL12_ARATH NDR1/HIN1-like protein 12 OS=Arabidopsis thaliana OX=3702 GN=NHL12 PE=2 SV=1	NHL12	23263	2	7.14	1	-2.6931	7.4918e-05	21.8677	22.3693	21.3235	19.1438	19.1545	19.183
A0A178UH50_ARATH	tr|A0A178UH50|A0A178UH50_ARATH Uncharacterized protein OS=Arabidopsis thaliana OX=3702 GN=AXX17_At5g02060 PE=4 SV=1	AXX17_At5g02060	38803	3	11.33	2	-2.62867	2.19551e-06	21.6837	22.0346	21.649	19.1438	19.1545	19.183
A0A178UEC4_ARATH	tr|A0A178UEC4|A0A178UEC4_ARATH AB hydrolase-1 domain-containing protein OS=Arabidopsis thaliana OX=3702 GN=At5g25770 PE=4 SV=1	At5g25770	47238	1	2.87	1	-2.62772	5.04691e-05	21.4768	21.5616	22.326	19.1438	19.1545	19.183
RAA6A_ARATH	sp|Q9C9U7|RAA6A_ARATH Ras-related protein RABA6a OS=Arabidopsis thaliana OX=3702 GN=RABA6A PE=2 SV=1	RABA6A	26039	5	18.03	2	-2.60777	4.45394e-05	22.1428	21.8946	21.2671	19.1438	19.1545	19.183
LACS1_ARATH	sp|O22898|LACS1_ARATH Long chain acyl-CoA synthetase 1 OS=Arabidopsis thaliana OX=3702 GN=LACS1 PE=2 SV=1	LACS1	74598	2	4.09	2	-2.60115	2.88642e-06	21.5178	21.9703	21.7966	19.1438	19.1545	19.183
A0A178VHQ9_ARATH	tr|A0A178VHQ9|A0A178VHQ9_ARATH PUX1 OS=Arabidopsis thaliana OX=3702 GN=At3g27310 PE=4 SV=1	At3g27310	25990	2	15.22	2	-2.5068	2.40715e-05	21.6094	22.1724	21.5479	19.3591	19.3542	19.096
RR7_ARATH	sp|P61841|RR7_ARATH 30S ribosomal protein S7, chloroplastic OS=Arabidopsis thaliana OX=3702 GN=rps7-A PE=1 SV=1	rps7-A	17357	6	41.29	6	-2.45495	1.42922e-05	27.9257	27.7275	27.5207	25.5603	25.115	25.1337
FQRL3_ARATH	sp|Q9LUX9|FQRL3_ARATH Probable NAD(P)H dehydrogenase (quinone) FQR1-like 3 OS=Arabidopsis thaliana OX=3702 GN=At5g58800 PE=1 SV=1	At5g58800	22723	4	37.2	4	-2.44757	0.00013589	23.5352	22.5234	22.8528	20.4292	20.6684	20.4711
A0A384LL73_ARATH	tr|A0A384LL73|A0A384LL73_ARATH Uncharacterized protein OS=Arabidopsis thaliana OX=3702 GN=At3g57790 PE=3 SV=1	At3g57790	54099	4	8.57	4	-2.40648	7.9128e-05	23.6606	23.5213	24.3833	21.4981	21.4351	21.4126
Y5020_ARATH	sp|Q0WR59|Y5020_ARATH Probable inactive receptor kinase At5g10020 OS=Arabidopsis thaliana OX=3702 GN=At5g10020 PE=1 SV=2	At5g10020	114714	1	0.76	1	-2.28373	6.48942e-06	21.2071	21.4514	21.674	19.1438	19.1545	19.183
GDL2_ARATH	sp|O80522|GDL2_ARATH GDSL esterase/lipase At1g09390 OS=Arabidopsis thaliana OX=3702 GN=At1g09390 PE=2 SV=1	At1g09390	40477	2	5.68	2	-2.26654	5.15804e-05	21.8765	21.1489	21.2555	19.1438	19.1545	19.183
VPS2A_ARATH	sp|Q9SKI2|VPS2A_ARATH Vacuolar protein sorting-associated protein 2 homolog 1 OS=Arabidopsis thaliana OX=3702 GN=VPS2.1 PE=1 SV=2	VPS2.1	25292	2	14.67	2	-2.26595	2.80925e-05	23.9873	23.5236	23.56	21.5315	21.5747	21.1668
Y1390_ARATH	sp|Q681Q7|Y1390_ARATH Uncharacterized protein At1g03900 OS=Arabidopsis thaliana OX=3702 GN=At1g03900 PE=1 SV=1	At1g03900	29795	2	9.19	1	-2.16174	3.72932e-06	21.3594	21.1334	21.4736	19.1438	19.1545	19.183
BGAL5_ARATH	sp|Q9MAJ7|BGAL5_ARATH Beta-galactosidase 5 OS=Arabidopsis thaliana OX=3702 GN=BGAL5 PE=2 SV=1	BGAL5	81444	18	32.38	13	-2.06388	0.000286321	25.265	25.2013	25.3564	23.2219	22.6978	23.7113
A0A178WLS7_ARATH	tr|A0A178WLS7|A0A178WLS7_ARATH TPR3 OS=Arabidopsis thaliana OX=3702 GN=At1g04190 PE=4 SV=1	At1g04190	37180	5	16.77	4	-2.06308	0.00298573	24.596	24.274	24.6065	21.5361	23.1679	22.5832
Y3589_ARATH	sp|Q9LSC2|Y3589_ARATH PTI1-like tyrosine-protein kinase At3g15890 OS=Arabidopsis thaliana OX=3702 GN=At3g15890 PE=2 SV=1	At3g15890	40955	3	11.63	1	-2.06278	2.29947e-05	20.9032	21.4465	21.3199	19.1438	19.1545	19.183
A0A384KMU4_ARATH	tr|A0A384KMU4|A0A384KMU4_ARATH (thale cress) hypothetical protein OS=Arabidopsis thaliana OX=3702 GN=AXX17_At3g02600 PE=4 SV=1	AXX17_At3g02600	17439	7	73.58	6	-2.0593	1.08825e-05	25.0584	24.7006	25.0822	22.933	22.9399	22.7903
MSSP1_ARATH	sp|Q96290|MSSP1_ARATH Monosaccharide-sensing protein 1 OS=Arabidopsis thaliana OX=3702 GN=MSSP1 PE=1 SV=2	MSSP1	79485	2	5.86	2	-2.03007	6.79317e-05	23.1358	23.2437	22.6097	21.0872	20.8226	20.9891
COR47_ARATH	sp|P31168|COR47_ARATH Dehydrin COR47 OS=Arabidopsis thaliana OX=3702 GN=COR47 PE=1 SV=2	COR47	29897	9	59.25	7	-1.99164	4.13204e-05	26.4553	26.8551	26.8725	24.9652	24.6862	24.5566
A0A178UFK4_ARATH	tr|A0A178UFK4|A0A178UFK4_ARATH Uncharacterized protein OS=Arabidopsis thaliana OX=3702 GN=AXX17_At5g54340 PE=4 SV=1	AXX17_At5g54340	18538	3	19.64	3	-1.97719	0.00383322	23.6659	22.1876	22.2595	20.5262	20.9264	20.7288
ANXD4_ARATH	sp|Q9ZVJ6|ANXD4_ARATH Annexin D4 OS=Arabidopsis thaliana OX=3702 GN=ANN4 PE=1 SV=1	ANN4	36221	6	25.71	6	-1.95573	0.00496528	24.5569	24.6462	24.3265	22.9132	21.548	23.2012
CDC25_ARATH	sp|Q8GY31|CDC25_ARATH Dual specificity phosphatase Cdc25 OS=Arabidopsis thaliana OX=3702 GN=CDC25 PE=1 SV=1	CDC25	16450	2	19.86	2	-1.88661	0.00021254	23.036	23.4854	23.1083	21.7241	21.0325	21.2133
A0A178V9M8_ARATH	tr|A0A178V9M8|A0A178V9M8_ARATH Protein kinase domain-containing protein OS=Arabidopsis thaliana OX=3702 GN=AXX17_At3g29020 PE=3 SV=1	AXX17_At3g29020	41763	5	21.58	5	-1.88418	0.00122986	22.6464	22.5275	23.6222	20.834	21.239	21.0706
A0A178VKK8_ARATH	tr|A0A178VKK8|A0A178VKK8_ARATH Uncharacterized protein OS=Arabidopsis thaliana OX=3702 GN=AXX17_At3g04490 PE=3 SV=1	AXX17_At3g04490	19573	5	39.31	1	-1.84201	8.61677e-05	21.3062	21.0647	20.6364	19.1438	19.1545	19.183
DEGP9_ARATH	sp|Q9FL12|DEGP9_ARATH Protease Do-like 9 OS=Arabidopsis thaliana OX=3702 GN=DEGP9 PE=1 SV=1	DEGP9	65153	2	4.05	1	-1.79711	5.86568e-05	20.6334	21.2183	21.0209	19.1438	19.1545	19.183
A0A178VML7_ARATH	tr|A0A178VML7|A0A178VML7_ARATH Uncharacterized protein OS=Arabidopsis thaliana OX=3702 GN=At2g15320 PE=4 SV=1	At2g15320	41482	6	21.61	4	-1.7944	0.00114377	22.8468	22.9492	23.178	21.8512	20.8605	20.8792
APG2_ARATH	sp|Q9LU14|APG2_ARATH GDSL esterase/lipase APG OS=Arabidopsis thaliana OX=3702 GN=APG PE=2 SV=1	APG	38200	6	26.35	5	-1.78449	0.00135023	24.3486	23.4893	24.2579	22.0828	22.6882	21.9712
HIP25_ARATH	sp|O49613|HIP25_ARATH Heavy metal-associated isoprenylated plant protein 25 OS=Arabidopsis thaliana OX=3702 GN=HIPP25 PE=2 SV=1	HIPP25	17162	12	66.01	12	-1.775	1.93814e-05	27.9303	27.9371	27.7506	25.9037	26.1203	26.269
LACS3_ARATH	sp|Q9C7W4|LACS3_ARATH Long chain acyl-CoA synthetase 3 OS=Arabidopsis thaliana OX=3702 GN=LACS3 PE=2 SV=1	LACS3	74751	17	32.78	12	-1.76909	0.000128882	25.1506	25.6285	25.0256	23.3169	23.5893	23.5911
H2A4_ARATH	sp|Q9LZ46|H2A4_ARATH Probable histone H2A.4 OS=Arabidopsis thaliana OX=3702 GN=At5g02560 PE=1 SV=1	At5g02560	16218	2	17.65	2	-1.76773	2.884e-05	22.9152	22.8387	22.9517	21.3776	21.1079	20.9168
SRF7_ARATH	sp|Q9LUL4|SRF7_ARATH Protein STRUBBELIG-RECEPTOR FAMILY 7 OS=Arabidopsis thaliana OX=3702 GN=SRF7 PE=1 SV=1	SRF7	77635	4	9.48	3	-1.74673	0.000374809	23.2534	22.6103	22.5607	20.8311	21.2838	21.0694
A0A178WEM5_ARATH	tr|A0A178WEM5|A0A178WEM5_ARATH CYP94D1 OS=Arabidopsis thaliana OX=3702 GN=At1g34540 PE=3 SV=1	At1g34540	56825	1	2.01	1	-1.73047	4.66873e-06	20.9538	20.7821	20.9368	19.1438	19.1545	19.183
RL133_ARATH	sp|Q9FF90|RL133_ARATH 60S ribosomal protein L13-3 OS=Arabidopsis thaliana OX=3702 GN=RPL13D PE=1 SV=1	RPL13D	23485	9	45.63	3	-1.71121	2.37801e-05	24.8841	25.2683	25.1364	23.3183	23.4777	23.3593
ARL8B_ARATH	sp|Q93Y31|ARL8B_ARATH ADP-ribosylation factor-like protein 8b OS=Arabidopsis thaliana OX=3702 GN=ARL8B PE=2 SV=1	ARL8B	20404	9	63.59	3	-1.6852	0.000241924	23.4726	23.6672	23.5259	21.6915	22.3003	21.6184
EXO_ARATH	sp|Q9ZPE7|EXO_ARATH Protein EXORDIUM OS=Arabidopsis thaliana OX=3702 GN=EXO PE=2 SV=1	EXO	33599	3	13.06	3	-1.68233	0.00369666	23.1582	22.5191	23.9056	21.314	21.5676	21.6543
DSEL_ARATH	sp|O49523|DSEL_ARATH Phospholipase A1-IIgamma OS=Arabidopsis thaliana OX=3702 GN=DSEL PE=1 SV=1	DSEL	47792	4	14.08	4	-1.65739	0.00512563	24.4269	23.2021	24.016	22.277	22.6299	21.7659
Y3126_ARATH	sp|Q9M2D8|Y3126_ARATH Uncharacterized protein At3g61260 OS=Arabidopsis thaliana OX=3702 GN=At3g61260 PE=1 SV=1	At3g61260	23144	10	61.79	10	-1.65641	0.000148863	27.0895	27.0568	26.777	25.4439	25.5241	24.9861
RTNLF_ARATH	sp|Q6DBN4|RTNLF_ARATH Reticulon-like protein B6 OS=Arabidopsis thaliana OX=3702 GN=RTNLB6 PE=1 SV=1	RTNLB6	28816	1	5.53	1	-1.65164	2.06107e-05	20.6236	20.9976	20.815	19.1438	19.1545	19.183
VPS9A_ARATH	sp|Q9LT31|VPS9A_ARATH Vacuolar protein sorting-associated protein 9A OS=Arabidopsis thaliana OX=3702 GN=VPS9A PE=1 SV=1	VPS9A	57898	6	21.15	4	-1.63399	0.00104839	23.7994	23.5775	23.3982	22.0457	22.3897	21.4379
MEX1_ARATH	sp|Q9LF50|MEX1_ARATH Maltose excess protein 1, chloroplastic OS=Arabidopsis thaliana OX=3702 GN=MEX1 PE=2 SV=2	MEX1	45280	2	9.16	1	-1.61964	7.30568e-05	20.5147	21.0557	20.7698	19.1438	19.1545	19.183
A0A178VSX5_ARATH	tr|A0A178VSX5|A0A178VSX5_ARATH Uncharacterized protein OS=Arabidopsis thaliana OX=3702 GN=AXX17_At2g44610 PE=3 SV=1	AXX17_At2g44610	71421	6	14.83	6	-1.59563	0.0032067	22.5517	22.3915	23.5191	21.4241	20.9622	21.2891
PAE2_ARATH	sp|F4I839|PAE2_ARATH Pectin acetylesterase 2 OS=Arabidopsis thaliana OX=3702 GN=PAE2 PE=2 SV=1	PAE2	49915	7	16.89	4	-1.56559	5.91057e-05	22.4991	22.564	22.9344	21.0491	21.0882	21.1635
E1313_ARATH	sp|Q9FJU9|E1313_ARATH Glucan endo-1,3-beta-glucosidase 13 OS=Arabidopsis thaliana OX=3702 GN=At5g56590 PE=2 SV=1	At5g56590	55604	5	12.25	5	-1.54195	0.00195992	23.5562	22.9728	23.4385	21.585	22.3183	21.4384
XTH32_ARATH	sp|Q9SJL9|XTH32_ARATH Probable xyloglucan endotransglucosylase/hydrolase protein 32 OS=Arabidopsis thaliana OX=3702 GN=XTH32 PE=2 SV=1	XTH32	34482	19	52.51	18	-1.52617	1.60306e-05	27.6438	27.5548	27.7375	26.2314	26.1008	26.0255
SBT11_ARATH	sp|Q84WS0|SBT11_ARATH Subtilisin-like protease SBT1.1 OS=Arabidopsis thaliana OX=3702 GN=SBTI1.1 PE=1 SV=1	SBTI1.1	83247	11	24.29	10	-1.5142	0.00167003	26.0734	25.522	25.6243	24.7145	24.1153	23.8472
2A5N_ARATH	sp|Q9LU89|2A5N_ARATH Serine/threonine protein phosphatase 2A 59 kDa regulatory subunit B' eta isoform OS=Arabidopsis thaliana OX=3702 GN=B'ETA PE=1 SV=1	B'ETA	58758	4	8.43	2	-1.45578	0.000396177	21.8871	21.5546	21.4831	19.9864	20.5198	20.0513
PLY22_ARATH	sp|Q93Z25|PLY22_ARATH Probable pectate lyase 22 OS=Arabidopsis thaliana OX=3702 GN=At5g63180 PE=2 SV=1	At5g63180	47895	6	24.31	4	-1.41885	0.000772069	23.9717	24.6903	24.5775	22.9329	23.1576	22.8925
AB1K3_ARATH	sp|Q9MA15|AB1K3_ARATH Protein ACTIVITY OF BC1 COMPLEX KINASE 3, chloroplastic OS=Arabidopsis thaliana OX=3702 GN=ABC1K3 PE=1 SV=1	ABC1K3	79022	13	24.05	10	-1.39433	0.00392488	24.9971	25.2778	25.0016	23.9528	24.0952	23.0455
CUT1C_ARATH	sp|Q9M812|CUT1C_ARATH Protein CURVATURE THYLAKOID 1C, chloroplastic OS=Arabidopsis thaliana OX=3702 GN=CURT1C PE=1 SV=1	CURT1C	16946	5	31.41	5	-1.34853	0.00153488	25.3274	24.5442	24.5672	23.4822	23.5521	23.3589
BGAL2_ARATH	sp|Q9LFA6|BGAL2_ARATH Beta-galactosidase 2 OS=Arabidopsis thaliana OX=3702 GN=BGAL2 PE=2 SV=2	BGAL2	82015	24	46.35	16	-1.29697	0.00335304	25.8775	25.8766	26.4035	24.2644	24.9487	25.0535
A0A1P8BH65_ARATH	tr|A0A1P8BH65|A0A1P8BH65_ARATH ENHANCED DISEASE RESISTANCE protein (DUF1336) OS=Arabidopsis thaliana OX=3702 GN=At5g35180 PE=1 SV=1	At5g35180	87549	13	24.42	10	-1.2909	0.00304373	25.1891	24.5351	24.6256	23.8764	23.1437	23.457
THO4C_ARATH	sp|Q94EH8|THO4C_ARATH THO complex subunit 4C OS=Arabidopsis thaliana OX=3702 GN=ALY3 PE=1 SV=1	ALY3	31318	4	21.69	4	-1.2899	4.94432e-05	23.0115	23.2461	23.205	21.8498	21.9579	21.7851
PLPD1_ARATH	sp|A8MS68|PLPD1_ARATH Dihydrolipoyl dehydrogenase 1, chloroplastic OS=Arabidopsis thaliana OX=3702 GN=LPD1 PE=2 SV=1	LPD1	66661	16	40.13	6	-1.28238	0.000634577	24.6211	24.4554	24.375	23.0217	23.5728	23.0099
CLCC_ARATH	sp|Q96282|CLCC_ARATH Chloride channel protein CLC-c OS=Arabidopsis thaliana OX=3702 GN=CLC-C PE=1 SV=1	CLC-C	85232	7	11.81	7	-1.26596	0.0011055	24.8455	25.1154	24.5522	23.2675	23.7834	23.6644
PAL2_ARATH	sp|P45724|PAL2_ARATH Phenylalanine ammonia-lyase 2 OS=Arabidopsis thaliana OX=3702 GN=PAL2 PE=1 SV=2	PAL2	77860	44	69.04	21	-1.25574	0.00185203	26.8544	26.5834	26.8763	25.3978	25.1806	25.9686
AMERL_ARATH	sp|Q9ZVJ2|AMERL_ARATH Uncharacterized protein At2g38710 OS=Arabidopsis thaliana OX=3702 GN=At2g38710 PE=2 SV=1	At2g38710	24245	4	22.43	3	-1.23603	0.00211933	22.4402	22.6561	23.2626	21.6642	21.4148	21.5719
A0A7G2E4R2_ARATH	tr|A0A7G2E4R2|A0A7G2E4R2_ARATH Carbonic anhydrase OS=Arabidopsis thaliana OX=3702 GN=AT9943_LOCUS5135 PE=3 SV=1	AT9943_LOCUS5135	29982	21	78.97	1	-1.23487	0.000138603	22.7709	22.8381	22.5931	21.3065	21.609	21.5819
BGAL6_ARATH	sp|Q9FFN4|BGAL6_ARATH Beta-galactosidase 6 OS=Arabidopsis thaliana OX=3702 GN=BGAL6 PE=2 SV=1	BGAL6	79759	22	48.19	20	-1.23376	0.00176713	26.2875	26.2328	26.0314	24.4866	25.2097	25.1541
A0A178VG92_ARATH	tr|A0A178VG92|A0A178VG92_ARATH Pyr_redox_2 domain-containing protein OS=Arabidopsis thaliana OX=3702 GN=AXX17_At3g37740 PE=4 SV=1	AXX17_At3g37740	40101	2	5.18	2	-1.23058	0.00359591	22.4503	22.6699	22.6589	21.7214	20.8072	21.5587
HP302_ARATH	sp|Q9FLT9|HP302_ARATH Chloroplastic import inner membrane translocase subunit HP30-2 OS=Arabidopsis thaliana OX=3702 GN=HP30-2 PE=1 SV=1	HP30-2	27772	5	25.48	5	-1.22851	0.00209954	24.3553	24.5878	23.9692	22.8167	23.4196	22.9904
ERD10_ARATH	sp|P42759|ERD10_ARATH Dehydrin ERD10 OS=Arabidopsis thaliana OX=3702 GN=ERD10 PE=1 SV=1	ERD10	29548	5	23.46	5	-1.2161	0.00307888	24.7691	24.7221	24.957	23.9797	23.7338	23.0865
A0A178W3V3_ARATH	tr|A0A178W3V3|A0A178W3V3_ARATH HTH TFE/IIEalpha-type domain-containing protein OS=Arabidopsis thaliana OX=3702 GN=AXX17_At1g02520 PE=3 SV=1	AXX17_At1g02520	61077	2	5.54	1	-1.19873	6.47211e-05	20.2035	20.3945	20.4794	19.1438	19.1545	19.183
A0A178UXV4_ARATH	tr|A0A178UXV4|A0A178UXV4_ARATH (thale cress) hypothetical protein OS=Arabidopsis thaliana OX=3702 GN=AXX17_At4g44030 PE=4 SV=1	AXX17_At4g44030	36290	9	44.34	9	-1.17171	0.00288696	25.1948	25.134	24.5457	23.5514	24.0848	23.7232
RICE1_ARATH	sp|Q9SF21|RICE1_ARATH Protein RISC-INTERACTING CLEARING 3'-5' EXORIBONUCLEASE 1 OS=Arabidopsis thaliana OX=3702 GN=RICE1 PE=1 SV=1	RICE1	22956	7	44.5	6	-1.16608	0.00354333	25.8434	25.7604	25.9363	24.5754	24.2796	25.1868
A0A178WFZ1_ARATH	tr|A0A178WFZ1|A0A178WFZ1_ARATH (thale cress) hypothetical protein OS=Arabidopsis thaliana OX=3702 GN=At1g77700 PE=4 SV=1	At1g77700	30585	3	13.78	3	-1.16343	0.00248784	22.7945	22.3008	23.0311	21.5008	21.3562	21.7791
DR102_ARATH	sp|Q05212|DR102_ARATH DNA damage-repair/toleration protein DRT102 OS=Arabidopsis thaliana OX=3702 GN=DRT102 PE=1 SV=2	DRT102	33233	10	48.06	9	-1.16035	0.000117018	26.0681	26.3056	26.1483	25.0899	24.8705	25.0807
REMO_ARATH	sp|O80837|REMO_ARATH Remorin OS=Arabidopsis thaliana OX=3702 GN=DBP PE=1 SV=1	DBP	20968	14	64.21	13	-1.15945	0.00260596	26.9239	26.9726	26.3016	25.468	25.8247	25.4271
SBT4E_ARATH	sp|Q9LLL8|SBT4E_ARATH Subtilisin-like protease SBT4.14 OS=Arabidopsis thaliana OX=3702 GN=SBT4.14 PE=2 SV=1	SBT4.14	80329	24	38.18	21	-1.15802	0.00156065	27.3081	27.4833	26.8246	25.9701	26.2403	25.9315
LUP1_ARATH	sp|Q9C5M3|LUP1_ARATH Lupeol synthase 1 OS=Arabidopsis thaliana OX=3702 GN=LUP1 PE=1 SV=1	LUP1	87352	15	25.23	11	-1.15527	0.000617216	25.1401	25.0559	24.8161	23.5663	23.9812	23.9988
FLA9_ARATH	sp|Q9ZWA8|FLA9_ARATH Fasciclin-like arabinogalactan protein 9 OS=Arabidopsis thaliana OX=3702 GN=FLA9 PE=2 SV=1	FLA9	26115	5	19.43	4	-1.1533	0.000927512	25.6388	26.0543	25.4809	24.7406	24.4994	24.4741
PLAT2_ARATH	sp|Q9SIE7|PLAT2_ARATH PLAT domain-containing protein 2 OS=Arabidopsis thaliana OX=3702 GN=PLAT2 PE=2 SV=1	PLAT2	20130	6	40.44	6	-1.1382	0.000107959	28.6496	28.4801	28.5764	27.547	27.4622	27.2823
GDL61_ARATH	sp|Q9M153|GDL61_ARATH GDSL esterase/lipase At4g01130 OS=Arabidopsis thaliana OX=3702 GN=At4g01130 PE=2 SV=1	At4g01130	42013	3	8.64	3	-1.13626	0.00485189	23.766	22.8743	23.5862	22.1023	22.3682	22.3471
GGLO3_ARATH	sp|Q9LYD8|GGLO3_ARATH L-gulonolactone oxidase 3 OS=Arabidopsis thaliana OX=3702 GN=GULLO3 PE=1 SV=1	GULLO3	64961	7	15.04	7	-1.1321	0.00130285	24.4388	24.7006	24.4931	23.7788	23.2955	23.162
A0A384LPW6_ARATH	tr|A0A384LPW6|A0A384LPW6_ARATH (thale cress) hypothetical protein OS=Arabidopsis thaliana OX=3702 GN=At3g60810 PE=4 SV=1	At3g60810	24566	3	22.43	2	-1.1198	0.000186578	22.7762	22.7875	23.116	21.7687	21.7708	21.7809
CADH4_ARATH	sp|P48523|CADH4_ARATH Cinnamyl alcohol dehydrogenase 4 OS=Arabidopsis thaliana OX=3702 GN=CAD4 PE=1 SV=1	CAD4	39098	14	55.34	12	-1.11372	0.00185294	26.2369	25.5786	26.1757	24.7633	24.9385	24.9482
TYRA2_ARATH	sp|Q9LMR3|TYRA2_ARATH Arogenate dehydrogenase 2, chloroplastic OS=Arabidopsis thaliana OX=3702 GN=TYRAAT2 PE=1 SV=1	TYRAAT2	40633	3	10.06	3	-1.10991	0.000399959	22.762	22.6364	22.6595	21.5484	21.3542	21.8256
FLA13_ARATH	sp|Q9FFH6|FLA13_ARATH Fasciclin-like arabinogalactan protein 13 OS=Arabidopsis thaliana OX=3702 GN=FLA13 PE=1 SV=1	FLA13	26205	8	28.74	8	-1.1067	0.001077	27.1667	27.0838	26.5797	25.9115	25.7714	25.8273
PME61_ARATH	sp|Q9FK05|PME61_ARATH Probable pectinesterase/pectinesterase inhibitor 61 OS=Arabidopsis thaliana OX=3702 GN=PME61 PE=2 SV=1	PME61	64241	14	28.28	14	-1.09957	0.000330655	27.4867	27.7376	27.3198	26.4244	26.3227	26.4983
GDL15_ARATH	sp|Q9C7N4|GDL15_ARATH GDSL esterase/lipase At1g29670 OS=Arabidopsis thaliana OX=3702 GN=At1g29670 PE=2 SV=1	At1g29670	39872	25	79.61	24	-1.09874	8.45999e-05	29.3953	29.3186	29.4693	28.2082	28.2711	28.4076
A0A178US69_ARATH	tr|A0A178US69|A0A178US69_ARATH (thale cress) hypothetical protein OS=Arabidopsis thaliana OX=3702 GN=AXX17_At5g16160 PE=4 SV=1	AXX17_At5g16160	26625	4	19.28	3	-1.09676	0.00135916	22.7455	22.2575	22.8562	21.5268	21.3965	21.6457
TL1Y_ARATH	sp|Q9SW33|TL1Y_ARATH Thylakoid lumenal 17.9 kDa protein, chloroplastic OS=Arabidopsis thaliana OX=3702 GN=At4g24930 PE=1 SV=1	At4g24930	24695	6	26.22	6	-1.07579	0.000130713	25.1276	25.281	25.1051	24.2116	24.0972	23.9776
A0A7G2ENB3_ARATH	tr|A0A7G2ENB3|A0A7G2ENB3_ARATH (thale cress) hypothetical protein OS=Arabidopsis thaliana OX=3702 GN=AT9943_LOCUS10455 PE=4 SV=1	AT9943_LOCUS10455	48892	5	13.44	2	-1.06424	0.00364376	22.9771	22.51	22.492	21.9281	21.2798	21.5784
ERD14_ARATH	sp|P42763|ERD14_ARATH Dehydrin ERD14 OS=Arabidopsis thaliana OX=3702 GN=ERD14 PE=1 SV=1	ERD14	20786	17	62.7	17	-1.05527	0.00126798	28.7298	29.0523	28.9797	28.1771	27.7164	27.7025
A0A178UDL6_ARATH	tr|A0A178UDL6|A0A178UDL6_ARATH GOLD domain-containing protein OS=Arabidopsis thaliana OX=3702 GN=At5g01010 PE=1 SV=1	At5g01010	50433	12	30.82	10	-1.05526	0.00329995	24.3057	23.7821	24.5025	23.3343	23.0888	23.0014
A0A5S9XRL0_ARATH	tr|A0A5S9XRL0|A0A5S9XRL0_ARATH Non-lysosomal glucosylceramidase OS=Arabidopsis thaliana OX=3702 GN=C24_LOCUS17486 PE=3 SV=1	C24_LOCUS17486	104365	16	22.34	14	-1.03402	0.00145303	25.913	26.3791	25.9154	24.9183	24.9479	25.2392
EXP11_ARATH	sp|Q9LNU3|EXP11_ARATH Expansin-A11 OS=Arabidopsis thaliana OX=3702 GN=EXPA11 PE=2 SV=1	EXPA11	26761	3	14.29	2	-1.02187	0.000306719	23.4884	23.7268	23.6732	22.6666	22.7169	22.4392
A0A178W6R0_ARATH	tr|A0A178W6R0|A0A178W6R0_ARATH (thale cress) hypothetical protein OS=Arabidopsis thaliana OX=3702 GN=At1g68300 PE=4 SV=1	At1g68300	17332	8	80.62	7	-1.01687	0.00358954	24.6853	24.7917	25.107	24.121	23.4714	23.9411
PCAP1_ARATH	sp|Q96262|PCAP1_ARATH Plasma membrane-associated cation-binding protein 1 OS=Arabidopsis thaliana OX=3702 GN=PCAP1 PE=1 SV=1	PCAP1	24584	14	60	14	-1.00608	0.000423925	29.8523	29.8928	29.5399	28.8312	28.6612	28.7744
POT13_ARATH	sp|Q8LPL8|POT13_ARATH Potassium transporter 13 OS=Arabidopsis thaliana OX=3702 GN=POT13 PE=1 SV=1	POT13	94738	4	4.56	4	-1.00176	0.000184841	23.3606	23.603	23.3579	22.4872	22.3938	22.4352
BGL22_ARATH	sp|Q9C8Y9|BGL22_ARATH Beta-glucosidase 22 OS=Arabidopsis thaliana OX=3702 GN=BGLU22 PE=1 SV=1	BGLU22	59781	6	13.36	4	4.39628	0.00532121	19.1248	19.1117	19.0946	25.8698	22.7444	21.9057
EGY1_ARATH	sp|Q949Y5|EGY1_ARATH Probable zinc metalloprotease EGY1, chloroplastic OS=Arabidopsis thaliana OX=3702 GN=EGY1 PE=2 SV=1	EGY1	59501	3	13.32	2	4.00723	0.0957889	15.7135	23.237	16.7851	21.518	22.9471	23.2921
CTPA2_ARATH	sp|O23614|CTPA2_ARATH Carboxyl-terminal-processing peptidase 2, chloroplastic OS=Arabidopsis thaliana OX=3702 GN=CTPA2 PE=1 SV=1	CTPA2	55763	4	9.51	3	3.03723	1	21.9957	20.8738	22.0111	24.686	24.5895	24.7167
CESA3_ARATH	sp|Q941L0|CESA3_ARATH Cellulose synthase A catalytic subunit 3 [UDP-forming] OS=Arabidopsis thaliana OX=3702 GN=CESA3 PE=1 SV=2	CESA3	119683	8	8.45	4	2.96535	0.0447799	20.7864	17.0829	21.2626	23.4056	21.9511	22.6712
PANB2_ARATH	sp|Q9M315|PANB2_ARATH 3-methyl-2-oxobutanoate hydroxymethyltransferase 2, mitochondrial OS=Arabidopsis thaliana OX=3702 GN=KPHMT2 PE=1 SV=1	KPHMT2	37364	4	20.62	4	2.76286	0.0595908	21.2551	22.3441	17.7692	23.4535	23.5653	22.6382
A0A178U7R3_ARATH	tr|A0A178U7R3|A0A178U7R3_ARATH Bulb-type lectin domain-containing protein OS=Arabidopsis thaliana OX=3702 GN=AXX17_At5g18260 PE=4 SV=1	AXX17_At5g18260	45808	8	32.69	8	2.73537	0.00808821	23.0956	21.9913	24.7871	26.142	25.8173	26.1209
SAC9_ARATH	sp|Q7XZU0|SAC9_ARATH Probable phosphoinositide phosphatase SAC9 OS=Arabidopsis thaliana OX=3702 GN=SAC9 PE=1 SV=1	SAC9	180063	14	11.29	10	2.5778	0.0172709	19.9247	23.0495	21.7699	23.8122	24.4755	24.1898
A0A1P8B8B4_ARATH	tr|A0A1P8B8B4|A0A1P8B8B4_ARATH TolB protein-like protein OS=Arabidopsis thaliana OX=3702 GN=At4g01870 PE=1 SV=1	At4g01870	78420	10	29.53	8	2.55143	0.00867361	20.5894	23.1334	22.1625	24.459	24.1448	24.9358
PGM_ARATH	sp|Q8GY96|PGM_ARATH Phosphoglycerate mutase-like protein OS=Arabidopsis thaliana OX=3702 GN=PGM PE=2 SV=1	PGM	29890	7	38.38	5	2.39099	0.00867877	23.1633	21.2045	21.2012	23.6136	24.5751	24.5533
A0A178UR18_ARATH	tr|A0A178UR18|A0A178UR18_ARATH DSBA domain-containing protein OS=Arabidopsis thaliana OX=3702 GN=At5g38900 PE=4 SV=1	At5g38900	24161	4	28.11	2	2.32955	0.0192406	20.8509	20.2726	20.8282	21.8325	24.6137	22.4942
A0A7G2FL77_ARATH	tr|A0A7G2FL77|A0A7G2FL77_ARATH (thale cress) hypothetical protein OS=Arabidopsis thaliana OX=3702 GN=AT9943_LOCUS21626 PE=3 SV=1	AT9943_LOCUS21626	115432	16	15.72	9	2.29316	0.0114706	23.8933	21.6372	21.8622	24.8652	24.3776	25.0294
GOGC1_ARATH	sp|Q8S8N9|GOGC1_ARATH Golgin candidate 1 OS=Arabidopsis thaliana OX=3702 GN=GC1 PE=2 SV=2	GC1	79180	4	8.49	3	2.26967	0.0222471	20.077	20.9163	21.3315	22.4952	24.5978	22.0408
FLA7_ARATH	sp|Q9SJ81|FLA7_ARATH Fasciclin-like arabinogalactan protein 7 OS=Arabidopsis thaliana OX=3702 GN=FLA7 PE=2 SV=1	FLA7	26846	2	14.17	2	2.23024	1	20.8907	21.2527	21.0404	23.1329	23.4603	23.2813
GCS1_ARATH	sp|F4HTM3|GCS1_ARATH Mannosyl-oligosaccharide glucosidase GCS1 OS=Arabidopsis thaliana OX=3702 GN=GCS1 PE=1 SV=1	GCS1	97634	4	7.98	2	2.17657	0.058891	19.9339	20.062	20.0908	22.8761	23.6913	20.0489
RLK90_ARATH	sp|Q9LVI6|RLK90_ARATH Probable inactive receptor kinase RLK902 OS=Arabidopsis thaliana OX=3702 GN=RLK902 PE=1 SV=1	RLK902	70406	7	14.22	5	2.1546	0.0940766	23.8662	22.0039	19.6381	24.1878	24.5484	23.2358
CYP22_ARATH	sp|Q9ZVJ4|CYP22_ARATH Peptidyl-prolyl cis-trans isomerase CYP22 OS=Arabidopsis thaliana OX=3702 GN=CYP22 PE=2 SV=1	CYP22	21492	3	18.09	1	2.1459	0.0203612	24.7512	22.423	22.3097	25.102	25.3674	25.4522
EIN2_ARATH	sp|Q9S814|EIN2_ARATH Ethylene-insensitive protein 2 OS=Arabidopsis thaliana OX=3702 GN=EIN2 PE=1 SV=1	EIN2	140956	4	5.41	2	2.12228	1	21.9318	21.7609	21.1504	23.7841	23.6782	23.7476
BCAL2_ARATH	sp|Q9ASR4|BCAL2_ARATH Branched-chain-amino-acid aminotransferase-like protein 2 OS=Arabidopsis thaliana OX=3702 GN=At5g27410 PE=2 SV=1	At5g27410	62896	11	28.44	7	2.11831	0.0439027	23.2613	21.0605	24.3993	25.118	24.9499	25.0082
APY2_ARATH	sp|Q9SPM5|APY2_ARATH Apyrase 2 OS=Arabidopsis thaliana OX=3702 GN=APY2 PE=1 SV=1	APY2	51599	5	15.89	4	2.06745	0.00958601	22.0186	21.0273	23.1643	24.1973	24.3975	23.8177
A0A384L5D5_ARATH	tr|A0A384L5D5|A0A384L5D5_ARATH Pyruvate kinase OS=Arabidopsis thaliana OX=3702 GN=At5g08570 PE=3 SV=1	At5g08570	54977	19	46.47	4	2.06662	0.00936355	21.3495	23.5235	22.1879	24.4334	24.5291	24.2983
ALA3_ARATH	sp|Q9XIE6|ALA3_ARATH Phospholipid-transporting ATPase 3 OS=Arabidopsis thaliana OX=3702 GN=ALA3 PE=1 SV=2	ALA3	137753	3	3.63	2	2.06306	0.190089	21.6131	16.7329	21.7248	21.793	21.9312	22.5359
CHIB_ARATH	sp|P19171|CHIB_ARATH Basic endochitinase B OS=Arabidopsis thaliana OX=3702 GN=CHI-B PE=1 SV=3	CHI-B	36184	7	38.81	6	1.98501	0.0320396	21.4555	22.7567	24.078	25.4441	24.5597	24.2414
HS702_ARATH	sp|P22954|HS702_ARATH Heat shock 70 kDa protein 2 OS=Arabidopsis thaliana OX=3702 GN=HSP70-2 PE=1 SV=2	HSP70-2	71387	47	60.03	13	1.93146	0.0195932	25.1241	25.0601	24.8586	28.342	26.0333	26.4619
FTSI5_ARATH	sp|F4J3N2|FTSI5_ARATH Probable inactive ATP-dependent zinc metalloprotease FTSHI 5, chloroplastic OS=Arabidopsis thaliana OX=3702 GN=FTSHI5 PE=2 SV=1	FTSHI5	152258	3	3.33	2	1.91432	0.122452	20.517	22.3881	18.886	22.9709	21.0335	23.5296
MSR2_ARATH	sp|Q0WPA5|MSR2_ARATH Protein MANNAN SYNTHESIS-RELATED 2 OS=Arabidopsis thaliana OX=3702 GN=MSR2 PE=2 SV=1	MSR2	47142	14	38.53	9	1.87708	0.0512695	24.1132	21.5262	24.3463	25.2843	24.9922	25.3404
PMTT_ARATH	sp|Q9C9Q8|PMTT_ARATH Probable pectin methyltransferase QUA2 OS=Arabidopsis thaliana OX=3702 GN=QUA2 PE=1 SV=2	QUA2	77897	4	7.6	3	1.87018	0.1187	21.3255	20.9808	21.2523	22.369	21.3838	25.4164
A0A178UAN0_ARATH	tr|A0A178UAN0|A0A178UAN0_ARATH Ubiquitin-like domain-containing protein OS=Arabidopsis thaliana OX=3702 GN=AXX17_At5g40020 PE=4 SV=1	AXX17_At5g40020	92553	7	11.6	5	1.8063	0.451771	23.4723	15.505	22.9842	21.0071	23.3956	22.9776
A0A654G7N9_ARATH	tr|A0A654G7N9|A0A654G7N9_ARATH Uncharacterized protein OS=Arabidopsis thaliana OX=3702 GN=AN1_LOCUS24211 PE=4 SV=1	AN1_LOCUS24211	78584	1	1.03	1	1.80427	0.033367	15.8336	15.4528	17.6302	18.4565	18.5134	17.3596
HMT3_ARATH	sp|Q8LAX0|HMT3_ARATH Homocysteine S-methyltransferase 3 OS=Arabidopsis thaliana OX=3702 GN=HMT3 PE=1 SV=2	HMT3	37882	8	27.95	8	1.79661	0.100984	23.7556	20.7744	24.1754	24.8357	24.2231	25.0363
COB21_ARATH	sp|Q9CAA0|COB21_ARATH Coatomer subunit beta'-1 OS=Arabidopsis thaliana OX=3702 GN=At1g79990 PE=2 SV=2	At1g79990	103969	20	29.57	10	1.76615	0.0286123	24.0942	24.4419	22.3992	25.3786	24.8249	26.0303
MIK2_ARATH	sp|Q8VZG8|MIK2_ARATH MDIS1-interacting receptor like kinase 2 OS=Arabidopsis thaliana OX=3702 GN=MIK2 PE=1 SV=3	MIK2	115423	6	6.6	6	1.74782	0.00763305	23.2036	21.5484	22.7806	24.0427	24.4314	24.3019
CRK3_ARATH	sp|Q9CAL2|CRK3_ARATH Cysteine-rich receptor-like protein kinase 3 OS=Arabidopsis thaliana OX=3702 GN=CRK3 PE=2 SV=1	CRK3	71611	8	21.36	6	1.74565	0.0399138	21.1462	21.8605	21.2333	23.0698	21.9061	24.501
STL2_ARATH	sp|Q9SCN0|STL2_ARATH Probable glycosyltransferase STELLO2 OS=Arabidopsis thaliana OX=3702 GN=STL2 PE=1 SV=1	STL2	87660	7	14.64	7	1.72659	0.014497	23.9588	21.9549	22.8462	24.6665	24.8106	24.4626
A0A178V8P2_ARATH	tr|A0A178V8P2|A0A178V8P2_ARATH PfkB domain-containing protein OS=Arabidopsis thaliana OX=3702 GN=AXX17_At3g53900 PE=3 SV=1	AXX17_At3g53900	35009	10	38.65	2	1.71844	0.0453759	19.7537	20.7038	21.4171	22.7317	23.2056	21.0926
A0A178WH31_ARATH	tr|A0A178WH31|A0A178WH31_ARATH Endoplasmic reticulum transmembrane protein OS=Arabidopsis thaliana OX=3702 GN=AXX17_At1g12270 PE=3 SV=1	AXX17_At1g12270	25364	3	19	3	1.70578	0.0183551	19.625	21.2871	21.6206	22.5479	22.5329	22.5692
A0A178UL69_ARATH	tr|A0A178UL69|A0A178UL69_ARATH Uncharacterized protein OS=Arabidopsis thaliana OX=3702 GN=At5g23575 PE=4 SV=1	At5g23575	68664	4	8.26	2	1.70092	0.327115	19.8967	17.5503	18.1851	21.8599	16.7148	22.1601
STP4_ARATH	sp|Q39228|STP4_ARATH Sugar transport protein 4 OS=Arabidopsis thaliana OX=3702 GN=STP4 PE=1 SV=1	STP4	57095	3	8.95	3	1.69129	0.0105945	21.3235	22.198	22.8588	23.2361	24.1732	24.0448
GPDL1_ARATH	sp|Q7Y208|GPDL1_ARATH Glycerophosphodiester phosphodiesterase GDPDL1 OS=Arabidopsis thaliana OX=3702 GN=GDPDL1 PE=1 SV=2	GDPDL1	83788	15	28.18	14	1.66598	0.118845	24.4747	25.1858	23.2509	27.494	26.118	24.2973
A0A7G2ESV9_ARATH	tr|A0A7G2ESV9|A0A7G2ESV9_ARATH (thale cress) hypothetical protein OS=Arabidopsis thaliana OX=3702 GN=AT9943_LOCUS12090 PE=3 SV=1	AT9943_LOCUS12090	108704	10	12.11	6	1.64512	0.0233701	23.1593	21.174	22.5902	24.3683	23.9215	23.5691
UPL1_ARATH	sp|Q8GY23|UPL1_ARATH E3 ubiquitin-protein ligase UPL1 OS=Arabidopsis thaliana OX=3702 GN=UPL1 PE=1 SV=3	UPL1	405000	13	4.92	12	1.64501	0.254062	23.8808	23.5336	19.3142	24.1293	22.9157	24.6188
A0A178U862_ARATH	tr|A0A178U862|A0A178U862_ARATH Uncharacterized protein OS=Arabidopsis thaliana OX=3702 GN=At5g10050 PE=3 SV=1	At5g10050	30659	2	8.96	2	1.64162	0.0204374	20.1939	21.5409	21.9721	22.3108	23.0331	23.2879
EDS1C_ARATH	sp|Q9SU72|EDS1C_ARATH Protein EDS1 OS=Arabidopsis thaliana OX=3702 GN=EDS1 PE=1 SV=1	EDS1	71690	19	35.47	16	1.62357	0.0271364	23.175	25.1235	25.0282	26.0745	26.319	25.8039
A0A178V623_ARATH	tr|A0A178V623|A0A178V623_ARATH CYP72A8 OS=Arabidopsis thaliana OX=3702 GN=AXX17_At3g15260 PE=3 SV=1	AXX17_At3g15260	58673	4	13.59	3	1.62289	0.0279517	21.1533	20.4539	22.5632	23.3097	23.1341	22.5953
A0A384LJJ6_ARATH	tr|A0A384LJJ6|A0A384LJJ6_ARATH (thale cress) hypothetical protein OS=Arabidopsis thaliana OX=3702 GN=At3g07640 PE=4 SV=1	At3g07640	27028	3	24.48	3	1.61941	0.0175909	21.4466	21.1707	20.4409	23.461	21.7513	22.7041
A0A178W0X1_ARATH	tr|A0A178W0X1|A0A178W0X1_ARATH Protein kinase domain-containing protein OS=Arabidopsis thaliana OX=3702 GN=AXX17_At2g33830 PE=4 SV=1	AXX17_At2g33830	103567	7	8.46	7	1.60413	0.151397	19.0432	22.5332	22.2293	22.2678	23.2603	23.09
GDL88_ARATH	sp|Q9FM04|GDL88_ARATH GDSL esterase/lipase At5g62930 OS=Arabidopsis thaliana OX=3702 GN=At5g62930 PE=2 SV=3	At5g62930	27157	4	26.86	4	1.58493	0.0431949	22.707	20.9665	23.1308	23.2598	24.2196	24.0797
INO1_ARATH	sp|P42801|INO1_ARATH Inositol-3-phosphate synthase isozyme 1 OS=Arabidopsis thaliana OX=3702 GN=IPS1 PE=1 SV=3	IPS1	56515	4	12.13	2	1.57669	1	21.8804	21.4497	20.8718	23.1782	23.04	22.7137
IRX15_ARATH	sp|Q9SNE5|IRX15_ARATH Protein IRREGULAR XYLEM 15 OS=Arabidopsis thaliana OX=3702 GN=IRX15 PE=2 SV=1	IRX15	35807	3	8.7	3	1.55427	0.00542337	22.1188	20.9721	22.2592	23.4404	23.1853	23.3872
AKR2B_ARATH	sp|Q29Q26|AKR2B_ARATH Ankyrin repeat domain-containing protein 2B OS=Arabidopsis thaliana OX=3702 GN=AKR2B PE=1 SV=1	AKR2B	36899	7	28.2	2	1.55223	0.0283022	20.6034	20.2295	22.1252	22.363	22.2303	23.0216
ABP1_ARATH	sp|P33487|ABP1_ARATH Auxin-binding protein 1 OS=Arabidopsis thaliana OX=3702 GN=ERABP1 PE=1 SV=1	ERABP1	22044	4	32.83	4	1.54788	0.0250837	21.1656	22.6983	23.0871	23.9454	23.5645	24.0848
TENAE_ARATH	sp|Q9ASY9|TENAE_ARATH Bifunctional TENA-E protein OS=Arabidopsis thaliana OX=3702 GN=TENA_E PE=1 SV=3	TENA_E	25070	2	9.95	2	1.53438	0.0439586	20.2819	22.5856	20.8293	23.0036	22.5607	22.7356
A0A178UJF1_ARATH	tr|A0A178UJF1|A0A178UJF1_ARATH LRRNT_2 domain-containing protein OS=Arabidopsis thaliana OX=3702 GN=At5g61240 PE=4 SV=1	At5g61240	36796	5	18.71	5	1.52853	0.0235401	23.16	23.3788	21.5768	24.532	24.1621	24.0071
A0A178W0L8_ARATH	tr|A0A178W0L8|A0A178W0L8_ARATH (thale cress) hypothetical protein OS=Arabidopsis thaliana OX=3702 GN=AXX17_At1g26630 PE=4 SV=1	AXX17_At1g26630	34847	3	13.29	3	1.52779	0.0297249	20.6804	22.1491	22.7306	23.6761	23.2312	23.2361
XRN4_ARATH	sp|Q9FQ04|XRN4_ARATH 5'-3' exoribonuclease 4 OS=Arabidopsis thaliana OX=3702 GN=XRN4 PE=1 SV=1	XRN4	107778	4	6.12	2	1.52322	0.412035	18.2752	16.7949	18.0297	23.2409	17.3683	17.0601
IMPA6_ARATH	sp|Q9FWY7|IMPA6_ARATH Importin subunit alpha-6 OS=Arabidopsis thaliana OX=3702 GN=IMPA6 PE=1 SV=1	IMPA6	59389	6	16.36	3	1.51917	0.00862319	20.9759	20.9118	20.4547	22.1023	23.1088	21.6888
RBG5_ARATH	sp|Q9C909|RBG5_ARATH Glycine-rich RNA-binding protein 5, mitochondrial OS=Arabidopsis thaliana OX=3702 GN=RBG5 PE=1 SV=1	RBG5	28728	5	14.53	5	1.50113	0.239816	24.0805	24.482	25.4998	25.1524	28.7746	24.6387
A0A1I9LTQ0_ARATH	tr|A0A1I9LTQ0|A0A1I9LTQ0_ARATH RmlC-type cupin OS=Arabidopsis thaliana OX=3702 GN=At3g56820 PE=1 SV=1	At3g56820	18145	3	20.25	3	1.49848	0.00951389	20.9539	22.106	20.8667	22.3852	22.9011	23.1357
RAA2B_ARATH	sp|Q9LNW1|RAA2B_ARATH Ras-related protein RABA2b OS=Arabidopsis thaliana OX=3702 GN=RABA2B PE=2 SV=2	RABA2B	23689	12	52.34	3	1.49611	0.00695629	20.9153	21.2049	20.9507	22.9927	22.869	21.6976
RBL12_ARATH	sp|Q9FZ81|RBL12_ARATH RHOMBOID-like protein 12, mitochondrial OS=Arabidopsis thaliana OX=3702 GN=RBL12 PE=2 SV=1	RBL12	37441	2	8.93	2	1.48779	0.0358797	22.4902	20.8833	20.4361	22.8741	22.4365	22.9623
CSN7_ARATH	sp|Q94JU3|CSN7_ARATH COP9 signalosome complex subunit 7 OS=Arabidopsis thaliana OX=3702 GN=CSN7 PE=1 SV=1	CSN7	29469	2	8.46	2	1.48622	0.0173325	20.8668	21.28	22.4842	22.715	22.9581	23.4166
OFUT1_ARATH	sp|Q8W486|OFUT1_ARATH O-fucosyltransferase 1 OS=Arabidopsis thaliana OX=3702 GN=OFUT1 PE=2 SV=1	OFUT1	59043	3	7.51	3	1.47465	0.0328755	21.2227	20.7117	21.1813	23.2269	21.3194	22.9933
A0A178USK2_ARATH	tr|A0A178USK2|A0A178USK2_ARATH (thale cress) hypothetical protein OS=Arabidopsis thaliana OX=3702 GN=AXX17_At4g15690 PE=4 SV=1	AXX17_At4g15690	50601	5	14.03	3	1.47375	0.0645977	21.8069	19.8461	20.5175	21.1902	22.7918	22.6097
A0A5S9X8X6_ARATH	tr|A0A5S9X8X6|A0A5S9X8X6_ARATH (thale cress) hypothetical protein OS=Arabidopsis thaliana OX=3702 GN=AT9943_LOCUS10035 PE=4 SV=1	AT9943_LOCUS10035	35052	3	15.89	2	1.45385	0.0281954	22.755	21.6887	20.7425	23.0439	23.3354	23.1685
A0A178VYI8_ARATH	tr|A0A178VYI8|A0A178VYI8_ARATH (thale cress) hypothetical protein OS=Arabidopsis thaliana OX=3702 GN=AXX17_At2g03380 PE=4 SV=1	AXX17_At2g03380	64546	8	20.07	5	1.45054	0.020446	22.234	22.939	21.1841	23.7448	23.7295	23.2345
SH3P3_ARATH	sp|Q8L7W0|SH3P3_ARATH SH3 domain-containing protein 3 OS=Arabidopsis thaliana OX=3702 GN=SH3P3 PE=1 SV=1	SH3P3	39534	5	19.66	3	1.434	0.061655	21.9751	21.7742	22.0334	21.9026	24.1119	24.0701
GGPP1_ARATH	sp|P34802|GGPP1_ARATH Heterodimeric geranylgeranyl pyrophosphate synthase large subunit 1, chloroplastic OS=Arabidopsis thaliana OX=3702 GN=GGPPS1 PE=1 SV=2	GGPPS1	40174	8	32.35	8	1.42517	0.0061836	23.3889	24.211	22.9498	24.8904	25.1776	24.7572
A0A178WGW2_ARATH	tr|A0A178WGW2|A0A178WGW2_ARATH Aspartate aminotransferase OS=Arabidopsis thaliana OX=3702 GN=AXX17_At1g56090 PE=3 SV=1	AXX17_At1g56090	44572	11	34.57	8	1.40919	0.0823141	23.7546	23.919	26.1842	26.3036	25.9105	25.8714
GET3A_ARATH	sp|Q949M9|GET3A_ARATH ATPase GET3A OS=Arabidopsis thaliana OX=3702 GN=GET3A PE=1 SV=1	GET3A	39670	12	43.91	11	1.40873	0.00576836	23.7896	25.0527	24.4557	26.0101	25.6596	25.8546
A0A384L8F5_ARATH	tr|A0A384L8F5|A0A384L8F5_ARATH (thale cress) hypothetical protein OS=Arabidopsis thaliana OX=3702 GN=AXX17_At3g56300 PE=4 SV=1	AXX17_At3g56300	141550	11	10.13	9	1.40447	0.153062	20.9374	21.5563	21.7467	24.4126	21.0126	23.0286
CNIF1_ARATH	sp|Q93WX6|CNIF1_ARATH Cysteine desulfurase 1, chloroplastic OS=Arabidopsis thaliana OX=3702 GN=NFS2 PE=1 SV=1	NFS2	50485	9	41.04	5	1.40428	0.0265771	22.7926	22.8807	23.3003	23.3747	24.629	25.1828
R13L4_ARATH	sp|Q38834|R13L4_ARATH Disease resistance RPP13-like protein 4 OS=Arabidopsis thaliana OX=3702 GN=RPP13L4 PE=1 SV=2	RPP13L4	97040	4	6.69	3	1.39802	0.052887	21.0127	20.7037	20.3833	21.1081	21.8482	23.3374
FDFT1_ARATH	sp|P53799|FDFT1_ARATH Squalene synthase 1 OS=Arabidopsis thaliana OX=3702 GN=SQS1 PE=1 SV=1	SQS1	47142	7	29.76	2	1.3922	0.139958	22.5409	19.7824	19.8324	22.2069	22.6253	21.5002
UXS2_ARATH	sp|Q9LZI2|UXS2_ARATH UDP-glucuronic acid decarboxylase 2 OS=Arabidopsis thaliana OX=3702 GN=UXS2 PE=1 SV=1	UXS2	49971	19	53.26	3	1.37146	0.00804885	23.0379	23.2464	22.0094	24.0432	24.0039	24.361
TMK3_ARATH	sp|Q9SIT1|TMK3_ARATH Receptor-like kinase TMK3 OS=Arabidopsis thaliana OX=3702 GN=TMK3 PE=1 SV=1	TMK3	101959	9	14.1	5	1.37033	0.18179	20.9837	23.0339	22.3281	21.8307	24.8915	23.7345
A0A178V3Q7_ARATH	tr|A0A178V3Q7|A0A178V3Q7_ARATH DUF4408 domain-containing protein OS=Arabidopsis thaliana OX=3702 GN=AXX17_At4g30130 PE=4 SV=1	AXX17_At4g30130	32738	2	8.04	2	1.36486	0.0152627	21.3885	21.1344	20.7624	22.856	22.9215	21.6025
UBA2C_ARATH	sp|Q9LKA4|UBA2C_ARATH UBP1-associated protein 2C OS=Arabidopsis thaliana OX=3702 GN=UBA2C PE=2 SV=1	UBA2C	41780	8	28.47	7	1.36083	0.0263362	23.0886	24.5141	23.8024	24.926	24.7166	25.8451
PER50_ARATH	sp|Q43731|PER50_ARATH Peroxidase 50 OS=Arabidopsis thaliana OX=3702 GN=PER50 PE=1 SV=1	PER50	36076	10	42.25	7	1.36019	0.0256897	25.9842	25.8385	24.3585	26.8819	26.505	26.8749
ALFL7_ARATH	sp|Q8LA16|ALFL7_ARATH PHD finger protein ALFIN-LIKE 7 OS=Arabidopsis thaliana OX=3702 GN=AL7 PE=1 SV=1	AL7	28286	4	16.67	4	1.34397	0.110682	22.8011	24.7804	22.8316	25.3959	25.3103	23.7388
NAA25_ARATH	sp|F4KEY9|NAA25_ARATH N-terminal acetyltransferase B complex auxiliary subunit NAA25 OS=Arabidopsis thaliana OX=3702 GN=NAA25 PE=2 SV=1	NAA25	121463	5	5.82	5	1.341	0.172611	24.1377	21.1642	21.1543	23.9078	23.5591	23.0124
A0A178VPF0_ARATH	tr|A0A178VPF0|A0A178VPF0_ARATH (thale cress) hypothetical protein OS=Arabidopsis thaliana OX=3702 GN=At3g11450 PE=4 SV=1	At3g11450	74005	6	8.96	5	1.33755	0.0352164	20.8455	22.4396	22.3138	22.9072	22.9813	23.723
HSR4_ARATH	sp|Q8VZG2|HSR4_ARATH Protein HYPER-SENSITIVITY-RELATED 4 OS=Arabidopsis thaliana OX=3702 GN=HSR4 PE=2 SV=1	HSR4	66136	8	18.92	6	1.32519	0.0284111	23.5812	22.1147	23.2612	24.727	24.4673	23.7383
GSTFB_ARATH	sp|Q96324|GSTFB_ARATH Glutathione S-transferase F11 OS=Arabidopsis thaliana OX=3702 GN=GSTF11 PE=2 SV=1	GSTF11	24637	6	43.46	4	1.32519	0.104129	22.4596	20.9192	22.4715	22.3841	24.4986	22.943
PS6AB_ARATH	sp|O04019|PS6AB_ARATH 26S proteasome regulatory subunit 6A homolog B OS=Arabidopsis thaliana OX=3702 GN=RPT5B PE=1 SV=3	RPT5B	47038	17	47.28	2	1.3231	0.00969122	21.2982	21.1285	22.277	23.2185	22.866	22.5886
SUC1_ARATH	sp|Q39232|SUC1_ARATH Sucrose transport protein SUC1 OS=Arabidopsis thaliana OX=3702 GN=SUC1 PE=1 SV=1	SUC1	54858	4	13.06	4	1.29811	0.0136922	21.7527	22.1675	21.7243	23.6062	22.3699	23.5628
PAL3_ARATH	sp|P45725|PAL3_ARATH Phenylalanine ammonia-lyase 3 OS=Arabidopsis thaliana OX=3702 GN=PAL3 PE=1 SV=3	PAL3	76241	16	30.12	9	1.29385	0.00616122	23.0434	23.2871	24.165	24.8538	24.6288	24.8945
BG3_ARATH	sp|F4J270|BG3_ARATH Probable glucan endo-1,3-beta-glucosidase BG3 OS=Arabidopsis thaliana OX=3702 GN=BG3 PE=2 SV=1	BG3	37632	4	16.13	4	1.28972	0.0275335	23.8882	24.1394	22.5572	24.5081	24.9993	24.9465
A0A178VZ92_ARATH	tr|A0A178VZ92|A0A178VZ92_ARATH SWIB/MDM2 domain-containing protein OS=Arabidopsis thaliana OX=3702 GN=AXX17_At2g10090 PE=4 SV=1	AXX17_At2g10090	15873	2	17.02	2	1.2817	0.292944	20.888	16.8897	20.7581	20.8828	20.4598	21.0382
A0A178VVV6_ARATH	tr|A0A178VVV6|A0A178VVV6_ARATH Uncharacterized protein OS=Arabidopsis thaliana OX=3702 GN=AXX17_At2g15340 PE=4 SV=1	AXX17_At2g15340	106371	4	5.15	3	1.27677	0.230363	20.0123	18.4835	20.3873	18.9569	21.7931	21.9633
A0A178V6B5_ARATH	tr|A0A178V6B5|A0A178V6B5_ARATH Uncharacterized protein OS=Arabidopsis thaliana OX=3702 GN=AXX17_At3g24290 PE=4 SV=1	AXX17_At3g24290	67553	3	8.17	3	1.27611	0.0124798	20.1195	20.12	20.192	21.7528	21.9047	20.6023
INVA3_ARATH	sp|Q43348|INVA3_ARATH Acid beta-fructofuranosidase 3, vacuolar OS=Arabidopsis thaliana OX=3702 GN=BFRUCT3 PE=2 SV=1	BFRUCT3	72228	10	21.76	5	1.27219	0.0208759	23.3891	23.3566	22.3472	24.7798	23.688	24.4416
BOB1_ARATH	sp|Q9LV09|BOB1_ARATH Protein BOBBER 1 OS=Arabidopsis thaliana OX=3702 GN=BOB1 PE=1 SV=1	BOB1	34507	5	22.7	4	1.26781	0.0129768	21.6232	22.8807	22.8053	23.8434	23.6238	23.6454
NILP2_ARATH	sp|Q94JV5|NILP2_ARATH Deaminated glutathione amidase, chloroplastic/cytosolic OS=Arabidopsis thaliana OX=3702 GN=NLP2 PE=1 SV=1	NLP2	33971	10	41.37	9	1.25954	0.032305	24.7587	24.2378	25.9747	26.2697	26.0529	26.4272
LEA2R_ARATH	sp|O82355|LEA2R_ARATH Desiccation-related protein At2g46140 OS=Arabidopsis thaliana OX=3702 GN=At2g46140 PE=1 SV=1	At2g46140	17846	2	13.86	2	1.25739	0.0933275	21.564	22.5952	20.0927	22.9775	22.5082	22.5385
RBOHD_ARATH	sp|Q9FIJ0|RBOHD_ARATH Respiratory burst oxidase homolog protein D OS=Arabidopsis thaliana OX=3702 GN=RBOHD PE=1 SV=1	RBOHD	103909	5	9.45	4	1.25418	0.0201355	20.9613	22.3527	21.7853	22.5551	23.3026	23.0042
RAE1E_ARATH	sp|Q9SF91|RAE1E_ARATH Ras-related protein RABE1e OS=Arabidopsis thaliana OX=3702 GN=RABE1E PE=1 SV=1	RABE1E	24295	10	47.71	2	1.25227	0.0190528	21.6359	21.1933	21.4262	21.8055	23.1141	23.0926
HIR1_ARATH	sp|Q9FM19|HIR1_ARATH Hypersensitive-induced response protein 1 OS=Arabidopsis thaliana OX=3702 GN=HIR1 PE=1 SV=1	HIR1	31431	11	51.75	9	1.25187	0.0303182	26.2762	26.009	27.5855	27.5934	28.1513	27.8817
U71C5_ARATH	sp|Q9FE68|U71C5_ARATH UDP-glycosyltransferase 71C5 OS=Arabidopsis thaliana OX=3702 GN=UGT71C5 PE=2 SV=1	UGT71C5	52646	5	16.46	5	1.24776	0.0596101	22.4874	22.567	24.4001	24.2549	24.4504	24.4924
A0A5S9XX06_ARATH	tr|A0A5S9XX06|A0A5S9XX06_ARATH Saposin B-type domain-containing protein OS=Arabidopsis thaliana OX=3702 GN=At4g29520 PE=4 SV=1	At4g29520	34364	4	21.9	3	1.23761	0.0527866	20.8306	22.223	22.391	22.3835	23.2914	23.4825
E134_ARATH	sp|Q94CD8|E134_ARATH Glucan endo-1,3-beta-glucosidase 4 OS=Arabidopsis thaliana OX=3702 GN=At3g13560 PE=2 SV=1	At3g13560	54416	6	15.45	6	1.22792	0.0152609	22.8167	23.7435	23.703	25.2089	24.4726	24.2654
P24B3_ARATH	sp|Q9LIL4|P24B3_ARATH Transmembrane emp24 domain-containing protein p24beta3 OS=Arabidopsis thaliana OX=3702 GN=At3g22845 PE=2 SV=1	At3g22845	24282	4	29.91	3	1.21085	0.00986775	24.3024	23.1855	23.5757	25.0071	25.1141	24.575
Y1133_ARATH	sp|Q9SXB8|Y1133_ARATH G-type lectin S-receptor-like serine/threonine-protein kinase At1g11330 OS=Arabidopsis thaliana OX=3702 GN=At1g11330 PE=1 SV=3	At1g11330	94318	2	3.09	2	1.20916	0.135502	18.9721	21.5783	21.2851	21.6773	21.8509	21.9347
A0A178VY01_ARATH	tr|A0A178VY01|A0A178VY01_ARATH LRRNT_2 domain-containing protein OS=Arabidopsis thaliana OX=3702 GN=At2g34930 PE=4 SV=1	At2g34930	100268	9	10.94	7	1.20697	0.00693682	22.6592	22.9612	23.1685	24.1586	23.607	24.6442
A0A384KK41_ARATH	tr|A0A384KK41|A0A384KK41_ARATH Usp domain-containing protein OS=Arabidopsis thaliana OX=3702 GN=At3g11930 PE=1 SV=1	At3g11930	21529	5	29	4	1.20217	0.0708316	22.0735	22.2476	23.1736	22.8678	23.5124	24.721
ACA2_ARATH	sp|O81108|ACA2_ARATH Calcium-transporting ATPase 2, plasma membrane-type OS=Arabidopsis thaliana OX=3702 GN=ACA2 PE=1 SV=1	ACA2	110439	14	15.88	9	1.19606	0.0104154	23.6275	24.5431	23.7357	25.1258	24.795	25.5737
SKIP_ARATH	sp|O80653|SKIP_ARATH SNW/SKI-interacting protein OS=Arabidopsis thaliana OX=3702 GN=SKIP PE=1 SV=1	SKIP	69423	6	13.54	5	1.19077	0.0397414	23.2275	22.3705	23.2416	23.5597	23.8473	25.0049
GPDL3_ARATH	sp|Q9SZ11|GPDL3_ARATH Glycerophosphodiester phosphodiesterase GDPDL3 OS=Arabidopsis thaliana OX=3702 GN=GDPDL3 PE=2 SV=3	GDPDL3	82562	8	14.76	6	1.18529	0.277832	20.9352	22.0415	20.6282	24.5598	21.5955	21.0054
A0A384KHS9_ARATH	tr|A0A384KHS9|A0A384KHS9_ARATH Uncharacterized protein OS=Arabidopsis thaliana OX=3702 GN=At3g20800 PE=4 SV=1	At3g20800	34711	3	15.19	3	1.18374	0.0343968	22.6961	21.3554	21.1692	23.1901	22.8838	22.698
PUMP2_ARATH	sp|Q9ZWG1|PUMP2_ARATH Mitochondrial uncoupling protein 2 OS=Arabidopsis thaliana OX=3702 GN=PUMP2 PE=2 SV=1	PUMP2	33442	6	25.57	4	1.18022	0.137326	20.7542	22.5745	21.942	23.3203	21.7381	23.7529
A0A5S9Y6J2_ARATH	tr|A0A5S9Y6J2|A0A5S9Y6J2_ARATH Uncharacterized protein OS=Arabidopsis thaliana OX=3702 GN=C24_LOCUS22963 PE=4 SV=1	C24_LOCUS22963	81798	5	11.37	4	1.17163	0.0427815	20.7754	21.1248	20.9686	21.1624	22.2733	22.9479
FRI3_ARATH	sp|Q9LYN2|FRI3_ARATH Ferritin-3, chloroplastic OS=Arabidopsis thaliana OX=3702 GN=FER3 PE=1 SV=1	FER3	28837	6	37.07	4	1.16936	0.0122518	23.0274	22.0118	21.8609	23.5809	23.3402	23.487
HDT1_ARATH	sp|Q9FVE6|HDT1_ARATH Histone deacetylase HDT1 OS=Arabidopsis thaliana OX=3702 GN=HDT1 PE=1 SV=1	HDT1	26372	3	17.96	3	1.16681	0.0120082	21.6131	20.9082	21.7032	23.0124	22.0772	22.6353
ORRM2_ARATH	sp|Q9FIU6|ORRM2_ARATH Organelle RRM domain-containing protein 2, mitochondrial OS=Arabidopsis thaliana OX=3702 GN=ORRM2 PE=1 SV=1	ORRM2	17090	2	17.95	2	1.16509	0.00924846	21.017	19.9478	20.753	21.6226	21.6008	21.9897
Y5389_ARATH	sp|Q9FID9|Y5389_ARATH Probable receptor-like protein kinase At5g38990 OS=Arabidopsis thaliana OX=3702 GN=At5g38990 PE=2 SV=1	At5g38990	97953	6	8.52	6	1.16481	0.0435583	23.0789	22.7512	21.6286	23.145	23.6358	24.1722
APY1_ARATH	sp|Q9SQG2|APY1_ARATH Apyrase 1 OS=Arabidopsis thaliana OX=3702 GN=APY1 PE=1 SV=1	APY1	51194	4	15.29	2	1.14829	0.00568297	21.3737	20.7205	21.5885	22.5701	22.4742	22.0833
SYYC2_ARATH	sp|F4HWL4|SYYC2_ARATH Tyrosine--tRNA ligase 2, cytoplasmic OS=Arabidopsis thaliana OX=3702 GN=At1g28350 PE=1 SV=1	At1g28350	84717	9	18.05	4	1.14561	0.115137	22.2271	21.3514	23.7113	24.0178	23.5462	23.1626
A0A5S9WLJ7_ARATH	tr|A0A5S9WLJ7|A0A5S9WLJ7_ARATH Uncharacterized protein OS=Arabidopsis thaliana OX=3702 GN=C24_LOCUS3306 PE=4 SV=1	C24_LOCUS3306	80438	2	4.85	2	1.14057	0.420359	16.843	21.1334	16.0832	19.1438	19.1545	19.183
LRX4_ARATH	sp|Q9LHF1|LRX4_ARATH Leucine-rich repeat extensin-like protein 4 OS=Arabidopsis thaliana OX=3702 GN=LRX4 PE=1 SV=1	LRX4	54703	4	8.7	4	1.13781	0.00960555	22.7141	22.4352	23.0977	24.0904	24.2373	23.3327
A0A384L9K6_ARATH	tr|A0A384L9K6|A0A384L9K6_ARATH (thale cress) hypothetical protein OS=Arabidopsis thaliana OX=3702 GN=AXX17_At1g15760 PE=4 SV=1	AXX17_At1g15760	63675	7	20.59	5	1.13344	0.00854097	23.3029	23.0105	22.5817	24.5177	23.6441	24.1335
AKRCA_ARATH	sp|Q84TF0|AKRCA_ARATH Aldo-keto reductase family 4 member C10 OS=Arabidopsis thaliana OX=3702 GN=AKR4C10 PE=1 SV=1	AKR4C10	34913	8	35.35	4	1.13154	0.044724	22.42	21.2857	22.6356	23.7879	22.7305	23.2175
CALX2_ARATH	sp|Q38798|CALX2_ARATH Calnexin homolog 2 OS=Arabidopsis thaliana OX=3702 GN=At5g07340 PE=2 SV=2	At5g07340	60490	15	42.86	7	1.1291	0.080228	22.071	23.1193	21.2178	23.5266	23.6098	22.659
C3H64_ARATH	sp|Q84WU9|C3H64_ARATH Zinc finger CCCH domain-containing protein 64 OS=Arabidopsis thaliana OX=3702 GN=At5g56900 PE=2 SV=1	At5g56900	66421	6	14.26	2	1.12845	0.0837075	20.3433	20.9044	21.2484	23.0277	21.8231	21.0307
A0A178UZD4_ARATH	tr|A0A178UZD4|A0A178UZD4_ARATH (thale cress) hypothetical protein OS=Arabidopsis thaliana OX=3702 GN=AXX17_At4g31940 PE=4 SV=1	AXX17_At4g31940	50856	4	11.52	4	1.12457	0.0101764	22.499	22.2375	21.9936	23.9772	23.1368	22.9899
A0A5S9Y0Z2_ARATH	tr|A0A5S9Y0Z2|A0A5S9Y0Z2_ARATH Trafficking protein particle complex subunit OS=Arabidopsis thaliana OX=3702 GN=AT9943_LOCUS18112 PE=3 SV=1	AT9943_LOCUS18112	16011	2	19.86	2	1.11648	0.0515983	21.5138	21.3027	21.2811	21.4266	22.9368	23.0835
A0A178WMF1_ARATH	tr|A0A178WMF1|A0A178WMF1_ARATH Uncharacterized protein OS=Arabidopsis thaliana OX=3702 GN=AXX17_At1g35950 PE=3 SV=1	AXX17_At1g35950	99767	6	9.23	5	1.10402	0.386796	23.2026	22.2334	23.0124	22.6588	22.4291	26.6725
RBL15_ARATH	sp|Q8LB17|RBL15_ARATH Rhomboid-like protein 15 OS=Arabidopsis thaliana OX=3702 GN=RBL15 PE=1 SV=2	RBL15	44145	5	21.34	4	1.09403	0.00540447	22.3725	21.9438	21.4772	23.0979	22.8107	23.167
ANM14_ARATH	sp|A3KPF2|ANM14_ARATH Probable histone-arginine methyltransferase 1.4 OS=Arabidopsis thaliana OX=3702 GN=PRMT14 PE=1 SV=1	PRMT14	58857	8	24.43	5	1.08634	0.0735507	21.4159	21.623	22.2005	22.808	23.7737	21.9167
F4JLQ2_ARATH	tr|F4JLQ2|F4JLQ2_ARATH Transmembrane protein OS=Arabidopsis thaliana OX=3702 GN=At4g16180 PE=1 SV=1	At4g16180	92369	9	15.98	8	1.07719	0.0425846	25.3148	24.3997	23.6403	25.5021	25.5034	25.5809
ALFL2_ARATH	sp|Q9SRM4|ALFL2_ARATH PHD finger protein ALFIN-LIKE 2 OS=Arabidopsis thaliana OX=3702 GN=AL2 PE=1 SV=1	AL2	27832	3	15.85	2	1.06864	0.20875	22.2851	20.379	20.407	22.8232	20.8182	22.6355
A0A654GEF4_ARATH	tr|A0A654GEF4|A0A654GEF4_ARATH Foie-gras_1 domain-containing protein OS=Arabidopsis thaliana OX=3702 GN=At5g65950 PE=4 SV=1	At5g65950	132228	12	14.29	10	1.06762	0.0334451	22.3784	23.266	22.8368	23.1658	24.3044	24.2138
COG1_ARATH	sp|Q9FFF3|COG1_ARATH Conserved oligomeric Golgi complex subunit 1 OS=Arabidopsis thaliana OX=3702 GN=COG1 PE=1 SV=1	COG1	118802	22	29.78	17	1.06451	0.0309295	24.5953	23.2319	24.3045	24.8649	25.3132	25.1471
4CLL5_ARATH	sp|Q84P21|4CLL5_ARATH 4-coumarate--CoA ligase-like 5 OS=Arabidopsis thaliana OX=3702 GN=4CLL5 PE=1 SV=2	4CLL5	59375	9	23.99	6	1.06418	0.00894963	24.3616	24.0621	24.5585	25.9053	24.9704	25.2991
PSD7B_ARATH	sp|Q9C774|PSD7B_ARATH 26S proteasome non-ATPase regulatory subunit 7 homolog B OS=Arabidopsis thaliana OX=3702 GN=RPN8B PE=1 SV=1	RPN8B	35085	12	55.48	2	1.05773	0.0266634	22.0076	21.8956	21.9405	22.408	23.7964	22.8125
AKRCB_ARATH	sp|Q9M338|AKRCB_ARATH Aldo-keto reductase family 4 member C11 OS=Arabidopsis thaliana OX=3702 GN=AKR4C11 PE=1 SV=1	AKR4C11	35036	5	29.84	5	1.05602	0.0466242	21.9036	22.5587	23.4787	23.6393	23.4409	24.0289
HNL_ARATH	sp|Q9LFT6|HNL_ARATH Alpha-hydroxynitrile lyase OS=Arabidopsis thaliana OX=3702 GN=HNL PE=1 SV=1	HNL	29217	5	29.46	5	1.05093	0.0726287	21.2738	21.1704	21.5696	23.1905	22.641	21.3352
TPR4_ARATH	sp|Q27GK7|TPR4_ARATH Topless-related protein 4 OS=Arabidopsis thaliana OX=3702 GN=TPR4 PE=1 SV=2	TPR4	124104	16	14.89	4	1.04832	0.0362173	21.2329	22.2289	22.5649	22.9034	22.8098	23.4586
A0A178VZK5_ARATH	tr|A0A178VZK5|A0A178VZK5_ARATH Emb2444 OS=Arabidopsis thaliana OX=3702 GN=At2g18510 PE=3 SV=1	At2g18510	39888	3	11.57	2	1.04347	0.067679	22.0651	21.8469	23.5775	23.5688	23.4686	23.5826
FUM2_ARATH	sp|Q9FI53|FUM2_ARATH Fumarate hydratase 2 OS=Arabidopsis thaliana OX=3702 GN=FUM2 PE=1 SV=1	FUM2	54084	19	58.12	4	1.03484	0.101146	20.9401	22.9183	22.5931	22.9262	23.2895	23.3403
RNP1_ARATH	sp|Q8W034|RNP1_ARATH Heterogeneous nuclear ribonucleoprotein 1 OS=Arabidopsis thaliana OX=3702 GN=RNP1 PE=1 SV=1	RNP1	42353	1	4.62	1	1.03385	0.00667311	20.9831	21.7063	21.2494	22.4539	21.9958	22.5906
A0A7G2DU51_ARATH	tr|A0A7G2DU51|A0A7G2DU51_ARATH (thale cress) hypothetical protein OS=Arabidopsis thaliana OX=3702 GN=AT9943_LOCUS760 PE=3 SV=1	AT9943_LOCUS760	88922	4	4.15	3	1.03184	0.292841	21.5878	21.3588	21.277	22.4112	20.6205	24.2874
A0A178V4V7_ARATH	tr|A0A178V4V7|A0A178V4V7_ARATH Thioredox_DsbH domain-containing protein OS=Arabidopsis thaliana OX=3702 GN=AXX17_At4g03980 PE=4 SV=1	AXX17_At4g03980	91895	5	8.68	5	1.03167	0.0795718	20.9767	22.8867	22.3538	23.0308	23.1063	23.1751
DIR20_ARATH	sp|Q9C891|DIR20_ARATH Dirigent protein 20 OS=Arabidopsis thaliana OX=3702 GN=DIR20 PE=2 SV=1	DIR20	20618	6	25.13	6	1.02768	0.0182782	24.5965	24.7542	25.7036	25.8773	26.2286	26.0315
HEN2_ARATH	sp|Q9ZVW2|HEN2_ARATH DExH-box ATP-dependent RNA helicase DExH10 OS=Arabidopsis thaliana OX=3702 GN=HEN2 PE=1 SV=2	HEN2	111889	6	9.15	4	1.02607	0.0255431	21.6796	21.1804	21.9488	23.0607	22.8339	21.9924
A0A178UMM8_ARATH	tr|A0A178UMM8|A0A178UMM8_ARATH (thale cress) hypothetical protein OS=Arabidopsis thaliana OX=3702 GN=At5g08410 PE=4 SV=1	At5g08410	20146	2	15.76	1	1.01187	0.0128052	22.5375	22.8123	22.4273	23.0185	23.7812	24.013
STAD7_ARATH	sp|O22832|STAD7_ARATH Stearoyl-[acyl-carrier-protein] 9-desaturase 7, chloroplastic OS=Arabidopsis thaliana OX=3702 GN=FAB2 PE=1 SV=1	FAB2	45693	13	40.9	6	1.01164	0.0120668	23.2911	24.1978	23.9047	25.1418	24.7003	24.5864
A0A178UTU7_ARATH	tr|A0A178UTU7|A0A178UTU7_ARATH Uncharacterized protein OS=Arabidopsis thaliana OX=3702 GN=AXX17_At5g57430 PE=4 SV=1	AXX17_At5g57430	107673	8	11.53	7	1.0081	0.0650728	23.7863	22.2066	22.6433	23.4623	24.1853	24.0129
QQT2_ARATH	sp|Q8W586|QQT2_ARATH GPN-loop GTPase QQT2 OS=Arabidopsis thaliana OX=3702 GN=QQT2 PE=1 SV=1	QQT2	42551	1	2.37	1	1.00797	1	21.3013	21.0459	20.9049	22.1434	22.4246	21.7079
COG8_ARATH	sp|Q84K25|COG8_ARATH Conserved oligomeric Golgi complex subunit 8 OS=Arabidopsis thaliana OX=3702 GN=COG8 PE=1 SV=1	COG8	63052	9	18.8	8	1.00711	0.188472	23.4089	22.0714	22.5489	24.1681	24.5778	22.3047
A0A178W473_ARATH	tr|A0A178W473|A0A178W473_ARATH Protein kinase domain-containing protein OS=Arabidopsis thaliana OX=3702 GN=At1g52540 PE=1 SV=1	At1g52540	39868	5	23.71	3	1.00006	0.0189194	21.9739	21.7342	22.8249	23.3206	23.28	22.9325
FK152_ARATH	sp|Q38936|FK152_ARATH Peptidyl-prolyl cis-trans isomerase FKBP15-2 OS=Arabidopsis thaliana OX=3702 GN=FKBP15-2 PE=2 SV=2	FKBP15-2	17658	7	34.36	5	0.997978	0.0354312	23.9075	23.0728	24.5101	24.9048	24.8909	24.6887
A0A178VUJ2_ARATH	tr|A0A178VUJ2|A0A178VUJ2_ARATH SEH OS=Arabidopsis thaliana OX=3702 GN=At2g26740 PE=4 SV=1	At2g26740	36424	10	43.93	10	0.996203	0.132071	28.3318	26.3464	26.8882	28.5979	27.5646	28.3924
A0A7G2E5K6_ARATH	tr|A0A7G2E5K6|A0A7G2E5K6_ARATH (thale cress) hypothetical protein OS=Arabidopsis thaliana OX=3702 GN=AT9943_LOCUS4276 PE=3 SV=1	AT9943_LOCUS4276	97411	20	30.75	2	0.996023	0.288708	21.1571	21.4504	21.5559	24.3982	21.2857	21.4676
LECT5_ARATH	sp|Q9LK72|LECT5_ARATH Lectin-like protein At3g16530 OS=Arabidopsis thaliana OX=3702 GN=At3g16530 PE=1 SV=1	At3g16530	30509	19	62.68	17	0.99411	0.000246447	28.1519	28.2979	28.4095	29.1802	29.3904	29.271
R47BP_ARATH	sp|Q8VXZ9|R47BP_ARATH Polyadenylate-binding protein RBP47B' OS=Arabidopsis thaliana OX=3702 GN=RBP47B' PE=2 SV=1	RBP47B'	46597	6	22.12	5	0.991806	0.0916002	21.5826	22.9908	22.9598	23.7028	23.97	22.8358
A0A654G1H7_ARATH	tr|A0A654G1H7|A0A654G1H7_ARATH (thale cress) hypothetical protein OS=Arabidopsis thaliana OX=3702 GN=AN1_LOCUS22404 PE=4 SV=1	AN1_LOCUS22404	143437	6	7.63	4	0.991805	0.0654167	22.765	21.6044	22.8113	22.7457	23.6088	23.8016
AMY1_ARATH	sp|Q8VZ56|AMY1_ARATH Alpha-amylase 1 OS=Arabidopsis thaliana OX=3702 GN=AMY1 PE=1 SV=1	AMY1	47378	23	74.94	21	0.99059	0.000361279	26.5354	26.3732	26.3426	27.4681	27.5324	27.2225
KEG_ARATH	sp|Q9FY48|KEG_ARATH E3 ubiquitin-protein ligase KEG OS=Arabidopsis thaliana OX=3702 GN=KEG PE=1 SV=2	KEG	178216	8	6.71	6	0.989763	0.0822799	20.9123	22.29	22.658	22.7091	22.8871	23.2334
SCC3_ARATH	sp|O82265|SCC3_ARATH Sister-chromatid cohesion protein 3 OS=Arabidopsis thaliana OX=3702 GN=SCC3 PE=1 SV=2	SCC3	125759	5	7.01	4	0.989379	0.0776947	20.364	19.9183	20.3716	21.558	20.1833	21.8808
PGTA1_ARATH	sp|Q8VYB7|PGTA1_ARATH Geranylgeranyl transferase type-2 subunit alpha 1 OS=Arabidopsis thaliana OX=3702 GN=RGTA1 PE=1 SV=1	RGTA1	76909	8	19.32	5	0.988596	0.0143955	23.2022	22.538	23.4003	24.0038	24.3811	23.7213
TRXH5_ARATH	sp|Q39241|TRXH5_ARATH Thioredoxin H5 OS=Arabidopsis thaliana OX=3702 GN=TRX5 PE=1 SV=1	TRX5	13122	8	54.24	8	0.988136	0.0504911	25.2286	23.6799	24.6369	25.7444	25.3922	25.3733
ILL4_ARATH	sp|O04373|ILL4_ARATH IAA-amino acid hydrolase ILR1-like 4 OS=Arabidopsis thaliana OX=3702 GN=ILL4 PE=1 SV=2	ILL4	48263	12	45.68	10	0.984061	0.0037357	25.8316	25.6252	26.2418	27.1234	26.6663	26.8611
A0A178VSK5_ARATH	tr|A0A178VSK5|A0A178VSK5_ARATH (thale cress) hypothetical protein OS=Arabidopsis thaliana OX=3702 GN=AXX17_At2g41150 PE=4 SV=1	AXX17_At2g41150	30669	2	8.39	2	0.984041	0.00494959	21.6405	21.5136	22.0204	22.5481	22.4951	23.0834
A0A384KII4_ARATH	tr|A0A384KII4|A0A384KII4_ARATH (thale cress) hypothetical protein OS=Arabidopsis thaliana OX=3702 GN=AXX17_At3g09720 PE=1 SV=1	AXX17_At3g09720	16737	2	18.79	1	0.982618	0.000402717	20.6753	20.954	21.0415	21.8344	21.9338	21.8504
ALAT2_ARATH	sp|Q9LDV4|ALAT2_ARATH Alanine aminotransferase 2, mitochondrial OS=Arabidopsis thaliana OX=3702 GN=ALAAT2 PE=1 SV=1	ALAAT2	59511	14	37.22	2	0.98257	0.0595198	21.5174	21.7548	21.988	23.5667	21.9362	22.705
MSL1_ARATH	sp|Q8VZL4|MSL1_ARATH Mechanosensitive ion channel protein 1, mitochondrial OS=Arabidopsis thaliana OX=3702 GN=MSL1 PE=1 SV=1	MSL1	53884	4	20.12	2	0.982032	0.0150945	22.8298	21.7627	22.0325	23.3007	23.1291	23.1413
TRBP2_ARATH	sp|P25269|TRBP2_ARATH Tryptophan synthase beta chain 2, chloroplastic OS=Arabidopsis thaliana OX=3702 GN=TSB2 PE=1 SV=2	TSB2	51601	17	49.26	3	0.980727	0.00598729	23.2926	22.7231	22.4445	23.7144	23.8469	23.8409
SDRA_ARATH	sp|Q9S9W2|SDRA_ARATH Short-chain dehydrogenase/reductase SDRA OS=Arabidopsis thaliana OX=3702 GN=SDRA PE=1 SV=1	SDRA	26765	12	52.36	12	0.979175	0.00095262	25.8749	25.9192	25.4887	26.8315	26.6112	26.7776
PAP12_ARATH	sp|Q8LAP6|PAP12_ARATH Probable plastid-lipid-associated protein 12, chloroplastic OS=Arabidopsis thaliana OX=3702 GN=PAP12 PE=1 SV=1	PAP12	45765	14	43.28	13	0.979081	0.00178198	24.8257	25.3431	25.1773	25.902	26.2369	26.1445
A0A384KNJ3_ARATH	tr|A0A384KNJ3|A0A384KNJ3_ARATH PKS_ER domain-containing protein OS=Arabidopsis thaliana OX=3702 GN=AXX17_At3g51070 PE=4 SV=1	AXX17_At3g51070	37266	12	49.71	12	0.978167	0.0137702	26.0492	26.5642	25.51	27.0134	26.8776	27.1669
A0A178US13_ARATH	tr|A0A178US13|A0A178US13_ARATH Uncharacterized protein OS=Arabidopsis thaliana OX=3702 GN=AXX17_At5g03850 PE=1 SV=1	AXX17_At5g03850	56659	7	17.51	7	0.977345	0.00592879	22.8374	23.2515	23.7032	24.2006	24.2275	24.296
A0A178VZW4_ARATH	tr|A0A178VZW4|A0A178VZW4_ARATH (thale cress) hypothetical protein OS=Arabidopsis thaliana OX=3702 GN=AXX17_At2g43100 PE=3 SV=1	AXX17_At2g43100	58963	5	13.31	3	0.977238	0.0745654	21.2199	21.4797	19.8041	21.9711	21.714	21.7505
NDHI_ARATH	sp|P56755|NDHI_ARATH NAD(P)H-quinone oxidoreductase subunit I, chloroplastic OS=Arabidopsis thaliana OX=3702 GN=ndhI PE=3 SV=1	ndhI	20086	4	20.93	2	0.972839	0.0178602	21.8613	21.7656	22.3893	22.5967	22.8243	23.5136
ECA4_ARATH	sp|Q9XES1|ECA4_ARATH Calcium-transporting ATPase 4, endoplasmic reticulum-type OS=Arabidopsis thaliana OX=3702 GN=ECA4 PE=2 SV=2	ECA4	116180	20	20.36	19	0.971751	0.000482162	25.3607	25.3044	25.6669	26.4535	26.3338	26.4599
HS904_ARATH	sp|O03986|HS904_ARATH Heat shock protein 90-4 OS=Arabidopsis thaliana OX=3702 GN=HSP90-4 PE=1 SV=1	HSP90-4	80141	58	62.95	3	0.971043	0.103929	20.6516	22.3766	22.4604	22.8909	22.8241	22.6868
SSL5_ARATH	sp|Q9CAZ7|SSL5_ARATH Protein STRICTOSIDINE SYNTHASE-LIKE 5 OS=Arabidopsis thaliana OX=3702 GN=SSL5 PE=2 SV=1	SSL5	41642	8	33.96	6	0.970627	0.0239731	23.7301	23.9779	24.8025	25.1867	24.8285	25.4072
AGD7_ARATH	sp|O80925|AGD7_ARATH ADP-ribosylation factor GTPase-activating protein AGD7 OS=Arabidopsis thaliana OX=3702 GN=AGD7 PE=1 SV=1	AGD7	49252	7	24.78	5	0.968198	0.000167014	23.1406	23.3379	23.1473	24.1117	24.2236	24.1952
CALR2_ARATH	sp|Q38858|CALR2_ARATH Calreticulin-2 OS=Arabidopsis thaliana OX=3702 GN=CRT2 PE=1 SV=3	CRT2	48157	28	59.91	27	0.965757	0.00155713	27.2649	27.2637	27.1358	28.5158	27.9742	28.0715
UCH2_ARATH	sp|O04482|UCH2_ARATH Ubiquitin carboxyl-terminal hydrolase 2 OS=Arabidopsis thaliana OX=3702 GN=UCH2 PE=1 SV=1	UCH2	37499	6	26.97	5	0.964726	0.258779	23.5787	23.5785	23.6656	26.4035	23.6224	23.6911
A0A178VTM0_ARATH	tr|A0A178VTM0|A0A178VTM0_ARATH Uncharacterized protein OS=Arabidopsis thaliana OX=3702 GN=AXX17_At2g22670 PE=4 SV=1	AXX17_At2g22670	199695	10	7.67	4	0.964182	0.129863	21.063	21.2885	19.879	22.3899	20.7973	21.9358
A0A7G2FHC2_ARATH	tr|A0A7G2FHC2|A0A7G2FHC2_ARATH (thale cress) hypothetical protein OS=Arabidopsis thaliana OX=3702 GN=AT9943_LOCUS20117 PE=3 SV=1	AT9943_LOCUS20117	129656	2	2.26	1	0.96333	0.0153083	21.4594	22.0578	21.5679	22.8875	22.9499	22.1376
MDHM2_ARATH	sp|Q9LKA3|MDHM2_ARATH Malate dehydrogenase 2, mitochondrial OS=Arabidopsis thaliana OX=3702 GN=At3g15020 PE=1 SV=1	At3g15020	35875	16	58.06	6	0.960414	0.000515813	24.6245	24.5593	24.5091	25.7114	25.5489	25.3139
A0A178UFW2_ARATH	tr|A0A178UFW2|A0A178UFW2_ARATH (thale cress) hypothetical protein OS=Arabidopsis thaliana OX=3702 GN=At5g11730 PE=4 SV=1	At5g11730	44268	3	8.81	3	0.958811	0.0573759	20.9312	21.3261	20.8429	22.5516	22.3182	21.1068
MDHX1_ARATH	sp|O82399|MDHX1_ARATH Malate dehydrogenase 1, peroxisomal OS=Arabidopsis thaliana OX=3702 GN=PMDH1 PE=1 SV=1	PMDH1	37466	15	74.86	13	0.958368	0.00104696	25.3073	25.5648	25.1224	26.4456	26.2452	26.1789
SC24C_ARATH	sp|Q9M291|SC24C_ARATH Protein transport protein Sec24-like CEF OS=Arabidopsis thaliana OX=3702 GN=CEF PE=2 SV=3	CEF	117691	17	21.99	16	0.958316	0.000441231	25.3377	25.2283	25.5603	26.4465	26.286	26.2687
DIM_ARATH	sp|Q39085|DIM_ARATH Delta(24)-sterol reductase OS=Arabidopsis thaliana OX=3702 GN=DIM PE=1 SV=2	DIM	65394	30	55.97	28	0.955039	0.0010439	26.6624	27.1116	26.9889	28.0067	27.7783	27.8429
A0A178W7D3_ARATH	tr|A0A178W7D3|A0A178W7D3_ARATH Uncharacterized protein OS=Arabidopsis thaliana OX=3702 GN=AXX17_At1g24670 PE=3 SV=1	AXX17_At1g24670	49541	6	15.43	4	0.954552	0.000679121	24.1387	24.2035	23.981	25.0833	25.2464	24.8572
PSB3B_ARATH	sp|O81153|PSB3B_ARATH Proteasome subunit beta type-3-B OS=Arabidopsis thaliana OX=3702 GN=PBC2 PE=1 SV=1	PBC2	22759	13	58.33	1	0.952903	0.00419768	22.2668	22.1315	22.4849	22.8624	23.5138	23.3657
SCRK7_ARATH	sp|Q9FLH8|SCRK7_ARATH Probable fructokinase-7 OS=Arabidopsis thaliana OX=3702 GN=At5g51830 PE=1 SV=1	At5g51830	37028	14	55.69	11	0.952705	0.000238543	25.1863	25.3902	25.4472	26.3546	26.2533	26.2739
HRD3A_ARATH	sp|Q9LM25|HRD3A_ARATH ERAD-associated E3 ubiquitin-protein ligase component HRD3A OS=Arabidopsis thaliana OX=3702 GN=HRD3A PE=1 SV=1	HRD3A	75942	11	19.91	8	0.947312	0.0811583	22.5246	22.4433	23.8135	24.2646	24.0319	23.3268
EP1L3_ARATH	sp|Q9ZVA4|EP1L3_ARATH EP1-like glycoprotein 3 OS=Arabidopsis thaliana OX=3702 GN=At1g78850 PE=1 SV=1	At1g78850	49051	22	49.43	21	0.942218	0.000143208	26.9914	27.1508	27.1629	28.05	28.0732	28.0085
ALFC5_ARATH	sp|O65581|ALFC5_ARATH Fructose-bisphosphate aldolase 5, cytosolic OS=Arabidopsis thaliana OX=3702 GN=FBA5 PE=1 SV=1	FBA5	38294	19	73.18	15	0.942001	0.000560974	27.0837	26.9528	26.7612	27.8059	27.7953	28.0225
GAUT9_ARATH	sp|Q9FWA4|GAUT9_ARATH Probable galacturonosyltransferase 9 OS=Arabidopsis thaliana OX=3702 GN=GAUT9 PE=2 SV=1	GAUT9	64160	5	11.59	4	0.940965	0.050545	21.6536	22.0215	22.069	23.6751	22.2591	22.6328
SFGH_ARATH	sp|Q8LAS8|SFGH_ARATH S-formylglutathione hydrolase OS=Arabidopsis thaliana OX=3702 GN=SFGH PE=1 SV=2	SFGH	31656	18	75	18	0.94076	0.000164317	28.8333	28.9345	29.0047	29.94	29.8585	29.7964
A0A5S9XDH9_ARATH	tr|A0A5S9XDH9|A0A5S9XDH9_ARATH Proteasome assembly chaperone 2 OS=Arabidopsis thaliana OX=3702 GN=At3g18940 PE=3 SV=1	At3g18940	30913	4	25.62	3	0.93638	0.0486944	23.098	22.2872	22.0413	22.8727	23.466	23.8968
VPS54_ARATH	sp|F4JT76|VPS54_ARATH Vacuolar protein sorting-associated protein 54, chloroplastic OS=Arabidopsis thaliana OX=3702 GN=VPS54 PE=1 SV=1	VPS54	113865	7	11.51	5	0.936331	0.192239	21.126	23.2526	22.4898	22.5017	23.2125	23.9632
A0A178W3C9_ARATH	tr|A0A178W3C9|A0A178W3C9_ARATH Uncharacterized protein OS=Arabidopsis thaliana OX=3702 GN=AXX17_At1g69000 PE=4 SV=1	AXX17_At1g69000	40998	3	15.95	2	0.934934	0.115865	21.7259	22.9872	21.0163	22.71	22.6826	23.1416
PEX22_ARATH	sp|Q9LSX7|PEX22_ARATH Peroxisome biogenesis protein 22 OS=Arabidopsis thaliana OX=3702 GN=PEX22 PE=1 SV=1	PEX22	31399	10	54.42	6	0.933453	0.0123969	24.4209	24.066	23.4794	24.8236	25.1137	24.8293
ELD1_ARATH	sp|Q9C9Z9|ELD1_ARATH Glycosyltransferase-like KOBITO 1 OS=Arabidopsis thaliana OX=3702 GN=ELD1 PE=1 SV=1	ELD1	59889	3	7.5	2	0.931952	0.00194281	22.0522	22.0551	22.1271	23.3056	23.0169	22.7077
DF197_ARATH	sp|O22869|DF197_ARATH Defensin-like protein 197 OS=Arabidopsis thaliana OX=3702 GN=ATTI6 PE=3 SV=1	ATTI6	10192	1	7.87	1	0.930342	0.000835015	22.6286	22.7184	22.9015	23.8665	23.6784	23.4946
TRPE_ARATH	sp|P32068|TRPE_ARATH Anthranilate synthase alpha subunit 1, chloroplastic OS=Arabidopsis thaliana OX=3702 GN=ASA1 PE=1 SV=1	ASA1	66312	9	18.15	8	0.929511	0.00169605	25.289	25.1056	25.0046	26.257	25.7796	26.1511
A0A178WE75_ARATH	tr|A0A178WE75|A0A178WE75_ARATH Peptidyl-prolyl cis-trans isomerase OS=Arabidopsis thaliana OX=3702 GN=At1g26550 PE=3 SV=1	At1g26550	14857	6	33.1	6	0.928886	0.0215091	24.173	24.3422	25.2545	25.5834	25.4824	25.4906
U79B2_ARATH	sp|Q9T080|U79B2_ARATH UDP-glycosyltransferase 79B2 OS=Arabidopsis thaliana OX=3702 GN=UGT79B2 PE=2 SV=1	UGT79B2	50615	12	42.42	9	0.927767	0.00253916	25.0251	24.5826	24.7783	25.7347	25.4813	25.9533
A0A178W6M7_ARATH	tr|A0A178W6M7|A0A178W6M7_ARATH Uncharacterized protein OS=Arabidopsis thaliana OX=3702 GN=AXX17_At1g57900 PE=4 SV=1	AXX17_At1g57900	38247	1	4.55	1	0.927408	0.0799821	20.7263	19.5966	19.9659	20.7871	21.7831	20.5009
A0A178VSL5_ARATH	tr|A0A178VSL5|A0A178VSL5_ARATH (thale cress) hypothetical protein OS=Arabidopsis thaliana OX=3702 GN=AXX17_At2g37940 PE=1 SV=1	AXX17_At2g37940	41737	2	6.9	2	0.921739	0.0941298	21.5018	21.2786	22.2891	21.7778	22.7601	23.2968
FLA11_ARATH	sp|Q8LEJ6|FLA11_ARATH Fasciclin-like arabinogalactan protein 11 OS=Arabidopsis thaliana OX=3702 GN=FLA11 PE=2 SV=2	FLA11	25592	3	19.11	3	0.9212	0.421461	23.9747	24.594	20.8912	24.9317	23.0429	24.2491
CDPK8_ARATH	sp|Q42438|CDPK8_ARATH Calcium-dependent protein kinase 8 OS=Arabidopsis thaliana OX=3702 GN=CPK8 PE=1 SV=1	CPK8	59941	7	14.07	2	0.92065	0.023543	21.4279	21.9531	22.6006	22.891	22.8409	23.0117
PR1B1_ARATH	sp|Q9LYN0|PR1B1_ARATH PRA1 family protein B1 OS=Arabidopsis thaliana OX=3702 GN=PRA1B1 PE=1 SV=1	PRA1B1	22618	3	23.92	3	0.920635	0.00181301	22.6389	23.1382	23.0924	23.8604	23.9761	23.7949
BIG1_ARATH	sp|F4JSZ5|BIG1_ARATH Brefeldin A-inhibited guanine nucleotide-exchange protein 1 OS=Arabidopsis thaliana OX=3702 GN=BIG1 PE=2 SV=1	BIG1	187537	8	6.58	5	0.91999	0.000995849	21.3638	21.7829	21.7436	22.5694	22.6074	22.4734
CP21A_ARATH	sp|O49605|CP21A_ARATH Peptidyl-prolyl cis-trans isomerase CYP21-1 OS=Arabidopsis thaliana OX=3702 GN=CYP21-1 PE=2 SV=1	CYP21-1	24594	3	17.86	2	0.919681	0.0764351	20.7138	20.7145	20.3169	22.3918	20.7415	21.3709
SF3A1_ARATH	sp|Q8RXF1|SF3A1_ARATH Probable splicing factor 3A subunit 1 OS=Arabidopsis thaliana OX=3702 GN=At1g14650 PE=1 SV=2	At1g14650	87594	4	6.37	4	0.916276	0.114472	21.4426	21.4127	23.1019	22.9916	23.1189	22.5954
STT3B_ARATH	sp|Q9FX21|STT3B_ARATH Dolichyl-diphosphooligosaccharide--protein glycosyltransferase subunit STT3B OS=Arabidopsis thaliana OX=3702 GN=STT3B PE=2 SV=1	STT3B	82980	6	11.56	6	0.914968	0.0788637	23.8224	23.7566	22.3737	23.8983	24.354	24.4454
EPN1_ARATH	sp|Q8VY07|EPN1_ARATH Clathrin interactor EPSIN 1 OS=Arabidopsis thaliana OX=3702 GN=EPSIN1 PE=1 SV=1	EPSIN1	60634	12	28.04	3	0.914551	0.00245645	23.591	23.9324	23.4351	24.7481	24.378	24.576
PORB_ARATH	sp|P21218|PORB_ARATH Protochlorophyllide reductase B, chloroplastic OS=Arabidopsis thaliana OX=3702 GN=PORB PE=1 SV=3	PORB	43359	17	54.36	15	0.912549	0.000955628	26.0983	26.4843	26.1809	27.2406	27.031	27.2295
UKL1_ARATH	sp|Q9FKS0|UKL1_ARATH Uridine/cytidine kinase UKL1, chloroplastic OS=Arabidopsis thaliana OX=3702 GN=UKL1 PE=1 SV=1	UKL1	54430	8	25.1	5	0.91028	0.00842218	22.7542	22.848	22.9991	23.9798	24.0602	23.2922
A0A178V4Q1_ARATH	tr|A0A178V4Q1|A0A178V4Q1_ARATH (thale cress) hypothetical protein OS=Arabidopsis thaliana OX=3702 GN=AXX17_At4g32790 PE=4 SV=1	AXX17_At4g32790	38191	5	32.76	4	0.909517	0.225485	23.156	21.4825	21.1786	23.2536	21.8456	23.4464
MO25M_ARATH	sp|Q9M0M4|MO25M_ARATH Putative MO25-like protein At4g17270 OS=Arabidopsis thaliana OX=3702 GN=At4g17270 PE=2 SV=1	At4g17270	39651	7	18.08	6	0.908567	0.00694848	23.4491	22.9276	23.7492	24.3105	24.2727	24.2683
GLAK1_ARATH	sp|Q93ZC9|GLAK1_ARATH Glucuronokinase 1 OS=Arabidopsis thaliana OX=3702 GN=GLCAK1 PE=1 SV=1	GLCAK1	40076	10	39.78	7	0.908379	0.198846	23.8959	23.6768	21.6077	24.2115	23.7397	23.9543
NU133_ARATH	sp|F4IGA5|NU133_ARATH Nuclear pore complex protein NUP133 OS=Arabidopsis thaliana OX=3702 GN=NUP133 PE=1 SV=1	NUP133	144598	6	7.32	5	0.906528	0.0656728	22.16	21.947	22.7983	22.4816	23.3312	23.8122
A0A654FW96_ARATH	tr|A0A654FW96|A0A654FW96_ARATH Uncharacterized protein OS=Arabidopsis thaliana OX=3702 GN=At4g37210 PE=4 SV=1	At4g37210	52275	7	20.93	6	0.90627	0.162156	23.4039	21.4227	23.4079	23.6423	23.8249	23.486
EXA1_ARATH	sp|Q9FMM3|EXA1_ARATH Protein ESSENTIAL FOR POTEXVIRUS ACCUMULATION 1 OS=Arabidopsis thaliana OX=3702 GN=EXA1 PE=1 SV=1	EXA1	187619	7	6.01	6	0.903946	0.348393	20.6977	19.3873	22.063	20.1977	22.1399	22.5223
PPR58_ARATH	sp|Q9FZD1|PPR58_ARATH Pentatricopeptide repeat-containing protein At1g26460, mitochondrial OS=Arabidopsis thaliana OX=3702 GN=At1g26460 PE=1 SV=1	At1g26460	70235	6	16.98	5	0.903015	0.0496529	22.6465	23.4687	23.2931	23.42	24.105	24.5923
SIP_ARATH	sp|O81062|SIP_ARATH Signal peptide peptidase OS=Arabidopsis thaliana OX=3702 GN=SPP PE=2 SV=1	SPP	38339	4	15.12	4	0.898876	0.0827697	21.6736	22.3456	20.926	23.0765	22.481	22.0843
Q8LFB4_ARATH	tr|Q8LFB4|Q8LFB4_ARATH Uncharacterized protein OS=Arabidopsis thaliana OX=3702 PE=2 SV=1		35167	3	12.89	2	0.895781	0.611418	20.1066	23.4363	24.2737	20.4269	25.1619	24.9152
MOB1A_ARATH	sp|Q9FHI1|MOB1A_ARATH MOB kinase activator-like 1A OS=Arabidopsis thaliana OX=3702 GN=MOB1A PE=1 SV=1	MOB1A	24696	3	17.67	3	0.895379	0.021304	22.8883	22.6135	21.9165	23.5519	23.0849	23.4678
GEM_ARATH	sp|Q8S8F8|GEM_ARATH GLABRA2 expression modulator OS=Arabidopsis thaliana OX=3702 GN=GEM PE=1 SV=1	GEM	32215	8	38.13	7	0.895368	0.0088739	23.3967	24.1554	23.785	24.5414	24.5561	24.9257
Y3IP1_ARATH	sp|Q9LU01|Y3IP1_ARATH Ycf3-interacting protein 1, chloroplastic OS=Arabidopsis thaliana OX=3702 GN=Y3IP1 PE=1 SV=1	Y3IP1	31816	3	20	2	0.894105	0.0561415	23.7052	23.5068	22.3793	23.8743	24.0559	24.3434
A0A178WFJ4_ARATH	tr|A0A178WFJ4|A0A178WFJ4_ARATH S1 motif domain-containing protein OS=Arabidopsis thaliana OX=3702 GN=AXX17_At1g13210 PE=4 SV=1	AXX17_At1g13210	85668	1	1.17	1	0.891116	0.0312026	19.6047	20.5478	20.1734	21.4481	20.6674	20.8839
PNG1_ARATH	sp|Q9FGY9|PNG1_ARATH Peptide-N(4)-(N-acetyl-beta-glucosaminyl)asparagine amidase OS=Arabidopsis thaliana OX=3702 GN=PNG1 PE=2 SV=1	PNG1	82446	6	9.99	4	0.89025	0.00545648	22.4457	22.496	22.2007	23.4925	23.4476	22.873
ILVH1_ARATH	sp|Q9FFF4|ILVH1_ARATH Acetolactate synthase small subunit 1, chloroplastic OS=Arabidopsis thaliana OX=3702 GN=VAT1 PE=1 SV=1	VAT1	52331	3	9.43	2	0.885672	0.0534863	20.5348	21.2629	20.9713	21.5131	21.3747	22.5383
PSD7A_ARATH	sp|O24412|PSD7A_ARATH 26S proteasome non-ATPase regulatory subunit 7 homolog A OS=Arabidopsis thaliana OX=3702 GN=RPN8A PE=1 SV=1	RPN8A	34728	15	75.32	13	0.884185	0.000519491	26.6926	26.7385	26.7747	27.6482	27.4356	27.7746
R13A4_ARATH	sp|Q9FKC0|R13A4_ARATH 60S ribosomal protein L13a-4 OS=Arabidopsis thaliana OX=3702 GN=RPL13AD PE=2 SV=1	RPL13AD	23590	15	51.94	6	0.883893	0.00310916	24.6827	24.9529	25.0801	25.5778	26.0635	25.7261
A0A178V660_ARATH	tr|A0A178V660|A0A178V660_ARATH Protein kinase domain-containing protein OS=Arabidopsis thaliana OX=3702 GN=AXX17_At4g28710 PE=4 SV=1	AXX17_At4g28710	46291	5	19.9	4	0.881827	0.137952	21.0032	23.0046	22.3918	22.8882	22.9092	23.2477
A0A384L2N7_ARATH	tr|A0A384L2N7|A0A384L2N7_ARATH Uncharacterized protein OS=Arabidopsis thaliana OX=3702 GN=AXX17_At3g07250 PE=3 SV=1	AXX17_At3g07250	43599	5	13.27	5	0.878851	0.274924	24.2451	21.7393	21.8691	23.2055	24.0853	23.1993
IMPA4_ARATH	sp|O80480|IMPA4_ARATH Importin subunit alpha-4 OS=Arabidopsis thaliana OX=3702 GN=IMPA4 PE=1 SV=1	IMPA4	59446	14	54.28	10	0.875508	0.00275276	25.546	25.1743	25.769	26.3251	26.3543	26.4364
ZDH22_ARATH	sp|Q52T38|ZDH22_ARATH Protein S-acyltransferase 24 OS=Arabidopsis thaliana OX=3702 GN=PAT24 PE=2 SV=1	PAT24	68234	5	14.19	3	0.873856	0.181994	21.6486	23.3004	21.1608	22.497	23.0409	23.1934
ACOX3_ARATH	sp|P0CZ23|ACOX3_ARATH Acyl-coenzyme A oxidase 3, peroxisomal OS=Arabidopsis thaliana OX=3702 GN=ACX3 PE=1 SV=1	ACX3	75676	24	37.93	22	0.870493	0.0506602	25.722	25.7038	25.4614	25.7055	26.8174	26.9758
CRR55_ARATH	sp|Q9LV60|CRR55_ARATH Cysteine-rich repeat secretory protein 55 OS=Arabidopsis thaliana OX=3702 GN=CRRSP55 PE=2 SV=1	CRRSP55	28995	5	23.19	5	0.867028	0.00115257	23.4708	23.0824	23.385	24.2512	24.2286	24.0594
CLC3_ARATH	sp|F4J5M9|CLC3_ARATH Clathrin light chain 3 OS=Arabidopsis thaliana OX=3702 GN=At3g51890 PE=1 SV=1	At3g51890	29183	5	25.19	4	0.865678	0.0418912	22.3746	23.1964	23.6731	23.9789	23.8609	24.0014
MNS1_ARATH	sp|Q9C512|MNS1_ARATH Mannosyl-oligosaccharide 1,2-alpha-mannosidase MNS1 OS=Arabidopsis thaliana OX=3702 GN=MNS1 PE=1 SV=1	MNS1	63532	7	16.43	5	0.865372	0.101638	21.8173	23.5244	22.6095	23.8289	23.463	23.2554
AOC3_ARATH	sp|Q9LS01|AOC3_ARATH Allene oxide cyclase 3, chloroplastic OS=Arabidopsis thaliana OX=3702 GN=AOC3 PE=2 SV=1	AOC3	28398	10	41.47	6	0.865022	0.000332305	25.5782	25.4137	25.5981	26.4816	26.3945	26.3089
RS122_ARATH	sp|Q9SKZ3|RS122_ARATH 40S ribosomal protein S12-2 OS=Arabidopsis thaliana OX=3702 GN=RPS12C PE=1 SV=1	RPS12C	15329	6	40.97	4	0.864454	0.113645	22.9963	23.1838	23.3934	25.1054	23.6815	23.38
PER32_ARATH	sp|Q9LHB9|PER32_ARATH Peroxidase 32 OS=Arabidopsis thaliana OX=3702 GN=PER32 PE=1 SV=3	PER32	38847	9	25	2	0.861117	0.00297018	21.7821	22.042	21.7324	22.8937	22.4197	22.8264
A0A178UX78_ARATH	tr|A0A178UX78|A0A178UX78_ARATH Adenylosuccinate lyase OS=Arabidopsis thaliana OX=3702 GN=AXX17_At4g21680 PE=3 SV=1	AXX17_At4g21680	59734	15	38.81	14	0.859765	0.00302746	25.8251	26.0525	25.5364	26.8534	26.5892	26.5507
NRPB2_ARATH	sp|P38420|NRPB2_ARATH DNA-directed RNA polymerase II subunit 2 OS=Arabidopsis thaliana OX=3702 GN=NRPB2 PE=1 SV=2	NRPB2	135019	14	14.56	11	0.857108	0.0699857	23.4356	24.2401	22.698	24.2384	24.4198	24.2868
PDI16_ARATH	sp|Q66GQ3|PDI16_ARATH Protein disulfide isomerase-like 1-6 OS=Arabidopsis thaliana OX=3702 GN=PDIL1-6 PE=2 SV=1	PDIL1-6	59571	16	37.45	14	0.855918	0.00238206	24.9356	24.5888	25.1341	25.6684	25.7649	25.7931
A0A178VTB4_ARATH	tr|A0A178VTB4|A0A178VTB4_ARATH Protein kinase domain-containing protein OS=Arabidopsis thaliana OX=3702 GN=AXX17_At2g29260 PE=4 SV=1	AXX17_At2g29260	74511	8	14.63	8	0.854842	0.21048	23.905	22.0868	22.8401	23.8094	24.6384	22.9486
RB47A_ARATH	sp|F4I3B3|RB47A_ARATH Polyadenylate-binding protein RBP47A OS=Arabidopsis thaliana OX=3702 GN=RBP47A PE=2 SV=1	RBP47A	48483	3	4.72	2	0.851964	0.111253	21.3784	22.3163	21.2922	21.8683	23.2973	22.3772
UFSP_ARATH	sp|Q9STL8|UFSP_ARATH Probable Ufm1-specific protease OS=Arabidopsis thaliana OX=3702 GN=At3g48380 PE=1 SV=2	At3g48380	71466	5	10.7	4	0.851715	0.018636	22.1023	22.101	22.641	23.3053	23.4203	22.6738
Y3515_ARATH	sp|Q94BY1|Y3515_ARATH Uncharacterized protein At3g52155, chloroplastic OS=Arabidopsis thaliana OX=3702 GN=At3g52155 PE=1 SV=1	At3g52155	23588	1	10.09	1	0.851316	0.00295323	20.4938	20.8724	20.6867	21.5218	21.7752	21.3098
A0A178VMJ6_ARATH	tr|A0A178VMJ6|A0A178VMJ6_ARATH Uncharacterized protein OS=Arabidopsis thaliana OX=3702 GN=AXX17_At2g10980 PE=1 SV=1	AXX17_At2g10980	55575	14	39.65	12	0.850399	0.000289378	24.3111	24.3197	24.1999	25.0883	25.0602	25.2333
A0A1I9LTL7_ARATH	tr|A0A1I9LTL7|A0A1I9LTL7_ARATH Evolutionarily conserved C-terminal region 5 OS=Arabidopsis thaliana OX=3702 GN=ECT5 PE=1 SV=1	ECT5	68466	10	25.32	7	0.848936	0.00072933	23.8268	23.7585	24.0203	24.5709	24.7876	24.7939
PUR3_ARATH	sp|P52422|PUR3_ARATH Phosphoribosylglycinamide formyltransferase, chloroplastic OS=Arabidopsis thaliana OX=3702 GN=PUR3 PE=2 SV=2	PUR3	32170	6	26.71	5	0.84702	0.00639415	23.4203	23.8021	23.9424	24.3331	24.8424	24.5303
A0A178UPG8_ARATH	tr|A0A178UPG8|A0A178UPG8_ARATH (thale cress) hypothetical protein OS=Arabidopsis thaliana OX=3702 GN=At5g52210 PE=3 SV=1	At5g52210	23141	3	19.02	2	0.845154	0.0270242	21.6668	22.5714	21.6208	22.8656	22.9242	22.6046
SC13B_ARATH	sp|O64740|SC13B_ARATH Protein transport protein SEC13 homolog B OS=Arabidopsis thaliana OX=3702 GN=SEC13B PE=1 SV=1	SEC13B	32642	12	60.6	9	0.844953	0.00196438	24.8255	25.2253	24.9769	25.9519	25.6613	25.9494
RL272_ARATH	sp|Q8LCL3|RL272_ARATH 60S ribosomal protein L27-2 OS=Arabidopsis thaliana OX=3702 GN=RPL27B PE=2 SV=2	RPL27B	15615	7	34.07	3	0.842006	0.183871	22.3862	24.571	24.0194	24.3861	24.6003	24.5162
GL21_ARATH	sp|P94014|GL21_ARATH Germin-like protein subfamily 2 member 1 OS=Arabidopsis thaliana OX=3702 GN=GLP4 PE=2 SV=2	GLP4	22868	4	14.61	2	0.841729	0.240014	21.4085	23.247	23.958	23.6872	23.6252	23.8263
GP210_ARATH	sp|F4KHD8|GP210_ARATH Nuclear pore complex protein GP210 OS=Arabidopsis thaliana OX=3702 GN=GB210 PE=1 SV=1	GB210	210666	7	5.56	6	0.840629	0.0747517	22.3835	23.1453	23.443	23.4539	24.4692	23.5706
ORP3B_ARATH	sp|Q9SR33|ORP3B_ARATH Oxysterol-binding protein-related protein 3B OS=Arabidopsis thaliana OX=3702 GN=ORP3B PE=2 SV=1	ORP3B	51956	6	20.52	4	0.839995	0.157357	23.1197	21.9898	24.0693	23.8519	24.0908	23.756
MOS1_ARATH	sp|Q9SB63|MOS1_ARATH Protein MODIFIER OF SNC1 1 OS=Arabidopsis thaliana OX=3702 GN=MOS1 PE=1 SV=2	MOS1	153687	4	4.18	4	0.836016	0.291087	20.4859	20.4385	22.0522	20.7814	23.0782	21.6251
PMAT2_ARATH	sp|Q9LRQ8|PMAT2_ARATH Phenolic glucoside malonyltransferase 2 OS=Arabidopsis thaliana OX=3702 GN=PMAT2 PE=1 SV=1	PMAT2	50217	11	31.04	8	0.8358	0.128272	24.8978	25.0854	25.0289	26.4383	26.3402	24.7411
WDL3_ARATH	sp|Q84WL6|WDL3_ARATH Protein WVD2-like 3 OS=Arabidopsis thaliana OX=3702 GN=WDL3 PE=1 SV=1	WDL3	37782	4	16.27	4	0.830943	0.21204	21.4229	22.5785	23.8067	23.4336	23.206	23.6614
TI214_ARATH	sp|P56785|TI214_ARATH Protein TIC 214 OS=Arabidopsis thaliana OX=3702 GN=TIC214 PE=1 SV=1	TIC214	213728	19	12.26	17	0.828036	0.00548787	24.9456	25.5161	25.1955	25.9386	25.9297	26.2729
CGR2_ARATH	sp|Q9M2Y6|CGR2_ARATH Probable pectin methylesterase CGR2 OS=Arabidopsis thaliana OX=3702 GN=CGR2 PE=2 SV=1	CGR2	28532	8	51.72	7	0.826768	0.00128664	25.279	25.1944	25.4401	26.3279	26.092	25.9739
GXM1_ARATH	sp|Q6NMK1|GXM1_ARATH Glucuronoxylan 4-O-methyltransferase 1 OS=Arabidopsis thaliana OX=3702 GN=GXM1 PE=1 SV=1	GXM1	31883	9	52.84	8	0.822967	0.00371173	24.5115	25.043	24.596	25.4263	25.5454	25.6477
TRPD_ARATH	sp|Q02166|TRPD_ARATH Anthranilate phosphoribosyltransferase, chloroplastic OS=Arabidopsis thaliana OX=3702 GN=PAT1 PE=2 SV=1	PAT1	46520	14	50.23	12	0.819733	0.0014393	25.6595	25.3524	25.6566	26.3346	26.5309	26.2621
OHP2_ARATH	sp|Q9FEC1|OHP2_ARATH Light-harvesting complex-like protein OHP2, chloroplastic OS=Arabidopsis thaliana OX=3702 GN=OHP2 PE=1 SV=1	OHP2	18665	3	21.51	3	0.81956	0.00561222	24.195	23.95	23.7171	25.0301	24.5362	24.7544
ORANG_ARATH	sp|Q9FKF4|ORANG_ARATH Protein ORANGE, chloroplastic OS=Arabidopsis thaliana OX=3702 GN=OR PE=1 SV=1	OR	33790	3	10.75	2	0.819414	0.152467	20.9905	22.1542	22.8247	23.0197	22.3399	23.068
RER1_ARATH	sp|Q9FGP9|RER1_ARATH Protein RETICULATA-RELATED 1, chloroplastic OS=Arabidopsis thaliana OX=3702 GN=RER1 PE=1 SV=1	RER1	46832	5	12.93	2	0.816039	0.0271459	21.7038	21.5264	21.3704	22.9312	22.166	21.9514
MPK8_ARATH	sp|Q9LM33|MPK8_ARATH Mitogen-activated protein kinase 8 OS=Arabidopsis thaliana OX=3702 GN=MPK8 PE=1 SV=2	MPK8	66231	6	15.45	6	0.814141	0.152177	21.2087	21.9523	21.6833	23.5057	21.9052	21.8758
CWP04_ARATH	sp|P80828|CWP04_ARATH 54 kDa cell wall protein (Fragment) OS=Arabidopsis thaliana OX=3702 PE=1 SV=1		2245	1	45	1	0.813992	0.000318032	24.323	24.3293	24.394	25.0747	25.1509	25.2627
RL191_ARATH	sp|Q9SRX2|RL191_ARATH 60S ribosomal protein L19-1 OS=Arabidopsis thaliana OX=3702 GN=RPL19A PE=2 SV=1	RPL19A	24606	10	37.85	9	0.811297	0.0174715	25.41	26.1563	25.6111	26.5086	26.821	26.2817
A0A178UA90_ARATH	tr|A0A178UA90|A0A178UA90_ARATH Uncharacterized protein OS=Arabidopsis thaliana OX=3702 GN=AXX17_At5g21810 PE=1 SV=1	AXX17_At5g21810	54077	1	2.03	1	0.810048	0.00370523	19.8905	20.2361	20.3014	21.1539	20.7496	20.9546
MIND1_ARATH	sp|Q9MBA2|MIND1_ARATH Septum site-determining protein minD homolog, chloroplastic OS=Arabidopsis thaliana OX=3702 GN=MIND1 PE=1 SV=1	MIND1	35690	7	29.45	7	0.808695	0.0856749	22.7287	24.1659	23.8072	24.5927	24.1133	24.422
A0A7G2ER20_ARATH	tr|A0A7G2ER20|A0A7G2ER20_ARATH Glutamate decarboxylase OS=Arabidopsis thaliana OX=3702 GN=AT9943_LOCUS11328 PE=3 SV=1	AT9943_LOCUS11328	119089	13	12.89	4	0.80576	0.283128	22.2674	21.1209	22.5462	23.3165	23.6023	21.433
COPB2_ARATH	sp|Q9SV20|COPB2_ARATH Coatomer subunit beta-2 OS=Arabidopsis thaliana OX=3702 GN=At4g31490 PE=2 SV=2	At4g31490	106078	66	62.45	6	0.805623	0.00484973	23.6607	24.2855	24.0511	24.8681	24.7402	24.8058
SYPM_ARATH	sp|Q9FYR6|SYPM_ARATH Proline--tRNA ligase, chloroplastic/mitochondrial OS=Arabidopsis thaliana OX=3702 GN=OVA6 PE=2 SV=1	OVA6	60747	18	52.67	15	0.804954	0.00489846	25.3722	25.2688	24.9553	25.9112	26.2749	25.8251
Q94JY3_ARATH	tr|Q94JY3|Q94JY3_ARATH Alpha/beta-Hydrolases superfamily protein OS=Arabidopsis thaliana OX=3702 GN=MDB19.5 PE=1 SV=1	MDB19.5	26530	11	64.85	10	0.801492	0.00033211	25.5854	25.6405	25.487	26.4422	26.3281	26.3472
ZCIS_ARATH	sp|Q9SAC0|ZCIS_ARATH 15-cis-zeta-carotene isomerase, chloroplastic OS=Arabidopsis thaliana OX=3702 GN=Z-ISO PE=1 SV=1	Z-ISO	40851	1	3.54	1	0.801312	0.0553069	21.3501	21.4941	20.9643	21.3699	22.4329	22.4097
PFPA2_ARATH	sp|Q9C9K3|PFPA2_ARATH Pyrophosphate--fructose 6-phosphate 1-phosphotransferase subunit alpha 2 OS=Arabidopsis thaliana OX=3702 GN=PFP-ALPHA2 PE=2 SV=1	PFP-ALPHA2	67559	34	64.18	18	0.801269	0.0017686	26.5658	26.9136	26.7698	27.4698	27.456	27.7271
FOLD1_ARATH	sp|A2RVV7|FOLD1_ARATH Bifunctional protein FolD 1, mitochondrial OS=Arabidopsis thaliana OX=3702 GN=FOLD1 PE=2 SV=1	FOLD1	38048	2	8.52	2	0.800129	0.0819382	21.2896	21.0454	19.9883	21.1988	21.785	21.7399
AGD8_ARATH	sp|Q8H100|AGD8_ARATH Probable ADP-ribosylation factor GTPase-activating protein AGD8 OS=Arabidopsis thaliana OX=3702 GN=AGD8 PE=1 SV=1	AGD8	44441	11	30.02	7	0.798954	0.0131258	24.382	25.0658	24.2906	25.4042	25.4042	25.3269
D1861_ARATH	sp|Q94AD1|D1861_ARATH Putative DNA-binding protein At1g48610 OS=Arabidopsis thaliana OX=3702 GN=At1g48610 PE=1 SV=1	At1g48610	21674	14	66.98	13	0.798225	0.0151586	25.2215	25.7385	25.0112	26.3509	26.1402	25.8748
HPCA1_ARATH	sp|Q8GZ99|HPCA1_ARATH Leucine-rich repeat receptor protein kinase HPCA1 OS=Arabidopsis thaliana OX=3702 GN=HPCA1 PE=1 SV=1	HPCA1	104708	15	19.1	10	0.797778	0.0372301	25.2539	24.3463	25.3623	25.9765	25.7017	25.6777
A0A178WBF3_ARATH	tr|A0A178WBF3|A0A178WBF3_ARATH (thale cress) hypothetical protein OS=Arabidopsis thaliana OX=3702 GN=AXX17_At1g10200 PE=4 SV=1	AXX17_At1g10200	18374	5	40.12	5	0.796572	0.293992	22.2774	22.1279	20.3018	22.3679	21.4675	23.2614
P4H7_ARATH	sp|Q8L970|P4H7_ARATH Probable prolyl 4-hydroxylase 7 OS=Arabidopsis thaliana OX=3702 GN=P4H7 PE=2 SV=1	P4H7	35570	5	20.89	4	0.795557	0.177174	21.3451	21.5324	21.9905	22.7181	21.2996	23.2371
A0A178UPM8_ARATH	tr|A0A178UPM8|A0A178UPM8_ARATH (thale cress) hypothetical protein OS=Arabidopsis thaliana OX=3702 GN=AXX17_At5g64310 PE=3 SV=1	AXX17_At5g64310	31200	2	8.9	2	0.794029	0.110367	20.1932	21.405	20.4312	21.0669	22.1102	21.2345
TA15B_ARATH	sp|Q94KD0|TA15B_ARATH Transcription initiation factor TFIID subunit 15b OS=Arabidopsis thaliana OX=3702 GN=TAF15B PE=1 SV=1	TAF15B	42316	3	9.95	3	0.785371	0.150158	21.4445	20.4145	22.219	21.8234	22.4793	22.1314
LUT5_ARATH	sp|Q93VK5|LUT5_ARATH Protein LUTEIN DEFICIENT 5, chloroplastic OS=Arabidopsis thaliana OX=3702 GN=CYP97A3 PE=1 SV=1	CYP97A3	66846	2	4.54	2	0.784987	0.0465356	20.7666	20.8468	20.775	21.0263	22.2393	21.4778
A0A178UXQ4_ARATH	tr|A0A178UXQ4|A0A178UXQ4_ARATH EMB140 OS=Arabidopsis thaliana OX=3702 GN=AXX17_At4g28130 PE=4 SV=1	AXX17_At4g28130	92781	4	7.23	4	0.784484	0.190237	20.8058	20.8646	20.5207	21.2017	20.6427	22.7001
GSTF2_ARATH	sp|P46422|GSTF2_ARATH Glutathione S-transferase F2 OS=Arabidopsis thaliana OX=3702 GN=GSTF2 PE=1 SV=3	GSTF2	24129	29	95.28	28	0.783802	0.0077334	30.6508	30.655	31.2074	31.6627	31.4486	31.7534
A0A178VW87_ARATH	tr|A0A178VW87|A0A178VW87_ARATH Uncharacterized protein OS=Arabidopsis thaliana OX=3702 GN=At2g33410 PE=4 SV=1	At2g33410	41329	5	19.8	3	0.782987	0.000429707	23.3397	23.235	23.398	24.0317	24.1105	24.1795
TBL3_ARATH	sp|Q8LED3|TBL3_ARATH Protein trichome birefringence-like 3 OS=Arabidopsis thaliana OX=3702 GN=TBL3 PE=2 SV=1	TBL3	49829	1	2.3	1	0.78175	0.0167898	20.1659	20.7287	20.4141	21.2447	20.8597	21.5495
TMN3_ARATH	sp|Q9ZPS7|TMN3_ARATH Transmembrane 9 superfamily member 3 OS=Arabidopsis thaliana OX=3702 GN=TMN3 PE=2 SV=1	TMN3	68049	16	34.97	15	0.781679	0.00210187	26.5612	26.5425	26.1603	27.208	27.1327	27.2683
SYDC1_ARATH	sp|Q8H104|SYDC1_ARATH Aspartate--tRNA ligase 1, cytoplasmic OS=Arabidopsis thaliana OX=3702 GN=At4g26870 PE=2 SV=1	At4g26870	60333	15	33.27	10	0.781463	0.00736152	24.2843	23.8171	24.2474	24.6347	24.9739	25.0846
U78D1_ARATH	sp|Q9S9P6|U78D1_ARATH Flavonol-3-O-rhamnosyltransferase OS=Arabidopsis thaliana OX=3702 GN=UGT78D1 PE=1 SV=1	UGT78D1	50095	9	29.8	9	0.778894	0.0020104	23.587	24.0132	23.8956	24.6753	24.6219	24.5354
SRP19_ARATH	sp|Q943Z6|SRP19_ARATH Signal recognition particle 19 kDa protein OS=Arabidopsis thaliana OX=3702 GN=SRP19 PE=1 SV=1	SRP19	16274	5	38.62	4	0.774558	0.000826001	22.6245	22.765	22.8954	23.4395	23.5865	23.5826
A0A178UMR6_ARATH	tr|A0A178UMR6|A0A178UMR6_ARATH Uncharacterized protein OS=Arabidopsis thaliana OX=3702 GN=AXX17_At5g28100 PE=4 SV=1	AXX17_At5g28100	180701	2	2.51	2	0.774084	0.26898	19.0751	21.2734	20.0562	21.421	20.1246	21.1813
PEX14_ARATH	sp|Q9FXT6|PEX14_ARATH Peroxisomal membrane protein PEX14 OS=Arabidopsis thaliana OX=3702 GN=PEX14 PE=1 SV=2	PEX14	55595	5	15.19	2	0.772129	0.171144	22.0299	20.5365	20.6762	22.1532	21.1873	22.2186
SGPL_ARATH	sp|Q9C509|SGPL_ARATH Sphingosine-1-phosphate lyase OS=Arabidopsis thaliana OX=3702 GN=DPL1 PE=1 SV=1	DPL1	59478	5	15.26	5	0.769208	0.114296	22.8951	23.554	23.767	24.7916	23.4113	24.3209
GSTF3_ARATH	sp|Q9SLM6|GSTF3_ARATH Glutathione S-transferase F3 OS=Arabidopsis thaliana OX=3702 GN=GSTF3 PE=2 SV=1	GSTF3	24121	18	62.74	2	0.768988	0.0623194	22.5903	23.71	23.7614	24.0684	24.168	24.1322
INVA4_ARATH	sp|Q39041|INVA4_ARATH Acid beta-fructofuranosidase 4, vacuolar OS=Arabidopsis thaliana OX=3702 GN=BFRUCT4 PE=1 SV=2	BFRUCT4	73844	18	34.34	15	0.767873	0.0018818	26.824	26.7201	26.6967	27.5492	27.2902	27.705
RL223_ARATH	sp|Q9FE58|RL223_ARATH 60S ribosomal protein L22-3 OS=Arabidopsis thaliana OX=3702 GN=RPL22C PE=2 SV=1	RPL22C	14047	14	62.9	2	0.766419	0.00240801	25.8777	25.8934	26.0596	26.96	26.6031	26.567
FTSH3_ARATH	sp|Q84WU8|FTSH3_ARATH ATP-dependent zinc metalloprotease FTSH 3, mitochondrial OS=Arabidopsis thaliana OX=3702 GN=FTSH3 PE=1 SV=1	FTSH3	89353	9	19.16	8	0.764705	0.0252189	23.7348	23.8305	24.2251	24.73	25.0932	24.2613
A0A178VQ75_ARATH	tr|A0A178VQ75|A0A178VQ75_ARATH Uncharacterized protein OS=Arabidopsis thaliana OX=3702 GN=AXX17_At3g18960 PE=4 SV=1	AXX17_At3g18960	91641	6	10.86	4	0.764023	0.114484	23.5029	21.9849	23.1015	23.6422	23.3528	23.8862
BSL2_ARATH	sp|Q9SJF0|BSL2_ARATH Serine/threonine-protein phosphatase BSL2 OS=Arabidopsis thaliana OX=3702 GN=BSL2 PE=1 SV=2	BSL2	108580	18	27.11	14	0.760301	0.00956373	25.0276	25.117	25.2096	25.4743	26.0318	26.129
A0A7G2EX61_ARATH	tr|A0A7G2EX61|A0A7G2EX61_ARATH (thale cress) hypothetical protein OS=Arabidopsis thaliana OX=3702 GN=AT9943_LOCUS14375 PE=4 SV=1	AT9943_LOCUS14375	81963	15	25.67	13	0.757109	0.145085	25.7085	26.1442	25.5071	25.9758	27.5235	26.1318
PMT1_ARATH	sp|Q8H118|PMT1_ARATH Probable methyltransferase PMT1 OS=Arabidopsis thaliana OX=3702 GN=At3g23300 PE=2 SV=2	At3g23300	69356	18	36.66	15	0.756001	0.000631722	25.3242	25.2781	25.2208	26.0217	26.1514	25.918
LEUD1_ARATH	sp|Q9ZW84|LEUD1_ARATH 3-isopropylmalate dehydratase small subunit 2 OS=Arabidopsis thaliana OX=3702 GN=SSU2 PE=1 SV=1	SSU2	27043	11	66.02	8	0.755053	0.0115731	24.6106	25.1299	25.3277	25.6971	25.8853	25.751
A0A178WEW1_ARATH	tr|A0A178WEW1|A0A178WEW1_ARATH J domain-containing protein OS=Arabidopsis thaliana OX=3702 GN=AXX17_At1g19630 PE=4 SV=1	AXX17_At1g19630	79004	8	16.29	5	0.753912	0.540824	21.5418	17.841	22.0204	21.8601	20.4261	21.3788
A0A654EL92_ARATH	tr|A0A654EL92|A0A654EL92_ARATH Aldo_ket_red domain-containing protein OS=Arabidopsis thaliana OX=3702 GN=At1g59960 PE=4 SV=1	At1g59960	36730	8	31.9	6	0.753844	0.0464458	23.2598	23.8102	24.3038	24.2364	24.7279	24.671
A0A5S9WTY3_ARATH	tr|A0A5S9WTY3|A0A5S9WTY3_ARATH ATPase_AAA_core domain-containing protein OS=Arabidopsis thaliana OX=3702 GN=At1g73110 PE=3 SV=1	At1g73110	48325	7	24.07	6	0.752126	0.0777456	22.4458	23.7511	22.7917	23.5944	23.6929	23.9576
AGM1_ARATH	sp|P57750|AGM1_ARATH Phosphoacetylglucosamine mutase OS=Arabidopsis thaliana OX=3702 GN=DRT101 PE=1 SV=1	DRT101	60391	2	3.78	2	0.752101	0.0683088	22.6843	21.6524	22.0625	23.2428	22.4196	22.9931
GMAN2_ARATH	sp|Q9LFR0|GMAN2_ARATH Alpha-mannosidase 2 OS=Arabidopsis thaliana OX=3702 GN=GMII PE=1 SV=1	GMII	134726	19	22.08	14	0.751762	0.00415015	24.4281	24.1172	24.0458	24.7335	25.021	25.0919
TI172_ARATH	sp|Q9SP35|TI172_ARATH Mitochondrial import inner membrane translocase subunit TIM17-2 OS=Arabidopsis thaliana OX=3702 GN=TIM17-2 PE=1 SV=2	TIM17-2	25571	2	11.11	1	0.750228	0.0257056	20.7093	20.4977	20.2179	21.5801	20.7675	21.328
Q7M1L1_ARATH	tr|Q7M1L1|Q7M1L1_ARATH Chlorophyll a-b binding protein, chloroplastic (Fragments) OS=Arabidopsis thaliana OX=3702 PE=3 SV=1		5503	3	50	1	0.748897	0.0163085	22.3248	22.333	23.0556	23.3036	23.3158	23.3408
AB8I_ARATH	sp|Q9ZS97|AB8I_ARATH UPF0051 protein ABCI8, chloroplastic OS=Arabidopsis thaliana OX=3702 GN=ABCI8 PE=2 SV=1	ABCI8	61868	8	17.06	6	0.746711	0.0641006	22.4586	23.5893	23.3062	24.1801	23.6786	23.7355
AKRC9_ARATH	sp|Q0PGJ6|AKRC9_ARATH NADPH-dependent aldo-keto reductase, chloroplastic OS=Arabidopsis thaliana OX=3702 GN=AKR4C9 PE=1 SV=1	AKR4C9	35137	6	32.38	5	0.745709	0.0691129	22.7388	22.1627	21.463	22.9389	22.6538	23.0089
DNJA6_ARATH	sp|Q9SJZ7|DNJA6_ARATH Chaperone protein dnaJ A6, chloroplastic OS=Arabidopsis thaliana OX=3702 GN=DJA6 PE=2 SV=2	DJA6	47761	4	13.57	2	0.743699	0.00626994	20.225	19.8317	20.1735	20.7024	20.6769	21.082
BCB1_ARATH	sp|Q07488|BCB1_ARATH Blue copper protein OS=Arabidopsis thaliana OX=3702 GN=BCB PE=2 SV=2	BCB	20054	2	14.8	2	0.743225	0.0658261	23.1904	22.9521	22.5428	24.0242	22.9912	23.8995
A0A178WEV1_ARATH	tr|A0A178WEV1|A0A178WEV1_ARATH (thale cress) hypothetical protein OS=Arabidopsis thaliana OX=3702 GN=AXX17_At1g71990 PE=4 SV=1	AXX17_At1g71990	42793	6	20.42	4	0.742382	0.231256	20.9671	21.2136	22.8456	21.8599	22.8104	22.5832
DNJ50_ARATH	sp|Q8GUN6|DNJ50_ARATH Chaperone protein dnaJ 50 OS=Arabidopsis thaliana OX=3702 GN=C50 PE=2 SV=1	C50	34952	3	17	2	0.738683	0.0211611	21.3305	21.181	21.7459	22.5481	21.9689	21.9565
CRSP_ARATH	sp|Q9LNU1|CRSP_ARATH CO(2)-response secreted protease OS=Arabidopsis thaliana OX=3702 GN=CRSP PE=2 SV=1	CRSP	81480	4	8.19	3	0.737822	0.0723133	21.4413	21.4418	21.1925	22.163	21.4119	22.7142
ACA1_ARATH	sp|Q37145|ACA1_ARATH Calcium-transporting ATPase 1 OS=Arabidopsis thaliana OX=3702 GN=ACA1 PE=1 SV=3	ACA1	111261	7	10.2	7	0.73779	0.255432	22.5379	24.1785	23.7131	23.7348	25.1932	23.7149
CYT4_ARATH	sp|Q84WT8|CYT4_ARATH Cysteine proteinase inhibitor 4 OS=Arabidopsis thaliana OX=3702 GN=CYS4 PE=3 SV=2	CYS4	12556	4	28.21	4	0.737647	0.041044	24.3193	23.7274	23.9079	25.1523	24.7764	24.2388
A0A178V0U8_ARATH	tr|A0A178V0U8|A0A178V0U8_ARATH Uncharacterized protein OS=Arabidopsis thaliana OX=3702 GN=AXX17_At4g45230 PE=4 SV=1	AXX17_At4g45230	46287	7	21.57	6	0.736497	0.0323772	22.4252	23.1556	23.3347	23.551	23.8775	23.6965
A0A654F5I3_ARATH	tr|A0A654F5I3|A0A654F5I3_ARATH ACB domain-containing protein OS=Arabidopsis thaliana OX=3702 GN=AN1_LOCUS11844 PE=3 SV=1	AN1_LOCUS11844	73237	33	69.06	31	0.733656	0.00619471	26.8101	26.3097	26.8061	27.468	27.2691	27.3898
A0A178VDI0_ARATH	tr|A0A178VDI0|A0A178VDI0_ARATH Small nuclear ribonucleoprotein Sm D2 OS=Arabidopsis thaliana OX=3702 GN=At2g47640 PE=3 SV=1	At2g47640	12191	3	27.62	3	0.733065	0.0544659	23.9142	22.8368	23.6673	24.017	24.1742	24.4264
FLA8_ARATH	sp|O22126|FLA8_ARATH Fasciclin-like arabinogalactan protein 8 OS=Arabidopsis thaliana OX=3702 GN=FLA8 PE=2 SV=1	FLA8	43075	7	23.57	7	0.730485	0.647484	24.9251	25.0251	21.324	26.6063	24.8613	21.998
P4H10_ARATH	sp|F4JZ24|P4H10_ARATH Probable prolyl 4-hydroxylase 10 OS=Arabidopsis thaliana OX=3702 GN=P4H10 PE=3 SV=1	P4H10	32598	5	28.72	4	0.72745	0.200519	22.3157	21.9169	23.0645	22.1841	23.6656	23.6298
RH3_ARATH	sp|Q8L7S8|RH3_ARATH DEAD-box ATP-dependent RNA helicase 3, chloroplastic OS=Arabidopsis thaliana OX=3702 GN=RH3 PE=1 SV=2	RH3	81156	9	16.04	8	0.727303	0.0273663	23.2532	23.7439	24.0681	24.6761	24.3684	24.2025
NACA2_ARATH	sp|Q94JX9|NACA2_ARATH Nascent polypeptide-associated complex subunit alpha-like protein 2 OS=Arabidopsis thaliana OX=3702 GN=At3g49470 PE=2 SV=2	At3g49470	23712	7	32.72	7	0.725206	0.00131164	23.9771	23.9284	24.1014	24.8335	24.5636	24.7854
A0A178UVJ3_ARATH	tr|A0A178UVJ3|A0A178UVJ3_ARATH Uncharacterized protein OS=Arabidopsis thaliana OX=3702 GN=AXX17_At4g45400 PE=3 SV=1	AXX17_At4g45400	48013	6	17	4	0.724566	0.0375792	23.1847	22.7724	23.7143	24.1656	23.967	23.7125
IPYR4_ARATH	sp|Q9LFF9|IPYR4_ARATH Soluble inorganic pyrophosphatase 4 OS=Arabidopsis thaliana OX=3702 GN=PPA4 PE=1 SV=1	PPA4	24576	5	33.33	1	0.7226	0.0808276	22.2011	22.6305	22.8683	22.7091	23.2658	23.8928
TOM92_ARATH	sp|Q9FNC9|TOM92_ARATH Mitochondrial import receptor subunit TOM9-2 OS=Arabidopsis thaliana OX=3702 GN=TOM9-2 PE=1 SV=3	TOM9-2	10378	3	23.23	3	0.721569	0.00815568	23.8287	23.7473	23.2381	24.3718	24.3386	24.2685
HBL2_ARATH	sp|O24521|HBL2_ARATH Non-symbiotic hemoglobin 2 OS=Arabidopsis thaliana OX=3702 GN=AHB2 PE=1 SV=1	AHB2	17871	1	10.76	1	0.721491	0.00635917	20.644	21.1865	20.8967	21.5373	21.7761	21.5782
A0A7G2F0J1_ARATH	tr|A0A7G2F0J1|A0A7G2F0J1_ARATH (thale cress) hypothetical protein OS=Arabidopsis thaliana OX=3702 GN=AT9943_LOCUS16537 PE=4 SV=1	AT9943_LOCUS16537	67963	3	6.72	3	0.720871	0.363024	20.708	22.3907	21.9555	23.0484	20.9951	23.1733
NDK4_ARATH	sp|Q8LAH8|NDK4_ARATH Nucleoside diphosphate kinase IV, chloroplastic/mitochondrial OS=Arabidopsis thaliana OX=3702 GN=NDK4 PE=1 SV=2	NDK4	25773	10	35.44	4	0.720773	0.00483597	24.3465	23.9883	24.3065	25.0627	25.0267	24.7142
COG4_ARATH	sp|Q8L838|COG4_ARATH Conserved oligomeric Golgi complex subunit 4 OS=Arabidopsis thaliana OX=3702 GN=COG4 PE=1 SV=1	COG4	82978	9	15.04	7	0.720626	0.0226982	23.9013	24.1033	24.4657	25.0261	24.4893	25.1167
ATP6A_ARATH	sp|P0DO44|ATP6A_ARATH ATP synthase small subunit 6-A, mitochondrial OS=Arabidopsis thaliana OX=3702 GN=ATP6 PE=2 SV=1	ATP6	6585	2	40	2	0.719492	0.0497428	22.9834	22.3889	22.2348	23.473	23.512	22.7805
FOLM_ARATH	sp|Q9SZV3|FOLM_ARATH Folate synthesis bifunctional protein, mitochondrial OS=Arabidopsis thaliana OX=3702 GN=MitHPPK/DHPS PE=2 SV=1	MitHPPK/DHPS	60738	7	22.02	5	0.719148	0.0566279	22.8938	22.7158	23.2758	23.8129	24.1256	23.1043
A0A654F8E2_ARATH	tr|A0A654F8E2|A0A654F8E2_ARATH Dipeptide epimerase OS=Arabidopsis thaliana OX=3702 GN=AN1_LOCUS13231 PE=3 SV=1	AN1_LOCUS13231	44636	4	11.95	4	0.718977	0.190527	21.3755	22.9794	22.0773	22.2577	22.9351	23.3964
CP21D_ARATH	sp|Q9C835|CP21D_ARATH Peptidyl-prolyl cis-trans isomerase CYP21-4 OS=Arabidopsis thaliana OX=3702 GN=CYP21-4 PE=2 SV=1	CYP21-4	26427	9	58.05	9	0.718292	0.00237838	24.9058	24.8386	25.1766	25.5658	25.7914	25.7187
TBL33_ARATH	sp|F4IH21|TBL33_ARATH Protein trichome birefringence-like 33 OS=Arabidopsis thaliana OX=3702 GN=TBL33 PE=2 SV=1	TBL33	49319	2	4.71	1	0.717773	0.0456698	20.9359	21.4798	20.5903	21.5987	21.4744	22.0864
A0A178UJQ1_ARATH	tr|A0A178UJQ1|A0A178UJQ1_ARATH Signal recognition particle receptor subunit beta OS=Arabidopsis thaliana OX=3702 GN=AXX17_At5g05170 PE=1 SV=1	AXX17_At5g05170	29076	8	39.62	6	0.713413	0.00426258	24.4803	24.504	24.3635	25.4445	25.0648	24.9788
RIBA1_ARATH	sp|P47924|RIBA1_ARATH Bifunctional riboflavin biosynthesis protein RIBA 1, chloroplastic OS=Arabidopsis thaliana OX=3702 GN=RIBA1 PE=1 SV=2	RIBA1	59056	3	5.34	2	0.712356	0.0083442	21.7007	21.6411	22.2194	22.5209	22.6075	22.5699
RS211_ARATH	sp|Q9M337|RS211_ARATH 40S ribosomal protein S21-1 OS=Arabidopsis thaliana OX=3702 GN=RPS21B PE=1 SV=1	RPS21B	9074	6	76.83	3	0.712344	0.0484567	23.7307	22.7163	23.035	23.9543	24.0292	23.6356
P4H2_ARATH	sp|F4JAU3|P4H2_ARATH Prolyl 4-hydroxylase 2 OS=Arabidopsis thaliana OX=3702 GN=P4H2 PE=1 SV=1	P4H2	33019	8	36.45	8	0.71152	0.0116569	23.7423	24.1034	24.4484	24.7689	24.8524	24.8073
OST1A_ARATH	sp|Q9SFX3|OST1A_ARATH Dolichyl-diphosphooligosaccharide--protein glycosyltransferase subunit 1A OS=Arabidopsis thaliana OX=3702 GN=OST1A PE=2 SV=1	OST1A	68642	26	58.47	22	0.710086	0.000513253	26.8482	26.7706	26.7302	27.477	27.5505	27.4516
TBL40_ARATH	sp|Q67XC4|TBL40_ARATH Protein trichome birefringence-like 40 OS=Arabidopsis thaliana OX=3702 GN=TBL40 PE=2 SV=2	TBL40	41768	3	9.62	3	0.709017	0.11572	21.7879	22.7345	23.2623	23.4198	23.4078	23.0842
A0A178WI74_ARATH	tr|A0A178WI74|A0A178WI74_ARATH (thale cress) hypothetical protein OS=Arabidopsis thaliana OX=3702 GN=At1g14710 PE=1 SV=1	At1g14710	66204	2	4.16	2	0.708995	0.341335	21.4509	21.4024	19.4885	22.0434	21.9159	20.5094
SMT1_ARATH	sp|Q9LM02|SMT1_ARATH Cycloartenol-C-24-methyltransferase OS=Arabidopsis thaliana OX=3702 GN=SMT1 PE=1 SV=1	SMT1	38268	4	22.32	3	0.704345	0.317391	22.4446	21.0408	22.6353	23.0829	23.5258	21.6251
TRNH1_ARATH	sp|P0DKI3|TRNH1_ARATH Tropinone reductase homolog At1g07440 OS=Arabidopsis thaliana OX=3702 GN=At1g07440 PE=1 SV=1	At1g07440	28332	5	33.83	5	0.703517	0.00351113	24.3204	24.7757	24.5996	25.2701	25.3258	25.2104
OST3B_ARATH	sp|Q9SYB5|OST3B_ARATH Probable dolichyl-diphosphooligosaccharide--protein glycosyltransferase subunit 3B OS=Arabidopsis thaliana OX=3702 GN=OST3B PE=2 SV=1	OST3B	38806	12	36.42	12	0.702769	0.00480537	26.0163	25.956	25.5909	26.6994	26.5207	26.4514
PP352_ARATH	sp|Q9M065|PP352_ARATH Pentatricopeptide repeat-containing protein At4g36680, mitochondrial OS=Arabidopsis thaliana OX=3702 GN=At4g36680 PE=1 SV=1	At4g36680	46547	4	13.11	4	0.700891	0.233867	22.6286	21.2343	22.4246	21.9357	23.0365	23.418
RRA3_ARATH	sp|Q9LN62|RRA3_ARATH Arabinosyltransferase RRA3 OS=Arabidopsis thaliana OX=3702 GN=RRA3 PE=2 SV=1	RRA3	48251	8	31.31	8	0.700745	0.0552752	24.2224	23.2187	23.861	24.4499	24.7446	24.2099
A0A178WF37_ARATH	tr|A0A178WF37|A0A178WF37_ARATH Prolyl endopeptidase OS=Arabidopsis thaliana OX=3702 GN=AXX17_At1g44580 PE=3 SV=1	AXX17_At1g44580	88205	15	31.96	11	0.700341	0.00349473	24.6666	24.6613	24.4664	25.1101	25.5167	25.2685
RLA03_ARATH	sp|P57691|RLA03_ARATH 60S acidic ribosomal protein P0-3 OS=Arabidopsis thaliana OX=3702 GN=RPP0C PE=1 SV=1	RPP0C	34390	21	74.92	2	0.697004	0.0951431	22.5703	23.806	23.4726	24.1133	23.6563	24.1704
A0A5S9X678_ARATH	tr|A0A5S9X678|A0A5S9X678_ARATH Nuclear pore protein OS=Arabidopsis thaliana OX=3702 GN=C24_LOCUS10500 PE=3 SV=1	C24_LOCUS10500	96587	9	15.68	7	0.696356	0.0214889	22.7167	23.3818	23.3486	23.9773	23.9263	23.6325
FBK10_ARATH	sp|P0DI02|FBK10_ARATH F-box/kelch-repeat protein At1g24800 OS=Arabidopsis thaliana OX=3702 GN=At1g24800 PE=2 SV=1	At1g24800	49644	5	14.55	5	0.695691	0.0691789	22.6234	22.7735	21.8489	23.5352	22.9109	22.8867
CESA7_ARATH	sp|Q9SWW6|CESA7_ARATH Cellulose synthase A catalytic subunit 7 [UDP-forming] OS=Arabidopsis thaliana OX=3702 GN=CESA7 PE=1 SV=1	CESA7	115798	15	19.79	11	0.694838	0.164936	24.1865	24.6227	23.5983	24.6734	24.201	25.6178
STY8_ARATH	sp|O22558|STY8_ARATH Serine/threonine-protein kinase STY8 OS=Arabidopsis thaliana OX=3702 GN=STY8 PE=1 SV=2	STY8	61509	3	6.78	3	0.693649	0.0215059	22.9761	22.7939	22.2051	23.4178	23.4079	23.2304
RAA1C_ARATH	sp|Q9FK68|RAA1C_ARATH Ras-related protein RABA1c OS=Arabidopsis thaliana OX=3702 GN=RABA1C PE=1 SV=1	RABA1C	23870	13	62.04	6	0.692219	0.00805204	24.94	24.5964	25.0571	25.3386	25.6668	25.6648
RGP5_ARATH	sp|Q9FFD2|RGP5_ARATH Probable UDP-arabinopyranose mutase 5 OS=Arabidopsis thaliana OX=3702 GN=RGP5 PE=1 SV=1	RGP5	38585	16	51.72	10	0.691873	0.00885144	25.5803	26.0643	25.4922	26.3551	26.4732	26.3841
A0A178W621_ARATH	tr|A0A178W621|A0A178W621_ARATH Uncharacterized protein OS=Arabidopsis thaliana OX=3702 GN=At1g29040 PE=4 SV=1	At1g29040	16871	3	26.45	3	0.691485	0.295013	21.593	23.5295	22.5151	23.777	23.5669	22.3681
A0A178WIR9_ARATH	tr|A0A178WIR9|A0A178WIR9_ARATH Serine/threonine-protein phosphatase 2A 55 kDa regulatory subunit B OS=Arabidopsis thaliana OX=3702 GN=AXX17_At1g18620 PE=3 SV=1	AXX17_At1g18620	56149	9	25.6	7	0.689815	0.019373	24.1246	24.3332	24.8565	25.2299	25.1786	24.9753
TMN1_ARATH	sp|Q940G0|TMN1_ARATH Transmembrane 9 superfamily member 1 OS=Arabidopsis thaliana OX=3702 GN=TMN1 PE=1 SV=1	TMN1	66893	10	17.66	8	0.688378	0.00501098	25.6183	26.0999	25.7674	26.5762	26.4285	26.5461
A0A7G2E588_ARATH	tr|A0A7G2E588|A0A7G2E588_ARATH Methionyl-tRNA formyltransferase OS=Arabidopsis thaliana OX=3702 GN=AT9943_LOCUS4780 PE=3 SV=1	AT9943_LOCUS4780	106403	10	13.12	5	0.687327	0.135626	22.7404	22.2189	22.5798	22.489	23.1226	23.9894
PMT2_ARATH	sp|B9DFI7|PMT2_ARATH Probable methyltransferase PMT2 OS=Arabidopsis thaliana OX=3702 GN=At1g26850 PE=2 SV=2	At1g26850	69623	22	47.08	20	0.686599	0.00140874	26.3772	26.3027	26.3304	26.8763	27.0206	27.1733
BGL42_ARATH	sp|Q9FIW4|BGL42_ARATH Beta-glucosidase 42 OS=Arabidopsis thaliana OX=3702 GN=BGLU42 PE=2 SV=1	BGLU42	56077	11	37.76	9	0.685173	0.00821268	24.0976	23.8247	24.3059	24.6458	24.6663	24.9715
Q9LQQ3_ARATH	tr|Q9LQQ3|Q9LQQ3_ARATH At1g07750/F24B9_13 OS=Arabidopsis thaliana OX=3702 GN=At1g07750 PE=1 SV=1	At1g07750	38311	16	58.43	15	0.684919	0.00179951	27.8906	28.0867	28.0832	28.8324	28.7106	28.5723
GUN2_ARATH	sp|Q9FXI9|GUN2_ARATH Endoglucanase 2 OS=Arabidopsis thaliana OX=3702 GN=At1g19940 PE=2 SV=1	At1g19940	56708	5	14.56	5	0.682374	0.193237	22.0222	23.7726	23.2693	23.9948	23.4513	23.6651
CALR1_ARATH	sp|O04151|CALR1_ARATH Calreticulin-1 OS=Arabidopsis thaliana OX=3702 GN=CRT1 PE=1 SV=1	CRT1	48527	21	49.41	12	0.681896	0.177185	25.3703	25.8578	25.0557	26.9158	26.106	25.3077
PLDG1_ARATH	sp|Q9T053|PLDG1_ARATH Phospholipase D gamma 1 OS=Arabidopsis thaliana OX=3702 GN=PLDGAMMA1 PE=1 SV=1	PLDGAMMA1	95588	20	31.47	19	0.681101	0.0154775	26.0939	25.8558	25.7426	26.5781	26.2585	26.8991
HSP7R_ARATH	sp|F4JMJ1|HSP7R_ARATH Heat shock 70 kDa protein 17 OS=Arabidopsis thaliana OX=3702 GN=HSP70-17 PE=2 SV=1	HSP70-17	96725	29	36.79	25	0.679181	0.00632329	26.9255	26.5958	26.5347	27.5649	27.2931	27.2356
DEF01_ARATH	sp|Q9ZUL7|DEF01_ARATH Defensin-like protein 1 OS=Arabidopsis thaliana OX=3702 GN=PDF2.3 PE=2 SV=1	PDF2.3	8544	1	31.17	1	0.678357	0.0308889	21.6459	22.0131	21.6767	22.9271	22.2256	22.218
ARF2A_ARATH	sp|Q9LQC8|ARF2A_ARATH ADP-ribosylation factor 2-A OS=Arabidopsis thaliana OX=3702 GN=ARF2-A PE=2 SV=2	ARF2-A	20593	28	89.5	3	0.677542	0.149649	22.7021	23.5637	23.9026	24.6682	23.9212	23.6117
STA1_ARATH	sp|Q9ZT71|STA1_ARATH Protein STABILIZED1 OS=Arabidopsis thaliana OX=3702 GN=STA1 PE=1 SV=1	STA1	115576	7	8.65	4	0.677499	0.336323	22.0955	24.6101	24.0251	24.0585	24.382	24.3227
FN3KR_ARATH	sp|Q9LEW8|FN3KR_ARATH Protein-ribulosamine 3-kinase, chloroplastic OS=Arabidopsis thaliana OX=3702 GN=At3g61080 PE=1 SV=2	At3g61080	36471	3	16.56	1	0.676863	0.0368978	22.1301	21.4061	21.475	22.5451	22.4553	22.0414
MSRA5_ARATH	sp|Q9SL43|MSRA5_ARATH Peptide methionine sulfoxide reductase A5 OS=Arabidopsis thaliana OX=3702 GN=MSRA5 PE=2 SV=1	MSRA5	28928	2	9.84	2	0.675464	0.0196497	20.6004	20.8541	20.6998	21.7491	21.4214	21.0101
ACCD_ARATH	sp|P56765|ACCD_ARATH Acetyl-coenzyme A carboxylase carboxyl transferase subunit beta, chloroplastic OS=Arabidopsis thaliana OX=3702 GN=accD PE=1 SV=2	accD	55636	26	68.24	22	0.673846	0.213773	26.1832	27.7318	27.3164	27.1038	27.9876	28.1615
A0A178VCU1_ARATH	tr|A0A178VCU1|A0A178VCU1_ARATH Uncharacterized protein OS=Arabidopsis thaliana OX=3702 GN=AXX17_At3g49060 PE=4 SV=1	AXX17_At3g49060	29056	1	5.51	1	0.673762	0.375284	16.1427	15.4126	16.0393	14.9695	17.6055	17.0409
A0A178VY96_ARATH	tr|A0A178VY96|A0A178VY96_ARATH Macro domain-containing protein OS=Arabidopsis thaliana OX=3702 GN=At2g40600 PE=1 SV=1	At2g40600	27478	5	21.4	4	0.673509	0.0847533	24.5621	23.5648	24.5039	25.1905	24.9035	24.5573
CYC2_ARATH	sp|Q9T0G2|CYC2_ARATH Cytochrome c-2 OS=Arabidopsis thaliana OX=3702 GN=CYTC-2 PE=1 SV=1	CYTC-2	12239	3	30.36	1	0.673214	0.00290565	20.7186	20.9041	20.8853	21.3132	21.56	21.6545
A0A178WHB2_ARATH	tr|A0A178WHB2|A0A178WHB2_ARATH Uncharacterized protein OS=Arabidopsis thaliana OX=3702 GN=AXX17_At1g48190 PE=4 SV=1	AXX17_At1g48190	30576	2	9.56	2	0.672581	0.205463	22.3636	20.9051	22.1496	22.9285	22.6375	21.87
DHAR2_ARATH	sp|Q9FRL8|DHAR2_ARATH Glutathione S-transferase DHAR2 OS=Arabidopsis thaliana OX=3702 GN=DHAR2 PE=1 SV=1	DHAR2	23407	12	71.83	11	0.671309	0.00437219	25.9905	26.3693	26.418	26.9613	26.8922	26.9382
E131_ARATH	sp|O65399|E131_ARATH Glucan endo-1,3-beta-glucosidase 1 OS=Arabidopsis thaliana OX=3702 GN=At1g11820 PE=2 SV=3	At1g11820	55630	2	8.61	2	0.670706	0.187077	21.5915	20.4748	19.8077	21.1565	21.3837	21.3458
MSBP2_ARATH	sp|Q9M2Z4|MSBP2_ARATH Membrane steroid-binding protein 2 OS=Arabidopsis thaliana OX=3702 GN=MSBP2 PE=1 SV=1	MSBP2	25382	8	44.64	5	0.670511	0.0034522	24.8642	24.6689	24.7292	25.6296	25.2494	25.3949
A0A178V0T7_ARATH	tr|A0A178V0T7|A0A178V0T7_ARATH Protein transport protein SEC23 OS=Arabidopsis thaliana OX=3702 GN=AXX17_At4g16260 PE=1 SV=1	AXX17_At4g16260	85278	21	40.41	19	0.667806	0.00691684	26.0516	26.1862	26.2008	26.9961	26.5127	26.9332
RGP1_ARATH	sp|Q9SRT9|RGP1_ARATH UDP-arabinopyranose mutase 1 OS=Arabidopsis thaliana OX=3702 GN=RGP1 PE=1 SV=1	RGP1	40629	37	93.84	13	0.667194	0.00566456	27.5742	27.9751	28.0415	28.5542	28.4788	28.5594
CB60B_ARATH	sp|Q9FKL6|CB60B_ARATH Calmodulin-binding protein 60 B OS=Arabidopsis thaliana OX=3702 GN=CBP60B PE=2 SV=1	CBP60B	72364	4	6.34	4	0.666104	0.0508495	21.6501	22.4049	22.3344	22.8598	22.4462	23.0818
M2K5_ARATH	sp|Q8RXG3|M2K5_ARATH Mitogen-activated protein kinase kinase 5 OS=Arabidopsis thaliana OX=3702 GN=MKK5 PE=1 SV=2	MKK5	38329	7	23.56	7	0.665105	0.00100218	24.4906	24.499	24.6591	25.2812	25.1846	25.1781
EMC89_ARATH	sp|Q9FG71|EMC89_ARATH ER membrane protein complex subunit 8/9 homolog OS=Arabidopsis thaliana OX=3702 GN=EMB2731 PE=2 SV=1	EMB2731	22979	4	32.21	4	0.662155	0.0249174	24.231	23.953	24.7315	24.834	25.0685	24.9995
A0A1P8B5D2_ARATH	tr|A0A1P8B5D2|A0A1P8B5D2_ARATH Phospholipase-like protein (PEARLI 4) family protein OS=Arabidopsis thaliana OX=3702 GN=At4g38550 PE=1 SV=1	At4g38550	58313	11	20.35	9	0.661508	0.0462952	24.6814	24.4031	23.7502	25.0803	24.7556	24.9834
COPA1_ARATH	sp|Q94A40|COPA1_ARATH Coatomer subunit alpha-1 OS=Arabidopsis thaliana OX=3702 GN=At1g62020 PE=2 SV=2	At1g62020	136566	68	59.13	24	0.660853	0.00483638	26.7305	26.6235	26.566	27.2579	27.1014	27.5433
NDA2_ARATH	sp|O80874|NDA2_ARATH Internal alternative NAD(P)H-ubiquinone oxidoreductase A2, mitochondrial OS=Arabidopsis thaliana OX=3702 GN=NDA2 PE=1 SV=1	NDA2	56503	4	9.06	4	0.659615	0.28379	20.8506	21.2265	22.9061	22.0266	22.2624	22.6731
PYR1_ARATH	sp|O49686|PYR1_ARATH Abscisic acid receptor PYR1 OS=Arabidopsis thaliana OX=3702 GN=PYR1 PE=1 SV=1	PYR1	21575	8	53.93	8	0.659103	0.135403	24.2668	24.8042	25.7364	25.5253	25.7936	25.4659
A0A178UU19_ARATH	tr|A0A178UU19|A0A178UU19_ARATH AB hydrolase-1 domain-containing protein OS=Arabidopsis thaliana OX=3702 GN=AXX17_At4g14470 PE=4 SV=1	AXX17_At4g14470	46739	4	16.51	3	0.658643	0.219737	22.2844	23.3229	22.9593	22.5721	24.0574	23.913
A0A178VCJ1_ARATH	tr|A0A178VCJ1|A0A178VCJ1_ARATH PDX1.2 OS=Arabidopsis thaliana OX=3702 GN=AXX17_At3g16850 PE=3 SV=1	AXX17_At3g16850	33836	2	7.96	2	0.658504	0.130294	21.367	21.3077	21.7119	22.9387	21.8259	21.5974
A0A1P8B4G8_ARATH	tr|A0A1P8B4G8|A0A1P8B4G8_ARATH Survival protein SurE-like phosphatase/nucleotidase OS=Arabidopsis thaliana OX=3702 GN=At4g14930 PE=1 SV=1	At4g14930	33707	6	32.9	6	0.658421	0.024208	24.4092	25.1494	24.8559	25.3818	25.6482	25.3597
AKH1_ARATH	sp|Q9SA18|AKH1_ARATH Bifunctional aspartokinase/homoserine dehydrogenase 1, chloroplastic OS=Arabidopsis thaliana OX=3702 GN=AKHSDH1 PE=1 SV=1	AKHSDH1	99404	37	57.41	36	0.657427	0.00269599	27.0623	27.3953	27.3746	27.9092	27.9347	27.9605
RL141_ARATH	sp|Q9SIM4|RL141_ARATH 60S ribosomal protein L14-1 OS=Arabidopsis thaliana OX=3702 GN=RPL14A PE=2 SV=1	RPL14A	15506	11	54.48	3	0.657387	0.0111343	23.5019	23.6521	23.277	24.3885	23.8839	24.1308
A0A7G2F1J5_ARATH	tr|A0A7G2F1J5|A0A7G2F1J5_ARATH (thale cress) hypothetical protein OS=Arabidopsis thaliana OX=3702 GN=AT9943_LOCUS16979 PE=3 SV=1	AT9943_LOCUS16979	56489	5	13.75	5	0.656918	0.0794662	22.5141	22.3253	22.8246	22.7003	23.1307	23.8037
SUN2_ARATH	sp|Q9SG79|SUN2_ARATH SUN domain-containing protein 2 OS=Arabidopsis thaliana OX=3702 GN=SUN2 PE=1 SV=1	SUN2	49940	1	3.74	1	0.656913	0.0299003	20.8519	21.1733	21.0022	21.3024	22.0988	21.5969
A0A178US90_ARATH	tr|A0A178US90|A0A178US90_ARATH RNA helicase OS=Arabidopsis thaliana OX=3702 GN=At4g33360 PE=3 SV=1	At4g33360	99244	11	21.23	10	0.655347	0.0105414	24.2119	24.2404	24.6362	25.0422	25.2019	24.8105
STT3A_ARATH	sp|Q93ZY3|STT3A_ARATH Dolichyl-diphosphooligosaccharide--protein glycosyltransferase subunit STT3A OS=Arabidopsis thaliana OX=3702 GN=STT3A PE=2 SV=1	STT3A	86113	17	30.3	11	0.655025	0.00426799	25.4471	25.8425	25.6262	26.3992	26.186	26.2957
NLTP3_ARATH	sp|Q9LLR7|NLTP3_ARATH Non-specific lipid-transfer protein 3 OS=Arabidopsis thaliana OX=3702 GN=LTP3 PE=3 SV=1	LTP3	11694	5	47.83	5	0.653999	0.000839878	28.4746	28.4626	28.4677	29.0806	29.221	29.0654
RETOL_ARATH	sp|Q9SVG4|RETOL_ARATH Berberine bridge enzyme-like 19 OS=Arabidopsis thaliana OX=3702 GN=At4g20830 PE=1 SV=2	At4g20830	63559	27	44.56	26	0.651863	0.00621395	27.5931	27.1608	27.1805	27.953	27.8929	28.0441
LEUC_ARATH	sp|Q94AR8|LEUC_ARATH 3-isopropylmalate dehydratase large subunit, chloroplastic OS=Arabidopsis thaliana OX=3702 GN=IIL1 PE=1 SV=1	IIL1	55014	36	70.53	32	0.650667	0.00771623	28.7002	29.0642	29.2156	29.7277	29.61	29.5943
SBT16_ARATH	sp|O49607|SBT16_ARATH Subtilisin-like protease SBT1.6 OS=Arabidopsis thaliana OX=3702 GN=SBT1.6 PE=2 SV=1	SBT1.6	81046	16	26.05	15	0.649937	0.0136676	26.6492	26.2274	26.6	27.324	26.8723	27.2302
A0A178VUH4_ARATH	tr|A0A178VUH4|A0A178VUH4_ARATH Uncharacterized protein OS=Arabidopsis thaliana OX=3702 GN=AXX17_At2g26840 PE=4 SV=1	AXX17_At2g26840	51500	5	15.82	5	0.649753	0.0407367	22.6821	23.3557	23.2058	23.7619	24.0308	23.4001
GBB_ARATH	sp|P49177|GBB_ARATH Guanine nucleotide-binding protein subunit beta OS=Arabidopsis thaliana OX=3702 GN=GB1 PE=1 SV=1	GB1	41006	6	18.57	6	0.648138	0.244093	23.7476	23.2464	23.4086	25.0853	24.1479	23.1138
SAC4_ARATH	sp|Q7XZU1|SAC4_ARATH Phosphoinositide phosphatase SAC4 OS=Arabidopsis thaliana OX=3702 GN=SAC4 PE=2 SV=1	SAC4	94047	2	2.65	2	0.646966	0.00146522	20.6234	20.6201	20.398	21.1848	21.173	21.2246
A0A178USV7_ARATH	tr|A0A178USV7|A0A178USV7_ARATH Uncharacterized protein OS=Arabidopsis thaliana OX=3702 GN=At4g32605 PE=4 SV=1	At4g32605	25171	2	12.33	2	0.645434	0.184585	20.8319	20.9216	21.0078	21.5119	22.4546	20.7311
APF2_ARATH	sp|Q9LNJ3|APF2_ARATH Aspartyl protease family protein 2 OS=Arabidopsis thaliana OX=3702 GN=APF2 PE=2 SV=1	APF2	52175	13	33.81	10	0.644044	0.00475371	25.3689	25.4227	25.359	26.2316	26.0646	25.7866
HIBC1_ARATH	sp|Q9LKJ1|HIBC1_ARATH 3-hydroxyisobutyryl-CoA hydrolase 1 OS=Arabidopsis thaliana OX=3702 GN=CHY1 PE=1 SV=1	CHY1	42073	6	25.66	5	0.64339	0.493254	22.2051	22.4667	21.4419	23.1943	20.7461	24.1034
UBCP_ARATH	sp|Q8W3M6|UBCP_ARATH Ubiquitin-like domain-containing CTD phosphatase OS=Arabidopsis thaliana OX=3702 GN=At4g06599 PE=2 SV=1	At4g06599	38956	5	19.71	3	0.643238	0.485818	20.16	22.9264	22.885	21.702	22.9749	23.2242
MNS3_ARATH	sp|Q93Y37|MNS3_ARATH Mannosyl-oligosaccharide 1,2-alpha-mannosidase MNS3 OS=Arabidopsis thaliana OX=3702 GN=MNS3 PE=1 SV=1	MNS3	69069	8	18.11	6	0.643045	0.336594	23.1106	21.0166	22.9831	22.5157	23.4073	23.1164
A0A178UM22_ARATH	tr|A0A178UM22|A0A178UM22_ARATH Uncharacterized protein OS=Arabidopsis thaliana OX=3702 GN=At5g40490 PE=4 SV=1	At5g40490	42505	4	18.87	4	0.642714	0.0320435	22.8245	22.4797	23.0415	23.4687	23.7266	23.0786
NDB2_ARATH	sp|Q94BV7|NDB2_ARATH External alternative NAD(P)H-ubiquinone oxidoreductase B2, mitochondrial OS=Arabidopsis thaliana OX=3702 GN=NDB2 PE=1 SV=1	NDB2	65059	14	36.25	12	0.64245	0.0271898	24.8374	25.4201	25.2693	25.5103	26.041	25.9028
GSL_ARATH	sp|Q9SKK4|GSL_ARATH Probable 2-oxoacid dependent dioxygenase OS=Arabidopsis thaliana OX=3702 GN=GSL-OH PE=1 SV=1	GSL-OH	40351	24	66.3	22	0.642062	0.0015237	27.4379	27.4686	27.4646	28.1913	28.1569	27.9491
TSN2_ARATH	sp|Q9FLT0|TSN2_ARATH Ribonuclease TUDOR 2 OS=Arabidopsis thaliana OX=3702 GN=TSN2 PE=1 SV=1	TSN2	107742	58	60.2	55	0.641402	0.00226346	28.6048	28.4901	28.7945	29.3284	29.2122	29.2729
A0A7G2EYZ2_ARATH	tr|A0A7G2EYZ2|A0A7G2EYZ2_ARATH (thale cress) hypothetical protein OS=Arabidopsis thaliana OX=3702 GN=AT9943_LOCUS15285 PE=3 SV=1	AT9943_LOCUS15285	111947	38	37.72	35	0.640577	0.00463436	27.4318	27.8308	27.7358	28.2928	28.2351	28.3923
GPLPB_ARATH	sp|Q9C4Z6|GPLPB_ARATH Receptor for activated C kinase 1B OS=Arabidopsis thaliana OX=3702 GN=RACK1B PE=1 SV=1	RACK1B	35801	21	66.87	3	0.63853	0.196893	23.4852	23.9869	24.7509	25.2184	24.8956	24.0246
PAP8_ARATH	sp|Q941D3|PAP8_ARATH Probable plastid-lipid-associated protein 8, chloroplastic OS=Arabidopsis thaliana OX=3702 GN=PAP8 PE=1 SV=1	PAP8	26482	7	40.59	7	0.637052	0.0458281	24.2349	24.8486	23.9912	24.9302	24.8411	25.2146
CRR38_ARATH	sp|Q9LRJ9|CRR38_ARATH Cysteine-rich repeat secretory protein 38 OS=Arabidopsis thaliana OX=3702 GN=CRRSP38 PE=2 SV=1	CRRSP38	27864	5	21.43	4	0.636683	0.386171	23.1558	21.5866	22.8542	21.8878	23.9714	23.6475
UBA5_ARATH	sp|O23034|UBA5_ARATH Ubiquitin-like modifier-activating enzyme 5 OS=Arabidopsis thaliana OX=3702 GN=At1g05350 PE=3 SV=2	At1g05350	47020	13	34.8	11	0.636379	0.017163	24.8079	25.3675	25.0203	25.8798	25.7433	25.4817
PPR87_ARATH	sp|Q8LE47|PPR87_ARATH Pentatricopeptide repeat-containing protein At1g61870, mitochondrial OS=Arabidopsis thaliana OX=3702 GN=PPR336 PE=2 SV=2	PPR336	45758	5	15.69	3	0.636243	0.279287	22.6816	23.3977	24.6499	23.7073	24.5064	24.4242
TMKL1_ARATH	sp|P33543|TMKL1_ARATH Putative kinase-like protein TMKL1 OS=Arabidopsis thaliana OX=3702 GN=TMKL1 PE=1 SV=1	TMKL1	73353	1	3.26	1	0.635891	0.221955	20.0319	21.4538	19.7963	20.7246	21.1925	21.2725
IF4E5_ARATH	sp|Q9FK59|IF4E5_ARATH Eukaryotic translation initiation factor NCBP OS=Arabidopsis thaliana OX=3702 GN=NCBP PE=1 SV=1	NCBP	25745	4	20.36	4	0.635302	0.0218766	22.8332	23.3085	22.748	23.3617	23.6293	23.8047
PMTQ_ARATH	sp|Q8L7V3|PMTQ_ARATH Probable methyltransferase PMT26 OS=Arabidopsis thaliana OX=3702 GN=At5g64030 PE=2 SV=1	At5g64030	93049	15	25.21	10	0.634458	0.0188836	25.6622	25.0065	25.5634	26.0887	25.9895	26.0573
RK192_ARATH	sp|Q8RXX5|RK192_ARATH 50S ribosomal protein L19-2, chloroplastic OS=Arabidopsis thaliana OX=3702 GN=At5g47190 PE=2 SV=1	At5g47190	25469	9	23.58	9	0.634052	0.163047	25.5237	25.6592	24.2243	25.7417	25.8912	25.6765
A0A178V3S0_ARATH	tr|A0A178V3S0|A0A178V3S0_ARATH Uncharacterized protein OS=Arabidopsis thaliana OX=3702 GN=AXX17_At4g37440 PE=3 SV=1	AXX17_At4g37440	117624	13	19.51	6	0.633899	0.0325148	23.9068	23.386	23.3844	24.5385	23.9741	24.0662
GSOX1_ARATH	sp|Q9SS04|GSOX1_ARATH Flavin-containing monooxygenase FMO GS-OX1 OS=Arabidopsis thaliana OX=3702 GN=FMOGS-OX1 PE=1 SV=1	FMOGS-OX1	52309	14	54.03	11	0.633496	0.0615413	24.7127	25.6004	24.8977	25.8612	25.4103	25.8398
A0A178UAK9_ARATH	tr|A0A178UAK9|A0A178UAK9_ARATH PHB domain-containing protein OS=Arabidopsis thaliana OX=3702 GN=AXX17_At5g53140 PE=3 SV=1	AXX17_At5g53140	43639	9	28.93	4	0.632553	0.268337	21.4348	21.2854	21.4081	22.0777	20.9246	23.0236
AGD9_ARATH	sp|Q9FIQ0|AGD9_ARATH Probable ADP-ribosylation factor GTPase-activating protein AGD9 OS=Arabidopsis thaliana OX=3702 GN=AGD9 PE=1 SV=1	AGD9	43550	15	57.21	15	0.630056	0.0011299	25.6913	25.6706	25.5151	26.265	26.2539	26.2482
RRAA1_ARATH	sp|Q9M8R9|RRAA1_ARATH Putative 4-hydroxy-4-methyl-2-oxoglutarate aldolase 1 OS=Arabidopsis thaliana OX=3702 GN=At3g02770 PE=2 SV=1	At3g02770	17836	7	39.16	3	0.629962	0.0449365	24.0339	24.4648	24.8093	24.7537	25.2121	25.2321
SYEM_ARATH	sp|Q9FEA2|SYEM_ARATH Glutamate--tRNA ligase, chloroplastic/mitochondrial OS=Arabidopsis thaliana OX=3702 GN=OVA3 PE=1 SV=1	OVA3	63466	11	31.58	9	0.629607	0.0332473	24.488	25.0387	24.2058	25.2531	25.1513	25.2169
ADRC3_ARATH	sp|Q9SQR4|ADRC3_ARATH NADPH-dependent aldehyde reductase-like protein, chloroplastic OS=Arabidopsis thaliana OX=3702 GN=At3g03980 PE=3 SV=1	At3g03980	28146	5	26.67	5	0.627851	0.128548	22.7661	21.5079	22.6959	22.9801	22.9732	22.9001
SKP1A_ARATH	sp|Q39255|SKP1A_ARATH SKP1-like protein 1A OS=Arabidopsis thaliana OX=3702 GN=SKP1A PE=1 SV=1	SKP1A	17857	6	48.12	6	0.627675	0.0389286	23.7143	24.142	24.5393	24.6075	24.7186	24.9525
CLPF_ARATH	sp|Q67Y99|CLPF_ARATH Clp protease adapter protein ClpF, chloroplastic OS=Arabidopsis thaliana OX=3702 GN=CLPF PE=1 SV=1	CLPF	37440	2	9.39	2	0.627626	0.0147661	26.4195	26.485	26.2268	26.8689	27.3437	26.8016
SDF2_ARATH	sp|Q93ZE8|SDF2_ARATH Stromal cell-derived factor 2-like protein OS=Arabidopsis thaliana OX=3702 GN=SDF2 PE=1 SV=1	SDF2	23935	3	22.48	3	0.626086	0.0119083	23.9154	23.9571	23.6073	24.7189	24.29	24.3492
SRK2B_ARATH	sp|Q9C958|SRK2B_ARATH Serine/threonine-protein kinase SRK2B OS=Arabidopsis thaliana OX=3702 GN=SRK2B PE=1 SV=1	SRK2B	41040	12	33.52	2	0.625338	0.0930416	21.8884	22.0577	22.7156	23.249	22.3879	22.9008
A0A178WBR2_ARATH	tr|A0A178WBR2|A0A178WBR2_ARATH NERD domain-containing protein OS=Arabidopsis thaliana OX=3702 GN=At1g65020 PE=4 SV=1	At1g65020	35624	6	25.08	5	0.623881	0.0335388	23.4972	23.0872	23.1131	23.7443	24.2546	23.5703
MRS2B_ARATH	sp|Q058N4|MRS2B_ARATH Magnesium transporter MRS2-11, chloroplastic OS=Arabidopsis thaliana OX=3702 GN=MRS2-11 PE=1 SV=1	MRS2-11	51093	6	11.76	6	0.621525	0.179505	21.6488	23.1965	22.6527	22.9676	23.4004	22.9946
PFD3_ARATH	sp|P57741|PFD3_ARATH Probable prefoldin subunit 3 OS=Arabidopsis thaliana OX=3702 GN=At5g49510 PE=1 SV=1	At5g49510	21465	5	39.49	4	0.621362	0.089308	23.6942	22.5959	23.2859	23.8529	24.0214	23.5658
A0A178VSK1_ARATH	tr|A0A178VSK1|A0A178VSK1_ARATH DLH domain-containing protein OS=Arabidopsis thaliana OX=3702 GN=At2g32520 PE=4 SV=1	At2g32520	25921	12	50.21	10	0.620506	0.00206293	26.465	26.6768	26.7054	27.2927	27.1779	27.2381
Y5390_ARATH	sp|Q8GW20|Y5390_ARATH Uncharacterized protein At5g03900, chloroplastic OS=Arabidopsis thaliana OX=3702 GN=At5g03900 PE=2 SV=2	At5g03900	59501	5	15.11	4	0.620324	0.384652	21.6374	23.1104	21.362	23.728	21.817	22.4258
AP4E_ARATH	sp|Q8L7A9|AP4E_ARATH AP-4 complex subunit epsilon OS=Arabidopsis thaliana OX=3702 GN=At1g31730 PE=1 SV=1	At1g31730	103735	22	31.88	21	0.620307	0.00181969	26.0165	25.857	25.9736	26.6261	26.6325	26.4495
FRI1_ARATH	sp|Q39101|FRI1_ARATH Ferritin-1, chloroplastic OS=Arabidopsis thaliana OX=3702 GN=FER1 PE=1 SV=1	FER1	28178	13	62.75	12	0.619107	0.0105551	26.3709	26.6373	26.5068	27.4138	26.9738	26.9847
A0A178UH08_ARATH	tr|A0A178UH08|A0A178UH08_ARATH Uncharacterized protein OS=Arabidopsis thaliana OX=3702 GN=AXX17_At5g55130 PE=3 SV=1	AXX17_At5g55130	71638	3	5.71	3	0.617623	0.19894	22.8708	23.0663	21.5658	23.1737	23.3646	22.8175
A0A178UQY2_ARATH	tr|A0A178UQY2|A0A178UQY2_ARATH Uncharacterized protein OS=Arabidopsis thaliana OX=3702 GN=AXX17_At5g04320 PE=4 SV=1	AXX17_At5g04320	73774	17	29.69	14	0.615145	0.00130157	26.1432	26.0941	26.1126	26.8149	26.7531	26.6274
SNP33_ARATH	sp|Q9S7P9|SNP33_ARATH SNAP25 homologous protein SNAP33 OS=Arabidopsis thaliana OX=3702 GN=SNAP33 PE=1 SV=1	SNAP33	33644	6	32.67	5	0.614069	0.0290298	22.344	23.0837	22.6154	23.3922	23.3426	23.1506
RLA22_ARATH	sp|Q9SLF7|RLA22_ARATH 60S acidic ribosomal protein P2-2 OS=Arabidopsis thaliana OX=3702 GN=RPP2B PE=1 SV=1	RPP2B	11444	11	82.61	3	0.612377	0.340627	22.0252	23.5476	23.4296	22.6833	23.7704	24.3859
PDI11_ARATH	sp|Q9XI01|PDI11_ARATH Protein disulfide isomerase-like 1-1 OS=Arabidopsis thaliana OX=3702 GN=PDIL1-1 PE=1 SV=1	PDIL1-1	55602	35	71.26	35	0.611342	0.00368774	28.679	28.3756	28.3682	29.1422	29.0333	29.0813
GL17_ARATH	sp|Q9SFF9|GL17_ARATH Germin-like protein subfamily 1 member 7 OS=Arabidopsis thaliana OX=3702 GN=At3g05950 PE=2 SV=1	At3g05950	24736	3	19.21	3	0.610332	0.443095	23.6665	23.3349	21.7412	22.3509	23.6228	24.5999
THIK2_ARATH	sp|Q56WD9|THIK2_ARATH 3-ketoacyl-CoA thiolase 2, peroxisomal OS=Arabidopsis thaliana OX=3702 GN=PED1 PE=1 SV=2	PED1	48579	35	67.75	27	0.609343	0.00382698	28.7338	28.7196	28.5715	29.1984	29.1807	29.4739
RL241_ARATH	sp|Q42347|RL241_ARATH 60S ribosomal protein L24-1 OS=Arabidopsis thaliana OX=3702 GN=RPL24A PE=1 SV=2	RPL24A	18850	8	34.76	2	0.608729	0.0972775	22.7219	23.4249	23.3569	23.4073	24.3037	23.619
A0A1I9LN21_ARATH	tr|A0A1I9LN21|A0A1I9LN21_ARATH Phosphoglycerate mutase family protein OS=Arabidopsis thaliana OX=3702 GN=At3g60450 PE=1 SV=1	At3g60450	34720	7	43.79	4	0.607923	0.0840877	23.1789	24.3175	23.7069	24.2826	24.3463	24.3981
PDI23_ARATH	sp|O48773|PDI23_ARATH Protein disulfide-isomerase 2-3 OS=Arabidopsis thaliana OX=3702 GN=PDIL2-3 PE=2 SV=1	PDIL2-3	47755	20	56.14	17	0.607911	0.00306723	26.753	26.863	26.7749	27.5423	27.4395	27.2327
TRPC_ARATH	sp|P49572|TRPC_ARATH Indole-3-glycerol phosphate synthase, chloroplastic OS=Arabidopsis thaliana OX=3702 GN=IGPS PE=1 SV=2	IGPS	44577	23	63.93	21	0.607567	0.00181006	26.9241	26.7476	26.9359	27.4469	27.5501	27.4333
ASNS2_ARATH	sp|Q9LV77|ASNS2_ARATH Asparagine synthetase [glutamine-hydrolyzing] 2 OS=Arabidopsis thaliana OX=3702 GN=ASN2 PE=2 SV=1	ASN2	65030	17	47.75	15	0.607038	0.00656224	25.6404	25.8752	26.1023	26.5024	26.4772	26.4595
ACA4_ARATH	sp|O22218|ACA4_ARATH Calcium-transporting ATPase 4, plasma membrane-type OS=Arabidopsis thaliana OX=3702 GN=ACA4 PE=1 SV=1	ACA4	112749	6	7.77	3	0.606734	0.226886	22.3235	23.1896	21.7584	23.0509	23.5766	22.4643
Y1146_ARATH	sp|O64774|Y1146_ARATH G-type lectin S-receptor-like serine/threonine-protein kinase At1g61460 OS=Arabidopsis thaliana OX=3702 GN=At1g61460 PE=2 SV=4	At1g61460	84086	1	1.47	1	0.606643	0.0167644	20.6019	20.859	20.6984	21.6638	21.2054	21.11
A0A178WME6_ARATH	tr|A0A178WME6|A0A178WME6_ARATH Uncharacterized protein OS=Arabidopsis thaliana OX=3702 GN=At1g52780 PE=1 SV=1	At1g52780	119959	14	20.49	11	0.606517	0.0389087	24.7378	25.1987	25.4311	25.8405	25.9003	25.4464
A0A178UUN9_ARATH	tr|A0A178UUN9|A0A178UUN9_ARATH Uncharacterized protein OS=Arabidopsis thaliana OX=3702 GN=At4g29870 PE=3 SV=1	At4g29870	18777	2	20.93	2	0.605734	0.0241408	22.2676	22.1003	22.6003	23.0848	22.6264	23.0741
SCP46_ARATH	sp|Q8VY01|SCP46_ARATH Serine carboxypeptidase-like 46 OS=Arabidopsis thaliana OX=3702 GN=SCPL46 PE=2 SV=1	SCPL46	51883	3	9.68	1	0.605249	0.454191	25.067	22.198	24.5947	24.744	24.3138	24.6177
A0A7G2EJL0_ARATH	tr|A0A7G2EJL0|A0A7G2EJL0_ARATH (thale cress) hypothetical protein OS=Arabidopsis thaliana OX=3702 GN=AT9943_LOCUS9297 PE=4 SV=1	AT9943_LOCUS9297	57458	14	33.4	13	0.605157	0.00143353	26.7051	26.8781	26.821	27.357	27.4517	27.411
A0A384LGT1_ARATH	tr|A0A384LGT1|A0A384LGT1_ARATH (thale cress) hypothetical protein OS=Arabidopsis thaliana OX=3702 GN=AXX17_At3g24620 PE=1 SV=1	AXX17_At3g24620	27107	12	56.45	9	0.605013	0.0137191	25.6901	25.9817	25.6685	26.5393	26.513	26.103
CDKF1_ARATH	sp|O80345|CDKF1_ARATH Cyclin-dependent kinase F-1 OS=Arabidopsis thaliana OX=3702 GN=CDKF-1 PE=1 SV=1	CDKF-1	53752	4	14.41	2	0.604866	0.149951	20.9203	20.9313	22.0325	21.5446	22.2528	21.9011
NCPR1_ARATH	sp|Q9SB48|NCPR1_ARATH NADPH--cytochrome P450 reductase 1 OS=Arabidopsis thaliana OX=3702 GN=ATR1 PE=1 SV=1	ATR1	76766	13	29.48	12	0.604257	0.0189806	24.8638	25.4282	24.9083	25.5468	25.6833	25.7828
A0A1P8B8V0_ARATH	tr|A0A1P8B8V0|A0A1P8B8V0_ARATH Ubiquitin C-terminal hydrolases superfamily protein OS=Arabidopsis thaliana OX=3702 GN=At4g22285 PE=1 SV=1	At4g22285	59244	4	13.19	4	0.602767	0.251645	22.6269	21.9126	22.2667	21.8615	23.561	23.192
SYAP_ARATH	sp|Q9FFC7|SYAP_ARATH Alanine--tRNA ligase, chloroplastic/mitochondrial OS=Arabidopsis thaliana OX=3702 GN=EMB86 PE=1 SV=2	EMB86	107830	18	24.44	17	0.601702	0.0157528	24.717	25.3187	25.1063	25.7073	25.5722	25.6676
COG7_ARATH	sp|Q9FGN0|COG7_ARATH Conserved oligomeric Golgi complex subunit 7 OS=Arabidopsis thaliana OX=3702 GN=COG7 PE=1 SV=1	COG7	92259	13	22.49	10	0.600029	0.121158	24.5704	23.9294	23.8431	24.7901	24.1573	25.1956
UBP13_ARATH	sp|Q84WU2|UBP13_ARATH Ubiquitin C-terminal hydrolase 13 OS=Arabidopsis thaliana OX=3702 GN=UBP13 PE=1 SV=1	UBP13	130649	54	63.14	18	0.599669	0.0271294	25.9367	25.8046	25.3022	26.1946	26.4755	26.1724
PX11E_ARATH	sp|Q84JW1|PX11E_ARATH Peroxisomal membrane protein 11E OS=Arabidopsis thaliana OX=3702 GN=PEX11E PE=1 SV=1	PEX11E	25512	4	19.91	2	0.599637	0.157613	23.1134	21.7003	22.7939	23.1392	23.1132	23.1541
AB1F_ARATH	sp|Q9FJH6|AB1F_ARATH ABC transporter F family member 1 OS=Arabidopsis thaliana OX=3702 GN=ABCF1 PE=2 SV=1	ABCF1	66886	21	44.54	16	0.599081	0.00179543	25.6453	25.847	25.7776	26.35	26.4136	26.3035
A0A5S9WM33_ARATH	tr|A0A5S9WM33|A0A5S9WM33_ARATH Methyltransf_11 domain-containing protein OS=Arabidopsis thaliana OX=3702 GN=At1g55450 PE=4 SV=1	At1g55450	34475	11	42.12	10	0.599033	0.0047151	25.096	25.2015	25.0041	25.8978	25.6074	25.5934
UXS6_ARATH	sp|Q9ZV36|UXS6_ARATH UDP-glucuronic acid decarboxylase 6 OS=Arabidopsis thaliana OX=3702 GN=UXS6 PE=2 SV=1	UXS6	38621	36	80.47	8	0.598949	0.00720144	25.9693	26.1255	26.0678	26.4094	26.7089	26.8412
CSK2P_ARATH	sp|O64816|CSK2P_ARATH Casein kinase II subunit alpha-4, chloroplastic OS=Arabidopsis thaliana OX=3702 GN=CKA4 PE=2 SV=1	CKA4	50236	11	31.02	11	0.598285	0.107102	25.2001	26.1118	26.3693	26.5967	26.4299	26.4495
Y5129_ARATH	sp|C0LGT1|Y5129_ARATH Probable LRR receptor-like serine/threonine-protein kinase At5g10290 OS=Arabidopsis thaliana OX=3702 GN=At5g10290 PE=1 SV=1	At5g10290	68659	3	7.5	3	0.597529	0.45273	22.5676	22.2938	22.251	24.6672	22.4966	21.7412
SRP09_ARATH	sp|Q9SMU7|SRP09_ARATH Signal recognition particle 9 kDa protein OS=Arabidopsis thaliana OX=3702 GN=SRP9 PE=3 SV=1	SRP9	12023	2	22.33	2	0.597405	0.00198794	23.076	23.125	23.2129	23.8455	23.6411	23.7194
ACA11_ARATH	sp|Q9M2L4|ACA11_ARATH Putative calcium-transporting ATPase 11, plasma membrane-type OS=Arabidopsis thaliana OX=3702 GN=ACA11 PE=1 SV=1	ACA11	111945	7	9.66	5	0.597221	0.474674	25.0252	22.8564	22.2815	23.443	24.7834	23.7284
A0A384KNS6_ARATH	tr|A0A384KNS6|A0A384KNS6_ARATH (thale cress) hypothetical protein OS=Arabidopsis thaliana OX=3702 GN=At3g07170 PE=4 SV=1	At3g07170	22682	3	15.27	3	0.595989	0.100804	22.6268	21.9857	21.5378	22.632	22.9057	22.4006
COV1_ARATH	sp|F4IUE7|COV1_ARATH Protein CONTINUOUS VASCULAR RING 1 OS=Arabidopsis thaliana OX=3702 GN=COV1 PE=1 SV=2	COV1	29674	1	5.97	1	0.595963	0.111333	21.3063	21.7291	21.2181	21.3641	22.2747	22.4025
CAN1_ARATH	sp|F4IZC5|CAN1_ARATH Staphylococcal-like nuclease CAN1 OS=Arabidopsis thaliana OX=3702 GN=CAN1 PE=1 SV=1	CAN1	36134	2	8.05	2	0.595272	0.449005	20.3831	20.79	23.0026	21.4511	21.9798	22.5306
BBE16_ARATH	sp|O64745|BBE16_ARATH Berberine bridge enzyme-like 16 OS=Arabidopsis thaliana OX=3702 GN=At2g34810 PE=2 SV=1	At2g34810	61307	6	14.26	6	0.594705	0.42427	25.1281	23.8679	23.4054	24.3777	25.9704	23.8373
COPB1_ARATH	sp|Q9SV21|COPB1_ARATH Coatomer subunit beta-1 OS=Arabidopsis thaliana OX=3702 GN=At4g31480 PE=3 SV=2	At4g31480	106145	71	64.77	64	0.594682	0.00186627	29.077	29.0749	28.8847	29.5823	29.5884	29.65
GMD2_ARATH	sp|P93031|GMD2_ARATH GDP-mannose 4,6 dehydratase 2 OS=Arabidopsis thaliana OX=3702 GN=MUR1 PE=1 SV=3	MUR1	41961	16	45.31	14	0.594282	0.00287586	26.6265	26.5292	26.5322	27.3164	27.0387	27.1156
AP4S_ARATH	sp|O82201|AP4S_ARATH AP-4 complex subunit sigma OS=Arabidopsis thaliana OX=3702 GN=At2g19790 PE=1 SV=1	At2g19790	16921	2	13.99	2	0.594052	0.0448538	22.2451	21.4637	21.6599	22.3928	22.2073	22.5508
CP74A_ARATH	sp|Q96242|CP74A_ARATH Allene oxide synthase, chloroplastic OS=Arabidopsis thaliana OX=3702 GN=CYP74A PE=1 SV=3	CYP74A	58197	40	75.1	40	0.593962	0.00481308	27.7206	28.053	28.0491	28.5687	28.5554	28.4804
A0A384KDE3_ARATH	tr|A0A384KDE3|A0A384KDE3_ARATH Fe2OG dioxygenase domain-containing protein OS=Arabidopsis thaliana OX=3702 GN=At3g19010 PE=3 SV=1	At3g19010	40696	19	64.18	17	0.5914	0.00791155	25.6564	25.641	25.6454	26.0005	26.4769	26.2397
TR120_ARATH	sp|Q9FY61|TR120_ARATH Trafficking protein particle complex II-specific subunit 120 homolog OS=Arabidopsis thaliana OX=3702 GN=TRS120 PE=1 SV=1	TRS120	129595	13	18.55	7	0.590767	0.186737	23.4833	23.0698	23.1114	24.0871	24.3983	22.9514
GME_ARATH	sp|Q93VR3|GME_ARATH GDP-mannose 3,5-epimerase OS=Arabidopsis thaliana OX=3702 GN=At5g28840 PE=1 SV=1	At5g28840	42758	25	61.54	24	0.590697	0.00700039	28.045	28.1737	27.8919	28.4385	28.7912	28.6531
A0A5S9Y6C6_ARATH	tr|A0A5S9Y6C6|A0A5S9Y6C6_ARATH HTH La-type RNA-binding domain-containing protein OS=Arabidopsis thaliana OX=3702 GN=C24_LOCUS22798 PE=4 SV=1	C24_LOCUS22798	91261	6	11.15	5	0.590035	0.0847731	22.4805	23.2581	23.423	23.5157	23.5003	23.9157
LEU31_ARATH	sp|Q9FMT1|LEU31_ARATH 3-isopropylmalate dehydrogenase 1, chloroplastic OS=Arabidopsis thaliana OX=3702 GN=IMDH1 PE=1 SV=1	IMDH1	44162	38	69.68	36	0.589375	0.00845973	29.2024	29.6215	29.552	29.9836	30.1544	30.0061
B0ZVY9_ARATH	tr|B0ZVY9|B0ZVY9_ARATH NHL3 (Fragment) OS=Arabidopsis thaliana OX=3702 GN=NHL3 PE=4 SV=1	NHL3	19876	5	29.65	5	0.589184	0.0274961	24.5891	24.7138	25.1001	25.6733	25.1812	25.3159
AKRC8_ARATH	sp|O80944|AKRC8_ARATH Aldo-keto reductase family 4 member C8 OS=Arabidopsis thaliana OX=3702 GN=AKR4C8 PE=1 SV=2	AKR4C8	34685	13	59.49	11	0.586713	0.0936645	25.4682	24.4196	25.1292	25.7819	25.3664	25.6288
PP190_ARATH	sp|Q9ZUU3|PP190_ARATH Pentatricopeptide repeat-containing protein At2g37230 OS=Arabidopsis thaliana OX=3702 GN=At2g37230 PE=2 SV=1	At2g37230	85705	5	7.13	2	0.586239	0.261864	21.4012	20.7012	21.4412	20.781	22.3896	22.1318
GSTU5_ARATH	sp|P46421|GSTU5_ARATH Glutathione S-transferase U5 OS=Arabidopsis thaliana OX=3702 GN=GSTU5 PE=2 SV=1	GSTU5	26000	16	70.09	14	0.586099	0.00750183	25.4749	25.8548	25.5378	26.2685	26.0853	26.2722
LACS7_ARATH	sp|Q8LKS5|LACS7_ARATH Long chain acyl-CoA synthetase 7, peroxisomal OS=Arabidopsis thaliana OX=3702 GN=LACS7 PE=1 SV=2	LACS7	77353	9	16.86	6	0.585916	0.0879245	23.2577	22.5555	22.4965	23.644	22.9446	23.4789
BCHC2_ARATH	sp|F4IG73|BCHC2_ARATH BEACH domain-containing protein C2 OS=Arabidopsis thaliana OX=3702 GN=BCHC2 PE=1 SV=1	BCHC2	328092	25	14	17	0.585678	0.0166962	24.8858	24.5435	24.2825	25.1167	25.219	25.1332
GDL32_ARATH	sp|Q9SIF5|GDL32_ARATH GDSL esterase/lipase At2g03980 OS=Arabidopsis thaliana OX=3702 GN=At2g03980 PE=2 SV=1	At2g03980	40758	4	20.44	4	0.585385	0.0803809	22.5074	23.2832	22.9509	23.5403	23.1071	23.8502
A0A384KJJ8_ARATH	tr|A0A384KJJ8|A0A384KJJ8_ARATH RRM domain-containing protein OS=Arabidopsis thaliana OX=3702 GN=At2g46780 PE=4 SV=1	At2g46780	36705	3	11.01	1	0.582528	0.020049	22.2148	22.0563	22.5065	22.5848	22.906	23.0345
PS10A_ARATH	sp|Q9SEI3|PS10A_ARATH 26S proteasome regulatory subunit 10B homolog A OS=Arabidopsis thaliana OX=3702 GN=RPT4A PE=1 SV=1	RPT4A	44817	29	70.43	2	0.5817	0.11041	22.2189	23.0158	22.2168	22.6149	23.3776	23.2041
RMLCD_ARATH	sp|Q9LQ04|RMLCD_ARATH Bifunctional dTDP-4-dehydrorhamnose 3,5-epimerase/dTDP-4-dehydrorhamnose reductase OS=Arabidopsis thaliana OX=3702 GN=NRS/ER PE=1 SV=1	NRS/ER	33597	22	69.77	16	0.580192	0.0947498	26.7121	27.3052	26.9444	27.8399	27.8559	27.0065
A0A178VNP5_ARATH	tr|A0A178VNP5|A0A178VNP5_ARATH (thale cress) hypothetical protein OS=Arabidopsis thaliana OX=3702 GN=AXX17_At2g26830 PE=1 SV=1	AXX17_At2g26830	51506	5	13.18	5	0.57997	0.247397	23.6297	22.1992	22.7227	22.8675	23.437	23.987
CALSC_ARATH	sp|Q9ZT82|CALSC_ARATH Callose synthase 12 OS=Arabidopsis thaliana OX=3702 GN=CALS12 PE=2 SV=1	CALS12	206912	9	6.4	9	0.579849	0.163453	23.8106	22.5932	23.1591	24.1938	23.4038	23.7049
MORF9_ARATH	sp|Q9LPZ1|MORF9_ARATH Multiple organellar RNA editing factor 9, chloroplastic OS=Arabidopsis thaliana OX=3702 GN=MORF9 PE=1 SV=1	MORF9	26201	4	29.74	4	0.579817	0.0253193	23.1207	23.6597	23.0545	23.8165	23.9858	23.772
TRXX_ARATH	sp|Q8LD49|TRXX_ARATH Thioredoxin X, chloroplastic OS=Arabidopsis thaliana OX=3702 GN=ATHX PE=2 SV=2	ATHX	19648	2	14.29	2	0.57978	0.0321228	22.3155	22.5521	22.9753	23.4001	23.1297	23.0525
ANM10_ARATH	sp|Q9MAT5|ANM10_ARATH Protein arginine N-methyltransferase PRMT10 OS=Arabidopsis thaliana OX=3702 GN=PRMT10 PE=1 SV=1	PRMT10	43130	3	8.88	3	0.57962	0.356198	21.4765	21.2976	22.9083	22.3553	23.3153	21.7507
OE64C_ARATH	sp|Q9LVH5|OE64C_ARATH Outer envelope protein 64, chloroplastic OS=Arabidopsis thaliana OX=3702 GN=OEP64 PE=1 SV=1	OEP64	64025	13	34.47	13	0.57927	0.0350156	24.9114	24.5529	24.3046	25.1813	24.9166	25.4088
SNX2A_ARATH	sp|Q8L5Z7|SNX2A_ARATH Sorting nexin 2A OS=Arabidopsis thaliana OX=3702 GN=SNX2A PE=1 SV=1	SNX2A	65527	12	25.04	9	0.577005	0.220571	23.8531	24.4298	22.7834	24.1019	24.4118	24.2835
NDUA2_ARATH	sp|Q9FIJ2|NDUA2_ARATH NADH dehydrogenase [ubiquinone] 1 alpha subcomplex subunit 2 OS=Arabidopsis thaliana OX=3702 GN=At5g47890 PE=1 SV=1	At5g47890	10851	3	36.08	3	0.576239	0.00126953	24.2104	24.1224	24.118	24.7118	24.71	24.7577
U92A1_ARATH	sp|Q9LXV0|U92A1_ARATH UDP-glycosyltransferase 92A1 OS=Arabidopsis thaliana OX=3702 GN=UGT92A1 PE=2 SV=1	UGT92A1	54868	6	18.03	4	0.576136	0.177925	23.5868	22.3776	23.3795	23.7466	24.0491	23.2766
AL3F1_ARATH	sp|Q70E96|AL3F1_ARATH Aldehyde dehydrogenase family 3 member F1 OS=Arabidopsis thaliana OX=3702 GN=ALDH3F1 PE=2 SV=2	ALDH3F1	53615	14	36.78	13	0.576091	0.00621707	26.0912	26.3181	25.9716	26.6303	26.8275	26.6514
ETFA_ARATH	sp|Q9C6I6|ETFA_ARATH Electron transfer flavoprotein subunit alpha, mitochondrial OS=Arabidopsis thaliana OX=3702 GN=ETFA PE=1 SV=1	ETFA	38408	10	43.8	10	0.575864	0.0383214	24.7984	24.3479	24.9873	25.061	25.5238	25.2764
RTNLD_ARATH	sp|Q9FFS0|RTNLD_ARATH Reticulon-like protein B4 OS=Arabidopsis thaliana OX=3702 GN=RTNLB4 PE=1 SV=1	RTNLB4	28949	9	46.69	5	0.574841	0.0503939	25.4886	25.8625	25.239	26.2625	25.7454	26.3067
GDL71_ARATH	sp|Q9LZS7|GDL71_ARATH GDSL esterase/lipase At5g03610 OS=Arabidopsis thaliana OX=3702 GN=At5g03610 PE=2 SV=1	At5g03610	40106	5	17.55	4	0.574585	0.0977517	21.2183	21.4573	22.0076	22.1596	22.5267	21.7206
A0A5S9Y635_ARATH	tr|A0A5S9Y635|A0A5S9Y635_ARATH Uncharacterized protein OS=Arabidopsis thaliana OX=3702 GN=C24_LOCUS22582 PE=4 SV=1	C24_LOCUS22582	30212	1	5	1	0.574217	0.024781	19.8094	19.6645	19.3664	20.2763	20.3905	19.8961
PLSB_ARATH	sp|Q43307|PLSB_ARATH Glycerol-3-phosphate acyltransferase, chloroplastic OS=Arabidopsis thaliana OX=3702 GN=ATS1 PE=1 SV=2	ATS1	50421	9	32.68	8	0.571983	0.079074	24.1752	24.2758	25.0625	25.2964	24.9705	24.9625
RR4_ARATH	sp|P56799|RR4_ARATH 30S ribosomal protein S4, chloroplastic OS=Arabidopsis thaliana OX=3702 GN=rps4 PE=3 SV=1	rps4	23240	13	63.68	13	0.57175	0.156714	26.2844	27.1164	25.7612	27.1405	26.8282	26.9085
VTI12_ARATH	sp|Q9SEL5|VTI12_ARATH Vesicle transport v-SNARE 12 OS=Arabidopsis thaliana OX=3702 GN=VTI12 PE=1 SV=3	VTI12	25057	4	31.08	3	0.571695	0.0771323	22.0399	23.0382	22.6373	23.2614	23.0215	23.1477
AVP2_ARATH	sp|Q56ZN6|AVP2_ARATH Pyrophosphate-energized membrane proton pump 2 OS=Arabidopsis thaliana OX=3702 GN=AVPL1 PE=1 SV=2	AVPL1	85133	4	5.61	4	0.571347	0.221954	23.7673	22.6985	22.2859	23.8468	23.4873	23.1316
M2K4_ARATH	sp|O80397|M2K4_ARATH Mitogen-activated protein kinase kinase 4 OS=Arabidopsis thaliana OX=3702 GN=MKK4 PE=1 SV=1	MKK4	40117	4	11.75	1	0.571327	0.00281616	20.4553	20.4218	20.2822	21.07	20.9252	20.8781
GCT23_ARATH	sp|Q84QC1|GCT23_ARATH Gamma-glutamylcyclotransferase 2-3 OS=Arabidopsis thaliana OX=3702 GN=GGCT2;3 PE=1 SV=1	GGCT2;3	22229	3	21.11	3	0.570983	0.278082	21.8452	21.7676	20.9579	21.1485	22.7381	22.3971
A0A5S9Y814_ARATH	tr|A0A5S9Y814|A0A5S9Y814_ARATH Threonine--tRNA ligase OS=Arabidopsis thaliana OX=3702 GN=C24_LOCUS23297 PE=3 SV=1	C24_LOCUS23297	77279	31	61.24	1	0.570719	0.0419497	23.0799	23.6342	23.8556	24.199	24.0167	24.0662
ESM1_ARATH	sp|Q9LJG3|ESM1_ARATH GDSL esterase/lipase ESM1 OS=Arabidopsis thaliana OX=3702 GN=ESM1 PE=1 SV=1	ESM1	44060	5	15.05	4	0.570696	0.409197	21.3284	22.9857	23.5111	23.6465	23.4684	22.4224
A0A5S9X1Q8_ARATH	tr|A0A5S9X1Q8|A0A5S9X1Q8_ARATH (thale cress) hypothetical protein OS=Arabidopsis thaliana OX=3702 GN=AT9943_LOCUS7838 PE=4 SV=1	AT9943_LOCUS7838	82585	9	17.45	9	0.569893	0.0107673	24.3706	24.1929	23.9403	24.5884	24.8114	24.8136
VP35C_ARATH	sp|A8R7K9|VP35C_ARATH Vacuolar protein sorting-associated protein 35C OS=Arabidopsis thaliana OX=3702 GN=VPS35C PE=2 SV=1	VPS35C	89405	13	23.42	10	0.569447	0.0295229	24.0384	24.189	24.6247	24.9806	24.6294	24.9503
CDKA1_ARATH	sp|P24100|CDKA1_ARATH Cyclin-dependent kinase A-1 OS=Arabidopsis thaliana OX=3702 GN=CDKA-1 PE=1 SV=1	CDKA-1	34030	15	54.76	14	0.567846	0.387439	25.6474	26.0164	26.0594	25.6208	27.8795	25.9265
A0A178VT14_ARATH	tr|A0A178VT14|A0A178VT14_ARATH Uncharacterized protein OS=Arabidopsis thaliana OX=3702 GN=At2g16940 PE=1 SV=1	At2g16940	63099	2	4.28	2	0.565989	0.286509	23.4596	21.5162	22.2799	23.0032	23.0404	22.9102
ECT2_ARATH	sp|Q9LJE5|ECT2_ARATH YTH domain-containing protein ECT2 OS=Arabidopsis thaliana OX=3702 GN=ECT2 PE=1 SV=1	ECT2	72475	10	24.59	9	0.565653	0.00919487	24.1952	23.892	24.2525	24.8134	24.5502	24.6731
NUDT7_ARATH	sp|Q9SU14|NUDT7_ARATH Nudix hydrolase 7 OS=Arabidopsis thaliana OX=3702 GN=NUDT7 PE=1 SV=1	NUDT7	31884	13	61.7	12	0.564859	0.0160186	26.032	25.8921	25.6297	26.5233	26.1824	26.5427
A0A178V1Z2_ARATH	tr|A0A178V1Z2|A0A178V1Z2_ARATH Hydrophob_seed domain-containing protein OS=Arabidopsis thaliana OX=3702 GN=AXX17_At4g17590 PE=3 SV=1	AXX17_At4g17590	29730	1	6.36	1	0.563418	0.293499	20.6198	22.334	21.8021	21.6938	22.6237	22.1286
P2C39_ARATH	sp|Q9LDA7|P2C39_ARATH Probable protein phosphatase 2C 39 OS=Arabidopsis thaliana OX=3702 GN=At3g15260 PE=2 SV=1	At3g15260	31630	6	19.72	4	0.562601	0.439052	23.0784	20.8061	21.4868	23.2277	21.8524	21.979
TSN1_ARATH	sp|Q8VZG7|TSN1_ARATH Ribonuclease TUDOR 1 OS=Arabidopsis thaliana OX=3702 GN=TSN1 PE=1 SV=1	TSN1	108235	53	62.87	30	0.562202	0.00411035	27.2435	27.4689	27.1826	27.7939	27.888	27.8997
KHSE_ARATH	sp|Q8L7R2|KHSE_ARATH Homoserine kinase OS=Arabidopsis thaliana OX=3702 GN=HSK PE=1 SV=1	HSK	38529	22	72.43	18	0.560401	0.00310718	27.2525	27.3432	27.3134	27.782	28.0112	27.7972
TMN7_ARATH	sp|Q9LIC2|TMN7_ARATH Transmembrane 9 superfamily member 7 OS=Arabidopsis thaliana OX=3702 GN=TMN7 PE=2 SV=1	TMN7	74234	11	17.32	8	0.559116	0.201059	23.3335	24.7897	24.047	24.4401	24.4685	24.939
TMN12_ARATH	sp|F4JRE0|TMN12_ARATH Transmembrane 9 superfamily member 12 OS=Arabidopsis thaliana OX=3702 GN=TMN12 PE=2 SV=1	TMN12	74140	18	26.53	17	0.558931	0.0100001	25.7766	25.8581	25.5743	26.0797	26.3927	26.4133
PRX2B_ARATH	sp|Q9XEX2|PRX2B_ARATH Peroxiredoxin-2B OS=Arabidopsis thaliana OX=3702 GN=PRXIIB PE=1 SV=1	PRXIIB	17428	19	88.89	15	0.558027	0.00494504	27.487	27.437	27.5488	27.9768	28.238	27.932
ATL6_ARATH	sp|Q8RXX9|ATL6_ARATH E3 ubiquitin-protein ligase ATL6 OS=Arabidopsis thaliana OX=3702 GN=ATL6 PE=1 SV=2	ATL6	43274	1	3.52	1	0.556998	0.0147401	20.6836	20.1647	20.5159	21.0267	21.0708	20.9378
A0A654G6D8_ARATH	tr|A0A654G6D8|A0A654G6D8_ARATH Uncharacterized protein OS=Arabidopsis thaliana OX=3702 GN=At5g39080 PE=4 SV=1	At5g39080	51485	2	7.13	2	0.555755	0.140598	21.078	21.1436	21.0657	22.3395	21.0597	21.5554
A0A384LB20_ARATH	tr|A0A384LB20|A0A384LB20_ARATH Uncharacterized protein OS=Arabidopsis thaliana OX=3702 GN=At3g15410 PE=4 SV=1	At3g15410	64104	6	15.58	3	0.555103	0.064433	21.8596	21.7197	22.1303	22.4734	22.0349	22.8667
ALAT1_ARATH	sp|F4I7I0|ALAT1_ARATH Alanine aminotransferase 1, mitochondrial OS=Arabidopsis thaliana OX=3702 GN=ALAAT1 PE=1 SV=1	ALAAT1	59821	32	57.09	29	0.554063	0.0030886	28.873	28.7335	28.9384	29.3278	29.3945	29.4847
AP2M_ARATH	sp|O23140|AP2M_ARATH AP-2 complex subunit mu OS=Arabidopsis thaliana OX=3702 GN=AP2M PE=1 SV=1	AP2M	49322	12	35.62	12	0.554033	0.00396961	25.8873	25.9102	25.6802	26.3639	26.3037	26.4723
A0A178W7C4_ARATH	tr|A0A178W7C4|A0A178W7C4_ARATH Signal peptidase I OS=Arabidopsis thaliana OX=3702 GN=At1g52600 PE=3 SV=1	At1g52600	20022	6	29.44	6	0.553909	0.00178449	24.949	25.0312	24.8786	25.4972	25.5164	25.5069
COPG_ARATH	sp|Q0WW26|COPG_ARATH Coatomer subunit gamma OS=Arabidopsis thaliana OX=3702 GN=At4g34450 PE=1 SV=2	At4g34450	98491	64	79.8	59	0.553585	0.00340372	29.8184	29.5503	29.6727	30.1928	30.2466	30.2627
SPC3A_ARATH	sp|Q9MA96|SPC3A_ARATH Signal peptidase complex subunit 3A OS=Arabidopsis thaliana OX=3702 GN=At3g05230 PE=2 SV=1	At3g05230	19019	2	19.76	2	0.553407	0.0615467	22.7416	22.597	22.7251	23.3443	22.7499	23.6297
SDEH3_ARATH	sp|Q9SD22|SDEH3_ARATH Senescence/dehydration-associated protein At3g51250 OS=Arabidopsis thaliana OX=3702 GN=At3g51250 PE=2 SV=1	At3g51250	49904	2	6.7	2	0.553299	0.151114	22.0969	22.7293	22.1574	23.263	23.1513	22.2293
CK5P3_ARATH	sp|Q9FG23|CK5P3_ARATH CDK5RAP3-like protein OS=Arabidopsis thaliana OX=3702 GN=At5g06830 PE=2 SV=2	At5g06830	62129	5	14.03	4	0.55286	0.475058	21.9613	21.6194	21.3824	20.8191	23.7322	22.0704
PUX11_ARATH	sp|Q9ZW74|PUX11_ARATH Plant UBX domain-containing protein 11 OS=Arabidopsis thaliana OX=3702 GN=PUX11 PE=1 SV=2	PUX11	57099	2	5.08	2	0.551627	0.0228887	20.6931	20.3554	20.1326	21.0222	21.0333	20.7804
A0A384KAM9_ARATH	tr|A0A384KAM9|A0A384KAM9_ARATH Protein kinase domain-containing protein OS=Arabidopsis thaliana OX=3702 GN=AXX17_At5g14220 PE=1 SV=1	AXX17_At5g14220	75364	10	23.59	9	0.550821	0.203422	23.3064	23.926	24.4103	25.0547	24.1268	24.1137
U496C_ARATH	sp|Q9LHD9|U496C_ARATH UPF0496 protein At3g28270 OS=Arabidopsis thaliana OX=3702 GN=At3g28270 PE=2 SV=1	At3g28270	41613	14	40.11	12	0.549655	0.344798	26.9736	26.9408	25.0772	27.0089	26.8522	26.7794
Y1814_ARATH	sp|Q8LBV4|Y1814_ARATH Uncharacterized methyltransferase At1g78140, chloroplastic OS=Arabidopsis thaliana OX=3702 GN=At1g78140 PE=1 SV=1	At1g78140	39387	3	8.45	2	0.54959	0.206953	22.0613	21.582	22.6938	23.021	22.9278	22.0371
A0A178WHV7_ARATH	tr|A0A178WHV7|A0A178WHV7_ARATH AD domain-containing protein OS=Arabidopsis thaliana OX=3702 GN=At1g24050 PE=1 SV=1	At1g24050	20491	5	44.15	3	0.549343	0.107632	21.3273	21.5382	22.1618	22.0511	21.9811	22.6431
BON2_ARATH	sp|Q5S1W2|BON2_ARATH Protein BONZAI 2 OS=Arabidopsis thaliana OX=3702 GN=BON2 PE=1 SV=2	BON2	64033	7	15.19	6	0.548616	0.188785	23.7622	24.9348	24.2494	24.3772	24.962	25.2531
U89C1_ARATH	sp|Q9LNE6|U89C1_ARATH Flavonol 7-O-rhamnosyltransferase OS=Arabidopsis thaliana OX=3702 GN=UGT89C1 PE=1 SV=1	UGT89C1	48122	11	40.92	9	0.548027	0.0219923	24.5676	24.5073	25.0148	25.4017	25.1751	25.157
RAF1_ARATH	sp|Q9LKR8|RAF1_ARATH Rubisco accumulation factor 1.1, chloroplastic OS=Arabidopsis thaliana OX=3702 GN=RAF1.1 PE=1 SV=1	RAF1.1	48237	8	33.41	6	0.547109	0.0958006	23.9104	24.4162	24.2765	24.8246	24.2461	25.1738
NRPB1_ARATH	sp|P18616|NRPB1_ARATH DNA-directed RNA polymerase II subunit RPB1 OS=Arabidopsis thaliana OX=3702 GN=NRPB1 PE=1 SV=3	NRPB1	204626	7	4.68	6	0.545821	0.59011	23.4208	20.4938	23.5827	23.0567	22.0951	23.9829
PSME4_ARATH	sp|F4JC97|PSME4_ARATH Proteasome activator subunit 4 OS=Arabidopsis thaliana OX=3702 GN=PA200 PE=2 SV=2	PA200	202946	16	11.93	12	0.545773	0.0310874	24.2448	23.9768	24.0913	24.2878	24.9004	24.7619
A0A178W4U8_ARATH	tr|A0A178W4U8|A0A178W4U8_ARATH Uncharacterized protein OS=Arabidopsis thaliana OX=3702 GN=AXX17_At1g66310 PE=3 SV=1	AXX17_At1g66310	10752	3	47.06	3	0.545115	0.243089	23.5052	23.4487	22.0136	23.5374	23.4643	23.6012
A0A178UFQ0_ARATH	tr|A0A178UFQ0|A0A178UFQ0_ARATH TSBtype2 OS=Arabidopsis thaliana OX=3702 GN=AXX17_At5g35860 PE=3 SV=1	AXX17_At5g35860	55756	4	14.03	4	0.543146	0.00862084	23.2455	23.2454	23.3253	23.6508	23.7467	24.0481
OST1B_ARATH	sp|Q9ZUA0|OST1B_ARATH Dolichyl-diphosphooligosaccharide--protein glycosyltransferase subunit 1B OS=Arabidopsis thaliana OX=3702 GN=OST1B PE=1 SV=1	OST1B	52219	16	40.3	14	0.542287	0.0301364	26.4964	26.1657	25.8417	26.6161	26.7046	26.81
A0A7G2DV13_ARATH	tr|A0A7G2DV13|A0A7G2DV13_ARATH (thale cress) hypothetical protein OS=Arabidopsis thaliana OX=3702 GN=AT9943_LOCUS2941 PE=4 SV=1	AT9943_LOCUS2941	121991	1	1.21	1	0.541648	0.0239998	22.154	21.9894	21.8972	22.2367	22.7884	22.6404
CHLM_ARATH	sp|Q9SW18|CHLM_ARATH Magnesium protoporphyrin IX methyltransferase, chloroplastic OS=Arabidopsis thaliana OX=3702 GN=CHLM PE=1 SV=1	CHLM	33796	24	57.69	24	0.540103	0.0236405	27.7519	27.8879	27.3093	28.2721	28.1487	28.1486
A0A178WGM0_ARATH	tr|A0A178WGM0|A0A178WGM0_ARATH (thale cress) hypothetical protein OS=Arabidopsis thaliana OX=3702 GN=AXX17_At1g00180 PE=4 SV=1	AXX17_At1g00180	9062	5	49.4	3	0.539987	0.0916768	23.1987	22.3364	22.4584	23.1867	23.4397	22.9871
CDSP_ARATH	sp|Q9SGS4|CDSP_ARATH Thioredoxin-like protein CDSP32, chloroplastic OS=Arabidopsis thaliana OX=3702 GN=CDSP32 PE=1 SV=1	CDSP32	33685	7	25.17	6	0.53916	0.252527	24.4735	24.6738	23.1257	24.7333	24.7208	24.4364
CP121_ARATH	sp|O22914|CP121_ARATH Calvin cycle protein CP12-1, chloroplastic OS=Arabidopsis thaliana OX=3702 GN=CP12-1 PE=1 SV=1	CP12-1	13487	6	60.48	4	0.538484	0.130616	25.9571	25.0403	25.7269	26.5279	25.9946	25.8172
OEP61_ARATH	sp|B7ZWR6|OEP61_ARATH Outer envelope protein 61 OS=Arabidopsis thaliana OX=3702 GN=OEP61 PE=1 SV=1	OEP61	60757	5	14.98	4	0.537413	0.252052	22.439	21.1468	21.0315	22.0638	22.4286	21.7372
OPR3_ARATH	sp|Q9FUP0|OPR3_ARATH 12-oxophytodienoate reductase 3 OS=Arabidopsis thaliana OX=3702 GN=OPR3 PE=1 SV=2	OPR3	42691	8	33.76	6	0.536962	0.00758143	24.2778	23.9718	23.954	24.6779	24.53	24.6068
AKH2_ARATH	sp|O81852|AKH2_ARATH Bifunctional aspartokinase/homoserine dehydrogenase 2, chloroplastic OS=Arabidopsis thaliana OX=3702 GN=AKHSDH2 PE=1 SV=1	AKHSDH2	100250	11	16.16	4	0.536955	0.202135	22.2391	21.4545	21.7191	22.9866	22.3185	21.7185
CRD1_ARATH	sp|Q9M591|CRD1_ARATH Magnesium-protoporphyrin IX monomethyl ester [oxidative] cyclase, chloroplastic OS=Arabidopsis thaliana OX=3702 GN=CRD1 PE=1 SV=2	CRD1	47631	20	55.5	17	0.535842	0.00556961	25.8945	25.973	25.6897	26.4261	26.292	26.4467
A0A7G2F2D5_ARATH	tr|A0A7G2F2D5|A0A7G2F2D5_ARATH (thale cress) hypothetical protein OS=Arabidopsis thaliana OX=3702 GN=AT9943_LOCUS17247 PE=3 SV=1	AT9943_LOCUS17247	89957	9	15.36	7	0.535735	0.0273993	23.983	24.0674	24.165	24.2612	24.697	24.8644
AL121_ARATH	sp|Q8VZC3|AL121_ARATH Delta-1-pyrroline-5-carboxylate dehydrogenase 12A1, mitochondrial OS=Arabidopsis thaliana OX=3702 GN=ALDH12A1 PE=1 SV=1	ALDH12A1	61773	33	67.63	30	0.535436	0.00227627	27.9769	27.8992	27.9861	28.5418	28.5181	28.4086
TRM9_ARATH	sp|Q94A09|TRM9_ARATH tRNA (carboxymethyluridine(34)-5-O)-methyltransferase OS=Arabidopsis thaliana OX=3702 GN=TRM9 PE=1 SV=1	TRM9	44960	4	13.12	3	0.534906	0.147987	22.4349	23.4688	23.5516	23.5494	23.8064	23.7042
RGP2_ARATH	sp|Q9LFW1|RGP2_ARATH UDP-arabinopyranose mutase 2 OS=Arabidopsis thaliana OX=3702 GN=RGP2 PE=1 SV=1	RGP2	40890	41	95	38	0.534792	0.00209373	29.8932	29.9341	29.982	30.5414	30.4309	30.4414
TET8_ARATH	sp|Q8S8Q6|TET8_ARATH Tetraspanin-8 OS=Arabidopsis thaliana OX=3702 GN=TET8 PE=2 SV=1	TET8	30658	6	30.04	5	0.534193	0.0512594	24.2437	23.9769	24.6561	24.9416	24.5713	24.9664
RCE1_ARATH	sp|Q9SDY5|RCE1_ARATH NEDD8-conjugating enzyme Ubc12 OS=Arabidopsis thaliana OX=3702 GN=RCE1 PE=1 SV=1	RCE1	20787	1	9.78	1	0.533582	0.0349682	22.6807	22.0643	22.3452	22.9563	22.7039	23.0307
CYC1A_ARATH	sp|Q9LK29|CYC1A_ARATH Cytochrome c1 1, heme protein, mitochondrial OS=Arabidopsis thaliana OX=3702 GN=CYC1-1 PE=1 SV=1	CYC1-1	33650	15	48.53	3	0.532452	0.0189988	25.27	25.7514	25.6142	25.9286	26.1261	26.1783
Q0WWW1_ARATH	tr|Q0WWW1|Q0WWW1_ARATH Glycine--tRNA ligase (Fragment) OS=Arabidopsis thaliana OX=3702 GN=At1g29880 PE=2 SV=1	At1g29880	58182	33	62.43	1	0.532387	0.0144686	21.4191	21.1368	21.3727	21.7246	21.7252	22.076
CSN5A_ARATH	sp|Q8LAZ7|CSN5A_ARATH COP9 signalosome complex subunit 5a OS=Arabidopsis thaliana OX=3702 GN=CSN5A PE=1 SV=2	CSN5A	39731	6	30.25	4	0.532345	0.0123567	23.5191	23.7421	23.9456	24.3657	24.281	24.1572
TRPA2_ARATH	sp|Q42529|TRPA2_ARATH Tryptophan synthase alpha chain, chloroplastic OS=Arabidopsis thaliana OX=3702 GN=TSA1 PE=1 SV=1	TSA1	33200	14	65.38	13	0.531782	0.00234714	27.0166	27.0055	26.9662	27.5473	27.5976	27.4388
A0A178UCX4_ARATH	tr|A0A178UCX4|A0A178UCX4_ARATH (thale cress) hypothetical protein OS=Arabidopsis thaliana OX=3702 GN=At5g55530 PE=1 SV=1	At5g55530	44127	5	19.75	5	0.531522	0.309336	23.3075	23.0523	21.575	23.3345	23.3174	22.8775
A0A178UUA0_ARATH	tr|A0A178UUA0|A0A178UUA0_ARATH Trafficking protein particle complex subunit OS=Arabidopsis thaliana OX=3702 GN=At5g54750 PE=3 SV=1	At5g54750	20760	11	61.83	10	0.531391	0.0494317	25.3886	25.6003	26.0495	26.0092	26.1889	26.4345
NIFU5_ARATH	sp|Q9C8J2|NIFU5_ARATH NifU-like protein 5, mitochondrial OS=Arabidopsis thaliana OX=3702 GN=NIFU5 PE=2 SV=1	NIFU5	29972	3	18.91	2	0.530306	0.249467	21.094	20.873	21.2051	20.9277	22.5056	21.3297
SPCS2_ARATH	sp|P58684|SPCS2_ARATH Signal peptidase complex subunit 2 OS=Arabidopsis thaliana OX=3702 GN=At2g39960 PE=2 SV=1	At2g39960	21642	7	45.31	6	0.530213	0.0415304	24.549	24.6893	25.2291	25.3974	25.2366	25.424
CDPK1_ARATH	sp|Q06850|CDPK1_ARATH Calcium-dependent protein kinase 1 OS=Arabidopsis thaliana OX=3702 GN=CPK1 PE=1 SV=1	CPK1	68254	8	17.38	7	0.530154	0.0706303	24.2014	24.1226	23.615	24.6516	24.7429	24.1349
RRAA3_ARATH	sp|Q9FH13|RRAA3_ARATH Putative 4-hydroxy-4-methyl-2-oxoglutarate aldolase 3 OS=Arabidopsis thaliana OX=3702 GN=At5g56260 PE=1 SV=1	At5g56260	17567	5	31.33	5	0.529442	0.401898	23.0002	24.4659	24.5362	24.8262	23.5944	25.1699
YB95_ARATH	sp|Q8W487|YB95_ARATH Uncharacterized protein At2g39795, mitochondrial OS=Arabidopsis thaliana OX=3702 GN=At2g39795 PE=1 SV=1	At2g39795	28061	2	8.4	2	0.527911	0.0513345	21.568	21.6853	21.4862	21.7768	22.5365	22.0099
EFTS_ARATH	sp|Q5XF75|EFTS_ARATH Elongation factor Ts, mitochondrial OS=Arabidopsis thaliana OX=3702 GN=EFTS PE=1 SV=1	EFTS	43191	10	40.25	10	0.527727	0.0124761	25.1263	24.9418	25.1616	25.5146	25.4612	25.8371
A0A654GEA1_ARATH	tr|A0A654GEA1|A0A654GEA1_ARATH Signal recognition particle subunit SRP68 OS=Arabidopsis thaliana OX=3702 GN=At5g61970 PE=3 SV=1	At5g61970	68832	21	47.93	15	0.527333	0.0532895	24.8003	25.2612	25.4826	25.6478	25.9434	25.5349
GRH1_ARATH	sp|Q9ZR12|GRH1_ARATH GRR1-like protein 1 OS=Arabidopsis thaliana OX=3702 GN=GRH1 PE=1 SV=1	GRH1	65648	6	12.48	4	0.527228	0.121454	21.1339	21.7993	21.9406	21.7306	22.4438	22.2811
SPSY_ARATH	sp|Q94BN2|SPSY_ARATH Spermine synthase OS=Arabidopsis thaliana OX=3702 GN=SPMS PE=1 SV=1	SPMS	39239	12	51.53	9	0.526584	0.080484	24.9427	24.2163	24.9857	25.3431	25.3739	25.0075
GAE5_ARATH	sp|Q9STI6|GAE5_ARATH UDP-glucuronate 4-epimerase 5 OS=Arabidopsis thaliana OX=3702 GN=GAE5 PE=2 SV=1	GAE5	48165	2	3.9	1	0.526456	0.0102004	21.2931	21.4021	21.3527	22.1131	21.7916	21.7226
A0A7G2F2Q2_ARATH	tr|A0A7G2F2Q2|A0A7G2F2Q2_ARATH Pyridoxal phosphate homeostasis protein OS=Arabidopsis thaliana OX=3702 GN=At4g26860 PE=3 SV=1	At4g26860	26639	5	25.82	3	0.525283	0.0480315	22.2757	22.9182	22.2542	22.9782	22.9303	23.1156
A0A178UT60_ARATH	tr|A0A178UT60|A0A178UT60_ARATH Epimerase domain-containing protein OS=Arabidopsis thaliana OX=3702 GN=AXX17_At5g19330 PE=4 SV=1	AXX17_At5g19330	35594	23	75.77	23	0.524425	0.0022708	28.2019	28.1905	28.2077	28.8074	28.6972	28.6688
CXE7_ARATH	sp|Q9ZQ91|CXE7_ARATH Probable carboxylesterase 7 OS=Arabidopsis thaliana OX=3702 GN=CXE7 PE=2 SV=1	CXE7	34750	1	6.09	1	0.524405	0.201649	21.7463	21.5116	21.5698	21.5668	22.9431	21.8911
A0A178WL48_ARATH	tr|A0A178WL48|A0A178WL48_ARATH Uncharacterized protein OS=Arabidopsis thaliana OX=3702 GN=At1g16080 PE=1 SV=1	At1g16080	34130	16	65.5	16	0.523625	0.00886237	26.6519	26.4207	26.2709	26.921	26.9581	27.0352
RMD5_ARATH	sp|Q9T075|RMD5_ARATH Protein RMD5 homolog OS=Arabidopsis thaliana OX=3702 GN=RMD5 PE=1 SV=1	RMD5	44359	3	12.37	1	0.52357	0.052779	21.5885	21.8556	21.5411	22.1119	22.5809	21.8631
A0A178V8F0_ARATH	tr|A0A178V8F0|A0A178V8F0_ARATH Alba domain-containing protein OS=Arabidopsis thaliana OX=3702 GN=AXX17_At3g06940 PE=4 SV=1	AXX17_At3g06940	47993	5	13.02	4	0.523495	0.114673	22.3922	22.3564	22.506	23.1818	23.3264	22.3169
GAGT3_ARATH	sp|Q9M0G0|GAGT3_ARATH Glutathione hydrolase 3 OS=Arabidopsis thaliana OX=3702 GN=GGT3 PE=2 SV=1	GGT3	69148	7	10.99	7	0.523452	0.0114774	25.0056	24.9802	24.8691	25.4655	25.2681	25.6917
UBE4_ARATH	sp|Q9LF41|UBE4_ARATH Probable ubiquitin conjugation factor E4 OS=Arabidopsis thaliana OX=3702 GN=PUB1 PE=2 SV=1	PUB1	117528	9	11.85	8	0.52259	0.0131034	23.8865	24.2619	24.2852	24.6897	24.7281	24.5836
PHOT2_ARATH	sp|P93025|PHOT2_ARATH Phototropin-2 OS=Arabidopsis thaliana OX=3702 GN=PHOT2 PE=1 SV=2	PHOT2	102472	9	15.3	7	0.522019	0.557239	23.5229	23.7846	23.5654	22.3807	24.2336	25.8246
COPD_ARATH	sp|Q93Y22|COPD_ARATH Coatomer subunit delta OS=Arabidopsis thaliana OX=3702 GN=At5g05010 PE=1 SV=2	At5g05010	57719	24	55.41	23	0.521597	0.0068237	27.8038	28.066	27.9303	28.365	28.4124	28.5874
HMGB5_ARATH	sp|O49597|HMGB5_ARATH High mobility group B protein 5 OS=Arabidopsis thaliana OX=3702 GN=HMGB5 PE=2 SV=1	HMGB5	14203	1	12	1	0.521561	0.0213095	21.9878	22.198	21.8935	22.3605	22.4679	22.8156
RL7A1_ARATH	sp|P49692|RL7A1_ARATH 60S ribosomal protein L7a-1 OS=Arabidopsis thaliana OX=3702 GN=RPL7AA PE=2 SV=2	RPL7AA	29130	22	63.04	21	0.52145	0.00492739	28.8557	29.0545	29.1277	29.5547	29.4849	29.5626
TIC_ARATH	sp|Q94KE2|TIC_ARATH Protein TIME FOR COFFEE OS=Arabidopsis thaliana OX=3702 GN=TIC PE=1 SV=2	TIC	164456	3	2.97	3	0.520058	0.339798	21.1939	21.3371	19.9997	21.5562	21.9541	20.5805
SDHB2_ARATH	sp|Q8LB02|SDHB2_ARATH Succinate dehydrogenase [ubiquinone] iron-sulfur subunit 2, mitochondrial OS=Arabidopsis thaliana OX=3702 GN=SDH2-2 PE=1 SV=2	SDH2-2	31141	18	47.14	15	0.520038	0.00646246	26.7249	26.8008	26.9191	27.4456	27.3802	27.1792
CPSF3_ARATH	sp|Q9C952|CPSF3_ARATH Cleavage and polyadenylation specificity factor subunit 3-I OS=Arabidopsis thaliana OX=3702 GN=CPSF73-I PE=1 SV=1	CPSF73-I	77365	7	14.57	5	0.519513	0.0327863	23.5678	23.0325	23.5325	23.7322	24.0041	23.955
RLP51_ARATH	sp|Q9SN38|RLP51_ARATH Receptor-like protein 51 OS=Arabidopsis thaliana OX=3702 GN=RLP51 PE=1 SV=1	RLP51	46071	1	3.71	1	0.518663	0.0161753	21.0264	21.243	20.9504	21.5149	21.8222	21.4387
A0A178V0F0_ARATH	tr|A0A178V0F0|A0A178V0F0_ARATH (thale cress) hypothetical protein OS=Arabidopsis thaliana OX=3702 GN=At4g21445 PE=4 SV=1	At4g21445	17618	2	20.13	2	0.518336	0.100939	20.8638	21.3767	21.2598	21.5679	21.3154	22.1719
DPE2_ARATH	sp|Q8RXD9|DPE2_ARATH 4-alpha-glucanotransferase DPE2 OS=Arabidopsis thaliana OX=3702 GN=DPE2 PE=1 SV=1	DPE2	109777	30	42.51	28	0.518196	0.00203876	26.7676	26.7823	26.7231	27.2655	27.3202	27.242
FOLB2_ARATH	sp|Q9FM54|FOLB2_ARATH Dihydroneopterin aldolase 2 OS=Arabidopsis thaliana OX=3702 GN=FOLB2 PE=1 SV=1	FOLB2	14685	1	16.79	1	0.517148	0.0286216	20.303	20.5787	20.7734	21.2536	20.8454	21.1075
A0A178WJE3_ARATH	tr|A0A178WJE3|A0A178WJE3_ARATH Uncharacterized protein OS=Arabidopsis thaliana OX=3702 GN=AXX17_At1g26210 PE=3 SV=1	AXX17_At1g26210	35753	1	2.79	1	0.517066	0.022415	19.9265	20.2401	20.2036	20.8979	20.565	20.4585
PIP22_ARATH	sp|P43287|PIP22_ARATH Aquaporin PIP2-2 OS=Arabidopsis thaliana OX=3702 GN=PIP2-2 PE=1 SV=2	PIP2-2	30453	9	38.25	5	0.516563	0.0141474	24.6635	24.4127	24.436	24.9616	24.8626	25.2377
A0A178VZJ4_ARATH	tr|A0A178VZJ4|A0A178VZJ4_ARATH Uncharacterized protein OS=Arabidopsis thaliana OX=3702 GN=AXX17_At2g15380 PE=3 SV=1	AXX17_At2g15380	22105	1	6.6	1	0.515213	0.155459	21.5614	21.4674	22.3702	22.4008	21.8998	22.6439
GSTUK_ARATH	sp|Q8L7C9|GSTUK_ARATH Glutathione S-transferase U20 OS=Arabidopsis thaliana OX=3702 GN=GSTU20 PE=1 SV=1	GSTU20	25006	31	76.5	30	0.515177	0.00230792	30.7765	30.7761	30.7908	31.3552	31.3058	31.2279
GSTFA_ARATH	sp|P42761|GSTFA_ARATH Glutathione S-transferase F10 OS=Arabidopsis thaliana OX=3702 GN=GSTF10 PE=1 SV=3	GSTF10	24230	25	69.77	21	0.515016	0.00418139	29.5949	29.5397	29.7497	30.08	30.2111	30.1383
SY121_ARATH	sp|Q9ZSD4|SY121_ARATH Syntaxin-121 OS=Arabidopsis thaliana OX=3702 GN=SYP121 PE=1 SV=1	SYP121	37957	10	36.99	10	0.514908	0.00371605	26.0489	26.0829	26.2131	26.7171	26.6024	26.5701
ENPL_ARATH	sp|Q9STX5|ENPL_ARATH Endoplasmin homolog OS=Arabidopsis thaliana OX=3702 GN=HSP90-7 PE=1 SV=1	HSP90-7	94204	67	70.6	60	0.513712	0.00260447	30.3099	30.2895	30.1813	30.7646	30.743	30.8142
PHB6_ARATH	sp|Q9SIL6|PHB6_ARATH Prohibitin-6, mitochondrial OS=Arabidopsis thaliana OX=3702 GN=PHB6 PE=1 SV=1	PHB6	31637	14	67.83	11	0.513187	0.00576669	26.13	25.92	26.1676	26.4966	26.6412	26.6194
A0A178UK30_ARATH	tr|A0A178UK30|A0A178UK30_ARATH DAO domain-containing protein OS=Arabidopsis thaliana OX=3702 GN=AXX17_At5g46970 PE=4 SV=1	AXX17_At5g46970	49862	4	8.28	4	0.512575	0.0180713	22.4612	22.428	22.0064	22.8475	22.8407	22.7451
BIR2_ARATH	sp|Q9LSI9|BIR2_ARATH Inactive LRR receptor-like serine/threonine-protein kinase BIR2 OS=Arabidopsis thaliana OX=3702 GN=BIR2 PE=1 SV=1	BIR2	66945	7	14.38	4	0.511879	0.465161	20.8486	22.9023	23.0225	22.1872	22.8121	23.3097
COPA2_ARATH	sp|Q9SJT9|COPA2_ARATH Coatomer subunit alpha-2 OS=Arabidopsis thaliana OX=3702 GN=At2g21390 PE=2 SV=1	At2g21390	136467	74	66.01	69	0.511696	0.0198128	29.04	29.3487	29.1144	29.5293	29.583	29.9258
CATA2_ARATH	sp|P25819|CATA2_ARATH Catalase-2 OS=Arabidopsis thaliana OX=3702 GN=CAT2 PE=1 SV=3	CAT2	56931	24	64.84	18	0.510666	0.130135	28.0663	27.8537	27.3083	28.0293	28.0019	28.729
A0A7G2DY67_ARATH	tr|A0A7G2DY67|A0A7G2DY67_ARATH Uridine kinase OS=Arabidopsis thaliana OX=3702 GN=AT9943_LOCUS4020 PE=3 SV=1	AT9943_LOCUS4020	114418	7	9.12	4	0.509622	0.0713379	23.5409	23.3822	24.0389	24.1237	24.4538	23.9134
AP2S_ARATH	sp|Q84WL9|AP2S_ARATH AP-2 complex subunit sigma OS=Arabidopsis thaliana OX=3702 GN=AP17 PE=2 SV=1	AP17	17067	3	23.94	2	0.509538	0.179374	23.6642	23.8949	22.7171	23.8615	23.7541	24.1892
PPI1_ARATH	sp|O23144|PPI1_ARATH Proton pump-interactor 1 OS=Arabidopsis thaliana OX=3702 GN=PPI1 PE=1 SV=2	PPI1	68879	26	54.41	26	0.509168	0.0236979	26.3982	26.0722	26.6013	26.9772	26.8473	26.7747
AGP31_ARATH	sp|Q9FZA2|AGP31_ARATH Non-classical arabinogalactan protein 31 OS=Arabidopsis thaliana OX=3702 GN=AGP31 PE=1 SV=1	AGP31	38489	8	19.78	8	0.508662	0.0161158	28.0415	27.7266	27.5631	28.3145	28.2508	28.2919
RS121_ARATH	sp|Q9S9P1|RS121_ARATH 40S ribosomal protein S12-1 OS=Arabidopsis thaliana OX=3702 GN=RPS12A PE=2 SV=1	RPS12A	15377	6	48.61	6	0.507516	0.0222973	27.3111	26.8929	27.2365	27.5053	27.6249	27.8329
PSD8A_ARATH	sp|Q9SGW3|PSD8A_ARATH 26S proteasome non-ATPase regulatory subunit 8 homolog A OS=Arabidopsis thaliana OX=3702 GN=RPN12A PE=1 SV=1	RPN12A	30706	20	75.66	18	0.505076	0.00477196	27.3732	27.3695	27.3963	27.8821	28.0162	27.7559
SRP14_ARATH	sp|O04421|SRP14_ARATH Signal recognition particle 14 kDa protein OS=Arabidopsis thaliana OX=3702 GN=SRP14 PE=2 SV=2	SRP14	13781	2	17.36	2	0.504903	0.192058	22.7561	22.1379	23.2665	23.404	23.4845	22.7866
SSL4_ARATH	sp|Q9SD07|SSL4_ARATH Protein STRICTOSIDINE SYNTHASE-LIKE 4 OS=Arabidopsis thaliana OX=3702 GN=SSL4 PE=1 SV=1	SSL4	41596	4	18.11	3	0.503426	0.0324385	22.4318	22.8798	22.7937	22.9847	23.2275	23.4034
UFL1_ARATH	sp|Q9LX73|UFL1_ARATH E3 UFM1-protein ligase 1 homolog OS=Arabidopsis thaliana OX=3702 GN=At3g46220 PE=1 SV=1	At3g46220	89073	13	21.14	12	0.503221	0.0617923	23.9399	24.4325	24.2215	25.0594	24.6134	24.4307
FAO4B_ARATH	sp|Q94BP3|FAO4B_ARATH Long-chain-alcohol oxidase FAO4B OS=Arabidopsis thaliana OX=3702 GN=FAO4B PE=2 SV=2	FAO4B	81959	3	3.61	2	0.501176	0.345947	21.3594	21.544	21.754	22.8532	20.9672	22.3406
RS162_ARATH	sp|Q9M8X9|RS162_ARATH 40S ribosomal protein S16-2 OS=Arabidopsis thaliana OX=3702 GN=RPS16B PE=1 SV=1	RPS16B	16586	7	34.93	2	0.500641	0.00685507	26.8078	26.9929	27.1154	27.4569	27.4427	27.5184
G3PP1_ARATH	sp|Q9SAJ6|G3PP1_ARATH Glyceraldehyde-3-phosphate dehydrogenase GAPCP1, chloroplastic OS=Arabidopsis thaliana OX=3702 GN=GAPCP1 PE=1 SV=1	GAPCP1	44831	16	44.55	11	0.500208	0.00749601	25.749	25.7624	25.9393	26.3971	26.1675	26.3867
AK1_ARATH	sp|Q9LYU8|AK1_ARATH Aspartokinase 1, chloroplastic OS=Arabidopsis thaliana OX=3702 GN=AK1 PE=1 SV=1	AK1	62298	7	14.24	5	0.499933	0.0771879	22.6324	22.7025	22.9758	23.3182	23.6467	22.8456
GGP3_ARATH	sp|Q9M0A5|GGP3_ARATH Gamma-glutamyl peptidase 3 OS=Arabidopsis thaliana OX=3702 GN=GGP3 PE=1 SV=1	GGP3	28225	3	15.26	2	0.49933	0.165751	21.3146	21.9162	21.4484	22.1771	22.5277	21.4724
A0A142I795_ARATH	tr|A0A142I795|A0A142I795_ARATH Ribulose bisphosphate carboxylase large chain (Fragment) OS=Arabidopsis thaliana OX=3702 GN=rbcL PE=3 SV=1	rbcL	51866	83	89.13	2	0.499054	0.0451526	23.7803	24.1479	24.3263	24.8318	24.4026	24.5174
TRXB2_ARATH	sp|Q39242|TRXB2_ARATH Thioredoxin reductase 2 OS=Arabidopsis thaliana OX=3702 GN=NTR2 PE=2 SV=2	NTR2	40635	19	67.36	17	0.497034	0.0473249	27.4643	26.9832	27.6887	27.8899	27.8812	27.8561
LIP5_ARATH	sp|Q9SZ15|LIP5_ARATH Protein HOMOLOG OF MAMMALIAN LYST-INTERACTING PROTEIN 5 OS=Arabidopsis thaliana OX=3702 GN=LIP5 PE=1 SV=1	LIP5	46218	3	13.3	1	0.496529	0.210774	21.2775	22.3432	22.4384	22.6785	22.1847	22.6854
A0A178VQQ0_ARATH	tr|A0A178VQQ0|A0A178VQQ0_ARATH Signal recognition particle receptor subunit beta OS=Arabidopsis thaliana OX=3702 GN=At2g18770 PE=3 SV=1	At2g18770	28973	6	33.46	4	0.49626	0.14879	23.6874	23.36	23.1335	24.3163	23.3158	24.0375
VDAC1_ARATH	sp|Q9SRH5|VDAC1_ARATH Mitochondrial outer membrane protein porin 1 OS=Arabidopsis thaliana OX=3702 GN=VDAC1 PE=1 SV=3	VDAC1	29425	25	77.54	23	0.495661	0.0061313	29.4546	29.5007	29.5548	29.9414	29.9002	30.1555
A0A5S9YBP6_ARATH	tr|A0A5S9YBP6|A0A5S9YBP6_ARATH Malate dehydrogenase OS=Arabidopsis thaliana OX=3702 GN=C24_LOCUS24361 PE=3 SV=1	C24_LOCUS24361	35663	22	66.87	9	0.494587	0.0113888	25.2312	25.0145	25.1378	25.8023	25.5984	25.4665
RL343_ARATH	sp|Q9LJW6|RL343_ARATH 60S ribosomal protein L34-3 OS=Arabidopsis thaliana OX=3702 GN=RPL34C PE=2 SV=1	RPL34C	13650	4	30.83	2	0.494223	0.168607	22.8414	23.2521	22.5669	23.7514	23.6019	22.7898
RR14_ARATH	sp|P56804|RR14_ARATH 30S ribosomal protein S14, chloroplastic OS=Arabidopsis thaliana OX=3702 GN=rps14 PE=2 SV=2	rps14	11785	3	20	3	0.492813	0.427528	22.9121	23.8428	21.775	23.9238	22.7811	23.3034
BGL25_ARATH	sp|O82772|BGL25_ARATH Probable inactive beta-glucosidase 25 OS=Arabidopsis thaliana OX=3702 GN=BGLU25 PE=2 SV=1	BGLU25	59807	9	26.18	7	0.49217	0.0725593	24.5826	23.9316	24.632	25.0227	24.8962	24.7038
A0A178WF46_ARATH	tr|A0A178WF46|A0A178WF46_ARATH SAR1 OS=Arabidopsis thaliana OX=3702 GN=At1g33410 PE=4 SV=1	At1g33410	169425	5	5.72	2	0.491797	0.200622	20.6838	21.0704	21.0878	21.9115	21.6945	20.7114
AAT1_ARATH	sp|P46643|AAT1_ARATH Aspartate aminotransferase, mitochondrial OS=Arabidopsis thaliana OX=3702 GN=ASP1 PE=1 SV=1	ASP1	47758	40	80	37	0.491533	0.00556582	28.8996	29.1082	29.1233	29.5103	29.5898	29.5055
PHO32_ARATH	sp|Q8VYN9|PHO32_ARATH Universal stress protein PHOS32 OS=Arabidopsis thaliana OX=3702 GN=PHOS32 PE=1 SV=1	PHOS32	26202	14	73.14	12	0.491349	0.00846541	27.0233	27.2012	27.3624	27.6579	27.6975	27.7055
AP1G2_ARATH	sp|Q9ZUI6|AP1G2_ARATH AP-1 complex subunit gamma-2 OS=Arabidopsis thaliana OX=3702 GN=At1g60070 PE=1 SV=2	At1g60070	94670	18	28.19	14	0.491061	0.003132	25.4472	25.3634	25.305	25.8858	25.8473	25.8556
RL351_ARATH	sp|Q9SF53|RL351_ARATH 60S ribosomal protein L35-1 OS=Arabidopsis thaliana OX=3702 GN=RPL35A PE=2 SV=1	RPL35A	14285	9	49.59	9	0.490264	0.143192	26.648	27.2469	26.1726	27.3144	27.2503	26.9736
CYSD1_ARATH	sp|Q9S6Z7|CYSD1_ARATH Bifunctional L-3-cyanoalanine synthase/cysteine synthase D1 OS=Arabidopsis thaliana OX=3702 GN=CYSD1 PE=1 SV=1	CYSD1	34294	8	43.52	3	0.489684	0.0315727	23.7307	23.8837	24.3031	24.5233	24.4059	24.4573
DABB1_ARATH	sp|Q9SYD8|DABB1_ARATH Stress-response A/B barrel domain-containing protein DABB1 OS=Arabidopsis thaliana OX=3702 GN=DABB1 PE=1 SV=1	DABB1	23652	2	12.86	2	0.489473	0.229194	21.1973	21.8898	21.9201	21.7344	22.8509	21.8903
A0A178UQM0_ARATH	tr|A0A178UQM0|A0A178UQM0_ARATH Uncharacterized protein OS=Arabidopsis thaliana OX=3702 GN=At5g02740 PE=4 SV=1	At5g02740	25224	3	19.3	2	0.488778	0.231142	21.6607	22.5779	22.7858	22.9537	23.1769	22.3602
RS30_ARATH	sp|P49689|RS30_ARATH 40S ribosomal protein S30 OS=Arabidopsis thaliana OX=3702 GN=RPS30A PE=3 SV=3	RPS30A	6887	2	17.74	2	0.488761	0.258604	22.8088	24.131	23.7749	24.5066	23.837	23.8374
A0A178VV92_ARATH	tr|A0A178VV92|A0A178VV92_ARATH EMB2765 OS=Arabidopsis thaliana OX=3702 GN=AXX17_At2g35650 PE=3 SV=1	AXX17_At2g35650	172987	15	13.39	12	0.487785	0.0625648	24.1185	23.9738	24.3692	24.2693	24.7235	24.9321
MSI2_ARATH	sp|O22468|MSI2_ARATH WD-40 repeat-containing protein MSI2 OS=Arabidopsis thaliana OX=3702 GN=MSI2 PE=2 SV=1	MSI2	46704	1	2.65	1	0.486848	0.0495451	20.5608	20.9975	20.5409	20.919	21.4079	21.2328
A0A178UKU6_ARATH	tr|A0A178UKU6|A0A178UKU6_ARATH Peptidase_M48 domain-containing protein OS=Arabidopsis thaliana OX=3702 GN=AXX17_At5g50590 PE=4 SV=1	AXX17_At5g50590	49684	4	15.38	3	0.485489	0.12522	23.65	22.9533	23.7756	24.109	24.111	23.6153
ACLA1_ARATH	sp|Q9SGY2|ACLA1_ARATH ATP-citrate synthase alpha chain protein 1 OS=Arabidopsis thaliana OX=3702 GN=ACLA-1 PE=1 SV=1	ACLA-1	46679	19	50.59	10	0.485339	0.0206876	25.6154	26.0716	25.7143	26.3624	26.2846	26.2104
RS254_ARATH	sp|Q9T029|RS254_ARATH 40S ribosomal protein S25-4 OS=Arabidopsis thaliana OX=3702 GN=RPS25E PE=3 SV=1	RPS25E	12053	7	42.59	7	0.484921	0.021427	26.5754	26.9763	26.6007	27.1572	27.3395	27.1106
A0A178UXZ9_ARATH	tr|A0A178UXZ9|A0A178UXZ9_ARATH Glyco_tran_28_C domain-containing protein OS=Arabidopsis thaliana OX=3702 GN=AXX17_At4g19670 PE=3 SV=1	AXX17_At4g19670	8292	2	34.25	2	0.483704	0.0227652	21.8222	21.9457	21.6544	22.5292	22.1093	22.2349
A0A384KVQ1_ARATH	tr|A0A384KVQ1|A0A384KVQ1_ARATH (thale cress) hypothetical protein OS=Arabidopsis thaliana OX=3702 GN=AXX17_At3g08350 PE=1 SV=1	AXX17_At3g08350	34486	4	17.57	4	0.483525	0.464711	23.2723	21.5527	23.7761	23.3971	23.8234	22.8312
HS905_ARATH	sp|Q9SIF2|HS905_ARATH Heat shock protein 90-5, chloroplastic OS=Arabidopsis thaliana OX=3702 GN=HSP90-5 PE=1 SV=1	HSP90-5	88663	32	59.1	29	0.483477	0.00628576	27.9651	28.2066	28.0995	28.5074	28.6399	28.5743
SSL7_ARATH	sp|Q9SD04|SSL7_ARATH Protein STRICTOSIDINE SYNTHASE-LIKE 7 OS=Arabidopsis thaliana OX=3702 GN=SSL7 PE=2 SV=1	SSL7	41124	2	6.2	1	0.483398	0.485358	21.8633	24.0553	24.1767	23.98	23.5239	24.0416
A0A5S9WS65_ARATH	tr|A0A5S9WS65|A0A5S9WS65_ARATH Uncharacterized protein OS=Arabidopsis thaliana OX=3702 GN=At1g65820 PE=4 SV=1	At1g65820	16586	5	43.15	5	0.482415	0.0197253	25.5013	25.1864	25.2401	25.8739	25.5885	25.9126
A0A178WLH1_ARATH	tr|A0A178WLH1|A0A178WLH1_ARATH Uncharacterized protein OS=Arabidopsis thaliana OX=3702 GN=At1g33230 PE=1 SV=1	At1g33230	40014	1	3.17	1	0.482412	0.141274	21.0948	20.9163	21.6842	21.8894	21.9767	21.2765
Y5659_ARATH	sp|Q9FMD7|Y5659_ARATH Probable inactive receptor kinase At5g16590 OS=Arabidopsis thaliana OX=3702 GN=At5g16590 PE=1 SV=1	At5g16590	67463	21	41.12	19	0.481433	0.00613026	26.4307	26.5078	26.5211	26.8242	27.0333	27.0463
WIT1_ARATH	sp|Q8L7E5|WIT1_ARATH WPP domain-interacting tail-anchored protein 1 OS=Arabidopsis thaliana OX=3702 GN=WIT1 PE=1 SV=2	WIT1	79048	5	9.25	3	0.480078	0.501864	21.3056	21.2099	20.4129	21.8379	22.5102	20.0206
H2A5_ARATH	sp|Q94F49|H2A5_ARATH Probable histone H2A.5 OS=Arabidopsis thaliana OX=3702 GN=At5g27670 PE=1 SV=1	At5g27670	15908	5	38.67	5	0.478419	0.0332002	26.6539	27.2192	26.9133	27.4203	27.4938	27.3074
GAE6_ARATH	sp|Q9LIS3|GAE6_ARATH UDP-glucuronate 4-epimerase 6 OS=Arabidopsis thaliana OX=3702 GN=GAE6 PE=1 SV=1	GAE6	50570	6	20.22	6	0.47821	0.023425	23.3476	23.7744	23.3687	23.9326	23.9084	24.0843
PNSB5_ARATH	sp|Q9FG89|PNSB5_ARATH Photosynthetic NDH subunit of subcomplex B 5, chloroplastic OS=Arabidopsis thaliana OX=3702 GN=PNSB5 PE=2 SV=1	PNSB5	23746	1	8.02	1	0.476691	0.0301129	21.8621	22.0808	21.8057	22.6029	22.1231	22.4527
A0A178WE23_ARATH	tr|A0A178WE23|A0A178WE23_ARATH Thioredoxin-dependent peroxiredoxin OS=Arabidopsis thaliana OX=3702 GN=AXX17_At1g22400 PE=4 SV=1	AXX17_At1g22400	28090	3	22.22	3	0.476616	0.25666	21.8699	22.8029	22.0856	22.2269	22.5913	23.37
SEBP2_ARATH	sp|Q93WN0|SEBP2_ARATH Selenium-binding protein 2 OS=Arabidopsis thaliana OX=3702 GN=SBP2 PE=1 SV=1	SBP2	53937	34	82.75	34	0.47577	0.00516753	29.1748	29.3399	29.3333	29.7664	29.8166	29.6923
A0A384KE77_ARATH	tr|A0A384KE77|A0A384KE77_ARATH Diphthine--ammonia ligase OS=Arabidopsis thaliana OX=3702 GN=AXX17_At3g03900 PE=4 SV=1	AXX17_At3g03900	79899	4	5.71	4	0.471529	0.333288	21.9616	22.04	22.1436	22.8315	21.5037	23.2246
FPP7_ARATH	sp|Q9SLN1|FPP7_ARATH Filament-like plant protein 7 OS=Arabidopsis thaliana OX=3702 GN=FPP7 PE=3 SV=2	FPP7	101423	2	2.56	1	0.47085	0.0740692	24.775	25.2912	24.7504	25.7146	25.2531	25.2615
AP1S1_ARATH	sp|Q8LEZ8|AP1S1_ARATH AP-1 complex subunit sigma-1 OS=Arabidopsis thaliana OX=3702 GN=AAP19-1 PE=1 SV=1	AAP19-1	18759	5	34.16	4	0.469878	0.140139	23.2717	24.1886	24.1305	24.4043	24.4386	24.1576
LRK41_ARATH	sp|O80939|LRK41_ARATH L-type lectin-domain containing receptor kinase IV.1 OS=Arabidopsis thaliana OX=3702 GN=LECRK41 PE=2 SV=1	LECRK41	75541	14	25.78	13	0.469804	0.00851001	25.884	25.6277	25.6331	26.1971	26.1318	26.2253
AMI1_ARATH	sp|Q9FR37|AMI1_ARATH Amidase 1 OS=Arabidopsis thaliana OX=3702 GN=AMI1 PE=1 SV=1	AMI1	45056	12	49.41	9	0.469786	0.113667	24.7487	25.0241	24.2239	24.8293	25.2942	25.2825
BUB31_ARATH	sp|Q9LJN8|BUB31_ARATH Mitotic checkpoint protein BUB3.1 OS=Arabidopsis thaliana OX=3702 GN=BUB3.1 PE=1 SV=1	BUB3.1	37874	1	4.12	1	0.469098	0.0866368	20.6858	21.2352	20.9209	21.7856	21.3114	21.1522
GLYM2_ARATH	sp|Q94C74|GLYM2_ARATH Serine hydroxymethyltransferase 2, mitochondrial OS=Arabidopsis thaliana OX=3702 GN=SHM2 PE=1 SV=2	SHM2	57342	42	76.21	19	0.468418	0.00951752	27.3785	27.6786	27.621	28.0029	28.0118	28.0686
A0A178VET0_ARATH	tr|A0A178VET0|A0A178VET0_ARATH Phosphoenolpyruvate carboxylase OS=Arabidopsis thaliana OX=3702 GN=AXX17_At3g15580 PE=3 SV=1	AXX17_At3g15580	110229	55	47.21	5	0.467812	0.237471	23.1857	22.4272	22.9295	22.6302	23.5955	23.7202
GSTF8_ARATH	sp|Q96266|GSTF8_ARATH Glutathione S-transferase F8, chloroplastic OS=Arabidopsis thaliana OX=3702 GN=GSTF8 PE=1 SV=3	GSTF8	29232	21	71.48	19	0.467107	0.00564783	29.212	29.2143	29.0632	29.7108	29.5701	29.61
HINT1_ARATH	sp|Q8GUN2|HINT1_ARATH Adenylylsulfatase HINT1 OS=Arabidopsis thaliana OX=3702 GN=HINT1 PE=1 SV=1	HINT1	16000	8	70.07	7	0.464602	0.0777031	25.8857	25.6997	26.2689	26.0929	26.5373	26.618
R27A2_ARATH	sp|Q9LR33|R27A2_ARATH 60S ribosomal protein L27a-2 OS=Arabidopsis thaliana OX=3702 GN=RPL27AB PE=2 SV=1	RPL27AB	16292	10	52.74	1	0.464288	0.0755438	24.9215	25.0726	24.4841	25.2345	25.0647	25.5719
FPPS2_ARATH	sp|Q43315|FPPS2_ARATH Farnesyl pyrophosphate synthase 2 OS=Arabidopsis thaliana OX=3702 GN=FPS2 PE=2 SV=1	FPS2	39826	8	27.49	3	0.464281	0.0385331	23.8243	23.5515	23.3154	23.8421	24.1562	24.0857
GSA1_ARATH	sp|P42799|GSA1_ARATH Glutamate-1-semialdehyde 2,1-aminomutase 1, chloroplastic OS=Arabidopsis thaliana OX=3702 GN=GSA1 PE=1 SV=1	GSA1	50370	27	68.35	26	0.463916	0.00601535	28.2185	28.2022	28.1223	28.7482	28.6465	28.5401
A0A7G2ECL1_ARATH	tr|A0A7G2ECL1|A0A7G2ECL1_ARATH Acetohydroxy-acid synthase small subunit OS=Arabidopsis thaliana OX=3702 GN=AT9943_LOCUS8225 PE=3 SV=1	AT9943_LOCUS8225	53873	20	54.38	19	0.463729	0.0178784	25.7647	25.9449	25.6783	26.4279	26.0851	26.2661
A0A178VX82_ARATH	tr|A0A178VX82|A0A178VX82_ARATH Pyruvate kinase OS=Arabidopsis thaliana OX=3702 GN=AXX17_At2g33300 PE=1 SV=1	AXX17_At2g33300	57508	31	63.57	9	0.46318	0.054617	25.4932	25.8048	25.3757	25.7186	26.1116	26.2331
BRT1_ARATH	sp|Q9SUV1|BRT1_ARATH Adenine nucleotide transporter BT1, chloroplastic/mitochondrial OS=Arabidopsis thaliana OX=3702 GN=BT1 PE=1 SV=1	BT1	42571	3	11.48	2	0.463052	0.210816	21.5385	22.0298	22.6845	22.209	22.6083	22.8247
A0A384KII3_ARATH	tr|A0A384KII3|A0A384KII3_ARATH Pyruvate kinase OS=Arabidopsis thaliana OX=3702 GN=AXX17_At5g63250 PE=3 SV=1	AXX17_At5g63250	55018	25	62.94	19	0.461687	0.0162117	26.6356	26.9814	26.669	27.1924	27.3166	27.1621
RL38_ARATH	sp|O22860|RL38_ARATH 60S ribosomal protein L38 OS=Arabidopsis thaliana OX=3702 GN=RPL38A PE=3 SV=1	RPL38A	8122	5	63.77	5	0.461207	0.0666909	26.6552	26.5658	27.1653	27.3887	27.3458	27.0354
AIR12_ARATH	sp|Q94BT2|AIR12_ARATH Auxin-induced in root cultures protein 12 OS=Arabidopsis thaliana OX=3702 GN=AIR12 PE=1 SV=3	AIR12	25592	3	11.11	3	0.45862	0.546615	22.7111	23.2105	21.9064	24.5911	22.2745	22.3382
RL302_ARATH	sp|Q8VZ19|RL302_ARATH 60S ribosomal protein L30-2 OS=Arabidopsis thaliana OX=3702 GN=RPL30B PE=3 SV=1	RPL30B	12290	9	62.5	3	0.457875	0.0538389	24.4936	24.319	24.8278	25.1523	24.7485	25.1133
NHP2_ARATH	sp|Q9LEY9|NHP2_ARATH H/ACA ribonucleoprotein complex subunit 2-like protein OS=Arabidopsis thaliana OX=3702 GN=At5g08180 PE=1 SV=1	At5g08180	16948	3	28.85	3	0.457383	0.00862307	24.1182	24.2473	23.9718	24.5462	24.6198	24.5435
VPS51_ARATH	sp|Q0WQ75|VPS51_ARATH Vacuolar protein sorting-associated protein 51 homolog OS=Arabidopsis thaliana OX=3702 GN=VPS51 PE=1 SV=1	VPS51	88516	11	17.69	7	0.455987	0.24934	23.4964	23.8478	23.6584	24.7369	23.3755	24.2582
FBL39_ARATH	sp|Q0WR05|FBL39_ARATH F-box/LRR-repeat protein At2g42730 OS=Arabidopsis thaliana OX=3702 GN=At2g42730 PE=2 SV=1	At2g42730	51587	2	3.28	2	0.455814	0.237982	21.7089	21.3686	22.6535	22.4405	22.1523	22.5057
R13A1_ARATH	sp|Q9SFU1|R13A1_ARATH 60S ribosomal protein L13a-1 OS=Arabidopsis thaliana OX=3702 GN=RPL13AA PE=2 SV=1	RPL13AA	23466	14	54.85	9	0.452921	0.0259768	26.8931	27.0111	27.2807	27.3942	27.4694	27.68
TPS1L_ARATH	sp|Q5M731|TPS1L_ARATH Thiamine biosynthetic bifunctional enzyme TH1, chloroplastic OS=Arabidopsis thaliana OX=3702 GN=TH1 PE=1 SV=1	TH1	55813	9	31.03	7	0.452667	0.270458	24.3489	24.1182	23.415	23.7611	24.7154	24.7636
HIR4_ARATH	sp|Q9FHM7|HIR4_ARATH Hypersensitive-induced response protein 4 OS=Arabidopsis thaliana OX=3702 GN=HIR4 PE=1 SV=1	HIR4	32378	15	62.33	11	0.452194	0.121414	24.8269	24.3821	25.0155	25.4369	24.791	25.3531
PCS1_ARATH	sp|Q9S7Z3|PCS1_ARATH Glutathione gamma-glutamylcysteinyltransferase 1 OS=Arabidopsis thaliana OX=3702 GN=PCS1 PE=1 SV=1	PCS1	54475	24	56.08	21	0.451652	0.0579918	26.6402	26.036	26.5925	26.784	26.8977	26.9419
PDI22_ARATH	sp|Q9MAU6|PDI22_ARATH Protein disulfide-isomerase like 2-2 OS=Arabidopsis thaliana OX=3702 GN=PDIL2-2 PE=2 SV=2	PDIL2-2	48403	5	15.21	1	0.451609	0.252224	21.4885	20.4413	20.5798	20.804	21.4561	21.6044
BCAT4_ARATH	sp|Q9LE06|BCAT4_ARATH Methionine aminotransferase BCAT4 OS=Arabidopsis thaliana OX=3702 GN=BCAT4 PE=1 SV=1	BCAT4	39019	37	77.4	36	0.451192	0.0675876	28.5271	29.0571	29.2188	29.4633	29.3378	29.3554
BIG5_ARATH	sp|F4IXW2|BIG5_ARATH Brefeldin A-inhibited guanine nucleotide-exchange protein 5 OS=Arabidopsis thaliana OX=3702 GN=BIG5 PE=1 SV=2	BIG5	192883	71	51.01	65	0.450511	0.00867697	27.9158	27.8926	28.1403	28.4536	28.4074	28.4393
TCPA_ARATH	sp|P28769|TCPA_ARATH T-complex protein 1 subunit alpha OS=Arabidopsis thaliana OX=3702 GN=CCT1 PE=1 SV=1	CCT1	59229	39	73.94	38	0.449613	0.00832269	28.2425	28.3728	28.4553	28.8853	28.8094	28.7248
PSAG_ARATH	sp|Q9S7N7|PSAG_ARATH Photosystem I reaction center subunit V, chloroplastic OS=Arabidopsis thaliana OX=3702 GN=PSAG PE=1 SV=1	PSAG	17085	5	21.88	5	0.449467	0.077009	26.0821	25.4264	25.9104	26.4701	26.1469	26.1502
RIBA2_ARATH	sp|Q6NLQ7|RIBA2_ARATH Monofunctional riboflavin biosynthesis protein RIBA 2, chloroplastic OS=Arabidopsis thaliana OX=3702 GN=RIBA2 PE=1 SV=1	RIBA2	52200	3	7.35	2	0.448332	0.159068	21.7418	21.7651	22.4198	22.7396	22.5311	22.0011
A0A5S9X407_ARATH	tr|A0A5S9X407|A0A5S9X407_ARATH Uncharacterized protein OS=Arabidopsis thaliana OX=3702 GN=C24_LOCUS9685 PE=3 SV=1	C24_LOCUS9685	61617	25	54.97	20	0.447705	0.0331678	26.2254	26.3954	26.1816	26.6304	26.9918	26.5233
TBB7_ARATH	sp|P29515|TBB7_ARATH Tubulin beta-7 chain OS=Arabidopsis thaliana OX=3702 GN=TUBB7 PE=2 SV=1	TUBB7	50747	63	83.07	5	0.447559	0.0198093	26.2104	26.4166	26.443	26.6347	26.7969	26.9811
A0A178V065_ARATH	tr|A0A178V065|A0A178V065_ARATH Uncharacterized protein OS=Arabidopsis thaliana OX=3702 GN=AXX17_At4g10790 PE=3 SV=1	AXX17_At4g10790	23699	3	17.62	2	0.44735	0.153774	21.4849	21.1725	21.6458	21.435	21.8329	22.3773
FTRC_ARATH	sp|Q9SJ89|FTRC_ARATH Ferredoxin-thioredoxin reductase catalytic chain, chloroplastic OS=Arabidopsis thaliana OX=3702 GN=FTRC PE=1 SV=1	FTRC	16434	5	39.73	4	0.446085	0.0620225	23.5647	24.0009	24.252	24.3825	24.3491	24.4242
A0A178VVT9_ARATH	tr|A0A178VVT9|A0A178VVT9_ARATH CTF2B OS=Arabidopsis thaliana OX=3702 GN=AXX17_At2g25800 PE=3 SV=1	AXX17_At2g25800	47178	16	43.22	12	0.445127	0.00992438	25.3187	25.2353	25.5109	25.8214	25.755	25.8238
FBL74_ARATH	sp|Q94B46|FBL74_ARATH F-box/LRR-repeat protein At4g14096 OS=Arabidopsis thaliana OX=3702 GN=At4g14096 PE=2 SV=1	At4g14096	52873	1	3.42	1	0.445049	0.280093	19.9761	21.1744	20.6741	21.5682	20.7544	20.8372
RHIP1_ARATH	sp|Q84K90|RHIP1_ARATH RGS1-HXK1-interacting protein 1 OS=Arabidopsis thaliana OX=3702 GN=RHIP1 PE=1 SV=1	RHIP1	29201	7	29.28	7	0.444381	0.544711	25.7262	24.3114	23.9989	24.4395	26.371	24.5591
DNAT1_ARATH	sp|Q9SX65|DNAT1_ARATH 1,4-dihydroxy-2-naphthoyl-CoA thioesterase 1 OS=Arabidopsis thaliana OX=3702 GN=DHNAT1 PE=1 SV=1	DHNAT1	16713	5	57.05	3	0.443845	0.00851514	22.6694	22.7595	22.7953	23.3007	23.0736	23.1814
MPK6_ARATH	sp|Q39026|MPK6_ARATH Mitogen-activated protein kinase 6 OS=Arabidopsis thaliana OX=3702 GN=MPK6 PE=1 SV=1	MPK6	45058	16	61.52	15	0.443646	0.0112019	26.6871	26.7698	26.6805	27.0275	27.122	27.3188
ATPO_ARATH	sp|Q96251|ATPO_ARATH ATP synthase subunit O, mitochondrial OS=Arabidopsis thaliana OX=3702 GN=At5g13450 PE=1 SV=2	At5g13450	26322	24	72.69	23	0.443154	0.00492867	28.4809	28.5309	28.586	28.9953	29.0101	28.9218
VP26A_ARATH	sp|Q9FJD0|VP26A_ARATH Vacuolar protein sorting-associated protein 26A OS=Arabidopsis thaliana OX=3702 GN=VPS26A PE=2 SV=1	VPS26A	35150	13	47.35	3	0.443089	0.192944	23.8437	24.6143	24.6734	24.9982	24.3947	25.0678
PINI_ARATH	sp|Q9C6B8|PINI_ARATH Auxin efflux carrier component 1 OS=Arabidopsis thaliana OX=3702 GN=PIN1 PE=1 SV=1	PIN1	67019	2	5.95	1	0.442962	0.00751641	21.0582	21.1139	21.1061	21.4045	21.5966	21.606
KASC1_ARATH	sp|P52410|KASC1_ARATH 3-oxoacyl-[acyl-carrier-protein] synthase I, chloroplastic OS=Arabidopsis thaliana OX=3702 GN=KAS1 PE=1 SV=2	KAS1	50413	40	70.19	39	0.442704	0.00395065	29.111	29.0616	29.0595	29.5223	29.5307	29.5072
U76C1_ARATH	sp|Q9FI99|U76C1_ARATH UDP-glycosyltransferase 76C1 OS=Arabidopsis thaliana OX=3702 GN=UGT76C1 PE=1 SV=1	UGT76C1	52360	5	15.09	5	0.441872	0.343738	22.0091	21.917	23.2469	22.4111	23.3049	22.7827
IF4E1_ARATH	sp|O23252|IF4E1_ARATH Eukaryotic translation initiation factor 4E-1 OS=Arabidopsis thaliana OX=3702 GN=EIF4E1 PE=1 SV=1	EIF4E1	26519	3	13.19	3	0.441266	0.126018	23.5425	23.6814	22.9837	24.133	23.5409	23.8575
HRD11_ARATH	sp|Q9SLJ2|HRD11_ARATH Dehydrin HIRD11 OS=Arabidopsis thaliana OX=3702 GN=HIRD11 PE=1 SV=1	HIRD11	10796	1	12.24	1	0.441017	0.0710715	21.6297	22.252	22.0896	22.6282	22.3487	22.3175
TXND9_ARATH	sp|O64628|TXND9_ARATH Thioredoxin domain-containing protein 9 homolog OS=Arabidopsis thaliana OX=3702 GN=At2g18990 PE=2 SV=1	At2g18990	24451	4	29.86	2	0.44055	0.220752	21.7656	22.3154	21.7489	21.7498	22.7032	22.6986
JAL30_ARATH	sp|O04314|JAL30_ARATH PYK10-binding protein 1 OS=Arabidopsis thaliana OX=3702 GN=PBP1 PE=1 SV=1	PBP1	32158	14	73.49	13	0.439665	0.0466831	26.4543	26.8982	26.7515	26.9486	27.3538	27.1206
PSBH_ARATH	sp|P56780|PSBH_ARATH Photosystem II reaction center protein H OS=Arabidopsis thaliana OX=3702 GN=psbH PE=1 SV=2	psbH	7702	2	28.77	2	0.439595	0.0110474	26.7213	26.8488	26.847	27.1594	27.178	27.3984
MTND3_ARATH	sp|Q8W108|MTND3_ARATH Acireductone dioxygenase 3 OS=Arabidopsis thaliana OX=3702 GN=ARD3 PE=1 SV=1	ARD3	23356	12	64.32	12	0.439002	0.0134093	26.7438	26.662	26.9569	27.2704	27.269	27.1403
GL31_ARATH	sp|P94040|GL31_ARATH Germin-like protein subfamily 3 member 1 OS=Arabidopsis thaliana OX=3702 GN=GLP1 PE=1 SV=1	GLP1	21559	5	40.87	3	0.43895	0.0831153	27.7154	27.5811	27.2254	27.6594	27.9306	28.2488
GSTUH_ARATH	sp|Q9FUS8|GSTUH_ARATH Glutathione S-transferase U17 OS=Arabidopsis thaliana OX=3702 GN=GSTU17 PE=2 SV=1	GSTU17	25307	1	6.17	1	0.438657	0.225679	20.6279	21.8174	21.3672	21.4905	21.6932	21.9447
AGD5_ARATH	sp|Q9FL69|AGD5_ARATH ADP-ribosylation factor GTPase-activating protein AGD5 OS=Arabidopsis thaliana OX=3702 GN=AGD5 PE=1 SV=1	AGD5	52593	7	20.29	6	0.438516	0.222037	23.1982	24.2027	24.3419	24.4679	24.2259	24.3646
A0A178UQI3_ARATH	tr|A0A178UQI3|A0A178UQI3_ARATH Uncharacterized protein OS=Arabidopsis thaliana OX=3702 GN=At5g54560 PE=4 SV=1	At5g54560	40036	1	1.67	1	0.438414	0.0290034	24.5734	24.3389	24.8073	24.9225	25.062	25.0504
HMGB3_ARATH	sp|P93047|HMGB3_ARATH High mobility group B protein 3 OS=Arabidopsis thaliana OX=3702 GN=HMGB3 PE=1 SV=1	HMGB3	15681	2	19.15	2	0.438	0.65921	23.0957	23.3649	21.2527	24.4274	23.2809	21.3191
VSR4_ARATH	sp|Q56ZQ3|VSR4_ARATH Vacuolar-sorting receptor 4 OS=Arabidopsis thaliana OX=3702 GN=VSR4 PE=2 SV=2	VSR4	69812	23	49.84	20	0.437083	0.0176753	26.806	26.6341	26.5167	26.9982	27.0328	27.2371
RK121_ARATH	sp|P36210|RK121_ARATH 50S ribosomal protein L12-1, chloroplastic OS=Arabidopsis thaliana OX=3702 GN=RPL12A PE=2 SV=1	RPL12A	20075	4	23.04	4	0.436107	0.276969	24.8211	25.8401	26.0496	26.3126	25.6848	26.0218
TIR_ARATH	sp|Q9SSN3|TIR_ARATH Toll/interleukin-1 receptor-like protein OS=Arabidopsis thaliana OX=3702 GN=TIR PE=1 SV=1	TIR	20245	7	34.66	7	0.434881	0.15437	24.0267	24.4013	23.7856	24.4186	24.9537	24.1459
PFPB2_ARATH	sp|F4JGR5|PFPB2_ARATH Pyrophosphate--fructose 6-phosphate 1-phosphotransferase subunit beta 2 OS=Arabidopsis thaliana OX=3702 GN=PFP-BETA2 PE=3 SV=1	PFP-BETA2	62742	18	34.97	9	0.434008	0.0456467	24.7433	24.479	25.0225	25.0492	25.2668	25.2308
A0A654FWT3_ARATH	tr|A0A654FWT3|A0A654FWT3_ARATH Uncharacterized protein OS=Arabidopsis thaliana OX=3702 GN=AN1_LOCUS20582 PE=4 SV=1	AN1_LOCUS20582	18781	3	27.17	2	0.433737	0.0594509	23.6067	24.1674	23.6579	24.192	24.164	24.3772
SCAM4_ARATH	sp|Q9C6X2|SCAM4_ARATH Secretory carrier-associated membrane protein 4 OS=Arabidopsis thaliana OX=3702 GN=SCAMP4 PE=1 SV=1	SCAMP4	30060	5	32.95	3	0.433719	0.0536735	23.6731	23.523	23.6435	23.788	24.3855	23.9673
PDI13_ARATH	sp|Q8VX13|PDI13_ARATH Protein disulfide isomerase-like 1-3 OS=Arabidopsis thaliana OX=3702 GN=PDIL1-3 PE=2 SV=1	PDIL1-3	64212	21	44.39	16	0.433157	0.0167918	26.5462	26.4553	26.5083	27.1446	26.8292	26.8355
A0A1I9LQB3_ARATH	tr|A0A1I9LQB3|A0A1I9LQB3_ARATH Carbonic anhydrase OS=Arabidopsis thaliana OX=3702 GN=CA1 PE=1 SV=1	CA1	28198	34	94.59	2	0.432212	0.109701	23.9469	23.5624	23.4416	23.7268	24.11	24.4107
RAD2A_ARATH	sp|P28188|RAD2A_ARATH Ras-related protein RABD2a OS=Arabidopsis thaliana OX=3702 GN=RABD2A PE=1 SV=3	RABD2A	22648	11	68.47	11	0.432144	0.0216068	28.0302	27.8569	27.7026	28.4429	28.1906	28.2526
MSI1_ARATH	sp|O22467|MSI1_ARATH Histone-binding protein MSI1 OS=Arabidopsis thaliana OX=3702 GN=MSI1 PE=1 SV=1	MSI1	48195	4	13.44	4	0.432028	0.0166251	23.4938	23.4759	23.2567	23.7669	23.9888	23.7667
OP24B_ARATH	sp|Q8H0Y1|OP24B_ARATH Outer envelope pore protein 24B, chloroplastic OS=Arabidopsis thaliana OX=3702 GN=OEP24B PE=2 SV=1	OEP24B	23411	11	52.58	11	0.431152	0.017544	26.2734	26.194	26.0392	26.4399	26.6342	26.7259
MTV1_ARATH	sp|Q9C5H4|MTV1_ARATH Protein MODIFIED TRANSPORT TO THE VACUOLE 1 OS=Arabidopsis thaliana OX=3702 GN=MTV1 PE=1 SV=1	MTV1	74892	9	18.26	8	0.430966	0.0594416	23.8286	24.0315	24.275	24.4757	24.7163	24.2359
A0A178UAX4_ARATH	tr|A0A178UAX4|A0A178UAX4_ARATH Uncharacterized protein OS=Arabidopsis thaliana OX=3702 GN=AXX17_At5g11430 PE=4 SV=1	AXX17_At5g11430	156499	4	3.85	3	0.43093	0.460409	22.3976	20.286	21.8603	22.1634	21.885	21.7883
BRN1L_ARATH	sp|Q8LFS6|BRN1L_ARATH RNA-binding protein BRN1 OS=Arabidopsis thaliana OX=3702 GN=BRN1 PE=2 SV=1	BRN1	48199	3	7.26	3	0.430551	0.279755	21.669	21.4223	21.4252	21.2511	22.6677	21.8894
Y2245_ARATH	sp|Q8S8L9|Y2245_ARATH Uncharacterized TPR repeat-containing protein At2g32450 OS=Arabidopsis thaliana OX=3702 GN=At2g32450 PE=1 SV=1	At2g32450	90229	12	21.82	3	0.430179	0.385312	22.0738	22.2491	20.6	22.274	21.8476	22.0919
RS61_ARATH	sp|O48549|RS61_ARATH 40S ribosomal protein S6-1 OS=Arabidopsis thaliana OX=3702 GN=RPS6A PE=1 SV=2	RPS6A	28367	18	49.2	7	0.430107	0.0180551	27.2495	27.4071	27.342	27.9538	27.6162	27.7189
NAGLU_ARATH	sp|Q9FNA3|NAGLU_ARATH Alpha-N-acetylglucosaminidase OS=Arabidopsis thaliana OX=3702 GN=NAGLU PE=2 SV=1	NAGLU	92689	9	13.9	8	0.430038	0.0771053	24.2242	23.5958	24.0398	24.2962	24.2711	24.5826
FER3_ARATH	sp|Q9ZQG8|FER3_ARATH Ferredoxin-3, chloroplastic OS=Arabidopsis thaliana OX=3702 GN=FD3 PE=1 SV=1	FD3	16634	2	36.13	2	0.429334	0.370765	24.0525	22.5415	23.7062	23.6443	23.5937	24.3501
HLB1_ARATH	sp|Q9FHY8|HLB1_ARATH Protein HLB1 OS=Arabidopsis thaliana OX=3702 GN=HLB1 PE=1 SV=1	HLB1	62398	14	35.4	13	0.428605	0.0069243	26.3216	26.3854	26.4144	26.7093	26.8483	26.8496
FLOT1_ARATH	sp|Q501E6|FLOT1_ARATH Flotillin-like protein 1 OS=Arabidopsis thaliana OX=3702 GN=FLOT1 PE=2 SV=1	FLOT1	52310	6	16.6	5	0.427187	0.224668	24.2559	23.6358	23.4733	23.6808	24.438	24.5278
SMT2_ARATH	sp|Q39227|SMT2_ARATH 24-methylenesterol C-methyltransferase 2 OS=Arabidopsis thaliana OX=3702 GN=SMT2 PE=1 SV=2	SMT2	40450	14	45.98	12	0.426927	0.215791	24.3197	25.5159	24.7795	25.284	25.3691	25.2427
SQD1_ARATH	sp|O48917|SQD1_ARATH UDP-sulfoquinovose synthase, chloroplastic OS=Arabidopsis thaliana OX=3702 GN=SQD1 PE=1 SV=1	SQD1	53114	13	40.88	11	0.426916	0.0665674	25.2335	25.21	25.6621	26.0332	25.5839	25.7693
FRI4_ARATH	sp|Q9S756|FRI4_ARATH Ferritin-4, chloroplastic OS=Arabidopsis thaliana OX=3702 GN=FER4 PE=2 SV=1	FER4	29029	11	56.76	10	0.426467	0.047556	25.6922	25.9446	25.7132	26.252	25.9334	26.444
ACO3M_ARATH	sp|Q9SIB9|ACO3M_ARATH Aconitate hydratase 3, mitochondrial OS=Arabidopsis thaliana OX=3702 GN=ACO3 PE=1 SV=2	ACO3	108201	67	64.95	52	0.426394	0.00483901	29.5685	29.546	29.5842	29.9899	29.9608	30.0271
HMA6_ARATH	sp|Q9SZC9|HMA6_ARATH Copper-transporting ATPase PAA1, chloroplastic OS=Arabidopsis thaliana OX=3702 GN=PAA1 PE=1 SV=1	PAA1	99997	1	2.11	1	0.425731	0.0810933	21.3588	21.5909	21.9643	22.0676	21.8531	22.2704
NADE_ARATH	sp|Q9C723|NADE_ARATH Glutamine-dependent NAD(+) synthetase OS=Arabidopsis thaliana OX=3702 GN=At1g55090 PE=2 SV=1	At1g55090	80900	6	13.52	3	0.425059	0.341207	21.1825	21.1455	21.1503	21.4594	20.8263	22.4678
RL31_ARATH	sp|P17094|RL31_ARATH 60S ribosomal protein L3-1 OS=Arabidopsis thaliana OX=3702 GN=ARP1 PE=1 SV=5	ARP1	44559	43	63.75	42	0.4235	0.0132158	30.3308	30.5646	30.3402	30.8806	30.8808	30.7447
PP2A4_ARATH	sp|P48578|PP2A4_ARATH Serine/threonine-protein phosphatase PP2A-4 catalytic subunit OS=Arabidopsis thaliana OX=3702 GN=PP2A4 PE=1 SV=1	PP2A4	35767	15	60.7	9	0.423024	0.0122077	26.2579	26.1354	26.391	26.6037	26.7237	26.7261
TRPX_ARATH	sp|P32069|TRPX_ARATH Anthranilate synthase alpha subunit 2, chloroplastic OS=Arabidopsis thaliana OX=3702 GN=ASA2 PE=2 SV=1	ASA2	69816	7	15.14	6	0.423018	0.23567	22.569	23.7074	23.4633	23.9074	23.535	23.5663
SMU1_ARATH	sp|Q8W117|SMU1_ARATH Suppressor of mec-8 and unc-52 protein homolog 1 OS=Arabidopsis thaliana OX=3702 GN=SMU1 PE=1 SV=1	SMU1	57724	4	11.35	3	0.422686	0.316013	21.334	21.4428	21.0996	21.7977	22.425	20.9219
A0A178VXZ1_ARATH	tr|A0A178VXZ1|A0A178VXZ1_ARATH Matrin-type domain-containing protein OS=Arabidopsis thaliana OX=3702 GN=AXX17_At2g28950 PE=3 SV=1	AXX17_At2g28950	31370	3	15.88	3	0.422551	0.331287	21.59	22.5136	23.1107	22.6393	22.7412	23.1014
EF1G2_ARATH	sp|Q9FVT2|EF1G2_ARATH Probable elongation factor 1-gamma 2 OS=Arabidopsis thaliana OX=3702 GN=At1g57720 PE=1 SV=1	At1g57720	46400	41	73.61	22	0.42213	0.00676693	28.7504	28.7069	28.8327	29.2305	29.1986	29.1273
RS282_ARATH	sp|P34789|RS282_ARATH 40S ribosomal protein S28-2 OS=Arabidopsis thaliana OX=3702 GN=RPS28C PE=3 SV=1	RPS28C	7341	6	62.5	4	0.421457	0.0478463	24.89	24.4401	24.5284	25.0382	25.2062	24.8785
A0A178WDD9_ARATH	tr|A0A178WDD9|A0A178WDD9_ARATH Uncharacterized protein OS=Arabidopsis thaliana OX=3702 GN=AXX17_At1g40570 PE=4 SV=1	AXX17_At1g40570	27334	1	5.1	1	0.418397	0.13029	21.9258	22.4632	21.6219	22.2574	22.554	22.4547
CAP8_ARATH	sp|Q8LBH2|CAP8_ARATH Putative clathrin assembly protein At2g01600 OS=Arabidopsis thaliana OX=3702 GN=At2g01600 PE=2 SV=2	At2g01600	63629	9	17.69	9	0.41834	0.0907156	24.6588	24.738	25.1504	25.4461	24.9516	25.4045
NU1M_ARATH	sp|P92558|NU1M_ARATH NADH-ubiquinone oxidoreductase chain 1 OS=Arabidopsis thaliana OX=3702 GN=ND1 PE=1 SV=4	ND1	36030	3	12.62	3	0.417785	0.253187	23.5225	23.1065	22.2546	23.354	23.289	23.4939
A0A654FQD0_ARATH	tr|A0A654FQD0|A0A654FQD0_ARATH RRM domain-containing protein OS=Arabidopsis thaliana OX=3702 GN=At4g17720 PE=4 SV=1	At4g17720	33316	13	40.84	12	0.416748	0.00755562	27.3681	27.2903	27.3829	27.7322	27.8486	27.7108
CX5B2_ARATH	sp|Q9SSB8|CX5B2_ARATH Cytochrome c oxidase subunit 5b-2, mitochondrial OS=Arabidopsis thaliana OX=3702 GN=COX5B-2 PE=1 SV=1	COX5B-2	18583	4	39.18	2	0.415353	0.0976626	22.008	22.1729	22.6942	22.6992	22.8659	22.5562
A0A7G2ESI9_ARATH	tr|A0A7G2ESI9|A0A7G2ESI9_ARATH Glutamate-1-semialdehyde 2,1-aminomutase OS=Arabidopsis thaliana OX=3702 GN=AT9943_LOCUS13094 PE=3 SV=1	AT9943_LOCUS13094	101038	26	32.29	10	0.415131	0.252846	24.9983	25.9786	24.9965	25.4069	26.0405	25.7715
CALS9_ARATH	sp|Q9SFU6|CALS9_ARATH Callose synthase 9 OS=Arabidopsis thaliana OX=3702 GN=CALS9 PE=2 SV=2	CALS9	217087	32	23.07	21	0.414875	0.0477581	25.0591	25.5018	25.1111	25.7011	25.4725	25.7431
P4H5_ARATH	sp|Q24JN5|P4H5_ARATH Prolyl 4-hydroxylase 5 OS=Arabidopsis thaliana OX=3702 GN=P4H5 PE=2 SV=1	P4H5	32691	4	26.46	3	0.414596	0.1032	23.2203	22.9188	23.4502	23.2892	23.8767	23.6671
A0A384K9J2_ARATH	tr|A0A384K9J2|A0A384K9J2_ARATH (thale cress) hypothetical protein OS=Arabidopsis thaliana OX=3702 GN=AXX17_At1g30060 PE=4 SV=1	AXX17_At1g30060	38151	3	9.71	2	0.414275	0.38937	21.9993	21.2622	20.3603	22.0275	21.2825	21.5547
APBLA_ARATH	sp|Q9LDK9|APBLA_ARATH Beta-adaptin-like protein A OS=Arabidopsis thaliana OX=3702 GN=BETAA-AD PE=1 SV=1	BETAA-AD	93266	17	30.44	14	0.413239	0.0394262	25.7027	25.7989	25.9945	26.1141	26.4878	26.1339
RPN2_ARATH	sp|Q93Z16|RPN2_ARATH Dolichyl-diphosphooligosaccharide--protein glycosyltransferase subunit 2 OS=Arabidopsis thaliana OX=3702 GN=RPN2 PE=1 SV=1	RPN2	74668	41	55.72	38	0.413207	0.0113281	28.529	28.3209	28.5533	28.8977	28.8715	28.8737
DDI1_ARATH	sp|Q1EBV4|DDI1_ARATH Protein DNA-DAMAGE INDUCIBLE 1 OS=Arabidopsis thaliana OX=3702 GN=DDI1 PE=1 SV=1	DDI1	45359	8	34.3	7	0.412917	0.012486	24.7644	24.9675	24.8141	25.314	25.1594	25.3114
RS29_ARATH	sp|Q680P8|RS29_ARATH 40S ribosomal protein S29 OS=Arabidopsis thaliana OX=3702 GN=RPS29A PE=3 SV=2	RPS29A	6429	4	67.86	4	0.412871	0.019126	24.5102	24.2422	24.5543	24.7772	24.8765	24.8916
A0A384L6I4_ARATH	tr|A0A384L6I4|A0A384L6I4_ARATH (thale cress) hypothetical protein OS=Arabidopsis thaliana OX=3702 GN=At3g21140 PE=4 SV=1	At3g21140	42851	9	27.13	9	0.412478	0.193088	23.9076	24.7931	24.9029	24.9304	24.9953	24.9154
ABA2_ARATH	sp|Q9C826|ABA2_ARATH Xanthoxin dehydrogenase OS=Arabidopsis thaliana OX=3702 GN=ABA2 PE=1 SV=1	ABA2	30272	2	12.98	2	0.412381	0.461538	22.4525	22.1143	21.909	21.3835	23.0775	23.2521
MOR1_ARATH	sp|Q94FN2|MOR1_ARATH Protein MOR1 OS=Arabidopsis thaliana OX=3702 GN=MOR1 PE=1 SV=1	MOR1	217550	10	7.79	7	0.41216	0.497914	22.4113	21.7637	23.2186	22.5487	22.1743	23.907
AGD14_ARATH	sp|Q8RXE7|AGD14_ARATH Probable ADP-ribosylation factor GTPase-activating protein AGD14 OS=Arabidopsis thaliana OX=3702 GN=AGD14 PE=1 SV=2	AGD14	71344	2	6.16	2	0.41185	0.0947585	20.8707	20.5434	21.1607	21.1484	21.1347	21.5271
A0A654FCM5_ARATH	tr|A0A654FCM5|A0A654FCM5_ARATH Uncharacterized protein OS=Arabidopsis thaliana OX=3702 GN=At3g27570 PE=4 SV=1	At3g27570	37147	8	29.12	7	0.409525	0.0210481	24.6977	24.8537	24.4923	25.0405	25.115	25.1168
TDX_ARATH	sp|Q8VWG7|TDX_ARATH TPR repeat-containing thioredoxin TDX OS=Arabidopsis thaliana OX=3702 GN=TDX PE=1 SV=1	TDX	42846	9	31.32	5	0.409405	0.0131334	24.1506	23.9213	23.9487	24.3655	24.3988	24.4844
PSL5_ARATH	sp|Q9FN05|PSL5_ARATH Probable glucan 1,3-alpha-glucosidase OS=Arabidopsis thaliana OX=3702 GN=PSL5 PE=1 SV=1	PSL5	104275	32	49.29	28	0.409065	0.0111909	27.0852	26.9592	26.8873	27.3256	27.3684	27.465
A0A1P8BCG1_ARATH	tr|A0A1P8BCG1|A0A1P8BCG1_ARATH Maf-like protein OS=Arabidopsis thaliana OX=3702 GN=MJB21.15 PE=1 SV=1	MJB21.15	22752	3	19.9	3	0.409053	0.0601592	22.4401	22.9327	22.9316	23.0652	23.297	23.1694
UGDH3_ARATH	sp|Q9LF33|UGDH3_ARATH UDP-glucose 6-dehydrogenase 3 OS=Arabidopsis thaliana OX=3702 GN=UGD3 PE=1 SV=1	UGD3	53117	42	86.04	39	0.408506	0.0164582	29.28	29.3231	29.0377	29.6149	29.579	29.6725
U74C1_ARATH	sp|Q9SKC1|U74C1_ARATH UDP-glycosyltransferase 74C1 OS=Arabidopsis thaliana OX=3702 GN=UGT74C1 PE=2 SV=1	UGT74C1	51632	19	51.42	18	0.40725	0.0602683	26.6507	26.6368	26.7255	27.188	27.3095	26.7373
SRC2_ARATH	sp|O04023|SRC2_ARATH Protein SRC2 homolog OS=Arabidopsis thaliana OX=3702 GN=SRC2 PE=1 SV=1	SRC2	34189	6	20.37	5	0.406643	0.121649	22.9819	23.669	23.1781	23.9357	23.4849	23.6284
CSN4_ARATH	sp|Q8L5U0|CSN4_ARATH COP9 signalosome complex subunit 4 OS=Arabidopsis thaliana OX=3702 GN=CSN4 PE=1 SV=2	CSN4	44957	13	48.11	11	0.406529	0.0174296	25.7697	25.8287	25.6062	26.0114	26.2405	26.1721
STP1_ARATH	sp|P23586|STP1_ARATH Sugar transport protein 1 OS=Arabidopsis thaliana OX=3702 GN=STP1 PE=1 SV=2	STP1	57611	7	14.37	7	0.40537	0.0493785	26.4391	26.1865	26.0471	26.4108	26.7755	26.7025
A0A178VVR9_ARATH	tr|A0A178VVR9|A0A178VVR9_ARATH Uncharacterized protein OS=Arabidopsis thaliana OX=3702 GN=AXX17_At2g15020 PE=3 SV=1	AXX17_At2g15020	13833	3	24.59	3	0.404439	0.0162174	23.8628	23.6484	23.7208	24.2273	24.1962	24.0218
SSL3_ARATH	sp|Q8VWF6|SSL3_ARATH Protein STRICTOSIDINE SYNTHASE-LIKE 3 OS=Arabidopsis thaliana OX=3702 GN=SSL3 PE=2 SV=1	SSL3	44037	4	15.64	3	0.403656	0.132711	23.1043	22.8977	23.5872	23.6353	23.8371	23.3278
A0A7G2FHM3_ARATH	tr|A0A7G2FHM3|A0A7G2FHM3_ARATH (thale cress) hypothetical protein OS=Arabidopsis thaliana OX=3702 GN=AT9943_LOCUS21047 PE=3 SV=1	AT9943_LOCUS21047	39332	16	51.16	16	0.40343	0.0422373	26.2891	25.9137	26.3902	26.6185	26.6394	26.5453
Q9FVR9_ARATH	tr|Q9FVR9|Q9FVR9_ARATH FAD/NAD(P)-binding oxidoreductase family protein OS=Arabidopsis thaliana OX=3702 GN=At1g57770 PE=1 SV=1	At1g57770	61724	7	16.9	4	0.403014	0.475584	23.2852	21.5815	22.4526	22.0781	23.2462	23.204
A0A5S9X802_ARATH	tr|A0A5S9X802|A0A5S9X802_ARATH Uncharacterized protein OS=Arabidopsis thaliana OX=3702 GN=C24_LOCUS11164 PE=3 SV=1	C24_LOCUS11164	49304	10	25.79	10	0.403014	0.0394734	24.8762	24.9024	24.9795	25.4761	25.4472	25.0438
PSA7A_ARATH	sp|P30186|PSA7A_ARATH Proteasome subunit alpha type-7-A OS=Arabidopsis thaliana OX=3702 GN=PAD1 PE=1 SV=1	PAD1	27337	19	78.8	19	0.402732	0.0249712	28.0286	28.186	28.3127	28.4237	28.682	28.6298
AMPP1_ARATH	sp|F4JQH3|AMPP1_ARATH Aminopeptidase P1 OS=Arabidopsis thaliana OX=3702 GN=APP1 PE=1 SV=1	APP1	71993	23	55.66	21	0.402289	0.0227258	27.0561	26.9586	27.1426	27.2908	27.4566	27.6168
SY132_ARATH	sp|Q8VZU2|SY132_ARATH Syntaxin-132 OS=Arabidopsis thaliana OX=3702 GN=SYP132 PE=1 SV=1	SYP132	34225	10	44.08	9	0.402146	0.17155	26.0975	25.2013	25.9731	26.2281	26.2173	26.0329
NAP1B_ARATH	sp|Q9ZUP3|NAP1B_ARATH Nucleosome assembly protein 1;2 OS=Arabidopsis thaliana OX=3702 GN=NAP1;2 PE=1 SV=1	NAP1;2	43543	7	23.75	7	0.401548	0.566553	23.73	24.6537	23.1061	25.2884	24.3357	23.0704
6PGL1_ARATH	sp|Q9LMX8|6PGL1_ARATH Probable 6-phosphogluconolactonase 1 OS=Arabidopsis thaliana OX=3702 GN=PGL1 PE=2 SV=1	PGL1	29887	2	11.94	2	0.401299	0.225335	21.708	21.6831	21.468	21.3761	22.2484	22.4385
A0A178V2J1_ARATH	tr|A0A178V2J1|A0A178V2J1_ARATH GST C-terminal domain-containing protein OS=Arabidopsis thaliana OX=3702 GN=At4g19880 PE=4 SV=1	At4g19880	37206	15	63.08	15	0.40071	0.00969532	26.7407	26.592	26.6611	27.0715	26.9984	27.1261
A0A654G071_ARATH	tr|A0A654G071|A0A654G071_ARATH ER membrane protein complex subunit 1 OS=Arabidopsis thaliana OX=3702 GN=AN1_LOCUS21953 PE=3 SV=1	AN1_LOCUS21953	108868	32	45.93	29	0.400535	0.0844742	26.5598	27.0452	26.4894	27.0571	26.951	27.2879
A0A178VMS2_ARATH	tr|A0A178VMS2|A0A178VMS2_ARATH Translocation protein SEC62 OS=Arabidopsis thaliana OX=3702 GN=AXX17_At3g22320 PE=3 SV=1	AXX17_At3g22320	41958	3	15.07	3	0.39994	0.272672	21.7801	22.6746	21.5462	22.717	22.2147	22.2691
CTL2_ARATH	sp|Q9LSP9|CTL2_ARATH Chitinase-like protein 2 OS=Arabidopsis thaliana OX=3702 GN=CTL2 PE=2 SV=1	CTL2	36699	2	10.21	2	0.398094	0.380723	21.8594	22.7853	21.2582	22.7269	22.3606	22.0097
TRPB1_ARATH	sp|P14671|TRPB1_ARATH Tryptophan synthase beta chain 1, chloroplastic OS=Arabidopsis thaliana OX=3702 GN=TSB1 PE=2 SV=1	TSB1	50926	23	70.64	21	0.397787	0.0300958	28.0384	28.1763	28.1446	28.6422	28.6229	28.2875
ACBP2_ARATH	sp|Q9STP8|ACBP2_ARATH Acyl-CoA-binding domain-containing protein 2 OS=Arabidopsis thaliana OX=3702 GN=ACBP2 PE=1 SV=1	ACBP2	38480	4	14.41	4	0.397465	0.603612	22.8547	20.7193	23.448	23.1806	22.3936	22.6401
TBCD_ARATH	sp|Q8L5R3|TBCD_ARATH Tubulin-folding cofactor D OS=Arabidopsis thaliana OX=3702 GN=TFCD PE=2 SV=1	TFCD	139916	5	4.86	4	0.397428	0.64981	23.7159	21.2205	20.5129	22.5844	22.0429	22.0143
FTZ21_ARATH	sp|O82533|FTZ21_ARATH Cell division protein FtsZ homolog 2-1, chloroplastic OS=Arabidopsis thaliana OX=3702 GN=FTSZ2-1 PE=1 SV=2	FTSZ2-1	50722	12	33.89	11	0.396845	0.253275	24.2471	24.5349	25.3072	25.069	25.3922	24.8185
QCR9_ARATH	sp|Q9LXJ2|QCR9_ARATH Cytochrome b-c1 complex subunit 9, mitochondrial OS=Arabidopsis thaliana OX=3702 GN=QCR9 PE=1 SV=1	QCR9	8449	2	20.83	2	0.396255	0.0413116	24.4359	24.5865	24.6945	24.8483	25.2099	24.8475
RL281_ARATH	sp|O82204|RL281_ARATH 60S ribosomal protein L28-1 OS=Arabidopsis thaliana OX=3702 GN=RPL28A PE=1 SV=1	RPL28A	15895	9	52.45	9	0.394976	0.037003	28.4226	28.8794	28.6607	29.0962	29.0278	29.0237
U88A1_ARATH	sp|Q9LK73|U88A1_ARATH UDP-glycosyltransferase 88A1 OS=Arabidopsis thaliana OX=3702 GN=UGT88A1 PE=2 SV=1	UGT88A1	51205	14	43.07	14	0.394789	0.115422	25.7034	25.8356	25.1158	25.8295	25.9845	26.0251
STR14_ARATH	sp|Q94A65|STR14_ARATH Rhodanese-like domain-containing protein 14, chloroplastic OS=Arabidopsis thaliana OX=3702 GN=At4g27700 PE=2 SV=1	At4g27700	24872	13	61.61	13	0.393167	0.0137959	26.7883	26.976	26.7588	27.1789	27.2708	27.2529
THO4A_ARATH	sp|Q8L773|THO4A_ARATH THO complex subunit 4A OS=Arabidopsis thaliana OX=3702 GN=ALY1 PE=1 SV=1	ALY1	25755	6	34.43	5	0.392699	0.438413	24.3187	24.2888	22.7332	24.4523	24.2352	23.8315
NDUS1_ARATH	sp|Q9FGI6|NDUS1_ARATH NADH dehydrogenase [ubiquinone] iron-sulfur protein 1, mitochondrial OS=Arabidopsis thaliana OX=3702 GN=EMB1467 PE=1 SV=2	EMB1467	81525	35	56.42	35	0.391703	0.0427506	28.4105	28.5015	28.7208	28.7266	29.0846	28.9966
PSA6B_ARATH	sp|O81147|PSA6B_ARATH Proteasome subunit alpha type-6-B OS=Arabidopsis thaliana OX=3702 GN=PAA2 PE=1 SV=1	PAA2	27350	24	86.59	22	0.390802	0.140164	27.5466	27.6943	27.5531	27.5059	28.1596	28.3008
A0A178W7U4_ARATH	tr|A0A178W7U4|A0A178W7U4_ARATH Protein transport protein SEC23 OS=Arabidopsis thaliana OX=3702 GN=At1g05520 PE=1 SV=1	At1g05520	86357	13	27.46	10	0.390035	0.485897	24.7192	24.4695	26.023	25.9375	24.6939	25.7503
RAE1D_ARATH	sp|Q9LZD4|RAE1D_ARATH Ras-related protein RABE1d OS=Arabidopsis thaliana OX=3702 GN=RABE1D PE=1 SV=1	RABE1D	24037	10	48.15	8	0.388952	0.0424215	26.5699	26.891	26.5082	26.917	27.0474	27.1715
UGPA1_ARATH	sp|P57751|UGPA1_ARATH UTP--glucose-1-phosphate uridylyltransferase 1 OS=Arabidopsis thaliana OX=3702 GN=UGP1 PE=2 SV=1	UGP1	51920	36	63.4	11	0.387143	0.0154473	25.6727	25.8554	25.8772	26.268	26.1659	26.1328
A0A178URI9_ARATH	tr|A0A178URI9|A0A178URI9_ARATH Emb1441 OS=Arabidopsis thaliana OX=3702 GN=AXX17_At5g48770 PE=3 SV=1	AXX17_At5g48770	121385	3	4.54	2	0.387075	0.711126	18.0928	21.47	21.6699	21.2045	20.8457	20.3438
DRP1C_ARATH	sp|Q8LF21|DRP1C_ARATH Phragmoplastin DRP1C OS=Arabidopsis thaliana OX=3702 GN=DRP1C PE=1 SV=2	DRP1C	68723	41	78.83	36	0.386298	0.0208768	27.681	27.4572	27.7093	27.9622	27.9437	28.1005
DRP1E_ARATH	sp|Q9FNX5|DRP1E_ARATH Phragmoplastin DRP1E OS=Arabidopsis thaliana OX=3702 GN=DRP1E PE=1 SV=1	DRP1E	69804	36	69.23	1	0.38618	0.0552483	20.5059	20.9986	20.6756	21.0043	21.1212	21.213
PABN1_ARATH	sp|Q93VI4|PABN1_ARATH Polyadenylate-binding protein 1 OS=Arabidopsis thaliana OX=3702 GN=PABN1 PE=1 SV=1	PABN1	25671	2	15.42	1	0.385895	0.378559	22.4587	22.9086	22.5239	23.2458	23.6559	22.1471
A0A5S9XRF1_ARATH	tr|A0A5S9XRF1|A0A5S9XRF1_ARATH RanBD1 domain-containing protein OS=Arabidopsis thaliana OX=3702 GN=C24_LOCUS17670 PE=4 SV=1	C24_LOCUS17670	47393	3	11.51	2	0.385752	0.479948	21.0092	20.7836	22.6789	21.9621	21.7348	21.9321
HSP7O_ARATH	sp|Q9S7C0|HSP7O_ARATH Heat shock 70 kDa protein 14 OS=Arabidopsis thaliana OX=3702 GN=HSP70-14 PE=1 SV=1	HSP70-14	91750	57	63.9	8	0.385162	0.0573166	25.2832	24.8256	25.3152	25.5001	25.5487	25.5307
MDAR_ARATH	sp|P92947|MDAR_ARATH Monodehydroascorbate reductase, chloroplastic/mitochondrial OS=Arabidopsis thaliana OX=3702 GN=MDAR5 PE=1 SV=3	MDAR5	53302	32	69.98	31	0.384638	0.111936	29.5262	29.4464	29.4243	29.4185	30.0861	30.0462
RL73_ARATH	sp|P60039|RL73_ARATH 60S ribosomal protein L7-3 OS=Arabidopsis thaliana OX=3702 GN=RPL7C PE=2 SV=1	RPL7C	27940	23	70.25	10	0.384614	0.0995364	27.6769	27.9948	28.1471	28.5615	28.0392	28.372
STR12_ARATH	sp|Q93WI0|STR12_ARATH Rhodanese-like/PpiC domain-containing protein 12, chloroplastic OS=Arabidopsis thaliana OX=3702 GN=At5g19370 PE=1 SV=1	At5g19370	32980	11	52.17	9	0.384136	0.063315	25.1109	25.6312	25.1832	25.742	25.7021	25.6337
A0A384KZ65_ARATH	tr|A0A384KZ65|A0A384KZ65_ARATH (thale cress) hypothetical protein OS=Arabidopsis thaliana OX=3702 GN=AXX17_At3g08030 PE=4 SV=1	AXX17_At3g08030	39066	23	73.42	21	0.383791	0.0864379	28.844	28.322	28.521	28.8938	29.1701	28.7743
AL2B7_ARATH	sp|Q8S528|AL2B7_ARATH Aldehyde dehydrogenase family 2 member B7, mitochondrial OS=Arabidopsis thaliana OX=3702 GN=ALDH2B7 PE=1 SV=2	ALDH2B7	58153	21	52.43	17	0.38365	0.0433021	28.9891	28.8479	29.2884	29.4183	29.5085	29.3496
EGY2_ARATH	sp|Q9FFK3|EGY2_ARATH Probable zinc metalloprotease EGY2, chloroplastic OS=Arabidopsis thaliana OX=3702 GN=EGY2 PE=3 SV=1	EGY2	60064	7	21.22	7	0.382298	0.0704597	24.8074	24.8885	24.747	25.2199	24.8941	25.4757
NU50A_ARATH	sp|Q9C829|NU50A_ARATH Nuclear pore complex protein NUP50A OS=Arabidopsis thaliana OX=3702 GN=NUP50A PE=1 SV=1	NUP50A	46592	9	27.5	8	0.381889	0.756647	25.9985	23.0126	23.0692	24.4701	22.6474	26.1085
CASP_ARATH	sp|Q9LS42|CASP_ARATH Protein CASP OS=Arabidopsis thaliana OX=3702 GN=CASP PE=1 SV=2	CASP	79684	4	6.97	3	0.381654	0.221308	23.3052	22.4285	22.8606	22.8752	23.4203	23.4437
PUMP1_ARATH	sp|O81845|PUMP1_ARATH Mitochondrial uncoupling protein 1 OS=Arabidopsis thaliana OX=3702 GN=PUMP1 PE=1 SV=1	PUMP1	32662	22	59.8	21	0.380856	0.0328181	27.4601	27.7286	27.5712	28.144	27.8644	27.8941
Y3148_ARATH	sp|C0LGN2|Y3148_ARATH Probable leucine-rich repeat receptor-like serine/threonine-protein kinase At3g14840 OS=Arabidopsis thaliana OX=3702 GN=LRR-RLK PE=1 SV=1	LRR-RLK	112277	29	36.57	26	0.380687	0.0173566	27.0838	26.979	26.8951	27.478	27.2844	27.3377
A0A654EKY4_ARATH	tr|A0A654EKY4|A0A654EKY4_ARATH S5 DRBM domain-containing protein OS=Arabidopsis thaliana OX=3702 GN=AN1_LOCUS4923 PE=3 SV=1	AN1_LOCUS4923	30742	18	52.46	10	0.380134	0.124731	26.737	27.0917	27.4954	27.3728	27.5757	27.516
A0A178VLL4_ARATH	tr|A0A178VLL4|A0A178VLL4_ARATH Trafficking protein particle complex subunit 2-like protein OS=Arabidopsis thaliana OX=3702 GN=At2g20930 PE=3 SV=1	At2g20930	15679	3	32.14	2	0.379854	0.207129	21.9373	21.8656	21.9978	22.6991	21.7284	22.5129
CYSK1_ARATH	sp|P47998|CYSK1_ARATH Cysteine synthase 1 OS=Arabidopsis thaliana OX=3702 GN=OASA1 PE=1 SV=2	OASA1	33805	35	77.95	34	0.379846	0.0119309	29.5877	29.6814	29.4974	29.9377	29.9856	29.9827
XPO1A_ARATH	sp|Q9SMV6|XPO1A_ARATH Protein EXPORTIN 1A OS=Arabidopsis thaliana OX=3702 GN=XPO1 PE=1 SV=1	XPO1	123243	28	34.51	24	0.379399	0.0110397	26.7435	26.855	26.7462	27.206	27.1809	27.096
A0A1P8AWX3_ARATH	tr|A0A1P8AWX3|A0A1P8AWX3_ARATH Leucine-rich repeat (LRR) family protein OS=Arabidopsis thaliana OX=3702 GN=At1g33590 PE=1 SV=1	At1g33590	55838	26	62.06	24	0.379333	0.0126376	28.786	28.8138	28.8606	29.3054	29.1233	29.1697
THO4B_ARATH	sp|Q8L719|THO4B_ARATH THO complex subunit 4B OS=Arabidopsis thaliana OX=3702 GN=ALY2 PE=1 SV=1	ALY2	30780	6	26.71	5	0.379156	0.0201969	25.2557	25.4162	25.463	25.638	25.7952	25.8391
C71B6_ARATH	sp|O65787|C71B6_ARATH Cytochrome P450 71B6 OS=Arabidopsis thaliana OX=3702 GN=CYP71B6 PE=2 SV=1	CYP71B6	57009	12	35.19	11	0.378033	0.108385	24.4426	24.5242	24.8021	25.1481	25.147	24.6079
A0A384KXP3_ARATH	tr|A0A384KXP3|A0A384KXP3_ARATH Protein transport protein SEC23 OS=Arabidopsis thaliana OX=3702 GN=At3g23660 PE=1 SV=1	At3g23660	84047	10	24.71	3	0.37725	0.410984	22.8091	22.2588	23.6425	22.7141	23.6939	23.4342
A0A7G2EHR6_ARATH	tr|A0A7G2EHR6|A0A7G2EHR6_ARATH (thale cress) hypothetical protein OS=Arabidopsis thaliana OX=3702 GN=AT9943_LOCUS10765 PE=3 SV=1	AT9943_LOCUS10765	96907	2	3.11	2	0.376725	0.334999	21.9734	22.4061	21.1187	22.5472	22.0442	22.0369
A0A178UK01_ARATH	tr|A0A178UK01|A0A178UK01_ARATH Calcium load-activated calcium channel OS=Arabidopsis thaliana OX=3702 GN=At5g06660 PE=1 SV=1	At5g06660	21417	3	21.43	2	0.376602	0.525761	21.722	22.152	20.6202	22.2337	20.932	22.4583
GGT2_ARATH	sp|Q9S7E9|GGT2_ARATH Glutamate--glyoxylate aminotransferase 2 OS=Arabidopsis thaliana OX=3702 GN=GGAT2 PE=1 SV=1	GGAT2	53444	22	45.53	2	0.376524	0.347355	25.6917	25.4823	24.4107	25.2582	25.7284	25.7278
A0A178UXI0_ARATH	tr|A0A178UXI0|A0A178UXI0_ARATH Uncharacterized protein OS=Arabidopsis thaliana OX=3702 GN=AXX17_At4g01020 PE=1 SV=1	AXX17_At4g01020	34323	1	3.01	1	0.376423	0.272211	21.9616	21.9877	21.9697	21.7425	22.3369	22.9688
DGK5_ARATH	sp|Q9C5E5|DGK5_ARATH Diacylglycerol kinase 5 OS=Arabidopsis thaliana OX=3702 GN=DGK5 PE=2 SV=1	DGK5	57377	6	18.47	3	0.375636	0.565581	21.3566	21.5059	22.1382	22.648	20.6658	22.8138
Y1181_ARATH	sp|Q94BU1|Y1181_ARATH Uncharacterized aarF domain-containing protein kinase At1g71810, chloroplastic OS=Arabidopsis thaliana OX=3702 GN=At1g71810 PE=1 SV=1	At1g71810	77462	4	6.65	3	0.375226	0.830632	22.2605	20.3708	25.6699	25.1795	20.7986	23.4487
BBE15_ARATH	sp|O64743|BBE15_ARATH Berberine bridge enzyme-like 15 OS=Arabidopsis thaliana OX=3702 GN=MEE23 PE=1 SV=1	MEE23	59647	18	39.1	9	0.374964	0.226456	24.8429	24.4872	24.6809	24.6086	25.6065	24.9207
A0A7G2FCM3_ARATH	tr|A0A7G2FCM3|A0A7G2FCM3_ARATH (thale cress) hypothetical protein OS=Arabidopsis thaliana OX=3702 GN=AT9943_LOCUS19747 PE=3 SV=1	AT9943_LOCUS19747	147652	6	6.34	5	0.374332	0.0405244	23.4763	23.3259	23.5805	23.7022	23.763	24.0406
SCO11_ARATH	sp|Q8VYP0|SCO11_ARATH Protein SCO1 homolog 1, mitochondrial OS=Arabidopsis thaliana OX=3702 GN=HCC1 PE=1 SV=1	HCC1	37195	3	10.78	1	0.373848	0.191339	21.1774	21.5369	22.1221	22.0953	21.9116	21.9511
VAP22_ARATH	sp|B9DHD7|VAP22_ARATH Vesicle-associated protein 2-2 OS=Arabidopsis thaliana OX=3702 GN=PVA22 PE=1 SV=1	PVA22	43270	9	27.46	9	0.373407	0.0975989	24.7921	25.3961	25.1549	25.6503	25.348	25.465
UBP14_ARATH	sp|Q8L6Y1|UBP14_ARATH Ubiquitin carboxyl-terminal hydrolase 14 OS=Arabidopsis thaliana OX=3702 GN=UBP14 PE=1 SV=1	UBP14	88374	12	19.57	10	0.372657	0.193985	24.7093	24.9949	25.485	25.1196	25.6933	25.4943
A0A178UGL2_ARATH	tr|A0A178UGL2|A0A178UGL2_ARATH Uncharacterized protein OS=Arabidopsis thaliana OX=3702 GN=AXX17_At5g24580 PE=4 SV=1	AXX17_At5g24580	148083	29	32.1	24	0.372231	0.157955	25.3516	26.0324	25.5796	25.7397	26.088	26.2526
DHAR1_ARATH	sp|Q9FWR4|DHAR1_ARATH Glutathione S-transferase DHAR1, mitochondrial OS=Arabidopsis thaliana OX=3702 GN=DHAR1 PE=1 SV=1	DHAR1	23641	20	93.43	20	0.372217	0.0622734	30.2279	30.3028	30.4631	30.9841	30.5434	30.583
COG6_ARATH	sp|Q6NMI3|COG6_ARATH Conserved oligomeric Golgi complex subunit 6 OS=Arabidopsis thaliana OX=3702 GN=COG6 PE=1 SV=1	COG6	75792	9	20.29	7	0.372208	0.149396	22.985	23.5688	23.139	23.5708	23.3273	23.9113
PKP3_ARATH	sp|Q93Z53|PKP3_ARATH Plastidial pyruvate kinase 3, chloroplastic OS=Arabidopsis thaliana OX=3702 GN=PKP3 PE=1 SV=1	PKP3	62615	7	14.19	4	0.372199	0.282053	23.705	23.3294	23.7349	23.7509	23.5184	24.6166
GALK1_ARATH	sp|Q9SEE5|GALK1_ARATH Galactokinase OS=Arabidopsis thaliana OX=3702 GN=GAL1 PE=1 SV=2	GAL1	54341	21	60.48	19	0.370506	0.0542008	26.3298	26.2415	26.6347	26.6067	26.8719	26.839
ALIS3_ARATH	sp|Q9SLK2|ALIS3_ARATH ALA-interacting subunit 3 OS=Arabidopsis thaliana OX=3702 GN=ALIS3 PE=1 SV=1	ALIS3	38955	4	17.77	3	0.369917	0.216374	23.053	22.8336	23.4256	23.7518	22.9881	23.682
PMTO_ARATH	sp|Q6NPR7|PMTO_ARATH Probable methyltransferase PMT24 OS=Arabidopsis thaliana OX=3702 GN=At1g29470 PE=2 SV=1	At1g29470	87205	24	40.39	22	0.369268	0.0128688	27.2656	27.301	27.1821	27.696	27.5872	27.5734
ARF3_ARATH	sp|P40940|ARF3_ARATH ADP-ribosylation factor 3 OS=Arabidopsis thaliana OX=3702 GN=ARF3 PE=1 SV=2	ARF3	20242	6	54.4	6	0.367532	0.0860763	25.6915	25.732	25.192	25.8425	25.8718	26.0039
TCPB_ARATH	sp|Q940P8|TCPB_ARATH T-complex protein 1 subunit beta OS=Arabidopsis thaliana OX=3702 GN=CCT2 PE=1 SV=1	CCT2	57286	36	81.78	34	0.367406	0.0203994	28.2279	28.2794	28.4804	28.681	28.7442	28.6648
DPH5_ARATH	sp|O81769|DPH5_ARATH Probable diphthine methyl ester synthase OS=Arabidopsis thaliana OX=3702 GN=At4g31790 PE=2 SV=1	At4g31790	30790	8	38.63	1	0.366902	0.216903	20.5608	21.2307	21.1668	21.0796	21.756	21.2234
OST48_ARATH	sp|Q944K2|OST48_ARATH Dolichyl-diphosphooligosaccharide--protein glycosyltransferase 48 kDa subunit OS=Arabidopsis thaliana OX=3702 GN=OST48 PE=2 SV=1	OST48	48744	20	49.66	18	0.366574	0.144169	28.1466	27.4449	28.1176	28.2705	28.3532	28.185
PDS5A_ARATH	sp|B6EUB3|PDS5A_ARATH Sister chromatid cohesion protein PDS5 homolog A OS=Arabidopsis thaliana OX=3702 GN=PDS5A PE=1 SV=1	PDS5A	181210	31	24.8	28	0.366354	0.0369484	26.0649	25.8858	25.9559	26.5044	26.1443	26.3569
CID4_ARATH	sp|Q94AM9|CID4_ARATH Polyadenylate-binding protein-interacting protein 4 OS=Arabidopsis thaliana OX=3702 GN=CID4 PE=2 SV=1	CID4	65709	5	12.61	4	0.366276	0.469873	22.2154	21.9996	22.4575	23.3446	22.8841	21.5426
UGDH2_ARATH	sp|Q9LIA8|UGDH2_ARATH UDP-glucose 6-dehydrogenase 2 OS=Arabidopsis thaliana OX=3702 GN=UGD2 PE=1 SV=1	UGD2	53173	43	90.21	1	0.365486	0.0589202	24.679	24.9936	24.8194	25.2221	25.385	24.9814
AXS2_ARATH	sp|Q9SGE0|AXS2_ARATH UDP-D-apiose/UDP-D-xylose synthase 2 OS=Arabidopsis thaliana OX=3702 GN=AXS2 PE=2 SV=1	AXS2	43790	29	74.55	7	0.365406	0.0300887	26.0204	26.3664	26.1769	26.5824	26.5023	26.5752
G6PD5_ARATH	sp|Q9LK23|G6PD5_ARATH Glucose-6-phosphate 1-dehydrogenase 5, cytoplasmic OS=Arabidopsis thaliana OX=3702 GN=G6PD5 PE=1 SV=1	G6PD5	59157	21	49.03	14	0.365133	0.0635517	25.9548	26.1524	26.2946	26.3491	26.7324	26.4157
URIC_ARATH	sp|O04420|URIC_ARATH Uricase OS=Arabidopsis thaliana OX=3702 GN=At2g26230 PE=1 SV=2	At2g26230	34881	11	59.55	9	0.363958	0.188997	24.1225	24.3921	24.6185	24.9186	25.0193	24.2871
F4JBU0_ARATH	tr|F4JBU0|F4JBU0_ARATH Phosphoglycerate mutase family protein OS=Arabidopsis thaliana OX=3702 GN=At3g60440 PE=1 SV=1	At3g60440	32337	8	42.27	6	0.363835	0.19766	24.6334	24.7226	24.4488	24.9189	24.5306	25.4467
A0A5S9TJM9_ARATH	tr|A0A5S9TJM9|A0A5S9TJM9_ARATH Uncharacterized protein OS=Arabidopsis thaliana OX=3702 GN=At1g09850 PE=3 SV=1	At1g09850	48043	10	29.52	9	0.363016	0.0374265	25.9646	25.8115	25.7762	26.3989	26.0553	26.1872
NSP5_ARATH	sp|Q93XW5|NSP5_ARATH Nitrile-specifier protein 5 OS=Arabidopsis thaliana OX=3702 GN=NSP5 PE=2 SV=1	NSP5	35853	6	29.45	5	0.362804	0.332476	25.3416	24.157	24.2072	24.7969	25.0793	24.9179
SPP_ARATH	sp|Q9FIH8|SPP_ARATH Stromal processing peptidase, chloroplastic OS=Arabidopsis thaliana OX=3702 GN=SPP PE=2 SV=1	SPP	140607	9	11.23	9	0.362453	0.708424	23.1928	25.5666	25.5226	26.0191	25.7625	23.5879
CHLG_ARATH	sp|Q38833|CHLG_ARATH Chlorophyll synthase, chloroplastic OS=Arabidopsis thaliana OX=3702 GN=CHLG PE=2 SV=1	CHLG	41881	1	5.43	1	0.36128	0.0937996	23.7045	23.2336	23.4734	23.7838	23.6447	24.0668
EDA2_ARATH	sp|Q1PF50|EDA2_ARATH Probable serine protease EDA2 OS=Arabidopsis thaliana OX=3702 GN=EDA2 PE=2 SV=2	EDA2	55807	1	2.45	1	0.360875	0.527373	23.6221	21.6595	23.3193	22.8888	23.4315	23.3632
RBG6_ARATH	sp|Q9FZ84|RBG6_ARATH Glycine-rich RNA-binding protein 6, mitochondrial OS=Arabidopsis thaliana OX=3702 GN=RBG6 PE=2 SV=1	RBG6	15960	2	25.16	1	0.36087	0.207441	21.7122	21.5101	21.1385	21.5558	22.2684	21.6193
DJ1F_ARATH	sp|Q9M1G8|DJ1F_ARATH DJ-1 protein homolog F OS=Arabidopsis thaliana OX=3702 GN=DJ1F PE=1 SV=1	DJ1F	43142	16	35.84	15	0.359328	0.09439	27.58	27.7774	27.7658	27.8853	27.9054	28.4105
PGML1_ARATH	sp|Q9FGF0|PGML1_ARATH Phosphoglycerate mutase-like protein 1 OS=Arabidopsis thaliana OX=3702 GN=At5g64460 PE=2 SV=1	At5g64460	31599	14	68.44	13	0.358855	0.0735923	25.0475	25.0427	25.4065	25.7076	25.5299	25.3357
GRXC2_ARATH	sp|Q9FNE2|GRXC2_ARATH Glutaredoxin-C2 OS=Arabidopsis thaliana OX=3702 GN=GRXC2 PE=3 SV=1	GRXC2	11756	9	82.88	9	0.358697	0.108701	27.1479	27.6202	27.0246	27.5627	27.5334	27.7727
DRP2A_ARATH	sp|Q9SE83|DRP2A_ARATH Dynamin-2A OS=Arabidopsis thaliana OX=3702 GN=DRP2A PE=1 SV=2	DRP2A	99166	46	56.02	15	0.358588	0.0203443	25.9099	25.7672	25.9531	26.2433	26.1463	26.3164
Y1222_ARATH	sp|Q9FVR6|Y1222_ARATH Uncharacterized protein At1g32220, chloroplastic OS=Arabidopsis thaliana OX=3702 GN=At1g32220 PE=1 SV=1	At1g32220	31979	5	18.58	4	0.357824	0.0878384	24.0534	24.5286	24.0647	24.4597	24.5332	24.7273
TGA2_ARATH	sp|P43273|TGA2_ARATH Transcription factor TGA2 OS=Arabidopsis thaliana OX=3702 GN=TGA2 PE=1 SV=1	TGA2	36684	4	13.94	1	0.357435	0.197002	20.4422	20.9099	20.9446	21.4355	20.7047	21.2288
2AB2B_ARATH	sp|Q5QIT3|2AB2B_ARATH Serine/threonine protein phosphatase 2A regulatory subunit B''beta OS=Arabidopsis thaliana OX=3702 GN=B''BETA PE=1 SV=1	B''BETA	61977	22	44.4	20	0.35729	0.0660104	25.9503	26.1258	25.7198	26.1879	26.199	26.4809
NDHS_ARATH	sp|Q9T0A4|NDHS_ARATH NAD(P)H-quinone oxidoreductase subunit S, chloroplastic OS=Arabidopsis thaliana OX=3702 GN=ndhS PE=1 SV=1	ndhS	27727	5	27.2	4	0.35715	0.368696	22.5993	24.0358	23.2005	23.4745	23.7016	23.7309
NADC_ARATH	sp|Q9ZU32|NADC_ARATH Nicotinate-nucleotide pyrophosphorylase [carboxylating], chloroplastic OS=Arabidopsis thaliana OX=3702 GN=QPT PE=1 SV=2	QPT	37955	8	33.91	8	0.357006	0.0937183	24.5322	24.502	24.9074	25.1694	24.7578	25.0854
CX6B1_ARATH	sp|Q9S7L9|CX6B1_ARATH Cytochrome c oxidase subunit 6b-1 OS=Arabidopsis thaliana OX=3702 GN=COX6B-1 PE=1 SV=1	COX6B-1	21195	5	38.22	5	0.35669	0.19003	24.4004	25.0676	24.282	25.0919	24.7472	24.981
CDPK7_ARATH	sp|Q38873|CDPK7_ARATH Calcium-dependent protein kinase 7 OS=Arabidopsis thaliana OX=3702 GN=CPK7 PE=2 SV=1	CPK7	60310	5	9.53	1	0.356508	0.147531	21.2556	21.9223	21.8643	22.1822	21.8909	22.0385
SDH6_ARATH	sp|Q941A6|SDH6_ARATH Succinate dehydrogenase subunit 6, mitochondrial OS=Arabidopsis thaliana OX=3702 GN=SDH6 PE=1 SV=1	SDH6	15813	10	68.31	8	0.356492	0.0202314	26.3993	26.3371	26.573	26.7677	26.8283	26.7828
A0A178WA70_ARATH	tr|A0A178WA70|A0A178WA70_ARATH (thale cress) hypothetical protein OS=Arabidopsis thaliana OX=3702 GN=AXX17_At1g43930 PE=4 SV=1	AXX17_At1g43930	39826	7	23.96	6	0.356361	0.0735699	23.916	24.1046	24.0867	24.5195	24.5598	24.0972
PSA5A_ARATH	sp|O81149|PSA5A_ARATH Proteasome subunit alpha type-5-A OS=Arabidopsis thaliana OX=3702 GN=PAE1 PE=1 SV=1	PAE1	25947	19	94.94	18	0.356292	0.0170821	27.5778	27.5746	27.5539	28.0473	27.8729	27.855
KASC2_ARATH	sp|Q9C9P4|KASC2_ARATH 3-oxoacyl-[acyl-carrier-protein] synthase II, chloroplastic OS=Arabidopsis thaliana OX=3702 GN=KAS2 PE=1 SV=1	KAS2	57600	17	46.4	15	0.356194	0.142597	25.9234	26.4573	25.74	26.267	26.4712	26.4511
A0A8F5V8L5_ARATH	tr|A0A8F5V8L5|A0A8F5V8L5_ARATH Photosystem I iron-sulfur center OS=Arabidopsis thaliana OX=3702 GN=psaC PE=3 SV=1	psaC	9038	10	92.59	9	0.355558	0.115364	29.6891	29.7554	29.1509	29.9898	29.7848	29.8875
MAP22_ARATH	sp|Q56Y85|MAP22_ARATH Methionine aminopeptidase 2B OS=Arabidopsis thaliana OX=3702 GN=MAP2B PE=2 SV=2	MAP2B	49060	11	34.62	11	0.355166	0.331074	26.3993	25.2193	26.2944	26.1829	26.345	26.4506
PDAT1_ARATH	sp|Q9FNA9|PDAT1_ARATH Phospholipid:diacylglycerol acyltransferase 1 OS=Arabidopsis thaliana OX=3702 GN=PDAT1 PE=2 SV=1	PDAT1	74157	3	6.86	2	0.354779	0.0655681	22.4492	22.6608	22.5447	22.9012	23.1452	22.6726
ATP7_ARATH	sp|Q9SJ12|ATP7_ARATH Probable ATP synthase 24 kDa subunit, mitochondrial OS=Arabidopsis thaliana OX=3702 GN=At2g21870 PE=1 SV=1	At2g21870	27597	22	69.58	22	0.354639	0.0516557	27.1994	27.4176	27.1994	27.7951	27.6655	27.4197
AMPL1_ARATH	sp|P30184|AMPL1_ARATH Leucine aminopeptidase 1 OS=Arabidopsis thaliana OX=3702 GN=LAP1 PE=1 SV=1	LAP1	54509	52	95.96	49	0.353728	0.0131489	30.2307	30.3198	30.2136	30.6203	30.6411	30.5639
DRP2B_ARATH	sp|Q9LQ55|DRP2B_ARATH Dynamin-2B OS=Arabidopsis thaliana OX=3702 GN=DRP2B PE=1 SV=2	DRP2B	100228	50	61.2	46	0.353154	0.0141473	28.3751	28.3198	28.4028	28.6542	28.7152	28.7878
RBCMT_ARATH	sp|Q9XI84|RBCMT_ARATH [Fructose-bisphosphate aldolase]-lysine N-methyltransferase, chloroplastic OS=Arabidopsis thaliana OX=3702 GN=LSMT-L PE=1 SV=1	LSMT-L	54612	5	13.69	5	0.352209	0.62472	21.482	24.071	23.3621	22.8444	23.4987	23.6286
SKP1B_ARATH	sp|Q9FHW7|SKP1B_ARATH SKP1-like protein 1B OS=Arabidopsis thaliana OX=3702 GN=SKP1B PE=1 SV=1	SKP1B	19097	3	20.47	1	0.351062	0.0744973	21.6385	21.7995	21.6772	21.7692	22.2721	22.1271
BAS1B_ARATH	sp|Q9C5R8|BAS1B_ARATH 2-Cys peroxiredoxin BAS1-like, chloroplastic OS=Arabidopsis thaliana OX=3702 GN=At5g06290 PE=2 SV=3	At5g06290	29780	19	67.03	5	0.350685	0.0394222	27.0931	26.7739	27.0763	27.337	27.2601	27.3982
XTH21_ARATH	sp|Q9ZV40|XTH21_ARATH Probable xyloglucan endotransglucosylase/hydrolase protein 21 OS=Arabidopsis thaliana OX=3702 GN=XTH21 PE=2 SV=1	XTH21	34145	2	7.21	1	0.349545	0.254532	23.1637	23.524	22.5414	23.6205	23.4519	23.2054
RL183_ARATH	sp|Q940B0|RL183_ARATH 60S ribosomal protein L18-3 OS=Arabidopsis thaliana OX=3702 GN=RPL18C PE=2 SV=1	RPL18C	20967	20	64.17	8	0.349234	0.115727	26.6041	27.1228	26.7767	27.3109	27.3027	26.9377
GLN13_ARATH	sp|Q9LVI8|GLN13_ARATH Glutamine synthetase cytosolic isozyme 1-3 OS=Arabidopsis thaliana OX=3702 GN=GLN1-3 PE=1 SV=1	GLN1-3	38595	29	76.55	27	0.348896	0.0161539	28.5704	28.6102	28.6801	29.0283	28.9885	28.8906
A0A384KNV7_ARATH	tr|A0A384KNV7|A0A384KNV7_ARATH Uncharacterized protein OS=Arabidopsis thaliana OX=3702 GN=At3g19990 PE=4 SV=1	At3g19990	48416	4	15.53	1	0.348178	0.175672	21.3197	20.6589	21.0042	21.3396	21.6118	21.0759
PP1R7_ARATH	sp|Q84WJ9|PP1R7_ARATH Protein phosphatase 1 regulatory inhibitor subunit PPP1R7 homolog OS=Arabidopsis thaliana OX=3702 GN=At5g19680 PE=1 SV=1	At5g19680	36985	5	28.05	2	0.348025	0.252789	21.7001	22.5096	22.2322	22.6847	22.1022	22.699
U71C4_ARATH	sp|Q9LML6|U71C4_ARATH Flavonol 3-O-glucosyltransferase UGT71C4 OS=Arabidopsis thaliana OX=3702 GN=UGT71C4 PE=1 SV=2	UGT71C4	52844	5	14.41	5	0.347788	0.294973	24.1903	24.1978	23.2241	24.4523	24.0871	24.1162
PP12_ARATH	sp|P48482|PP12_ARATH Serine/threonine-protein phosphatase PP1 isozyme 2 OS=Arabidopsis thaliana OX=3702 GN=TOPP2 PE=1 SV=1	TOPP2	35532	7	32.37	6	0.347232	0.148081	24.2893	24.1596	24.8117	24.9605	24.639	24.7027
MGAT1_ARATH	sp|Q9XGM8|MGAT1_ARATH Alpha-1,3-mannosyl-glycoprotein 2-beta-N-acetylglucosaminyltransferase OS=Arabidopsis thaliana OX=3702 GN=GNTI PE=1 SV=1	GNTI	51634	5	10.36	2	0.347138	0.170142	20.1291	20.422	20.7544	21.0858	20.5515	20.7096
PGP2_ARATH	sp|Q8GWU0|PGP2_ARATH Phosphoglycolate phosphatase 2 OS=Arabidopsis thaliana OX=3702 GN=PGLP2 PE=1 SV=1	PGLP2	33012	2	7.64	1	0.347013	0.126151	22.3914	22.1562	21.7803	22.3612	22.3542	22.6535
SCP29_ARATH	sp|Q949Q7|SCP29_ARATH Serine carboxypeptidase-like 29 OS=Arabidopsis thaliana OX=3702 GN=SCPL29 PE=2 SV=1	SCPL29	53056	9	34.45	8	0.346887	0.091763	24.9694	25.3374	24.8028	25.3899	25.4978	25.2625
COPE1_ARATH	sp|Q9SA78|COPE1_ARATH Coatomer subunit epsilon-1 OS=Arabidopsis thaliana OX=3702 GN=At1g30630 PE=2 SV=1	At1g30630	32602	26	90.07	23	0.346772	0.0301433	27.6819	27.9284	27.967	28.1888	28.1839	28.2449
UBC10_ARATH	sp|P35133|UBC10_ARATH Ubiquitin-conjugating enzyme E2 10 OS=Arabidopsis thaliana OX=3702 GN=UBC10 PE=1 SV=1	UBC10	16537	5	37.84	5	0.346713	0.107202	25.5889	26.2181	25.9498	26.3169	26.189	26.291
A0A1I9LRM4_ARATH	tr|A0A1I9LRM4|A0A1I9LRM4_ARATH LUC7 related protein OS=Arabidopsis thaliana OX=3702 GN=UNE6 PE=1 SV=1	UNE6	56980	4	11.88	4	0.346092	0.651021	22.0585	22.9189	21.2745	21.086	23.5512	22.653
MAOP2_ARATH	sp|Q9LYG3|MAOP2_ARATH NADP-dependent malic enzyme 2 OS=Arabidopsis thaliana OX=3702 GN=NADP-ME2 PE=1 SV=1	NADP-ME2	64413	53	91.67	52	0.345966	0.0280686	30.251	30.4066	30.5279	30.7621	30.7834	30.678
LPAT2_ARATH	sp|Q8LG50|LPAT2_ARATH 1-acyl-sn-glycerol-3-phosphate acyltransferase 2 OS=Arabidopsis thaliana OX=3702 GN=LPAT2 PE=1 SV=2	LPAT2	43676	3	11.05	2	0.345851	0.537728	21.8137	23.1986	23.187	22.5271	23.9038	22.8059
STAD5_ARATH	sp|Q9M879|STAD5_ARATH Stearoyl-[acyl-carrier-protein] 9-desaturase 5, chloroplastic OS=Arabidopsis thaliana OX=3702 GN=S-ACP-DES5 PE=1 SV=1	S-ACP-DES5	45303	16	54.55	14	0.344558	0.0231316	26.4725	26.3596	26.4898	26.8822	26.6738	26.7995
A0A178UYI2_ARATH	tr|A0A178UYI2|A0A178UYI2_ARATH Uncharacterized protein OS=Arabidopsis thaliana OX=3702 GN=AXX17_At4g41360 PE=3 SV=1	AXX17_At4g41360	72762	4	7.44	4	0.343798	0.558723	21.905	22.4223	22.167	23.4138	22.8333	21.2786
P2C58_ARATH	sp|Q93YW5|P2C58_ARATH Probable protein phosphatase 2C 58 OS=Arabidopsis thaliana OX=3702 GN=At4g28400 PE=2 SV=1	At4g28400	31018	15	50.88	9	0.343785	0.0393428	26.412	26.1623	26.442	26.6187	26.6284	26.8005
VA0D2_ARATH	sp|Q9LHA4|VA0D2_ARATH V-type proton ATPase subunit d2 OS=Arabidopsis thaliana OX=3702 GN=VHA-d2 PE=2 SV=1	VHA-d2	40788	33	87.46	2	0.343473	0.0674998	25.0234	24.744	25.1396	25.4203	25.1476	25.3694
A0A178WI60_ARATH	tr|A0A178WI60|A0A178WI60_ARATH Signal recognition particle subunit SRP72 OS=Arabidopsis thaliana OX=3702 GN=At1g67680 PE=3 SV=1	At1g67680	73042	14	33.73	12	0.342937	0.460082	23.7685	25.3595	25.1244	25.1537	25.2404	24.887
CAP10_ARATH	sp|Q9LHS0|CAP10_ARATH Putative clathrin assembly protein At5g35200 OS=Arabidopsis thaliana OX=3702 GN=At5g35200 PE=1 SV=1	At5g35200	61179	5	13.6	3	0.342149	0.247542	22.676	22.734	22.8308	22.7419	22.8503	23.6751
RS92_ARATH	sp|Q9FLF0|RS92_ARATH 40S ribosomal protein S9-2 OS=Arabidopsis thaliana OX=3702 GN=RPS9C PE=1 SV=1	RPS9C	23161	15	49.75	3	0.342108	0.0590384	24.7941	24.6494	24.9806	25.222	24.9665	25.2619
NAT3_ARATH	sp|Q8GZD4|NAT3_ARATH Nucleobase-ascorbate transporter 3 OS=Arabidopsis thaliana OX=3702 GN=NAT3 PE=2 SV=2	NAT3	60170	3	6.35	3	0.341674	0.522951	22.2505	21.2184	20.9295	22.2171	22.2685	20.9377
SEC22_ARATH	sp|Q94AU2|SEC22_ARATH 25.3 kDa vesicle transport protein OS=Arabidopsis thaliana OX=3702 GN=SEC22 PE=2 SV=1	SEC22	25332	6	31.19	5	0.341508	0.170038	24.4012	25.1621	24.6634	25.0089	25.2337	25.0086
A0A178VHZ7_ARATH	tr|A0A178VHZ7|A0A178VHZ7_ARATH Uncharacterized protein OS=Arabidopsis thaliana OX=3702 GN=AXX17_At3g08310 PE=3 SV=1	AXX17_At3g08310	26212	8	32.2	8	0.341443	0.11186	25.3847	25.8602	25.35	26.0347	25.8532	25.7313
TCPH_ARATH	sp|Q9SF16|TCPH_ARATH T-complex protein 1 subunit eta OS=Arabidopsis thaliana OX=3702 GN=CCT7 PE=1 SV=1	CCT7	59776	30	69.84	29	0.341157	0.0151397	28.2967	28.3595	28.3188	28.642	28.735	28.6214
MPPA2_ARATH	sp|O04308|MPPA2_ARATH Probable mitochondrial-processing peptidase subunit alpha-2, chloroplastic/mitochondrial OS=Arabidopsis thaliana OX=3702 GN=MPPalpha2 PE=1 SV=1	MPPalpha2	54053	22	35.27	7	0.340718	0.0162548	25.2476	25.2752	25.3658	25.6918	25.6064	25.6126
Q9SYG5_ARATH	tr|Q9SYG5|Q9SYG5_ARATH Exocyst subunit Exo70 family protein OS=Arabidopsis thaliana OX=3702 GN=ATEXO70D2 PE=1 SV=1	ATEXO70D2	70771	16	34.57	14	0.34012	0.0923098	25.0129	24.6469	24.8095	25.3147	25.2705	24.9045
TRXF2_ARATH	sp|Q9XFH9|TRXF2_ARATH Thioredoxin F2, chloroplastic OS=Arabidopsis thaliana OX=3702 GN=At5g16400 PE=1 SV=1	At5g16400	19999	1	9.73	1	0.340008	0.150522	21.6922	21.6281	21.0656	21.965	21.655	21.7859
A0A178UFA2_ARATH	tr|A0A178UFA2|A0A178UFA2_ARATH Uncharacterized protein OS=Arabidopsis thaliana OX=3702 GN=At5g64090 PE=1 SV=1	At5g64090	47725	4	13.62	4	0.339939	0.0260845	22.9622	23.0191	22.8991	23.2207	23.4382	23.2413
A0A178UI53_ARATH	tr|A0A178UI53|A0A178UI53_ARATH (thale cress) hypothetical protein OS=Arabidopsis thaliana OX=3702 GN=AXX17_At5g13700 PE=3 SV=1	AXX17_At5g13700	28749	2	12.89	2	0.339716	0.154641	22.2122	22.3257	22.4917	22.2726	22.8542	22.922
CML49_ARATH	sp|Q8W4L0|CML49_ARATH Probable calcium-binding protein CML49 OS=Arabidopsis thaliana OX=3702 GN=CML49 PE=2 SV=1	CML49	35302	2	8.36	1	0.339107	0.0615928	21.9684	21.886	22.2022	22.5129	22.3767	22.1843
A0A178VWV5_ARATH	tr|A0A178VWV5|A0A178VWV5_ARATH (thale cress) hypothetical protein OS=Arabidopsis thaliana OX=3702 GN=AXX17_At2g21650 PE=4 SV=1	AXX17_At2g21650	109964	5	8.61	4	0.338861	0.446879	21.2225	22.0296	22.6587	22.3561	22.7159	21.8553
PER34_ARATH	sp|Q9SMU8|PER34_ARATH Peroxidase 34 OS=Arabidopsis thaliana OX=3702 GN=PER34 PE=1 SV=1	PER34	38832	19	47.59	18	0.338623	0.0559472	30.0592	29.8057	29.7262	30.3346	30.2073	30.0651
A0A178V5V4_ARATH	tr|A0A178V5V4|A0A178V5V4_ARATH Cupin_3 domain-containing protein OS=Arabidopsis thaliana OX=3702 GN=AXX17_At4g11540 PE=4 SV=1	AXX17_At4g11540	15139	4	39.71	4	0.338444	0.303644	25.1158	24.0837	24.1536	24.877	24.6427	24.8486
TCPG_ARATH	sp|Q84WV1|TCPG_ARATH T-complex protein 1 subunit gamma OS=Arabidopsis thaliana OX=3702 GN=CCT3 PE=1 SV=1	CCT3	60339	38	61.62	35	0.338278	0.0229982	28.4126	28.244	28.3776	28.7721	28.6354	28.6415
PSD11_ARATH	sp|Q9LP45|PSD11_ARATH 26S proteasome non-ATPase regulatory subunit 11 homolog OS=Arabidopsis thaliana OX=3702 GN=RPN6 PE=1 SV=1	RPN6	46749	33	70.88	31	0.337862	0.0144172	28.0987	28.1935	28.106	28.4748	28.4761	28.4609
Y3739_ARATH	sp|Q8GUM4|Y3739_ARATH Uncharacterized membrane protein At3g27390 OS=Arabidopsis thaliana OX=3702 GN=At3g27390 PE=1 SV=2	At3g27390	65497	1	1.7	1	0.337654	0.0504677	21.4222	21.4198	21.603	21.6164	21.9464	21.8952
ANXD2_ARATH	sp|Q9XEE2|ANXD2_ARATH Annexin D2 OS=Arabidopsis thaliana OX=3702 GN=ANN2 PE=1 SV=1	ANN2	36266	24	75.39	23	0.336635	0.0571205	27.4124	27.7078	27.7044	27.9821	28.0631	27.7893
ACCA_ARATH	sp|Q9LD43|ACCA_ARATH Acetyl-coenzyme A carboxylase carboxyl transferase subunit alpha, chloroplastic OS=Arabidopsis thaliana OX=3702 GN=CAC3 PE=1 SV=1	CAC3	85306	37	56.05	34	0.336487	0.0636082	27.92	28.2769	28.3517	28.4967	28.4983	28.563
CCD4_ARATH	sp|O49675|CCD4_ARATH Probable carotenoid cleavage dioxygenase 4, chloroplastic OS=Arabidopsis thaliana OX=3702 GN=CCD4 PE=1 SV=1	CCD4	65602	17	36.97	15	0.336304	0.186896	25.9312	26.1456	25.4115	25.9451	26.269	26.2832
BIP1_ARATH	sp|Q9LKR3|BIP1_ARATH Heat shock 70 kDa protein BIP1 OS=Arabidopsis thaliana OX=3702 GN=BIP1 PE=1 SV=1	BIP1	73629	54	57.85	6	0.334704	0.0240307	26.199	26.19	26.249	26.4315	26.5516	26.6591
A0A178W8S3_ARATH	tr|A0A178W8S3|A0A178W8S3_ARATH Peptidase A1 domain-containing protein OS=Arabidopsis thaliana OX=3702 GN=At1g03220 PE=3 SV=1	At1g03220	45717	15	38.11	10	0.334679	0.0375134	26.2653	26.0125	26.3153	26.5467	26.4815	26.5689
4CL4_ARATH	sp|Q9LU36|4CL4_ARATH 4-coumarate--CoA ligase 4 OS=Arabidopsis thaliana OX=3702 GN=4CL4 PE=1 SV=1	4CL4	62559	3	7.54	3	0.334407	0.198137	21.409	21.8673	21.6844	21.674	21.895	22.395
HIR3_ARATH	sp|Q9SRH6|HIR3_ARATH Hypersensitive-induced response protein 3 OS=Arabidopsis thaliana OX=3702 GN=HIR3 PE=1 SV=1	HIR3	31321	10	41.05	7	0.334194	0.240689	25.8294	25.4052	25.9226	26.3807	26.1841	25.5951
PMTK_ARATH	sp|Q9C6S7|PMTK_ARATH Probable methyltransferase PMT20 OS=Arabidopsis thaliana OX=3702 GN=At1g31850 PE=2 SV=1	At1g31850	68797	15	36.65	13	0.33377	0.0978866	25.7346	25.461	25.7102	26.123	25.6816	26.1025
GET4_ARATH	sp|Q6GKV1|GET4_ARATH Protein GET4 OS=Arabidopsis thaliana OX=3702 GN=MDC12.19 PE=1 SV=1	MDC12.19	37177	5	21.6	4	0.333577	0.140179	23.3097	23.6699	23.3523	23.7877	23.4776	24.0673
CDPK5_ARATH	sp|Q38871|CDPK5_ARATH Calcium-dependent protein kinase 5 OS=Arabidopsis thaliana OX=3702 GN=CPK5 PE=2 SV=1	CPK5	62127	12	29.14	11	0.332192	0.0234826	26.7535	26.6647	26.6998	26.9263	27.1287	27.0595
CFTSY_ARATH	sp|O80842|CFTSY_ARATH Cell division protein FtsY homolog, chloroplastic OS=Arabidopsis thaliana OX=3702 GN=CPFTSY PE=1 SV=2	CPFTSY	39679	8	26.23	7	0.332177	0.138516	24.1846	24.2923	24.2643	24.6567	24.8797	24.2012
SNF12_ARATH	sp|Q9FMT4|SNF12_ARATH SWI/SNF complex component SNF12 homolog OS=Arabidopsis thaliana OX=3702 GN=At5g14170 PE=1 SV=1	At5g14170	59271	6	16.85	5	0.331841	0.268905	22.8742	23.5212	23.1267	23.8952	23.5541	23.0684
ETFB_ARATH	sp|Q9LSW8|ETFB_ARATH Electron transfer flavoprotein subunit beta, mitochondrial OS=Arabidopsis thaliana OX=3702 GN=ETFB PE=1 SV=1	ETFB	27400	6	40.24	6	0.331132	0.189611	23.8361	24.0936	24.5295	24.2275	24.6696	24.5555
SPDS1_ARATH	sp|Q9ZUB3|SPDS1_ARATH Spermidine synthase 1 OS=Arabidopsis thaliana OX=3702 GN=SPDSYN1 PE=1 SV=1	SPDSYN1	36553	14	71.86	13	0.329792	0.0520213	26.6658	26.9712	26.8795	27.0254	27.2206	27.2598
A0A384KW53_ARATH	tr|A0A384KW53|A0A384KW53_ARATH Protein kinase domain-containing protein OS=Arabidopsis thaliana OX=3702 GN=AXX17_At1g42280 PE=3 SV=1	AXX17_At1g42280	39589	8	35.26	3	0.32951	0.479414	23.7259	23.8253	22.3893	23.804	23.2185	23.9064
A0A7G2EMF1_ARATH	tr|A0A7G2EMF1|A0A7G2EMF1_ARATH (thale cress) hypothetical protein OS=Arabidopsis thaliana OX=3702 GN=AT9943_LOCUS11343 PE=4 SV=1	AT9943_LOCUS11343	59589	12	39.27	1	0.328827	0.267626	21.5438	21.3255	21.3247	21.4246	21.4456	22.3103
Y5597_ARATH	sp|Q9FN92|Y5597_ARATH Probable receptor-like protein kinase At5g59700 OS=Arabidopsis thaliana OX=3702 GN=At5g59700 PE=1 SV=1	At5g59700	91964	4	5.43	1	0.327903	0.407935	21.8848	22.1005	22.9852	22.8739	22.1319	22.9485
CAPP1_ARATH	sp|Q9MAH0|CAPP1_ARATH Phosphoenolpyruvate carboxylase 1 OS=Arabidopsis thaliana OX=3702 GN=PPC1 PE=1 SV=1	PPC1	110286	81	75.9	42	0.327549	0.0218016	29.1208	29.1413	29.2718	29.5241	29.5445	29.4479
GC1_ARATH	sp|Q9SJU9|GC1_ARATH Epimerase family protein SDR39U1 homolog, chloroplastic OS=Arabidopsis thaliana OX=3702 GN=GC1 PE=2 SV=2	GC1	37746	5	17.29	4	0.327349	0.150397	23.8928	23.587	24.0356	23.9269	24.0998	24.4706
TCPQ_ARATH	sp|Q94K05|TCPQ_ARATH T-complex protein 1 subunit theta OS=Arabidopsis thaliana OX=3702 GN=CCT8 PE=1 SV=1	CCT8	58939	36	65.03	35	0.326684	0.0314613	28.4892	28.6312	28.6335	28.8099	28.8932	29.0308
COB23_ARATH	sp|Q8L828|COB23_ARATH Coatomer subunit beta'-3 OS=Arabidopsis thaliana OX=3702 GN=At3g15980 PE=2 SV=1	At3g15980	102476	28	38.72	28	0.32595	0.108643	27.4723	27.6022	27.3229	27.7151	27.5751	28.0851
A0A178UR99_ARATH	tr|A0A178UR99|A0A178UR99_ARATH (thale cress) hypothetical protein OS=Arabidopsis thaliana OX=3702 GN=At5g04830 PE=4 SV=1	At5g04830	20294	5	32.58	5	0.325656	0.11046	24.5769	24.5363	24.3076	24.5575	24.7605	25.0798
NDADB_ARATH	sp|O49313|NDADB_ARATH NADH dehydrogenase [ubiquinone] 1 alpha subcomplex subunit 13-B OS=Arabidopsis thaliana OX=3702 GN=At2g33220 PE=2 SV=1	At2g33220	16122	6	54.55	6	0.325635	0.0361334	25.4442	25.2998	25.4368	25.8287	25.5756	25.7534
Q7M1X0_ARATH	tr|Q7M1X0|Q7M1X0_ARATH Glycine cleavage system protein H1 and H2 (Fragment) OS=Arabidopsis thaliana OX=3702 PE=1 SV=1		1750	1	53.33	1	0.325456	0.0876386	25.2106	24.8811	24.7059	25.2261	25.3324	25.2154
GGT1_ARATH	sp|Q9LR30|GGT1_ARATH Glutamate--glyoxylate aminotransferase 1 OS=Arabidopsis thaliana OX=3702 GN=GGAT1 PE=1 SV=1	GGAT1	53301	48	79.63	48	0.325449	0.0267009	30.3112	30.2524	30.0962	30.5741	30.4993	30.5627
PUX8_ARATH	sp|F4JPR7|PUX8_ARATH Plant UBX domain-containing protein 8 OS=Arabidopsis thaliana OX=3702 GN=PUX8 PE=1 SV=1	PUX8	62350	1	2.66	1	0.324876	0.0543505	20.9291	20.964	20.8416	21.114	21.1399	21.4554
A0A178VYX3_ARATH	tr|A0A178VYX3|A0A178VYX3_ARATH Uncharacterized protein OS=Arabidopsis thaliana OX=3702 GN=AXX17_At2g37390 PE=4 SV=1	AXX17_At2g37390	30034	2	7.97	2	0.324259	0.518262	21.1682	21.5721	21.6431	21.9891	20.7763	22.5908
APXS_ARATH	sp|Q42592|APXS_ARATH L-ascorbate peroxidase S, chloroplastic/mitochondrial OS=Arabidopsis thaliana OX=3702 GN=APXS PE=1 SV=2	APXS	40407	20	62.37	20	0.323914	0.029055	28.6573	28.4764	28.5162	28.8932	28.9453	28.7831
BCA1_ARATH	sp|P27140|BCA1_ARATH Beta carbonic anhydrase 1, chloroplastic OS=Arabidopsis thaliana OX=3702 GN=BCA1 PE=1 SV=2	BCA1	37450	36	69.74	19	0.323889	0.065562	31.02	30.7711	30.7313	31.2546	30.982	31.2574
VSR1_ARATH	sp|P93026|VSR1_ARATH Vacuolar-sorting receptor 1 OS=Arabidopsis thaliana OX=3702 GN=VSR1 PE=1 SV=2	VSR1	68992	8	14.61	4	0.32324	0.691043	22.8125	21.1481	21.0468	22.8766	20.5654	22.5351
BAG7_ARATH	sp|Q9LVA0|BAG7_ARATH BAG family molecular chaperone regulator 7 OS=Arabidopsis thaliana OX=3702 GN=BAG7 PE=1 SV=1	BAG7	51567	30	41.48	29	0.323228	0.0354642	27.3967	27.6117	27.5649	27.9267	27.8752	27.7411
ASPGA_ARATH	sp|P50287|ASPGA_ARATH Isoaspartyl peptidase/L-asparaginase 1 OS=Arabidopsis thaliana OX=3702 GN=At5g08100 PE=1 SV=2	At5g08100	33027	8	38.73	8	0.32307	0.172264	23.567	23.5656	23.7917	23.5752	24.2874	24.031
RETIC_ARATH	sp|B9DFK5|RETIC_ARATH Protein RETICULATA, chloroplastic OS=Arabidopsis thaliana OX=3702 GN=RE PE=1 SV=1	RE	46629	9	26.39	8	0.322789	0.450679	25.9825	25.9359	25.735	25.5961	25.9205	27.1052
A0A654EWV8_ARATH	tr|A0A654EWV8|A0A654EWV8_ARATH Uncharacterized protein OS=Arabidopsis thaliana OX=3702 GN=At1g65270 PE=4 SV=1	At1g65270	32535	6	29.11	6	0.322396	0.0793164	24.8372	25.0628	25.1535	25.5528	25.2191	25.2489
CAND7_ARATH	sp|F4JY11|CAND7_ARATH Protein CANDIDATE G-PROTEIN COUPLED RECEPTOR 7 OS=Arabidopsis thaliana OX=3702 GN=CAND7 PE=2 SV=1	CAND7	50245	3	9.32	3	0.322316	0.32978	23.343	24.1199	23.3375	24.0965	23.4724	24.1985
CLAH2_ARATH	sp|Q0WLB5|CLAH2_ARATH Clathrin heavy chain 2 OS=Arabidopsis thaliana OX=3702 GN=CHC2 PE=1 SV=1	CHC2	193271	123	75.51	21	0.321288	0.0305655	27.7641	27.547	27.5425	27.9628	27.9199	27.9349
BGL44_ARATH	sp|Q9LV33|BGL44_ARATH Beta-glucosidase 44 OS=Arabidopsis thaliana OX=3702 GN=BGLU44 PE=2 SV=1	BGLU44	58983	42	58.59	42	0.321282	0.022109	29.7449	29.5822	29.6911	29.962	29.9965	30.0236
CPNB2_ARATH	sp|Q9LJE4|CPNB2_ARATH Chaperonin 60 subunit beta 2, chloroplastic OS=Arabidopsis thaliana OX=3702 GN=CPN60B2 PE=1 SV=1	CPN60B2	63342	36	60.23	2	0.320964	0.0285561	22.8762	23.0376	22.9579	23.3807	23.2311	23.2228
A0A5S9XKZ1_ARATH	tr|A0A5S9XKZ1|A0A5S9XKZ1_ARATH Pectate lyase OS=Arabidopsis thaliana OX=3702 GN=C24_LOCUS15770 PE=3 SV=1	C24_LOCUS15770	37216	4	16.62	3	0.320858	0.151576	22.8059	23.2349	22.7835	23.5386	23.1717	23.0767
ECH1P_ARATH	sp|Q6NL24|ECH1P_ARATH Probable enoyl-CoA hydratase 1, peroxisomal OS=Arabidopsis thaliana OX=3702 GN=ECHIA PE=1 SV=1	ECHIA	28818	5	22.26	4	0.320661	0.387761	22.9063	23.7735	24.016	24.2289	23.9177	23.5113
INVE_ARATH	sp|Q9FK88|INVE_ARATH Alkaline/neutral invertase E, chloroplastic OS=Arabidopsis thaliana OX=3702 GN=INVE PE=1 SV=1	INVE	69240	6	14.26	5	0.320322	0.116672	23.3873	22.8734	23.2688	23.657	23.4205	23.4129
SYLC_ARATH	sp|F4I116|SYLC_ARATH Leucine--tRNA ligase, cytoplasmic OS=Arabidopsis thaliana OX=3702 GN=At1g09620 PE=1 SV=1	At1g09620	123451	51	63.34	45	0.320248	0.0342753	27.859	28.0487	28.0965	28.2507	28.3708	28.3434
ACS_ARATH	sp|B9DGD6|ACS_ARATH Acetyl-coenzyme A synthetase, chloroplastic/glyoxysomal OS=Arabidopsis thaliana OX=3702 GN=ACS PE=1 SV=1	ACS	81889	35	58.82	29	0.32018	0.0207554	28.136	28.1391	28.2681	28.4804	28.5062	28.5172
TO202_ARATH	sp|P82873|TO202_ARATH Mitochondrial import receptor subunit TOM20-2 OS=Arabidopsis thaliana OX=3702 GN=TOM20-2 PE=1 SV=2	TOM20-2	23170	6	51.43	5	0.319635	0.277569	23.3592	24.3509	23.922	24.1092	24.3637	24.1181
ZDHC9_ARATH	sp|Q0WQK2|ZDHC9_ARATH Probable protein S-acyltransferase 7 OS=Arabidopsis thaliana OX=3702 GN=PAT07 PE=1 SV=1	PAT07	49916	1	3.39	1	0.318506	0.293634	19.9254	19.3236	20.0494	19.8169	20.5099	19.9271
BIP2_ARATH	sp|Q39043|BIP2_ARATH Heat shock 70 kDa protein BIP2 OS=Arabidopsis thaliana OX=3702 GN=BIP2 PE=1 SV=2	BIP2	73561	54	57.78	47	0.318492	0.0208305	30.2556	30.1204	30.1416	30.5131	30.4784	30.4816
A0A178UH76_ARATH	tr|A0A178UH76|A0A178UH76_ARATH Uncharacterized protein OS=Arabidopsis thaliana OX=3702 GN=At5g52420 PE=1 SV=1	At5g52420	26737	2	8.26	2	0.318263	0.16301	22.3679	22.0865	21.8588	22.6015	22.5418	22.1247
GPX6_ARATH	sp|O48646|GPX6_ARATH Probable phospholipid hydroperoxide glutathione peroxidase 6, mitochondrial OS=Arabidopsis thaliana OX=3702 GN=GPX6 PE=2 SV=2	GPX6	25584	15	59.91	14	0.317816	0.0349774	27.2039	27.1147	27.047	27.572	27.3867	27.3603
RNJ_ARATH	sp|Q84W56|RNJ_ARATH Ribonuclease J OS=Arabidopsis thaliana OX=3702 GN=RNJ PE=1 SV=1	RNJ	100554	3	3.84	3	0.317701	0.155953	22.6381	22.1618	22.424	22.8009	22.435	22.941
A0A178UT09_ARATH	tr|A0A178UT09|A0A178UT09_ARATH (thale cress) hypothetical protein OS=Arabidopsis thaliana OX=3702 GN=AXX17_At4g45070 PE=3 SV=1	AXX17_At4g45070	70650	10	25.5	9	0.317488	0.104083	25.3526	25.2015	24.8558	25.3369	25.4545	25.571
PSA3C_ARATH	sp|Q9M3C6|PSA3C_ARATH Photosystem I assembly factor PSA3, chloroplastic OS=Arabidopsis thaliana OX=3702 GN=PSA3 PE=1 SV=1	PSA3	31245	4	17.33	4	0.317425	0.158626	22.3272	22.3099	22.3072	22.7567	22.91	22.2298
M2K2_ARATH	sp|Q9S7U9|M2K2_ARATH Mitogen-activated protein kinase kinase 2 OS=Arabidopsis thaliana OX=3702 GN=MKK2 PE=1 SV=2	MKK2	39848	11	31.13	11	0.31729	0.0241502	25.9097	25.8902	25.8153	26.1982	26.2635	26.1052
CCT1_ARATH	sp|Q9ZV56|CCT1_ARATH Choline-phosphate cytidylyltransferase 1 OS=Arabidopsis thaliana OX=3702 GN=CCT1 PE=1 SV=1	CCT1	38486	8	40.06	7	0.316993	0.0481741	24.7302	24.8936	25.0439	25.2871	25.2045	25.1271
CP18C_ARATH	sp|P34790|CP18C_ARATH Peptidyl-prolyl cis-trans isomerase CYP18-3 OS=Arabidopsis thaliana OX=3702 GN=CYP18-3 PE=1 SV=1	CYP18-3	18373	16	83.72	16	0.316855	0.0289216	29.0263	29.1244	28.8995	29.3043	29.3393	29.3571
NACA4_ARATH	sp|Q9SZY1|NACA4_ARATH Nascent polypeptide-associated complex subunit alpha-like protein 4 OS=Arabidopsis thaliana OX=3702 GN=At4g10480 PE=1 SV=1	At4g10480	23172	7	43.4	7	0.316055	0.35709	23.4889	24.314	24.4552	24.7473	24.0566	24.4023
RLA02_ARATH	sp|Q42112|RLA02_ARATH 60S acidic ribosomal protein P0-2 OS=Arabidopsis thaliana OX=3702 GN=RPP0B PE=1 SV=2	RPP0B	34133	26	85.62	24	0.315883	0.0301963	29.4746	29.5726	29.5992	29.7594	29.9588	29.8758
PSDE_ARATH	sp|Q9LT08|PSDE_ARATH 26S proteasome non-ATPase regulatory subunit 14 homolog OS=Arabidopsis thaliana OX=3702 GN=RPN11 PE=1 SV=1	RPN11	34353	17	81.49	17	0.315821	0.0446765	27.2578	27.1346	26.9866	27.461	27.3392	27.5264
SAT3_ARATH	sp|Q39218|SAT3_ARATH Serine acetyltransferase 3, mitochondrial OS=Arabidopsis thaliana OX=3702 GN=SAT3 PE=1 SV=3	SAT3	42721	7	33.25	7	0.315591	0.157881	25.1027	25.5719	25.2749	25.8891	25.6411	25.3661
BCA5_ARATH	sp|Q94CE3|BCA5_ARATH Beta carbonic anhydrase 5, chloroplastic OS=Arabidopsis thaliana OX=3702 GN=BCA5 PE=2 SV=1	BCA5	33401	5	23.59	2	0.315245	0.438168	23.4376	24.3355	24.9295	24.6828	24.5294	24.4362
AMPP2_ARATH	sp|Q8RY11|AMPP2_ARATH Aminopeptidase P2 OS=Arabidopsis thaliana OX=3702 GN=APP2 PE=2 SV=1	APP2	78709	11	27.04	10	0.315136	0.744484	24.3111	26.2266	22.4785	24.3596	24.5884	25.0136
D89S2_ARATH	sp|Q949P3|D89S2_ARATH Damage-control phosphatase At2g17340 OS=Arabidopsis thaliana OX=3702 GN=At2g17340 PE=1 SV=1	At2g17340	40858	12	54.22	6	0.314443	0.205127	24.0317	24.2232	23.7512	24.1195	24.7068	24.123
PME51_ARATH	sp|Q9LXD9|PME51_ARATH Probable pectinesterase/pectinesterase inhibitor 51 OS=Arabidopsis thaliana OX=3702 GN=PME51 PE=2 SV=1	PME51	60439	4	13.79	4	0.314163	0.339695	22.5781	23.3764	23.4522	23.7448	23.0682	23.5361
A0A178VNQ1_ARATH	tr|A0A178VNQ1|A0A178VNQ1_ARATH NodGS OS=Arabidopsis thaliana OX=3702 GN=AXX17_At3g47580 PE=3 SV=1	AXX17_At3g47580	94925	18	30.37	16	0.314012	0.293514	24.7539	25.1863	25.7783	25.4139	25.6541	25.5926
EBP1_ARATH	sp|Q96327|EBP1_ARATH ERBB-3 BINDING PROTEIN 1 OS=Arabidopsis thaliana OX=3702 GN=EBP1 PE=1 SV=1	EBP1	42979	30	72.19	28	0.313465	0.0508592	28.4061	28.2988	28.6427	28.7439	28.7947	28.7494
PLAS1_ARATH	sp|P11490|PLAS1_ARATH Plastocyanin minor isoform, chloroplastic OS=Arabidopsis thaliana OX=3702 GN=PETE PE=1 SV=2	PETE	17589	1	14.04	1	0.313421	0.171274	23.66	23.3745	23.2943	23.7888	23.4279	24.0523
TBB2_ARATH	sp|Q56YW9|TBB2_ARATH Tubulin beta-2 chain OS=Arabidopsis thaliana OX=3702 GN=TUBB2 PE=2 SV=2	TUBB2	50734	67	84.89	15	0.31272	0.0233743	29.055	29.104	29.1737	29.4114	29.3748	29.4847
UBC35_ARATH	sp|Q94A97|UBC35_ARATH Ubiquitin-conjugating enzyme E2 35 OS=Arabidopsis thaliana OX=3702 GN=UBC35 PE=1 SV=1	UBC35	17192	11	84.31	3	0.312139	0.217821	23.6087	23.1049	23.6406	23.8653	24.001	23.4243
PGKH2_ARATH	sp|P50318|PGKH2_ARATH Phosphoglycerate kinase 2, chloroplastic OS=Arabidopsis thaliana OX=3702 GN=At1g56190 PE=1 SV=3	At1g56190	49939	36	73.64	12	0.311581	0.0544495	27.6741	27.6867	27.7473	28.0673	28.1617	27.8138
A0A654E6K8_ARATH	tr|A0A654E6K8|A0A654E6K8_ARATH Peptidase A1 domain-containing protein OS=Arabidopsis thaliana OX=3702 GN=At1g03230 PE=3 SV=1	At1g03230	46148	17	46.77	14	0.311425	0.072913	26.8407	26.8784	26.9466	26.9525	27.3172	27.3302
TBA2_ARATH	sp|B9DGT7|TBA2_ARATH Tubulin alpha-2 chain OS=Arabidopsis thaliana OX=3702 GN=TUBA2 PE=2 SV=2	TUBA2	49541	57	97.33	3	0.311388	0.0578811	27.0408	27.2128	27.1504	27.6208	27.4369	27.2804
A0A384LG13_ARATH	tr|A0A384LG13|A0A384LG13_ARATH (thale cress) hypothetical protein OS=Arabidopsis thaliana OX=3702 GN=At3g04710 PE=4 SV=1	At3g04710	49259	3	12.5	3	0.311178	0.468054	21.6963	22.6662	22.4076	23.2576	22.0112	22.4349
DGK3_ARATH	sp|Q8VZG1|DGK3_ARATH Diacylglycerol kinase 3 OS=Arabidopsis thaliana OX=3702 GN=DGK3 PE=1 SV=1	DGK3	53881	11	35.04	9	0.310957	0.59531	24.9028	24.0384	24.8803	26.0388	24.6696	24.046
RBL2_ARATH	sp|Q9CAN1|RBL2_ARATH RHOMBOID-like protein 2 OS=Arabidopsis thaliana OX=3702 GN=RBL2 PE=1 SV=1	RBL2	35413	1	6.62	1	0.310848	0.135336	21.8587	21.6601	21.2679	21.984	21.7966	21.9388
A0A1P8APP8_ARATH	tr|A0A1P8APP8|A0A1P8APP8_ARATH CW7 OS=Arabidopsis thaliana OX=3702 GN=CW7 PE=1 SV=1	CW7	39447	2	7.08	2	0.310298	0.254885	22.3484	21.635	21.617	22.3324	22.2706	21.9283
NTF2_ARATH	sp|Q9FME2|NTF2_ARATH Nuclear transport factor 2 OS=Arabidopsis thaliana OX=3702 GN=NTF2 PE=1 SV=1	NTF2	49543	17	50.22	16	0.309638	0.0607386	27.1894	27.4118	27.3427	27.6723	27.4473	27.7533
MOCS3_ARATH	sp|Q9ZNW0|MOCS3_ARATH Adenylyltransferase and sulfurtransferase MOCS3 OS=Arabidopsis thaliana OX=3702 GN=MOCS3 PE=2 SV=1	MOCS3	50574	3	12.28	1	0.309366	0.170211	20.8033	20.8617	20.5413	20.7247	21.0505	21.3591
A0A7G2EF46_ARATH	tr|A0A7G2EF46|A0A7G2EF46_ARATH (thale cress) hypothetical protein OS=Arabidopsis thaliana OX=3702 GN=AT9943_LOCUS8773 PE=4 SV=1	AT9943_LOCUS8773	127482	21	15.45	1	0.308313	0.100899	24.3878	24.3443	24.663	24.5439	24.8895	24.8866
RS73_ARATH	sp|Q8LD03|RS73_ARATH 40S ribosomal protein S7-3 OS=Arabidopsis thaliana OX=3702 GN=RPS7C PE=1 SV=2	RPS7C	22061	26	66.84	25	0.307919	0.0188344	28.3351	28.362	28.317	28.6434	28.6325	28.662
KDSA2_ARATH	sp|Q6NQL4|KDSA2_ARATH 2-dehydro-3-deoxyphosphooctonate aldolase 2 OS=Arabidopsis thaliana OX=3702 GN=KDSA2 PE=1 SV=1	KDSA2	31676	11	43.64	5	0.307811	0.35702	24.0073	23.2617	23.9928	24.3192	23.5616	24.3045
KIN10_ARATH	sp|Q38997|KIN10_ARATH SNF1-related protein kinase catalytic subunit alpha KIN10 OS=Arabidopsis thaliana OX=3702 GN=KIN10 PE=1 SV=3	KIN10	58373	9	20.51	7	0.307279	0.42933	23.1532	23.8524	22.8295	23.4595	24.1388	23.1586
PSD3B_ARATH	sp|Q9LQR8|PSD3B_ARATH 26S proteasome non-ATPase regulatory subunit 3 homolog B OS=Arabidopsis thaliana OX=3702 GN=RPN3B PE=1 SV=2	RPN3B	55591	26	59.96	9	0.30664	0.220812	24.4642	24.7318	25.2149	25.2995	25.0875	24.9438
FKB62_ARATH	sp|Q38931|FKB62_ARATH Peptidyl-prolyl cis-trans isomerase FKBP62 OS=Arabidopsis thaliana OX=3702 GN=FKBP62 PE=1 SV=2	FKBP62	61453	24	50.45	23	0.306428	0.0511127	27.1668	27.4372	27.146	27.6099	27.5123	27.5471
RL131_ARATH	sp|P41127|RL131_ARATH 60S ribosomal protein L13-1 OS=Arabidopsis thaliana OX=3702 GN=RPL13B PE=1 SV=1	RPL13B	23767	18	58.74	18	0.306132	0.0490571	29.2908	29.4263	29.5509	29.6276	29.8291	29.7297
PS10B_ARATH	sp|Q9MAK9|PS10B_ARATH 26S proteasome regulatory subunit S10B homolog B OS=Arabidopsis thaliana OX=3702 GN=RPT4B PE=1 SV=1	RPT4B	44756	30	72.43	28	0.30607	0.0257928	28.1795	28.1981	28.2914	28.4985	28.4915	28.5972
LSM6A_ARATH	sp|Q9M1Z3|LSM6A_ARATH Sm-like protein LSM6A OS=Arabidopsis thaliana OX=3702 GN=LSM6A PE=1 SV=1	LSM6A	9913	1	8.79	1	0.305418	0.0912645	21.7266	21.8876	21.4289	22.0728	21.9494	21.9373
SSRA_ARATH	sp|P45434|SSRA_ARATH Translocon-associated protein subunit alpha OS=Arabidopsis thaliana OX=3702 GN=At2g21160 PE=2 SV=3	At2g21160	28167	4	17.83	4	0.305344	0.086383	25.9695	25.5773	25.9591	26.0796	26.1146	26.2278
2AAB_ARATH	sp|Q38950|2AAB_ARATH Serine/threonine-protein phosphatase 2A 65 kDa regulatory subunit A beta isoform OS=Arabidopsis thaliana OX=3702 GN=PP2AA2 PE=1 SV=2	PP2AA2	65598	26	60.82	21	0.305199	0.0456118	27.1909	27.088	27.1962	27.3354	27.6162	27.4392
A0A5S9YAR6_ARATH	tr|A0A5S9YAR6|A0A5S9YAR6_ARATH Uncharacterized protein OS=Arabidopsis thaliana OX=3702 GN=AN1_LOCUS24596 PE=4 SV=1	AN1_LOCUS24596	50726	8	21.32	8	0.304834	0.148767	26.3494	26.952	26.7304	27.1141	26.9101	26.9222
TIR1L_ARATH	sp|Q9LTX2|TIR1L_ARATH Transport inhibitor response 1-like protein OS=Arabidopsis thaliana OX=3702 GN=At5g49980 PE=2 SV=1	At5g49980	69317	5	14.86	5	0.302722	0.302969	24.1062	23.4381	24.1154	24.5257	23.8343	24.2078
BCAT3_ARATH	sp|Q9M401|BCAT3_ARATH Branched-chain-amino-acid aminotransferase 3, chloroplastic OS=Arabidopsis thaliana OX=3702 GN=BCAT3 PE=1 SV=1	BCAT3	44972	17	52.3	15	0.302478	0.0365565	26.4569	26.5684	26.5176	26.7843	26.9402	26.7258
RL51_ARATH	sp|Q8LBI1|RL51_ARATH 60S ribosomal protein L5-1 OS=Arabidopsis thaliana OX=3702 GN=RPL5A PE=1 SV=2	RPL5A	34358	24	61.13	4	0.302323	0.096044	26.9304	26.5829	26.8816	26.9216	27.145	27.2353
STT7_ARATH	sp|Q9S713|STT7_ARATH Serine/threonine-protein kinase STN7, chloroplastic OS=Arabidopsis thaliana OX=3702 GN=STN7 PE=1 SV=1	STN7	63252	16	32.74	15	0.302221	0.0462171	26.5927	26.6855	26.393	26.8334	26.89	26.8545
DPNP1_ARATH	sp|Q42546|DPNP1_ARATH SAL1 phosphatase OS=Arabidopsis thaliana OX=3702 GN=SAL1 PE=1 SV=1	SAL1	37564	17	77.34	16	0.301552	0.0529075	26.4746	26.7295	26.725	26.9893	26.9954	26.8491
THRC1_ARATH	sp|Q9S7B5|THRC1_ARATH Threonine synthase 1, chloroplastic OS=Arabidopsis thaliana OX=3702 GN=TS1 PE=1 SV=1	TS1	57777	28	60.84	22	0.301062	0.0281912	27.9752	27.9188	27.9378	28.3275	28.2464	28.1609
AB3F_ARATH	sp|Q8H0V6|AB3F_ARATH ABC transporter F family member 3 OS=Arabidopsis thaliana OX=3702 GN=ABCF3 PE=1 SV=1	ABCF3	79644	13	28.81	9	0.300846	0.335391	24.8006	23.9095	24.6992	24.7468	25.0593	24.5057
A0A178USE8_ARATH	tr|A0A178USE8|A0A178USE8_ARATH PSP domain-containing protein OS=Arabidopsis thaliana OX=3702 GN=AXX17_At4g25110 PE=4 SV=1	AXX17_At4g25110	72052	4	12.4	3	0.300177	0.423456	22.6116	22.9074	21.8035	22.3966	22.6488	23.1776
GCAL1_ARATH	sp|Q9FMV1|GCAL1_ARATH Gamma carbonic anhydrase-like 1, mitochondrial OS=Arabidopsis thaliana OX=3702 GN=GAMMACAL1 PE=1 SV=1	GAMMACAL1	27570	10	54.76	2	0.300076	0.473051	22.7141	22.1626	22.4704	21.9569	22.8737	23.4167
A0A384LA38_ARATH	tr|A0A384LA38|A0A384LA38_ARATH (thale cress) hypothetical protein OS=Arabidopsis thaliana OX=3702 GN=AXX17_At3g07450 PE=1 SV=1	AXX17_At3g07450	17602	4	29.56	4	0.299097	0.196023	24.7315	24.446	24.6863	25.1485	24.5243	25.0883
DRP1A_ARATH	sp|P42697|DRP1A_ARATH Phragmoplastin DRP1A OS=Arabidopsis thaliana OX=3702 GN=DRP1A PE=1 SV=3	DRP1A	68172	53	80.98	53	0.29907	0.0470575	28.584	28.5121	28.6469	29.0305	28.7729	28.8368
YIP4B_ARATH	sp|Q93VH1|YIP4B_ARATH Protein YIP4b OS=Arabidopsis thaliana OX=3702 GN=YIP4B PE=1 SV=1	YIP4B	30220	2	15.36	2	0.298368	0.370792	23.1955	23.3519	23.6978	23.1199	23.8128	24.2076
ACO1_ARATH	sp|Q42560|ACO1_ARATH Aconitate hydratase 1 OS=Arabidopsis thaliana OX=3702 GN=ACO1 PE=1 SV=2	ACO1	98152	71	71.71	69	0.297956	0.0264973	30.1649	30.1094	30.2126	30.4538	30.5149	30.4121
A0A7G2DS91_ARATH	tr|A0A7G2DS91|A0A7G2DS91_ARATH (thale cress) hypothetical protein OS=Arabidopsis thaliana OX=3702 GN=AT9943_LOCUS1053 PE=3 SV=1	AT9943_LOCUS1053	220041	17	10.98	13	0.29757	0.755346	24.1221	23.8603	26.8383	26.2791	24.7776	24.6568
A0A178WA32_ARATH	tr|A0A178WA32|A0A178WA32_ARATH Eukaryotic translation initiation factor 5B OS=Arabidopsis thaliana OX=3702 GN=AXX17_At1g71320 PE=4 SV=1	AXX17_At1g71320	142147	13	17.16	13	0.29735	0.237214	24.4421	24.912	25.2883	25.1696	25.2151	25.1497
PDI14_ARATH	sp|Q9FF55|PDI14_ARATH Protein disulfide isomerase-like 1-4 OS=Arabidopsis thaliana OX=3702 GN=PDIL1-4 PE=1 SV=1	PDIL1-4	66357	31	51.93	30	0.296332	0.0656847	28.4485	28.4	28.2853	28.8569	28.5257	28.6402
SC24A_ARATH	sp|Q9SFU0|SC24A_ARATH Protein transport protein Sec24-like At3g07100 OS=Arabidopsis thaliana OX=3702 GN=At3g07100 PE=2 SV=2	At3g07100	113960	31	34.78	29	0.295149	0.0836578	27.2474	27.2853	26.9711	27.3378	27.6068	27.4446
GGP1_ARATH	sp|Q9M0A7|GGP1_ARATH Gamma-glutamyl peptidase 1 OS=Arabidopsis thaliana OX=3702 GN=GGP1 PE=1 SV=1	GGP1	28385	20	75.6	20	0.2949	0.081895	27.892	28.1456	28.2803	28.4112	28.3096	28.4818
VATF_ARATH	sp|Q9ZQX4|VATF_ARATH V-type proton ATPase subunit F OS=Arabidopsis thaliana OX=3702 GN=VHA-F PE=2 SV=1	VHA-F	14259	7	53.12	7	0.294271	0.565858	27.6854	27.6514	26.3885	26.7855	27.8976	27.925
A0A178UAG3_ARATH	tr|A0A178UAG3|A0A178UAG3_ARATH (thale cress) hypothetical protein OS=Arabidopsis thaliana OX=3702 GN=AXX17_At5g34440 PE=4 SV=1	AXX17_At5g34440	33425	6	23.3	6	0.293884	0.0594089	24.9788	25.17	24.8281	25.2721	25.2991	25.2874
RH15_ARATH	sp|Q56XG6|RH15_ARATH DEAD-box ATP-dependent RNA helicase 15 OS=Arabidopsis thaliana OX=3702 GN=RH15 PE=1 SV=3	RH15	48337	32	80.56	28	0.293659	0.0410941	28.5091	28.6146	28.635	28.7664	28.8965	28.9767
A0A178UJP6_ARATH	tr|A0A178UJP6|A0A178UJP6_ARATH BRISC and BRCA1-A complex member 2 OS=Arabidopsis thaliana OX=3702 GN=AXX17_At5g40330 PE=3 SV=1	AXX17_At5g40330	44130	4	17.28	2	0.293001	0.331143	22.469	21.6062	21.7917	22.5663	21.9973	22.1824
A0A7G2F4Q9_ARATH	tr|A0A7G2F4Q9|A0A7G2F4Q9_ARATH Glucan endo-1,3-beta-D-glucosidase OS=Arabidopsis thaliana OX=3702 GN=AT9943_LOCUS17501 PE=3 SV=1	AT9943_LOCUS17501	155412	34	28.89	5	0.292899	0.0813428	24.7522	24.4537	24.7438	24.8978	25.0853	24.8452
BGL38_ARATH	sp|P37702|BGL38_ARATH Myrosinase 1 OS=Arabidopsis thaliana OX=3702 GN=TGG1 PE=1 SV=1	TGG1	61133	42	53.23	39	0.292884	0.0489364	30.928	30.9848	30.8532	31.1502	31.1291	31.3653
RAH1B_ARATH	sp|O80501|RAH1B_ARATH Ras-related protein RABH1b OS=Arabidopsis thaliana OX=3702 GN=RABH1B PE=1 SV=1	RABH1B	23130	16	60.1	13	0.292654	0.0669533	27.5718	27.3415	27.3162	27.6446	27.6217	27.8412
RL321_ARATH	sp|P49211|RL321_ARATH 60S ribosomal protein L32-1 OS=Arabidopsis thaliana OX=3702 GN=RPL32A PE=2 SV=2	RPL32A	15503	13	50.38	13	0.29262	0.123883	27.8149	28.3056	28.0247	28.2082	28.4486	28.3662
AP2A2_ARATH	sp|Q8LPK4|AP2A2_ARATH AP-2 complex subunit alpha-2 OS=Arabidopsis thaliana OX=3702 GN=ALPHAC-AD PE=1 SV=1	ALPHAC-AD	112299	44	54.49	38	0.292476	0.0525311	27.2796	27.2667	27.4734	27.5334	27.6257	27.7381
RH12_ARATH	sp|Q9M2E0|RH12_ARATH DEAD-box ATP-dependent RNA helicase 12 OS=Arabidopsis thaliana OX=3702 GN=RH12 PE=2 SV=1	RH12	56775	15	36.55	13	0.292384	0.0701429	26.0106	26.3381	26.032	26.4757	26.4156	26.3666
A0A7G2EHD2_ARATH	tr|A0A7G2EHD2|A0A7G2EHD2_ARATH (thale cress) hypothetical protein OS=Arabidopsis thaliana OX=3702 GN=AT9943_LOCUS8474 PE=3 SV=1	AT9943_LOCUS8474	49108	28	57.47	24	0.291241	0.0374349	28.8262	28.9214	28.9464	29.2106	29.0903	29.2668
A0A178WCE4_ARATH	tr|A0A178WCE4|A0A178WCE4_ARATH Uncharacterized protein OS=Arabidopsis thaliana OX=3702 GN=At1g42960 PE=4 SV=1	At1g42960	17829	4	27.38	3	0.291074	0.109687	25.4556	25.3475	25.8093	25.7541	25.904	25.8276
MFP2_ARATH	sp|Q9ZPI5|MFP2_ARATH Peroxisomal fatty acid beta-oxidation multifunctional protein MFP2 OS=Arabidopsis thaliana OX=3702 GN=MFP2 PE=1 SV=1	MFP2	78840	24	40.69	24	0.290894	0.112038	26.9659	26.6125	26.785	27.0671	26.8996	27.2694
A0A654FDN1_ARATH	tr|A0A654FDN1|A0A654FDN1_ARATH Hydrolase_4 domain-containing protein OS=Arabidopsis thaliana OX=3702 GN=At3g47590 PE=4 SV=1	At3g47590	35049	11	48.87	10	0.290837	0.07508	25.9094	25.9299	26.1927	26.4359	26.2615	26.2071
GCST_ARATH	sp|O65396|GCST_ARATH Aminomethyltransferase, mitochondrial OS=Arabidopsis thaliana OX=3702 GN=GDCST PE=2 SV=1	GDCST	44445	48	79.9	44	0.290643	0.0286524	30.7079	30.6686	30.7789	30.9591	31.0358	31.0325
PNSB4_ARATH	sp|Q8RXS1|PNSB4_ARATH Photosynthetic NDH subunit of subcomplex B 4, chloroplastic OS=Arabidopsis thaliana OX=3702 GN=PNSB4 PE=2 SV=1	PNSB4	20396	1	8.57	1	0.290004	0.258173	22.2454	22.5591	21.7633	22.4939	22.2952	22.6488
RLA12_ARATH	sp|O23095|RLA12_ARATH 60S acidic ribosomal protein P1-2 OS=Arabidopsis thaliana OX=3702 GN=RPP1B PE=1 SV=2	RPP1B	11307	1	14.16	1	0.28968	0.280559	21.7127	22.1938	21.9868	22.6976	22.1384	21.9264
Q9SRL6_ARATH	tr|Q9SRL6|Q9SRL6_ARATH Outer membrane OMP85 family protein OS=Arabidopsis thaliana OX=3702 GN=F9F8.12 PE=1 SV=1	F9F8.12	57209	8	16.35	6	0.289638	0.0900234	23.9124	24.0505	23.6739	24.2574	24.2067	24.0416
A0A178UVJ8_ARATH	tr|A0A178UVJ8|A0A178UVJ8_ARATH Uncharacterized protein OS=Arabidopsis thaliana OX=3702 GN=AXX17_At4g28200 PE=4 SV=1	AXX17_At4g28200	53981	10	28.66	8	0.289001	0.356411	25.111	24.9101	24.1062	25.2003	24.9795	24.8145
A0A178UTX9_ARATH	tr|A0A178UTX9|A0A178UTX9_ARATH Peptidase_S9 domain-containing protein OS=Arabidopsis thaliana OX=3702 GN=At5g36210 PE=4 SV=1	At5g36210	75211	24	38.91	22	0.288415	0.115222	26.6252	26.4516	26.9105	27.0698	26.933	26.8498
GSTUR_ARATH	sp|Q9LZG7|GSTUR_ARATH Glutathione S-transferase U27 OS=Arabidopsis thaliana OX=3702 GN=GSTU27 PE=2 SV=1	GSTU27	26761	4	20.7	4	0.288004	0.437274	23.3169	23.1751	22.3634	22.716	23.5716	23.4319
NADA_ARATH	sp|Q9FGS4|NADA_ARATH Quinolinate synthase, chloroplastic OS=Arabidopsis thaliana OX=3702 GN=QS PE=1 SV=1	QS	78934	8	17.27	6	0.287675	0.533005	23.3289	22.8526	23.2133	23.6518	24.1224	22.4836
PABP2_ARATH	sp|P42731|PABP2_ARATH Polyadenylate-binding protein 2 OS=Arabidopsis thaliana OX=3702 GN=PAB2 PE=1 SV=1	PAB2	68672	26	49.44	24	0.287427	0.105475	27.8677	27.5458	27.7592	28.13	28.0979	27.8071
PERK1_ARATH	sp|Q9LV48|PERK1_ARATH Proline-rich receptor-like protein kinase PERK1 OS=Arabidopsis thaliana OX=3702 GN=PERK1 PE=1 SV=1	PERK1	69272	10	21.78	8	0.286171	0.369413	24.5088	24.6182	24.0997	24.2701	24.5552	25.2599
A0A178V7L9_ARATH	tr|A0A178V7L9|A0A178V7L9_ARATH Uncharacterized protein OS=Arabidopsis thaliana OX=3702 GN=AXX17_At3g42170 PE=4 SV=1	AXX17_At3g42170	14383	6	32.28	6	0.28595	0.0741244	26.1371	26.1467	26.3649	26.5661	26.5981	26.3424
SMC3_ARATH	sp|Q56YN8|SMC3_ARATH Structural maintenance of chromosomes protein 3 OS=Arabidopsis thaliana OX=3702 GN=SMC3 PE=2 SV=1	SMC3	139371	5	5.81	2	0.285948	0.32178	25.7162	25.9698	26.1107	26.7085	26.177	25.769
MSRA2_ARATH	sp|Q9LY15|MSRA2_ARATH Peptide methionine sulfoxide reductase A2 OS=Arabidopsis thaliana OX=3702 GN=MRSA2 PE=1 SV=1	MRSA2	24434	12	55.5	12	0.28565	0.145618	27.2435	27.6712	27.5133	27.9788	27.7155	27.5906
MOC2B_ARATH	sp|O22827|MOC2B_ARATH Molybdopterin synthase catalytic subunit OS=Arabidopsis thaliana OX=3702 GN=MOCS2 PE=2 SV=1	MOCS2	22216	6	37.88	4	0.285588	0.0823447	23.7392	23.763	24.0517	24.228	24.0214	24.1613
KPPR_ARATH	sp|P25697|KPPR_ARATH Phosphoribulokinase, chloroplastic OS=Arabidopsis thaliana OX=3702 GN=At1g32060 PE=1 SV=1	At1g32060	44464	31	71.39	29	0.285232	0.0285343	30.5615	30.4781	30.5273	30.8222	30.7628	30.8377
SCRK1_ARATH	sp|Q9SID0|SCRK1_ARATH Probable fructokinase-1 OS=Arabidopsis thaliana OX=3702 GN=At2g31390 PE=2 SV=1	At2g31390	35275	34	77.85	32	0.28501	0.0357862	29.8071	29.867	29.9655	30.2085	30.1118	30.1743
GSTUG_ARATH	sp|Q9XIF8|GSTUG_ARATH Glutathione S-transferase U16 OS=Arabidopsis thaliana OX=3702 GN=GSTU16 PE=2 SV=1	GSTU16	26506	7	46.15	5	0.283494	0.397639	23.9227	23.2149	24.075	23.5692	24.3622	24.1316
ATPG3_ARATH	sp|Q96250|ATPG3_ARATH ATP synthase subunit gamma, mitochondrial OS=Arabidopsis thaliana OX=3702 GN=ATPC PE=1 SV=1	ATPC	35448	23	58.77	20	0.282843	0.205434	28.658	28.968	28.7409	29.2156	28.7003	29.2996
RBP1B_ARATH	sp|Q8RWG8|RBP1B_ARATH Ran-binding protein 1 homolog b OS=Arabidopsis thaliana OX=3702 GN=RANBP1B PE=1 SV=2	RANBP1B	24389	9	60.37	7	0.282818	0.504269	26.0138	24.5576	25.6586	25.4311	25.7045	25.9429
MAM1_ARATH	sp|Q9FG67|MAM1_ARATH Methylthioalkylmalate synthase 1, chloroplastic OS=Arabidopsis thaliana OX=3702 GN=MAM1 PE=1 SV=1	MAM1	55125	30	69.37	27	0.2828	0.112482	28.6202	28.8629	29.1077	29.1747	29.1429	29.1216
MDHNP_ARATH	sp|Q8H1E2|MDHNP_ARATH Malate dehydrogenase [NADP], chloroplastic OS=Arabidopsis thaliana OX=3702 GN=At5g58330 PE=2 SV=1	At5g58330	48316	26	60.95	26	0.282533	0.0636939	28.8211	28.8374	28.7227	28.9358	29.0535	29.2395
A0A178WAV2_ARATH	tr|A0A178WAV2|A0A178WAV2_ARATH Uncharacterized protein OS=Arabidopsis thaliana OX=3702 GN=AXX17_At1g28530 PE=4 SV=1	AXX17_At1g28530	30245	3	9.29	3	0.282014	0.728335	23.3166	23.465	21.7326	23.857	23.8519	21.6515
A0A178V2M7_ARATH	tr|A0A178V2M7|A0A178V2M7_ARATH NIG OS=Arabidopsis thaliana OX=3702 GN=At4g13350 PE=1 SV=1	At4g13350	65027	6	14.45	6	0.281959	0.102284	24.743	24.6652	24.9803	25.1974	24.8958	25.1411
CYSKM_ARATH	sp|Q43725|CYSKM_ARATH Cysteine synthase, mitochondrial OS=Arabidopsis thaliana OX=3702 GN=OASC PE=1 SV=3	OASC	45815	23	56.74	17	0.281383	0.0801995	27.8475	27.615	27.7105	28.041	28.1399	27.8362
Q9STT3_ARATH	tr|Q9STT3|Q9STT3_ARATH Aldose 1-epimerase OS=Arabidopsis thaliana OX=3702 GN=T23J7.130 PE=1 SV=1	T23J7.130	39715	13	47.21	11	0.281273	0.109812	26.9113	26.461	26.678	26.9643	26.8838	27.046
A0A1P8AW81_ARATH	tr|A0A1P8AW81|A0A1P8AW81_ARATH Prolyl endopeptidase OS=Arabidopsis thaliana OX=3702 GN=At1g69020 PE=1 SV=1	At1g69020	89534	1	1.01	1	0.280932	0.320104	23.3857	23.1908	22.6583	22.9878	23.4814	23.6084
IF4A1_ARATH	sp|P41376|IF4A1_ARATH Eukaryotic initiation factor 4A-1 OS=Arabidopsis thaliana OX=3702 GN=EIF4A1 PE=1 SV=1	EIF4A1	46704	50	90.29	44	0.280864	0.223616	30.367	30.4995	30.4628	30.5324	31.1551	30.4844
SUMO1_ARATH	sp|P55852|SUMO1_ARATH Small ubiquitin-related modifier 1 OS=Arabidopsis thaliana OX=3702 GN=SUMO1 PE=1 SV=2	SUMO1	10976	5	56	5	0.280279	0.113066	24.9639	24.5316	24.9128	25.1174	25.1116	25.0201
U73B5_ARATH	sp|Q9ZQG4|U73B5_ARATH UDP-glycosyltransferase 73B5 OS=Arabidopsis thaliana OX=3702 GN=UGT73B5 PE=2 SV=1	UGT73B5	54184	1	3.51	1	0.279534	0.206861	20.8648	20.3264	20.8973	20.8274	20.9548	21.1449
A0A178WEB6_ARATH	tr|A0A178WEB6|A0A178WEB6_ARATH GrpE protein homolog OS=Arabidopsis thaliana OX=3702 GN=AXX17_At1g37100 PE=3 SV=1	AXX17_At1g37100	31250	4	17.92	2	0.279422	0.562125	21.7701	23.1329	22.6724	23.0226	23.2751	22.1159
2AAA_ARATH	sp|Q38845|2AAA_ARATH Serine/threonine-protein phosphatase 2A 65 kDa regulatory subunit A alpha isoform OS=Arabidopsis thaliana OX=3702 GN=PP2AA1 PE=1 SV=1	PP2AA1	65494	26	53.06	22	0.279236	0.066702	27.6111	27.3624	27.6109	27.7691	27.7487	27.9042
CALX1_ARATH	sp|P29402|CALX1_ARATH Calnexin homolog 1 OS=Arabidopsis thaliana OX=3702 GN=CNX1 PE=1 SV=1	CNX1	60486	34	56.23	32	0.278625	0.0391915	28.9178	28.9208	28.8126	29.1658	29.0878	29.2335
SC31B_ARATH	sp|Q8L611|SC31B_ARATH Protein transport protein SEC31 homolog B OS=Arabidopsis thaliana OX=3702 GN=SEC31B PE=1 SV=1	SEC31B	119875	42	52.36	37	0.278422	0.0326171	28.7514	28.7842	28.67	28.9798	29.0229	29.0381
KING1_ARATH	sp|Q8LBB2|KING1_ARATH SNF1-related protein kinase regulatory subunit gamma-1 OS=Arabidopsis thaliana OX=3702 GN=KING1 PE=1 SV=2	KING1	47423	16	55.42	14	0.278022	0.174789	25.9949	26.1371	26.1914	26.0511	26.4721	26.6343
MSBP1_ARATH	sp|Q9XFM6|MSBP1_ARATH Membrane steroid-binding protein 1 OS=Arabidopsis thaliana OX=3702 GN=MSBP1 PE=1 SV=2	MSBP1	24405	10	79.55	9	0.277768	0.0824719	26.2788	26.1169	26.0484	26.5515	26.4694	26.2566
NDHN_ARATH	sp|Q9LVM2|NDHN_ARATH NAD(P)H-quinone oxidoreductase subunit N, chloroplastic OS=Arabidopsis thaliana OX=3702 GN=ndhN PE=2 SV=1	ndhN	23398	6	33.49	4	0.277452	0.684673	24.0675	24.2014	21.9096	23.7047	24.0055	23.3006
UGPI4_ARATH	sp|Q84MC0|UGPI4_ARATH Uncharacterized GPI-anchored protein At3g06035 OS=Arabidopsis thaliana OX=3702 GN=At3g06035 PE=2 SV=1	At3g06035	22053	3	13.5	3	0.277134	0.465798	23.7354	25.0912	24.503	24.6592	24.9507	24.5512
A0A178V7C0_ARATH	tr|A0A178V7C0|A0A178V7C0_ARATH Mannose-1-phosphate guanylyltransferase OS=Arabidopsis thaliana OX=3702 GN=At3g55600 PE=3 SV=1	At3g55600	72002	7	13.8	2	0.276723	0.201689	20.8302	20.855	20.9189	20.8519	21.5242	21.0582
UGPA2_ARATH	sp|Q9M9P3|UGPA2_ARATH UTP--glucose-1-phosphate uridylyltransferase 2 OS=Arabidopsis thaliana OX=3702 GN=UGP2 PE=1 SV=1	UGP2	51738	47	78.25	45	0.276255	0.0291838	30.2226	30.2495	30.2588	30.5311	30.4864	30.5421
2ABA_ARATH	sp|Q38821|2ABA_ARATH Serine/threonine protein phosphatase 2A 55 kDa regulatory subunit B alpha isoform OS=Arabidopsis thaliana OX=3702 GN=PP2AB1 PE=1 SV=2	PP2AB1	56935	12	35.28	11	0.276212	0.204922	24.5699	24.7114	25.1501	24.8894	25.2311	25.1396
OPLA_ARATH	sp|Q9FIZ7|OPLA_ARATH 5-oxoprolinase 1 OS=Arabidopsis thaliana OX=3702 GN=OXP1 PE=1 SV=1	OXP1	137531	37	35.55	33	0.276104	0.0434048	26.645	26.8235	26.6463	27.0066	26.9594	26.9772
A0A7G2EYL9_ARATH	tr|A0A7G2EYL9|A0A7G2EYL9_ARATH (thale cress) hypothetical protein OS=Arabidopsis thaliana OX=3702 GN=AT9943_LOCUS15162 PE=4 SV=1	AT9943_LOCUS15162	108185	8	12.53	7	0.275625	0.629794	22.5195	24.2452	24.3575	24.0991	24.3193	23.5307
Q9FW48_ARATH	tr|Q9FW48|Q9FW48_ARATH Leucine-rich repeat (LRR) family protein OS=Arabidopsis thaliana OX=3702 GN=At1g33600 PE=1 SV=1	At1g33600	52471	14	37.66	13	0.275431	0.204147	26.292	25.6648	26.1313	26.1642	26.3587	26.3916
A0A178UJS3_ARATH	tr|A0A178UJS3|A0A178UJS3_ARATH (thale cress) hypothetical protein OS=Arabidopsis thaliana OX=3702 GN=At5g66920 PE=3 SV=1	At5g66920	60820	5	10.99	5	0.275139	0.677913	24.5304	23.1713	24.5463	23.2057	24.7074	25.1603
RLPH2_ARATH	sp|Q9SR62|RLPH2_ARATH Tyrosine-protein phosphatase RLPH2 OS=Arabidopsis thaliana OX=3702 GN=RLPH2 PE=1 SV=1	RLPH2	34425	1	7.44	1	0.274823	0.136126	20.7301	20.5695	21.0549	20.9693	21.0497	21.16
A0A178W963_ARATH	tr|A0A178W963|A0A178W963_ARATH tRNA_edit domain-containing protein OS=Arabidopsis thaliana OX=3702 GN=AXX17_At1g40520 PE=3 SV=1	AXX17_At1g40520	33771	5	22.8	5	0.274478	0.347917	23.4517	23.7074	24.1669	23.6451	24.389	24.1153
SYDC2_ARATH	sp|Q9M084|SYDC2_ARATH Aspartate--tRNA ligase 2, cytoplasmic OS=Arabidopsis thaliana OX=3702 GN=IBI1 PE=1 SV=1	IBI1	62918	31	58.6	27	0.274419	0.0535596	27.2864	27.4015	27.4896	27.6848	27.5773	27.7386
PER17_ARATH	sp|Q9SJZ2|PER17_ARATH Peroxidase 17 OS=Arabidopsis thaliana OX=3702 GN=PER17 PE=2 SV=1	PER17	36670	9	34.65	6	0.274221	0.147551	24.7522	24.652	25.0316	25.306	24.9246	25.0278
AIGLB_ARATH	sp|Q9FIX1|AIGLB_ARATH AIG2-like protein B OS=Arabidopsis thaliana OX=3702 GN=AIG2LB PE=1 SV=1	AIG2LB	20018	9	67.44	8	0.273846	0.382023	25.7813	26.138	25.5099	26.5232	25.5833	26.1443
A0A178VNL2_ARATH	tr|A0A178VNL2|A0A178VNL2_ARATH Uncharacterized protein OS=Arabidopsis thaliana OX=3702 GN=At2g35830 PE=4 SV=1	At2g35830	20890	4	40.74	2	0.273678	0.544266	21.9094	21.3523	22.3214	22.5673	21.3158	22.521
PSD3_ARATH	sp|A4GNA8|PSD3_ARATH Phosphatidylserine decarboxylase proenzyme 3 OS=Arabidopsis thaliana OX=3702 GN=PSD3 PE=1 SV=1	PSD3	70352	19	35.28	17	0.273499	0.043125	26.6663	26.7465	26.8313	26.9656	27.0204	27.0786
PAE12_ARATH	sp|Q9SFF6|PAE12_ARATH Pectin acetylesterase 12 OS=Arabidopsis thaliana OX=3702 GN=PAE12 PE=2 SV=1	PAE12	46327	10	38.07	6	0.272877	0.443013	23.6842	24.1647	23.2102	23.4385	24.2838	24.1554
A0A654ETX8_ARATH	tr|A0A654ETX8|A0A654ETX8_ARATH SH3 domain-containing protein OS=Arabidopsis thaliana OX=3702 GN=At2g07360 PE=4 SV=1	At2g07360	129466	24	26.49	22	0.272667	0.0556367	25.9562	26.08	26.1824	26.3114	26.4262	26.299
RL142_ARATH	sp|Q9T043|RL142_ARATH 60S ribosomal protein L14-2 OS=Arabidopsis thaliana OX=3702 GN=RPL14B PE=1 SV=1	RPL14B	15505	18	61.94	18	0.272361	0.0407484	29.3244	29.4454	29.3969	29.6926	29.7056	29.5856
HSOP1_ARATH	sp|Q9LNB6|HSOP1_ARATH Hsp70-Hsp90 organizing protein 1 OS=Arabidopsis thaliana OX=3702 GN=HOP1 PE=2 SV=1	HOP1	64585	20	48.6	14	0.27225	0.234492	25.8257	25.5982	25.4412	26.1213	26.0389	25.5217
A0A654FDQ5_ARATH	tr|A0A654FDQ5|A0A654FDQ5_ARATH (thale cress) hypothetical protein OS=Arabidopsis thaliana OX=3702 GN=AN1_LOCUS13250 PE=4 SV=1	AN1_LOCUS13250	20032	5	39.43	5	0.272119	0.751329	21.7015	23.1018	24.6143	22.7399	23.1219	24.3721
A0A178WMY0_ARATH	tr|A0A178WMY0|A0A178WMY0_ARATH Alba domain-containing protein OS=Arabidopsis thaliana OX=3702 GN=AXX17_At1g70450 PE=4 SV=1	AXX17_At1g70450	37364	10	26	9	0.272032	0.0379968	26.0106	25.9491	26.0761	26.319	26.2325	26.3003
U548_ARATH	sp|Q8GXB1|U548_ARATH UPF0548 protein At2g17695 OS=Arabidopsis thaliana OX=3702 GN=At2g17695 PE=2 SV=1	At2g17695	23245	8	44.39	7	0.271863	0.443442	25.4949	25.4139	24.3182	25.3211	25.3735	25.348
LIL31_ARATH	sp|Q9SYX1|LIL31_ARATH Light-harvesting complex-like protein 3 isotype 1, chloroplastic OS=Arabidopsis thaliana OX=3702 GN=LIL3.1 PE=1 SV=1	LIL3.1	29403	2	13.36	2	0.271663	0.506018	22.5674	22.9433	21.6418	22.5491	22.3382	23.0802
AB1B_ARATH	sp|Q9ZR72|AB1B_ARATH ABC transporter B family member 1 OS=Arabidopsis thaliana OX=3702 GN=ABCB1 PE=1 SV=1	ABCB1	140573	9	9.18	7	0.271481	0.599023	24.1427	23.4192	22.189	23.6558	23.4507	23.459
P5CS1_ARATH	sp|P54887|P5CS1_ARATH Delta-1-pyrroline-5-carboxylate synthase A OS=Arabidopsis thaliana OX=3702 GN=P5CSA PE=1 SV=1	P5CSA	77702	14	26.36	13	0.271008	0.137769	25.9969	25.8617	25.7521	26.402	25.9622	26.0595
MO2_ARATH	sp|O81816|MO2_ARATH Monooxygenase 2 OS=Arabidopsis thaliana OX=3702 GN=MO2 PE=2 SV=1	MO2	45505	7	20.39	6	0.270965	0.497622	23.4292	22.1106	22.9109	22.785	23.4763	23.0022
RU2B1_ARATH	sp|O22922|RU2B1_ARATH U2 small nuclear ribonucleoprotein B'' OS=Arabidopsis thaliana OX=3702 GN=U2B'' PE=1 SV=1	U2B''	26237	4	17.67	4	0.270965	0.716956	23.8483	22.2677	23.9169	22.3503	24.519	23.9765
NU2M_ARATH	sp|O05000|NU2M_ARATH NADH-ubiquinone oxidoreductase chain 2 OS=Arabidopsis thaliana OX=3702 GN=ND2 PE=1 SV=2	ND2	55450	2	4.01	2	0.27095	0.549991	22.9177	22.2197	22.0943	23.204	23.0085	21.8321
HEM61_ARATH	sp|Q9LR75|HEM61_ARATH Coproporphyrinogen-III oxidase 1, chloroplastic OS=Arabidopsis thaliana OX=3702 GN=CPX1 PE=2 SV=1	CPX1	43796	23	69.69	22	0.270489	0.0699536	28.1604	28.2163	28.0181	28.5436	28.3454	28.3173
MPCP3_ARATH	sp|Q9FMU6|MPCP3_ARATH Mitochondrial phosphate carrier protein 3, mitochondrial OS=Arabidopsis thaliana OX=3702 GN=MPT3 PE=1 SV=1	MPT3	40090	33	53.07	31	0.270128	0.129684	30.0885	30.1315	29.7429	30.255	30.1286	30.3897
A0A384K8P2_ARATH	tr|A0A384K8P2|A0A384K8P2_ARATH CTP synthase OS=Arabidopsis thaliana OX=3702 GN=AXX17_At3g12710 PE=3 SV=1	AXX17_At3g12710	64304	2	4.57	1	0.270109	0.244641	22.412	23.0095	22.4822	22.7598	22.8137	23.1406
A0A178V5J1_ARATH	tr|A0A178V5J1|A0A178V5J1_ARATH Uncharacterized protein OS=Arabidopsis thaliana OX=3702 GN=At4g26210 PE=3 SV=1	At4g26210	13869	1	9.02	1	0.269717	0.157653	21.831	21.9872	21.7209	21.991	21.9527	22.4046
KPRS5_ARATH	sp|O64888|KPRS5_ARATH Ribose-phosphate pyrophosphokinase 5, chloroplastic OS=Arabidopsis thaliana OX=3702 GN=PRS5 PE=2 SV=2	PRS5	42625	11	51.02	7	0.268696	0.413136	25.0647	24.8635	25.1933	24.6494	25.7274	25.5509
NUA_ARATH	sp|A4GSN8|NUA_ARATH Nuclear-pore anchor OS=Arabidopsis thaliana OX=3702 GN=NUA PE=1 SV=1	NUA	237040	17	10.94	15	0.267981	0.273314	24.4911	24.031	24.6071	24.4535	24.9696	24.51
A0A178UT81_ARATH	tr|A0A178UT81|A0A178UT81_ARATH Carbonic anhydrase OS=Arabidopsis thaliana OX=3702 GN=At5g14740 PE=3 SV=1	At5g14740	28344	35	94.59	34	0.267629	0.11282	31.3835	31.4037	31.0069	31.5282	31.5452	31.5236
GPX1_ARATH	sp|P52032|GPX1_ARATH Phospholipid hydroperoxide glutathione peroxidase 1, chloroplastic OS=Arabidopsis thaliana OX=3702 GN=GPX1 PE=2 SV=2	GPX1	26016	14	56.78	14	0.267576	0.249659	26.8175	26.4783	26.3909	26.6958	26.6038	27.1898
A0A178U9L8_ARATH	tr|A0A178U9L8|A0A178U9L8_ARATH Eukaryotic translation initiation factor 3 subunit L OS=Arabidopsis thaliana OX=3702 GN=AXX17_At5g25710 PE=1 SV=1	AXX17_At5g25710	60183	22	54.86	19	0.267119	0.151589	26.6107	26.5154	26.81	27.0229	27.0638	26.6509
BAM3_ARATH	sp|O23553|BAM3_ARATH Beta-amylase 3, chloroplastic OS=Arabidopsis thaliana OX=3702 GN=BAM3 PE=1 SV=3	BAM3	61353	14	35.77	14	0.264868	0.268169	25.3445	25.9091	25.5697	25.7573	26.1994	25.6612
MRF1_ARATH	sp|Q94BR1|MRF1_ARATH MA3 DOMAIN-CONTAINING TRANSLATION REGULATORY FACTOR 1 OS=Arabidopsis thaliana OX=3702 GN=MRF1 PE=1 SV=1	MRF1	77556	14	29.63	8	0.264172	0.368351	23.7721	23.8407	24.4271	24.3217	23.8724	24.6383
Q8L8X0_ARATH	tr|Q8L8X0|Q8L8X0_ARATH GAST1-like protein OS=Arabidopsis thaliana OX=3702 PE=2 SV=1		10798	3	24.49	3	0.264076	0.609293	21.4364	23.0256	21.2757	21.9022	22.3093	22.3184
A0A178UUK6_ARATH	tr|A0A178UUK6|A0A178UUK6_ARATH (thale cress) hypothetical protein OS=Arabidopsis thaliana OX=3702 GN=AXX17_At4g34060 PE=4 SV=1	AXX17_At4g34060	54651	15	40.52	14	0.263675	0.0563321	27.5338	27.6741	27.4742	27.8731	27.753	27.847
METC_ARATH	sp|P53780|METC_ARATH Cystathionine beta-lyase, chloroplastic OS=Arabidopsis thaliana OX=3702 GN=At3g57050 PE=1 SV=1	At3g57050	50430	18	46.55	17	0.263488	0.084172	26.8649	26.9863	27.1141	27.2234	27.3864	27.146
COQ5_ARATH	sp|Q9LVC8|COQ5_ARATH 2-methoxy-6-polyprenyl-1,4-benzoquinol methylase, mitochondrial OS=Arabidopsis thaliana OX=3702 GN=COQ5 PE=2 SV=1	COQ5	32290	1	5.21	1	0.26323	0.559462	20.5983	22.0589	22.0805	21.9835	21.837	21.7069
PER33_ARATH	sp|P24101|PER33_ARATH Peroxidase 33 OS=Arabidopsis thaliana OX=3702 GN=PER33 PE=1 SV=1	PER33	38941	10	31.07	3	0.262709	0.444481	24.3961	24.7208	23.8805	24.3316	25.1416	24.3123
XYL1_ARATH	sp|Q9S7Y7|XYL1_ARATH Alpha-xylosidase 1 OS=Arabidopsis thaliana OX=3702 GN=XYL1 PE=1 SV=1	XYL1	102399	44	54.75	43	0.262477	0.0482496	29.2771	29.3095	29.192	29.6068	29.4651	29.4942
A0A178UII7_ARATH	tr|A0A178UII7|A0A178UII7_ARATH Uncharacterized protein OS=Arabidopsis thaliana OX=3702 GN=AXX17_At5g40660 PE=4 SV=1	AXX17_At5g40660	25099	4	35.37	3	0.26229	0.100853	24.9337	24.9523	25.0627	25.2959	25.0387	25.4009
Y3868_ARATH	sp|Q9C9Y8|Y3868_ARATH Probable inactive receptor kinase At3g08680 OS=Arabidopsis thaliana OX=3702 GN=At3g08680 PE=1 SV=1	At3g08680	69406	1	1.72	1	0.261878	0.333405	20.233	20.9591	20.8925	20.6966	20.9634	21.2102
WHY1_ARATH	sp|Q9M9S3|WHY1_ARATH Single-stranded DNA-binding protein WHY1, chloroplastic OS=Arabidopsis thaliana OX=3702 GN=WHY1 PE=1 SV=1	WHY1	29058	7	39.54	3	0.261242	0.248952	22.8153	23.4988	22.9227	23.2592	23.4062	23.3552
A0A178UWW4_ARATH	tr|A0A178UWW4|A0A178UWW4_ARATH (thale cress) hypothetical protein OS=Arabidopsis thaliana OX=3702 GN=AXX17_At4g13890 PE=4 SV=1	AXX17_At4g13890	19465	2	13.53	2	0.260745	0.269808	23.6985	23.071	23.333	23.7526	23.784	23.3481
DJ1A_ARATH	sp|Q9FPF0|DJ1A_ARATH Protein DJ-1 homolog A OS=Arabidopsis thaliana OX=3702 GN=DJ1A PE=1 SV=1	DJ1A	41857	33	66.07	33	0.260691	0.0657814	29.0435	29.0754	28.8669	29.1664	29.311	29.2906
AB36G_ARATH	sp|Q9XIE2|AB36G_ARATH ABC transporter G family member 36 OS=Arabidopsis thaliana OX=3702 GN=ABCG36 PE=1 SV=1	ABCG36	165082	72	42.75	65	0.260312	0.0465382	29.0459	28.9497	29.0174	29.3352	29.1931	29.2656
Q8LB97_ARATH	tr|Q8LB97|Q8LB97_ARATH 3-isopropylmalate dehydrogenase OS=Arabidopsis thaliana OX=3702 PE=2 SV=1		43886	22	58.17	11	0.259729	0.229247	26.1948	26.7874	26.4737	26.8544	26.8507	26.53
SERB1_ARATH	sp|Q96255|SERB1_ARATH Phosphoserine aminotransferase 1, chloroplastic OS=Arabidopsis thaliana OX=3702 GN=PSAT1 PE=1 SV=1	PSAT1	47359	36	74.65	34	0.259433	0.096837	29.1702	29.3936	29.3706	29.6908	29.6096	29.4123
PP351_ARATH	sp|Q8VYR5|PP351_ARATH Pentatricopeptide repeat-containing protein At4g35850, mitochondrial OS=Arabidopsis thaliana OX=3702 GN=At4g35850 PE=1 SV=1	At4g35850	50457	7	20.05	7	0.259062	0.699102	24.2482	24.7399	24.3806	26.1964	24.0361	23.9134
LGUC_ARATH	sp|Q8W593|LGUC_ARATH Probable lactoylglutathione lyase, chloroplastic OS=Arabidopsis thaliana OX=3702 GN=At1g67280 PE=1 SV=1	At1g67280	39167	14	40.29	13	0.258934	0.238831	27.2219	27.8473	27.6968	27.6857	27.8737	27.9834
TCTP1_ARATH	sp|P31265|TCTP1_ARATH Translationally-controlled tumor protein 1 OS=Arabidopsis thaliana OX=3702 GN=TCTP1 PE=1 SV=2	TCTP1	18910	15	73.21	14	0.258378	0.0701611	28.5642	28.5705	28.6092	28.9316	28.6787	28.9088
XYLA_ARATH	sp|Q9FKK7|XYLA_ARATH Xylose isomerase OS=Arabidopsis thaliana OX=3702 GN=XYLA PE=2 SV=2	XYLA	53720	47	74.63	45	0.258205	0.0902287	29.4754	29.3035	29.254	29.7472	29.4852	29.5751
BADH2_ARATH	sp|Q9STS1|BADH2_ARATH Aminoaldehyde dehydrogenase ALDH10A9, peroxisomal OS=Arabidopsis thaliana OX=3702 GN=ALDH10A9 PE=1 SV=1	ALDH10A9	54918	12	43.94	10	0.258111	0.0885417	25.6643	25.4924	25.6382	25.9329	25.6867	25.9496
SCP8_ARATH	sp|Q8RUW5|SCP8_ARATH Serine carboxypeptidase-like 8 OS=Arabidopsis thaliana OX=3702 GN=SCPL8 PE=1 SV=2	SCPL8	49439	5	18.94	5	0.257792	0.564277	23.4128	23.6286	22.5952	22.7138	23.8951	23.8012
RER3_ARATH	sp|Q9C9Z2|RER3_ARATH Protein RETICULATA-RELATED 3, chloroplastic OS=Arabidopsis thaliana OX=3702 GN=RER3 PE=1 SV=1	RER3	35252	10	37.69	9	0.257611	0.24317	25.7848	25.5643	25.2922	26.0891	25.7597	25.5653
RPE_ARATH	sp|Q9SAU2|RPE_ARATH Ribulose-5-phosphate-3-epimerase, chloroplastic OS=Arabidopsis thaliana OX=3702 GN=RPE PE=2 SV=1	RPE	30009	13	67.62	11	0.257562	0.124739	28.4099	28.5036	28.2962	28.82	28.7247	28.4377
TRXF1_ARATH	sp|Q9XFH8|TRXF1_ARATH Thioredoxin F1, chloroplastic OS=Arabidopsis thaliana OX=3702 GN=At3g02730 PE=1 SV=2	At3g02730	19325	6	33.71	5	0.257506	0.255912	25.2839	24.7647	25.2482	25.6176	25.1473	25.3045
P4H4_ARATH	sp|Q8LAN3|P4H4_ARATH Probable prolyl 4-hydroxylase 4 OS=Arabidopsis thaliana OX=3702 GN=P4H4 PE=2 SV=1	P4H4	33061	8	44.63	5	0.256832	0.11597	24.0949	24.3167	24.2121	24.4016	24.6683	24.3243
TC753_ARATH	sp|Q9STE8|TC753_ARATH Protein TOC75-3, chloroplastic OS=Arabidopsis thaliana OX=3702 GN=TOC75-3 PE=1 SV=1	TOC75-3	89189	32	58.44	28	0.256648	0.306565	27.4475	27.2588	27.1847	27.4655	28.0018	27.1938
F16P2_ARATH	sp|Q9MA79|F16P2_ARATH Fructose-1,6-bisphosphatase, cytosolic OS=Arabidopsis thaliana OX=3702 GN=CYFBP PE=1 SV=1	CYFBP	37287	19	61	17	0.255955	0.0629075	27.5092	27.5631	27.3599	27.7966	27.6697	27.7338
A0A654EZ82_ARATH	tr|A0A654EZ82|A0A654EZ82_ARATH Uncharacterized protein OS=Arabidopsis thaliana OX=3702 GN=At2g35810 PE=4 SV=1	At2g35810	22028	5	52.76	5	0.255778	0.235914	23.9751	23.4472	24.0364	23.9328	24.0949	24.1983
A0A178UXG0_ARATH	tr|A0A178UXG0|A0A178UXG0_ARATH Uncharacterized protein OS=Arabidopsis thaliana OX=3702 GN=AXX17_At4g34140 PE=4 SV=1	AXX17_At4g34140	93568	1	1.22	1	0.25545	0.470351	24.2064	24.5294	25.1024	25.3829	24.4416	24.7801
FLA1_ARATH	sp|Q9FM65|FLA1_ARATH Fasciclin-like arabinogalactan protein 1 OS=Arabidopsis thaliana OX=3702 GN=FLA1 PE=1 SV=1	FLA1	44849	6	23.35	4	0.255163	0.796214	23.3923	23.0751	22.2565	24.7625	23.603	21.1238
A0A178UGN6_ARATH	tr|A0A178UGN6|A0A178UGN6_ARATH Endoplasmic reticulum transmembrane protein OS=Arabidopsis thaliana OX=3702 GN=AXX17_At5g47330 PE=3 SV=1	AXX17_At5g47330	24893	1	6.39	1	0.254981	0.340094	21.2327	21.4556	21.0027	21.9306	21.4075	21.1178
ATPG1_ARATH	sp|Q01908|ATPG1_ARATH ATP synthase gamma chain 1, chloroplastic OS=Arabidopsis thaliana OX=3702 GN=ATPC1 PE=1 SV=1	ATPC1	40911	31	67.83	31	0.254935	0.0634419	30.6372	30.6619	30.461	30.7795	30.8812	30.8643
CP29B_ARATH	sp|Q9ZUU4|CP29B_ARATH RNA-binding protein CP29B, chloroplastic OS=Arabidopsis thaliana OX=3702 GN=CP29B PE=1 SV=1	CP29B	30718	11	45.33	9	0.253912	0.260373	27.3267	27.0887	26.681	27.174	27.4975	27.1867
KDSB_ARATH	sp|Q9C920|KDSB_ARATH 3-deoxy-manno-octulosonate cytidylyltransferase, mitochondrial OS=Arabidopsis thaliana OX=3702 GN=KDSB PE=1 SV=1	KDSB	32245	11	46.55	10	0.253686	0.421247	24.371	24.4891	25.2259	24.5814	25.0062	25.2594
AK3_ARATH	sp|Q9S702|AK3_ARATH Aspartokinase 3, chloroplastic OS=Arabidopsis thaliana OX=3702 GN=AK3 PE=1 SV=1	AK3	61216	8	19.5	6	0.253309	0.636918	23.0528	24.6883	23.2749	23.8265	23.4428	24.5067
MMT1_ARATH	sp|Q9LTB2|MMT1_ARATH Methionine S-methyltransferase OS=Arabidopsis thaliana OX=3702 GN=MMT1 PE=1 SV=1	MMT1	118716	32	49.67	29	0.253055	0.049509	27.1192	27.1948	27.2023	27.3663	27.4983	27.4109
MA651_ARATH	sp|Q9FLP0|MA651_ARATH 65-kDa microtubule-associated protein 1 OS=Arabidopsis thaliana OX=3702 GN=MAP65-1 PE=1 SV=1	MAP65-1	65785	10	26.24	8	0.25291	0.182076	24.8865	25.2273	25.2726	25.1619	25.5188	25.4645
AXR4_ARATH	sp|Q9FZ33|AXR4_ARATH Protein AUXIN RESPONSE 4 OS=Arabidopsis thaliana OX=3702 GN=AXR4 PE=1 SV=1	AXR4	52419	9	30.44	9	0.252883	0.179379	25.1279	25.2066	25.2989	25.6199	25.6189	25.1532
CLO_ARATH	sp|Q9LNC5|CLO_ARATH 110 kDa U5 small nuclear ribonucleoprotein component CLO OS=Arabidopsis thaliana OX=3702 GN=CLO PE=1 SV=1	CLO	110442	26	35.36	21	0.25159	0.180178	26.1874	25.689	26.0674	26.2359	26.3381	26.1245
PNSL4_ARATH	sp|Q9SCY3|PNSL4_ARATH Photosynthetic NDH subunit of lumenal location 4, chloroplastic OS=Arabidopsis thaliana OX=3702 GN=PNSL4 PE=1 SV=1	PNSL4	23260	5	26.73	4	0.250657	0.194675	24.66	24.5048	24.6921	24.5494	25.0058	25.0537
MTNA_ARATH	sp|Q9ZUG4|MTNA_ARATH Methylthioribose-1-phosphate isomerase OS=Arabidopsis thaliana OX=3702 GN=At2g05830 PE=1 SV=2	At2g05830	39612	10	37.43	10	0.250095	0.3855	25.7311	24.9958	25.7759	25.8179	25.9868	25.4484
PME17_ARATH	sp|O22149|PME17_ARATH Probable pectinesterase/pectinesterase inhibitor 17 OS=Arabidopsis thaliana OX=3702 GN=PME17 PE=2 SV=2	PME17	55977	8	19.96	7	0.249862	0.502502	24.4401	23.0844	23.9867	24.213	24.0222	24.0255
A0A7G2EGM0_ARATH	tr|A0A7G2EGM0|A0A7G2EGM0_ARATH (thale cress) hypothetical protein OS=Arabidopsis thaliana OX=3702 GN=AT9943_LOCUS8212 PE=4 SV=1	AT9943_LOCUS8212	24530	19	86.67	16	0.24917	0.129752	27.2519	27.4169	27.4151	27.7793	27.3953	27.6568
A0A5S9Y9Q6_ARATH	tr|A0A5S9Y9Q6|A0A5S9Y9Q6_ARATH Uncharacterized protein OS=Arabidopsis thaliana OX=3702 GN=C24_LOCUS23890 PE=4 SV=1	C24_LOCUS23890	10332	2	34.78	2	0.248844	0.3309	24.5387	25.1067	25.1337	25.4709	24.8855	25.1693
RL103_ARATH	sp|Q93W22|RL103_ARATH 60S ribosomal protein L10-3 OS=Arabidopsis thaliana OX=3702 GN=RPL10C PE=2 SV=1	RPL10C	24929	17	51.58	3	0.248617	0.0732001	25.3198	25.4312	25.25	25.5343	25.6919	25.5207
A0A178V0X9_ARATH	tr|A0A178V0X9|A0A178V0X9_ARATH SAP domain-containing protein OS=Arabidopsis thaliana OX=3702 GN=AXX17_At4g45060 PE=4 SV=1	AXX17_At4g45060	69578	10	17.64	7	0.247472	0.140327	24.0278	24.4217	24.3241	24.39	24.5691	24.5569
RS81_ARATH	sp|Q93VG5|RS81_ARATH 40S ribosomal protein S8-1 OS=Arabidopsis thaliana OX=3702 GN=RPS8A PE=1 SV=1	RPS8A	24994	24	59.46	23	0.247331	0.156974	29.5035	29.8152	29.955	30.0949	29.9167	30.0041
A0A5S9YC64_ARATH	tr|A0A5S9YC64|A0A5S9YC64_ARATH Uncharacterized protein OS=Arabidopsis thaliana OX=3702 GN=C24_LOCUS24868 PE=4 SV=1	C24_LOCUS24868	40046	8	38.87	6	0.246759	0.414818	23.8596	23.7356	24.661	24.4214	24.0788	24.4963
A0A1I9LNN0_ARATH	tr|A0A1I9LNN0|A0A1I9LNN0_ARATH Transducin/WD40 repeat-like superfamily protein OS=Arabidopsis thaliana OX=3702 GN=At3g50590 PE=1 SV=1	At3g50590	174993	23	21.23	17	0.246582	0.374228	25.1693	25.5331	25.3727	25.0752	25.8435	25.8962
ATPE_ARATH	sp|P09468|ATPE_ARATH ATP synthase epsilon chain, chloroplastic OS=Arabidopsis thaliana OX=3702 GN=atpE PE=1 SV=2	atpE	14499	17	92.42	16	0.246285	0.177171	28.209	28.0364	27.8301	28.4658	28.264	28.0845
DEX1_ARATH	sp|F4IYM4|DEX1_ARATH Protein DEFECTIVE IN EXINE FORMATION 1 OS=Arabidopsis thaliana OX=3702 GN=DEX1 PE=2 SV=1	DEX1	99711	3	4.13	2	0.246221	0.473596	22.9227	21.9816	22.5374	23.0352	22.9064	22.2388
CDPKL_ARATH	sp|Q9ZSA2|CDPKL_ARATH Calcium-dependent protein kinase 21 OS=Arabidopsis thaliana OX=3702 GN=CPK21 PE=1 SV=1	CPK21	59894	17	38.98	15	0.245669	0.0636846	25.8478	25.8427	25.9595	26.0403	26.1411	26.2056
A0A5S9VRI9_ARATH	tr|A0A5S9VRI9|A0A5S9VRI9_ARATH Carbonic anhydrase OS=Arabidopsis thaliana OX=3702 GN=C24_LOCUS2426 PE=3 SV=1	C24_LOCUS2426	28816	8	46.51	7	0.245043	0.30642	25.1025	25.4234	24.8519	25.0383	25.4896	25.585
PRS4B_ARATH	sp|Q9SL67|PRS4B_ARATH 26S proteasome regulatory subunit 4 homolog B OS=Arabidopsis thaliana OX=3702 GN=RPT2B PE=1 SV=1	RPT2B	49347	28	70.43	26	0.244513	0.0652198	27.8731	27.9193	28.0674	28.2238	28.1567	28.2128
A0A178VLF9_ARATH	tr|A0A178VLF9|A0A178VLF9_ARATH AAA domain-containing protein OS=Arabidopsis thaliana OX=3702 GN=AXX17_At2g13670 PE=3 SV=1	AXX17_At2g13670	71255	5	11.01	3	0.244493	0.429562	22.7297	22.5255	23.5145	23.2887	23.2952	22.9192
Q940G5_ARATH	tr|Q940G5|Q940G5_ARATH Glucose-6-phosphate 1-epimerase OS=Arabidopsis thaliana OX=3702 GN=At4g25900 PE=1 SV=1	At4g25900	36252	17	63.84	17	0.244272	0.0639355	28.1851	28.0235	27.995	28.3173	28.3276	28.2915
OLA1_ARATH	sp|Q9SA73|OLA1_ARATH Obg-like ATPase 1 OS=Arabidopsis thaliana OX=3702 GN=YchF1 PE=1 SV=1	YchF1	44471	31	82.99	28	0.244083	0.081827	28.6852	28.6265	28.8569	28.959	28.8984	29.0436
RZ1C_ARATH	sp|Q8RWN5|RZ1C_ARATH Glycine-rich RNA-binding protein RZ1C OS=Arabidopsis thaliana OX=3702 GN=RZ1C PE=1 SV=1	RZ1C	33486	9	30.32	9	0.244004	0.240533	24.2511	24.6894	24.3992	24.8453	24.4034	24.823
MCAT_ARATH	sp|Q93XM7|MCAT_ARATH Mitochondrial carnitine/acylcarnitine carrier-like protein OS=Arabidopsis thaliana OX=3702 GN=BOU PE=1 SV=1	BOU	31023	17	59.67	17	0.243408	0.211922	27.6734	27.6612	27.147	27.7569	27.7553	27.6997
RS16A_ARATH	sp|O65686|RS16A_ARATH 30S ribosomal protein S16-1, chloroplastic OS=Arabidopsis thaliana OX=3702 GN=RPS16-1 PE=2 SV=1	RPS16-1	12699	3	52.21	3	0.242912	0.431128	24.4647	24.7981	23.804	24.3195	24.6874	24.7886
ECI2_ARATH	sp|O23299|ECI2_ARATH Enoyl-CoA delta isomerase 2, peroxisomal OS=Arabidopsis thaliana OX=3702 GN=ECI2 PE=1 SV=1	ECI2	25773	3	20	3	0.242869	0.425514	23.3761	22.5747	23.5797	23.5953	23.3804	23.2834
GUN25_ARATH	sp|Q38890|GUN25_ARATH Endoglucanase 25 OS=Arabidopsis thaliana OX=3702 GN=KOR PE=1 SV=1	KOR	69191	14	29.79	12	0.242734	0.513115	24.8005	25.1596	25.7607	25.7141	24.9095	25.8253
RS232_ARATH	sp|P49201|RS232_ARATH 40S ribosomal protein S23-2 OS=Arabidopsis thaliana OX=3702 GN=RPS23B PE=2 SV=2	RPS23B	15736	11	53.52	11	0.242583	0.135816	27.5706	27.7517	27.5801	27.6712	28.0436	27.9154
SUR1_ARATH	sp|Q9SIV0|SUR1_ARATH S-alkyl-thiohydroximate lyase SUR1 OS=Arabidopsis thaliana OX=3702 GN=SUR1 PE=1 SV=1	SUR1	51088	33	74.46	31	0.242451	0.106042	28.6411	28.7042	28.8803	28.8413	29.0444	29.0672
RL342_ARATH	sp|Q9FE65|RL342_ARATH 60S ribosomal protein L34-2 OS=Arabidopsis thaliana OX=3702 GN=RPL34B PE=3 SV=1	RPL34B	13650	5	36.97	5	0.241764	0.255374	27.0409	27.1552	26.5607	27.2844	27.1923	27.0054
RAGP1_ARATH	sp|Q9LE82|RAGP1_ARATH RAN GTPase-activating protein 1 OS=Arabidopsis thaliana OX=3702 GN=RANGAP1 PE=1 SV=1	RANGAP1	58827	15	46.17	13	0.241442	0.243538	25.5626	25.8378	26.0849	26.3075	25.9566	25.9454
TTHL_ARATH	sp|Q9LVM5|TTHL_ARATH Uric acid degradation bifunctional protein TTL OS=Arabidopsis thaliana OX=3702 GN=TTL PE=1 SV=1	TTL	35564	3	14.51	1	0.24031	0.319026	20.8118	21.4297	21.3454	21.5599	21.5914	21.1565
A0A178VUZ4_ARATH	tr|A0A178VUZ4|A0A178VUZ4_ARATH Uncharacterized protein OS=Arabidopsis thaliana OX=3702 GN=At2g25970 PE=4 SV=1	At2g25970	33448	9	48.25	8	0.240279	0.292612	24.2105	24.89	24.5378	24.7425	24.9827	24.634
A0A178UHL1_ARATH	tr|A0A178UHL1|A0A178UHL1_ARATH (thale cress) hypothetical protein OS=Arabidopsis thaliana OX=3702 GN=AXX17_At5g08500 PE=4 SV=1	AXX17_At5g08500	45813	4	11.51	3	0.239935	0.565515	21.8168	21.6351	22.3788	21.4633	22.8449	22.2424
A0A7G2EAW8_ARATH	tr|A0A7G2EAW8|A0A7G2EAW8_ARATH Glutathione transferase OS=Arabidopsis thaliana OX=3702 GN=AT9943_LOCUS6184 PE=3 SV=1	AT9943_LOCUS6184	24888	7	39.82	7	0.239132	0.321201	25.4785	24.8478	25.5912	25.6296	25.4304	25.5748
NILP1_ARATH	sp|Q8VYF5|NILP1_ARATH N-carbamoylputrescine amidase OS=Arabidopsis thaliana OX=3702 GN=CPA PE=1 SV=2	CPA	33533	6	30.43	5	0.23913	0.335255	24.7753	24.5965	24.2307	24.4173	24.8385	25.0641
A0A5S9WJ72_ARATH	tr|A0A5S9WJ72|A0A5S9WJ72_ARATH Uncharacterized protein OS=Arabidopsis thaliana OX=3702 GN=C24_LOCUS3361 PE=3 SV=1	C24_LOCUS3361	68985	11	26.98	11	0.238894	0.656318	23.3258	24.9879	24.6385	25.0999	23.9827	24.5863
COPT5_ARATH	sp|Q93VM8|COPT5_ARATH Copper transporter 5 OS=Arabidopsis thaliana OX=3702 GN=COPT5 PE=1 SV=1	COPT5	15784	2	14.38	2	0.238321	0.159036	25.6899	25.964	25.544	25.8868	25.9454	26.0806
A0A7G2EYW1_ARATH	tr|A0A7G2EYW1|A0A7G2EYW1_ARATH (thale cress) hypothetical protein OS=Arabidopsis thaliana OX=3702 GN=AT9943_LOCUS14412 PE=3 SV=1	AT9943_LOCUS14412	62705	15	22.51	15	0.238267	0.0784068	29.0868	29.022	28.9109	29.1593	29.3315	29.2437
14335_ARATH	sp|P42645|14335_ARATH 14-3-3-like protein GF14 upsilon OS=Arabidopsis thaliana OX=3702 GN=GRF5 PE=1 SV=2	GRF5	30182	33	83.21	17	0.237725	0.0858273	28.6924	28.6517	28.5998	29.0004	28.7474	28.9092
PSA3_ARATH	sp|O23715|PSA3_ARATH Proteasome subunit alpha type-3 OS=Arabidopsis thaliana OX=3702 GN=PAG1 PE=1 SV=2	PAG1	27377	20	75.5	20	0.237627	0.0750681	27.9908	28.0158	27.815	28.1582	28.2227	28.1536
Y5586_ARATH	sp|Q9LVQ4|Y5586_ARATH WEB family protein At5g55860 OS=Arabidopsis thaliana OX=3702 GN=At5g55860 PE=1 SV=1	At5g55860	72431	8	16.33	6	0.237546	0.316144	25.8369	26.2172	25.645	26.4304	26.1107	25.8707
AP4M_ARATH	sp|Q9SB50|AP4M_ARATH AP-4 complex subunit mu OS=Arabidopsis thaliana OX=3702 GN=AP4M PE=2 SV=1	AP4M	50946	11	33.92	11	0.237394	0.313707	25.445	25.0236	25.303	25.8586	25.1867	25.4383
DLDH2_ARATH	sp|Q9M5K2|DLDH2_ARATH Dihydrolipoyl dehydrogenase 2, mitochondrial OS=Arabidopsis thaliana OX=3702 GN=LPD2 PE=1 SV=1	LPD2	53986	43	72.39	29	0.237182	0.104009	28.0109	27.9545	28.2093	28.2967	28.3896	28.2
A0A7G2DUN1_ARATH	tr|A0A7G2DUN1|A0A7G2DUN1_ARATH (thale cress) hypothetical protein OS=Arabidopsis thaliana OX=3702 GN=AT9943_LOCUS1748 PE=3 SV=1	AT9943_LOCUS1748	87856	34	46.89	30	0.237076	0.223238	28.2417	28.7066	28.7512	28.906	28.8181	28.6865
CML27_ARATH	sp|Q9LE22|CML27_ARATH Probable calcium-binding protein CML27 OS=Arabidopsis thaliana OX=3702 GN=CML27 PE=1 SV=1	CML27	18350	6	60.59	4	0.236884	0.330845	23.3664	22.8566	22.7946	23.2898	23.4954	22.9432
SPR1_ARATH	sp|Q9SJW3|SPR1_ARATH Protein SPIRAL1 OS=Arabidopsis thaliana OX=3702 GN=SPR1 PE=2 SV=1	SPR1	11920	3	36.97	3	0.236248	0.552328	23.6017	24.8857	23.8238	24.6542	24.0367	24.329
UXS5_ARATH	sp|Q9SN95|UXS5_ARATH UDP-glucuronic acid decarboxylase 5 OS=Arabidopsis thaliana OX=3702 GN=UXS5 PE=2 SV=1	UXS5	38389	37	84.46	9	0.235809	0.411079	24.7105	24.8303	25.4619	25.1155	24.9921	25.6025
TGD2_ARATH	sp|Q9LTR2|TGD2_ARATH Protein TRIGALACTOSYLDIACYLGLYCEROL 2, chloroplastic OS=Arabidopsis thaliana OX=3702 GN=TGD2 PE=1 SV=1	TGD2	41630	15	51.97	15	0.235623	0.137148	26.2915	26.0557	25.9927	26.381	26.4612	26.2046
VCS_ARATH	sp|Q9LTT8|VCS_ARATH Enhancer of mRNA-decapping protein 4 OS=Arabidopsis thaliana OX=3702 GN=VCS PE=1 SV=1	VCS	145720	33	34.15	32	0.235386	0.168707	27.4138	27.5504	27.1141	27.7005	27.5387	27.5453
A0A178UC28_ARATH	tr|A0A178UC28|A0A178UC28_ARATH Peptidase A1 domain-containing protein OS=Arabidopsis thaliana OX=3702 GN=AXX17_At5g06680 PE=3 SV=1	AXX17_At5g06680	48694	25	56.04	24	0.235259	0.156955	29.5376	29.1948	29.5378	29.6835	29.5357	29.7569
U71B7_ARATH	sp|Q9LSY5|U71B7_ARATH UDP-glycosyltransferase 71B7 OS=Arabidopsis thaliana OX=3702 GN=UGT71B7 PE=2 SV=2	UGT71B7	55628	7	21.01	5	0.23496	0.319407	23.5475	23.086	22.8142	23.2342	23.37	23.5483
HSP7P_ARATH	sp|F4HQD4|HSP7P_ARATH Heat shock 70 kDa protein 15 OS=Arabidopsis thaliana OX=3702 GN=HSP70-15 PE=1 SV=1	HSP70-15	91681	63	70.88	60	0.234815	0.0644812	29.4568	29.5009	29.6097	29.7276	29.7493	29.795
RBG7_ARATH	sp|Q03250|RBG7_ARATH Glycine-rich RNA-binding protein 7 OS=Arabidopsis thaliana OX=3702 GN=RBG7 PE=1 SV=1	RBG7	16890	19	78.41	19	0.234717	0.0613632	29.107	29.1971	29.2122	29.4601	29.4035	29.357
CAMT3_ARATH	sp|Q9C5D7|CAMT3_ARATH Probable caffeoyl-CoA O-methyltransferase At4g26220 OS=Arabidopsis thaliana OX=3702 GN=At4g26220 PE=2 SV=1	At4g26220	25946	5	42.67	4	0.234699	0.564957	23.25	22.8978	24.3677	23.6368	23.7414	23.8414
CYP5F_ARATH	sp|O22704|CYP5F_ARATH Cytochrome B5-like protein OS=Arabidopsis thaliana OX=3702 GN=CB5LP PE=2 SV=1	CB5LP	13709	1	18.18	1	0.234312	0.510667	16.3621	16.5153	17.5276	16.9676	17.2676	16.8728
A0A384L6Z1_ARATH	tr|A0A384L6Z1|A0A384L6Z1_ARATH (thale cress) hypothetical protein OS=Arabidopsis thaliana OX=3702 GN=AXX17_At3g56580 PE=3 SV=1	AXX17_At3g56580	20608	27	89.5	2	0.234077	0.715393	22.5507	22.205	23.6991	21.9224	23.6634	23.5713
RD21B_ARATH	sp|Q9FMH8|RD21B_ARATH Probable cysteine protease RD21B OS=Arabidopsis thaliana OX=3702 GN=RD21B PE=1 SV=1	RD21B	51204	7	18.36	5	0.233635	0.14272	25.5485	25.5405	25.7267	26.0082	25.65	25.8583
RH11_ARATH	sp|Q8LA13|RH11_ARATH DEAD-box ATP-dependent RNA helicase 11 OS=Arabidopsis thaliana OX=3702 GN=RH11 PE=1 SV=1	RH11	66026	25	47.88	22	0.233605	0.127024	27.082	27.1188	27.3896	27.3872	27.5304	27.3735
RS253_ARATH	sp|Q8GYL5|RS253_ARATH 40S ribosomal protein S25-3 OS=Arabidopsis thaliana OX=3702 GN=RPS25D PE=3 SV=2	RPS25D	12018	6	42.59	1	0.232809	0.456568	20.7031	21.7944	20.9899	21.3117	21.378	21.4961
RLP29_ARATH	sp|Q9SJH6|RLP29_ARATH Receptor like protein 29 OS=Arabidopsis thaliana OX=3702 GN=RLP29 PE=2 SV=1	RLP29	50801	16	41.34	16	0.232053	0.145332	27.2319	27.2168	27.1228	27.5824	27.1978	27.4874
PPA10_ARATH	sp|Q9SIV9|PPA10_ARATH Purple acid phosphatase 10 OS=Arabidopsis thaliana OX=3702 GN=PAP10 PE=2 SV=1	PAP10	54219	10	32.05	7	0.231626	0.34729	24.6906	24.8024	25.2513	24.7924	25.2973	25.3495
GAPN_ARATH	sp|Q1WIQ6|GAPN_ARATH NADP-dependent glyceraldehyde-3-phosphate dehydrogenase OS=Arabidopsis thaliana OX=3702 GN=ALDH11A3 PE=1 SV=2	ALDH11A3	53060	45	89.52	42	0.230852	0.0998476	29.5251	29.7197	29.4736	29.7309	29.8124	29.8677
MNS2_ARATH	sp|Q8H116|MNS2_ARATH Mannosyl-oligosaccharide 1,2-alpha-mannosidase MNS2 OS=Arabidopsis thaliana OX=3702 GN=MNS2 PE=1 SV=1	MNS2	65136	8	23.6	7	0.230779	0.0964841	25.2608	25.4906	25.2513	25.5184	25.595	25.5817
SAHH1_ARATH	sp|O23255|SAHH1_ARATH Adenosylhomocysteinase 1 OS=Arabidopsis thaliana OX=3702 GN=SAHH1 PE=1 SV=1	SAHH1	53379	73	84.54	28	0.230738	0.104971	30.5999	30.8886	30.7089	31.0017	30.9822	30.9056
LPA1_ARATH	sp|Q9SRY4|LPA1_ARATH Protein LOW PSII ACCUMULATION 1, chloroplastic OS=Arabidopsis thaliana OX=3702 GN=LPA1 PE=1 SV=1	LPA1	50739	5	13.47	5	0.230367	0.468421	23.8081	24.1719	23.1821	24.297	23.8141	23.7421
STLP2_ARATH	sp|Q39221|STLP2_ARATH SEC12-like protein 2 OS=Arabidopsis thaliana OX=3702 GN=STL2P PE=1 SV=4	STL2P	42794	18	60.56	17	0.230026	0.103377	26.177	26.3895	26.2262	26.5081	26.3863	26.5885
SDHA1_ARATH	sp|O82663|SDHA1_ARATH Succinate dehydrogenase [ubiquinone] flavoprotein subunit 1, mitochondrial OS=Arabidopsis thaliana OX=3702 GN=SDH1-1 PE=1 SV=1	SDH1-1	69656	31	56.94	29	0.229793	0.0527212	28.3519	28.352	28.3425	28.5913	28.5795	28.5649
A0A178UZ17_ARATH	tr|A0A178UZ17|A0A178UZ17_ARATH Fe2OG dioxygenase domain-containing protein OS=Arabidopsis thaliana OX=3702 GN=AXX17_At4g19760 PE=3 SV=1	AXX17_At4g19760	32293	5	20.34	4	0.229727	0.699167	23.0508	21.061	22.6718	22.5787	22.9138	21.9803
ACOX1_ARATH	sp|O65202|ACOX1_ARATH Peroxisomal acyl-coenzyme A oxidase 1 OS=Arabidopsis thaliana OX=3702 GN=ACX1 PE=1 SV=1	ACX1	74302	22	46.99	21	0.229277	0.250856	26.4504	26.3492	25.9979	26.6621	26.2583	26.565
SR543_ARATH	sp|P49967|SR543_ARATH Signal recognition particle 54 kDa protein 3 OS=Arabidopsis thaliana OX=3702 GN=SRP-54C PE=2 SV=2	SRP-54C	54782	13	39.39	11	0.229257	0.346853	25.2004	25.6689	25.2293	25.7338	25.8337	25.2189
MRF3_ARATH	sp|Q8W4Q4|MRF3_ARATH MA3 DOMAIN-CONTAINING TRANSLATION REGULATORY FACTOR 3 OS=Arabidopsis thaliana OX=3702 GN=MRF3 PE=1 SV=1	MRF3	77436	24	49.15	21	0.229236	0.293208	27.024	26.5837	27.2955	27.1441	27.2214	27.2255
DECR2_ARATH	sp|Q9LTV6|DECR2_ARATH Peroxisomal 2,4-dienoyl-CoA reductase [(3E)-enoyl-CoA-producing] OS=Arabidopsis thaliana OX=3702 GN=At3g12800 PE=2 SV=1	At3g12800	31796	9	28.19	8	0.228946	0.295425	25.6414	25.3937	24.9633	25.6105	25.4238	25.651
COB22_ARATH	sp|Q9C827|COB22_ARATH Coatomer subunit beta'-2 OS=Arabidopsis thaliana OX=3702 GN=At1g52360 PE=1 SV=1	At1g52360	104467	28	38.34	9	0.22887	0.337558	25.7234	25.8864	25.3433	26.1336	25.5474	25.9586
CISY2_ARATH	sp|Q9LXS6|CISY2_ARATH Citrate synthase 2, peroxisomal OS=Arabidopsis thaliana OX=3702 GN=CSY2 PE=2 SV=1	CSY2	56603	7	16.34	1	0.228307	0.375011	22.1656	22.268	21.6171	22.0676	22.5764	22.0916
C83B1_ARATH	sp|O65782|C83B1_ARATH Cytochrome P450 83B1 OS=Arabidopsis thaliana OX=3702 GN=CYP83B1 PE=1 SV=1	CYP83B1	56846	33	65.33	31	0.228299	0.0750584	28.016	27.971	28.1027	28.2412	28.1976	28.3359
ATS3B_ARATH	sp|Q6NPM5|ATS3B_ARATH Embryo-specific protein ATS3B OS=Arabidopsis thaliana OX=3702 GN=ATS3B PE=1 SV=1	ATS3B	21071	2	16.32	2	0.228253	0.20776	24.2289	24.2972	24.0246	24.4267	24.6347	24.1741
U2AFA_ARATH	sp|Q9S709|U2AFA_ARATH Splicing factor U2af small subunit A OS=Arabidopsis thaliana OX=3702 GN=U2AF35A PE=1 SV=1	U2AF35A	34572	5	23.31	4	0.227588	0.640877	23.7776	23.673	24.2051	24.6116	23.0772	24.6496
CLAH1_ARATH	sp|Q0WNJ6|CLAH1_ARATH Clathrin heavy chain 1 OS=Arabidopsis thaliana OX=3702 GN=CHC1 PE=1 SV=1	CHC1	193245	131	77.13	117	0.227179	0.0658083	31.2813	31.2865	31.1693	31.4567	31.4596	31.5022
PSMD6_ARATH	sp|Q93Y35|PSMD6_ARATH 26S proteasome non-ATPase regulatory subunit 6 homolog OS=Arabidopsis thaliana OX=3702 GN=RPN7 PE=1 SV=1	RPN7	44282	24	55.3	23	0.227104	0.103043	27.6313	27.7869	27.7727	27.8754	27.9057	28.0912
PBER1_ARATH	sp|Q9T030|PBER1_ARATH Phenylcoumaran benzylic ether reductase 1 OS=Arabidopsis thaliana OX=3702 GN=PCBER1 PE=1 SV=1	PCBER1	34072	10	48.05	7	0.22708	0.252462	24.8405	24.6518	24.9477	24.9657	25.3472	24.8083
GSTL2_ARATH	sp|Q9M2W2|GSTL2_ARATH Glutathione S-transferase L2, chloroplastic OS=Arabidopsis thaliana OX=3702 GN=GSTL2 PE=2 SV=1	GSTL2	33058	11	55.14	7	0.226928	0.239733	24.2269	24.0304	23.9919	24.1099	24.198	24.6221
AROG_ARATH	sp|Q00218|AROG_ARATH Phospho-2-dehydro-3-deoxyheptonate aldolase 2, chloroplastic OS=Arabidopsis thaliana OX=3702 GN=DHS2 PE=2 SV=2	DHS2	56149	21	42.41	12	0.226506	0.110399	26.0085	25.9686	25.876	26.0174	26.2475	26.2676
TC10A_ARATH	sp|Q0WRJ2|TC10A_ARATH 3-dehydrosphinganine reductase TSC10A OS=Arabidopsis thaliana OX=3702 GN=TSC10A PE=1 SV=1	TSC10A	34980	1	5.52	1	0.225803	0.262644	21.9148	22.2181	22.4227	22.3325	22.6359	22.2647
TBA1_ARATH	sp|P11139|TBA1_ARATH Tubulin alpha-1 chain OS=Arabidopsis thaliana OX=3702 GN=TUBA1 PE=2 SV=1	TUBA1	49800	31	60.44	13	0.225695	0.26208	27.9591	28.0388	28.5424	28.4771	28.3739	28.3664
GRXC4_ARATH	sp|Q8LFQ6|GRXC4_ARATH Glutaredoxin-C4 OS=Arabidopsis thaliana OX=3702 GN=GRXC4 PE=2 SV=2	GRXC4	14827	4	45.93	3	0.225565	0.199992	25.2737	25.5873	25.2485	25.3939	25.7159	25.6763
CP18A_ARATH	sp|Q9LPC7|CP18A_ARATH Peptidyl-prolyl cis-trans isomerase CYP18-1 OS=Arabidopsis thaliana OX=3702 GN=CYP18-1 PE=2 SV=1	CYP18-1	17503	2	16.88	2	0.225089	0.58664	21.8417	23.2343	23.0025	23.1565	22.9454	22.6519
SNX1_ARATH	sp|Q9FG38|SNX1_ARATH Sorting nexin 1 OS=Arabidopsis thaliana OX=3702 GN=SNX1 PE=1 SV=1	SNX1	46523	18	51.99	17	0.224708	0.441055	25.429	25.6702	25.8906	25.7907	26.4052	25.4682
GSTF9_ARATH	sp|O80852|GSTF9_ARATH Glutathione S-transferase F9 OS=Arabidopsis thaliana OX=3702 GN=GSTF9 PE=1 SV=1	GSTF9	24146	35	90.7	33	0.224571	0.0869218	32.2813	32.3511	32.4733	32.6582	32.5437	32.5776
RS252_ARATH	sp|Q9SIK2|RS252_ARATH 40S ribosomal protein S25-2 OS=Arabidopsis thaliana OX=3702 GN=RPS25B PE=3 SV=1	RPS25B	12069	7	44.44	3	0.224416	0.313575	25.8938	25.9837	25.9232	25.9997	26.5821	25.8921
A0A178V0L9_ARATH	tr|A0A178V0L9|A0A178V0L9_ARATH (thale cress) hypothetical protein OS=Arabidopsis thaliana OX=3702 GN=AXX17_At4g01090 PE=4 SV=1	AXX17_At4g01090	8606	2	16.25	2	0.224386	0.176152	22.4536	22.651	22.785	22.7542	22.7711	23.0376
A0A178ULP9_ARATH	tr|A0A178ULP9|A0A178ULP9_ARATH (thale cress) hypothetical protein OS=Arabidopsis thaliana OX=3702 GN=At5g04440 PE=4 SV=1	At5g04440	28156	1	7.84	1	0.224265	0.432077	20.5366	21.555	20.9387	21.1745	21.2628	21.2658
P2_ARATH	sp|Q39173|P2_ARATH NADP-dependent alkenal double bond reductase P2 OS=Arabidopsis thaliana OX=3702 GN=P2 PE=2 SV=2	P2	37989	13	65.01	6	0.224215	0.446259	25.0845	25.4114	24.4685	25.0783	25.0707	25.4881
RS101_ARATH	sp|Q9SW09|RS101_ARATH 40S ribosomal protein S10-1 OS=Arabidopsis thaliana OX=3702 GN=RPS10A PE=1 SV=1	RPS10A	19447	14	64.41	11	0.22415	0.178156	27.4555	27.1137	27.5523	27.5684	27.6033	27.6224
A0A5S9WT63_ARATH	tr|A0A5S9WT63|A0A5S9WT63_ARATH Asparagine--tRNA ligase OS=Arabidopsis thaliana OX=3702 GN=C24_LOCUS6025 PE=3 SV=1	C24_LOCUS6025	63706	7	13.66	1	0.224107	0.382275	20.0242	20.5463	20.9093	20.8006	20.6494	20.7021
RS193_ARATH	sp|Q9FNP8|RS193_ARATH 40S ribosomal protein S19-3 OS=Arabidopsis thaliana OX=3702 GN=RPS19C PE=2 SV=1	RPS19C	15697	12	55.24	11	0.223965	0.205743	28.7499	29.1349	28.7493	29.0031	29.2574	29.0455
RAA2D_ARATH	sp|Q9FIF9|RAA2D_ARATH Ras-related protein RABA2d OS=Arabidopsis thaliana OX=3702 GN=RABA2D PE=2 SV=1	RABA2D	23816	14	69.59	3	0.223771	0.352263	24.3063	25.0978	24.8634	25.0783	24.9374	24.9231
A0A1P8BG25_ARATH	tr|A0A1P8BG25|A0A1P8BG25_ARATH Glycosyl hydrolase family protein OS=Arabidopsis thaliana OX=3702 GN=At5g20950 PE=1 SV=1	At5g20950	77162	35	47.15	33	0.223549	0.114743	28.5277	28.2616	28.4462	28.7058	28.6438	28.5566
DRP3B_ARATH	sp|Q8LFT2|DRP3B_ARATH Dynamin-related protein 3B OS=Arabidopsis thaliana OX=3702 GN=DRP3B PE=1 SV=2	DRP3B	86644	19	26.92	16	0.22346	0.583445	25.7462	24.5521	25.9222	25.8502	25.6112	25.4294
A0A178VEU8_ARATH	tr|A0A178VEU8|A0A178VEU8_ARATH (thale cress) hypothetical protein OS=Arabidopsis thaliana OX=3702 GN=AXX17_At3g54630 PE=3 SV=1	AXX17_At3g54630	187717	20	17.1	15	0.222949	0.638416	24.1339	24.0415	24.9806	25.1186	24.962	23.7444
RL74_ARATH	sp|Q9LHP1|RL74_ARATH 60S ribosomal protein L7-4 OS=Arabidopsis thaliana OX=3702 GN=RPL7D PE=2 SV=1	RPL7D	28433	20	64.34	4	0.22226	0.466506	25.3913	25.6749	24.612	25.5092	25.4991	25.3368
FPPS1_ARATH	sp|Q09152|FPPS1_ARATH Farnesyl pyrophosphate synthase 1, mitochondrial OS=Arabidopsis thaliana OX=3702 GN=FPS1 PE=2 SV=2	FPS1	44261	11	29.17	11	0.222189	0.268854	26.7403	26.22	26.7357	26.6822	26.9187	26.7616
RL62_ARATH	sp|Q9C9C6|RL62_ARATH 60S ribosomal protein L6-2 OS=Arabidopsis thaliana OX=3702 GN=RPL6B PE=2 SV=1	RPL6B	26009	24	69.1	24	0.221968	0.0760134	28.8244	28.8392	28.9086	29.1254	28.996	29.1168
MT127_ARATH	sp|Q9C7F9|MT127_ARATH Probable methyltransferase At1g27930 OS=Arabidopsis thaliana OX=3702 GN=At1g27930 PE=1 SV=1	At1g27930	32356	2	9.69	1	0.221913	0.387738	21.4164	22.058	21.6911	21.9687	21.6135	22.249
GCSP2_ARATH	sp|O80988|GCSP2_ARATH Glycine dehydrogenase (decarboxylating) 2, mitochondrial OS=Arabidopsis thaliana OX=3702 GN=GLDP2 PE=1 SV=1	GLDP2	113776	65	52.49	22	0.221773	0.0858983	28.4874	28.2997	28.4472	28.5911	28.6659	28.6426
VDAC3_ARATH	sp|Q9SMX3|VDAC3_ARATH Mitochondrial outer membrane protein porin 3 OS=Arabidopsis thaliana OX=3702 GN=VDAC3 PE=1 SV=3	VDAC3	29211	17	67.52	12	0.221316	0.165834	28.7803	28.9447	29.1662	29.1908	29.092	29.2723
CBF5_ARATH	sp|Q9LD90|CBF5_ARATH H/ACA ribonucleoprotein complex subunit 4 OS=Arabidopsis thaliana OX=3702 GN=CBF5 PE=1 SV=1	CBF5	63026	17	37.17	17	0.221198	0.318866	25.2412	25.8437	25.7695	26.0361	25.6958	25.7861
DRTS1_ARATH	sp|Q05762|DRTS1_ARATH Bifunctional dihydrofolate reductase-thymidylate synthase 1 OS=Arabidopsis thaliana OX=3702 GN=THY-1 PE=1 SV=2	THY-1	58143	3	7.9	3	0.220999	0.737696	21.6149	22.1871	22.2036	20.7876	22.8475	23.0334
SSDH_ARATH	sp|Q9SAK4|SSDH_ARATH Succinate-semialdehyde dehydrogenase, mitochondrial OS=Arabidopsis thaliana OX=3702 GN=ALDH5F1 PE=1 SV=2	ALDH5F1	56559	29	65.53	27	0.220745	0.202177	27.3848	27.3558	27.6563	27.9035	27.5599	27.5957
UXS3_ARATH	sp|Q9FIE8|UXS3_ARATH UDP-glucuronic acid decarboxylase 3 OS=Arabidopsis thaliana OX=3702 GN=UXS3 PE=1 SV=1	UXS3	38569	48	86.55	44	0.220638	0.124276	30.7234	30.921	30.9747	31.0728	31.0105	31.1977
U74B1_ARATH	sp|O48676|U74B1_ARATH UDP-glycosyltransferase 74B1 OS=Arabidopsis thaliana OX=3702 GN=UGT74B1 PE=1 SV=1	UGT74B1	51002	18	42.61	16	0.219423	0.180815	27.3115	27.4525	27.4341	27.5422	27.8596	27.4545
CTL1_ARATH	sp|Q9MA41|CTL1_ARATH Chitinase-like protein 1 OS=Arabidopsis thaliana OX=3702 GN=CTL1 PE=1 SV=1	CTL1	35579	4	26.79	2	0.218193	0.669363	21.3676	22.9224	22.6574	23.1502	22.2145	22.2372
TR130_ARATH	sp|F4K0C4|TR130_ARATH Trafficking protein particle complex II-specific subunit 130 homolog OS=Arabidopsis thaliana OX=3702 GN=TRS130 PE=1 SV=1	TRS130	140681	17	18.9	13	0.217965	0.356211	24.8743	25.0673	24.658	24.6788	25.2932	25.2816
NTF2A_ARATH	sp|Q9FZK4|NTF2A_ARATH Nuclear transport factor 2A OS=Arabidopsis thaliana OX=3702 GN=NTF2A PE=1 SV=1	NTF2A	13527	4	61.48	3	0.217459	0.142012	25.1902	25.2969	25.3723	25.631	25.5487	25.332
Q9CAW4_ARATH	tr|Q9CAW4|Q9CAW4_ARATH Transport protein particle (TRAPP) component OS=Arabidopsis thaliana OX=3702 GN=At3g05000 PE=1 SV=1	At3g05000	19572	5	39.31	5	0.217377	0.316515	24.5813	25.2365	24.7188	25.1197	25.1313	24.9378
ATPF_ARATH	sp|P56759|ATPF_ARATH ATP synthase subunit b, chloroplastic OS=Arabidopsis thaliana OX=3702 GN=atpF PE=3 SV=1	atpF	21057	15	63.59	14	0.216772	0.154325	28.9586	28.7703	28.6064	29.0629	29.0126	28.9102
A0A178V3L7_ARATH	tr|A0A178V3L7|A0A178V3L7_ARATH ARMT1-like_dom domain-containing protein OS=Arabidopsis thaliana OX=3702 GN=AXX17_At4g40400 PE=4 SV=1	AXX17_At4g40400	41015	14	56.4	12	0.216263	0.220746	25.163	25.2071	25.5613	25.6723	25.3826	25.5254
Q8GY15_ARATH	tr|Q8GY15|Q8GY15_ARATH Tubulin beta chain OS=Arabidopsis thaliana OX=3702 GN=At5g12250/MXC9_21 PE=2 SV=1	At5g12250/MXC9_21	50614	52	76.84	2	0.216036	0.107922	26.0845	25.9688	25.9532	26.1693	26.3447	26.1406
IDI1_ARATH	sp|Q38929|IDI1_ARATH Isopentenyl-diphosphate Delta-isomerase I, chloroplastic OS=Arabidopsis thaliana OX=3702 GN=IPP1 PE=1 SV=3	IPP1	33214	18	58.42	18	0.215636	0.2365	26.6894	26.5768	26.9936	27.0782	27.0597	26.7689
A0A178WGM6_ARATH	tr|A0A178WGM6|A0A178WGM6_ARATH (thale cress) hypothetical protein OS=Arabidopsis thaliana OX=3702 GN=At1g09150 PE=4 SV=1	At1g09150	20457	3	21.55	3	0.215339	0.744654	23.1911	23.1264	21.851	23.3127	23.7495	21.7523
TL16_ARATH	sp|O22773|TL16_ARATH Thylakoid lumenal 16.5 kDa protein, chloroplastic OS=Arabidopsis thaliana OX=3702 GN=At4g02530 PE=1 SV=3	At4g02530	23663	8	52.31	8	0.214938	0.143009	26.6559	26.402	26.3232	26.6614	26.7076	26.6569
RL52_ARATH	sp|P49227|RL52_ARATH 60S ribosomal protein L5-2 OS=Arabidopsis thaliana OX=3702 GN=RPL5B PE=2 SV=3	RPL5B	34437	26	61.13	25	0.214795	0.161926	29.5808	29.6082	29.9352	29.9283	29.9324	29.9079
A0A178UQB1_ARATH	tr|A0A178UQB1|A0A178UQB1_ARATH (thale cress) hypothetical protein OS=Arabidopsis thaliana OX=3702 GN=AXX17_At5g47660 PE=3 SV=1	AXX17_At5g47660	70319	24	50.24	22	0.214677	0.229454	25.7384	26.0445	25.5529	26.0857	26.0077	25.8865
LRP6A_ARATH	sp|Q94A38|LRP6A_ARATH La-related protein 6A OS=Arabidopsis thaliana OX=3702 GN=LARP6A PE=2 SV=1	LARP6A	46842	1	3.08	1	0.213876	0.421879	20.9273	20.639	21.1598	20.7054	21.1666	21.4957
A0A178W0Q2_ARATH	tr|A0A178W0Q2|A0A178W0Q2_ARATH Uncharacterized protein OS=Arabidopsis thaliana OX=3702 GN=AXX17_At2g17520 PE=4 SV=1	AXX17_At2g17520	35816	9	35.84	8	0.213345	0.590894	24.9403	23.6105	24.3329	24.126	24.8233	24.5744
A0A178WAH4_ARATH	tr|A0A178WAH4|A0A178WAH4_ARATH SurE domain-containing protein OS=Arabidopsis thaliana OX=3702 GN=At1g72880 PE=3 SV=1	At1g72880	40674	2	8.83	1	0.213042	0.0957992	22.1931	22.1936	22.3643	22.5043	22.43	22.4559
A0A384KMG1_ARATH	tr|A0A384KMG1|A0A384KMG1_ARATH (thale cress) hypothetical protein OS=Arabidopsis thaliana OX=3702 GN=At3g20680 PE=4 SV=1	At3g20680	37436	4	21.89	2	0.213031	0.238273	22.9733	23.0515	23.1246	23.5359	23.0117	23.2409
TO203_ARATH	sp|P82874|TO203_ARATH Mitochondrial import receptor subunit TOM20-3 OS=Arabidopsis thaliana OX=3702 GN=TOM20-3 PE=1 SV=1	TOM20-3	22565	4	34.65	4	0.212941	0.537381	23.3658	22.9545	22.1015	23.0398	23.0318	22.9891
GPLPC_ARATH	sp|Q9LV28|GPLPC_ARATH Receptor for activated C kinase 1C OS=Arabidopsis thaliana OX=3702 GN=RACK1C PE=1 SV=1	RACK1C	35828	20	66.56	13	0.21175	0.122649	26.5266	26.632	26.6889	26.9198	26.6938	26.8692
A0A178VUW7_ARATH	tr|A0A178VUW7|A0A178VUW7_ARATH PHB domain-containing protein OS=Arabidopsis thaliana OX=3702 GN=AXX17_At2g02510 PE=3 SV=1	AXX17_At2g02510	40626	12	36.24	10	0.211704	0.0866597	26.2432	26.097	26.2331	26.3998	26.3832	26.4254
PLR1_ARATH	sp|Q56Y42|PLR1_ARATH Pyridoxal reductase, chloroplastic OS=Arabidopsis thaliana OX=3702 GN=PLR1 PE=1 SV=1	PLR1	40576	5	16.16	3	0.211558	0.776209	19.625	22.4859	21.2385	21.0227	21.5732	21.388
STR11_ARATH	sp|Q0WWT7|STR11_ARATH Rhodanese-like domain-containing protein 11, chloroplastic OS=Arabidopsis thaliana OX=3702 GN=STR11 PE=2 SV=1	STR11	32114	5	28.08	3	0.211459	0.370159	24.7448	25.3571	24.9552	25.424	25.3362	24.9313
A0A178VNB0_ARATH	tr|A0A178VNB0|A0A178VNB0_ARATH AB hydrolase-1 domain-containing protein OS=Arabidopsis thaliana OX=3702 GN=AXX17_At3g42520 PE=4 SV=1	AXX17_At3g42520	43495	3	11.43	3	0.211059	0.685062	22.5301	21.0523	22.8702	22.5731	22.4776	22.0351
MTX_ARATH	sp|O64471|MTX_ARATH Mitochondrial outer membrane import complex protein METAXIN OS=Arabidopsis thaliana OX=3702 GN=MTX1 PE=1 SV=1	MTX1	35854	7	36.19	7	0.210615	0.227554	24.285	24.1392	24.1689	24.3277	24.6848	24.2124
DHE1_ARATH	sp|Q43314|DHE1_ARATH Glutamate dehydrogenase 1 OS=Arabidopsis thaliana OX=3702 GN=GDH1 PE=1 SV=1	GDH1	44524	25	61.31	18	0.210542	0.155976	27.3606	27.0961	27.1346	27.537	27.3665	27.3195
ETHE1_ARATH	sp|Q9C8L4|ETHE1_ARATH Persulfide dioxygenase ETHE1 homolog, mitochondrial OS=Arabidopsis thaliana OX=3702 GN=GLY3 PE=1 SV=3	GLY3	32332	16	64.29	14	0.210351	0.207045	27.5704	27.7871	27.9991	27.906	27.9763	28.1052
PUB13_ARATH	sp|Q9SNC6|PUB13_ARATH U-box domain-containing protein 13 OS=Arabidopsis thaliana OX=3702 GN=PUB13 PE=1 SV=1	PUB13	71966	4	11.06	2	0.210162	0.631367	21.7297	21.0878	20.2897	21.6599	20.8037	21.2741
ADF2_ARATH	sp|Q39251|ADF2_ARATH Actin-depolymerizing factor 2 OS=Arabidopsis thaliana OX=3702 GN=ADF2 PE=1 SV=1	ADF2	15745	13	81.75	13	0.209991	0.195104	27.7015	27.6505	27.6223	28.049	27.9326	27.6225
GRS16_ARATH	sp|Q8H7F6|GRS16_ARATH Bifunctional monothiol glutaredoxin-S16, chloroplastic OS=Arabidopsis thaliana OX=3702 GN=GRXS16 PE=1 SV=2	GRXS16	32206	8	36.52	5	0.209463	0.262807	25.0882	25.1342	25.0491	25.0261	25.2739	25.5997
E70B1_ARATH	sp|Q9FGH9|E70B1_ARATH Exocyst complex component EXO70B1 OS=Arabidopsis thaliana OX=3702 GN=EXO70B1 PE=1 SV=1	EXO70B1	70640	2	3.37	2	0.209139	0.546685	21.2235	22.1571	21.1141	21.833	21.359	21.93
SOT18_ARATH	sp|Q9C9C9|SOT18_ARATH Cytosolic sulfotransferase 18 OS=Arabidopsis thaliana OX=3702 GN=SOT18 PE=1 SV=1	SOT18	40465	34	85.43	33	0.209039	0.124165	28.3064	28.4398	28.5097	28.6708	28.6948	28.5175
TI232_ARATH	sp|Q38820|TI232_ARATH Mitochondrial import inner membrane translocase subunit TIM23-2 OS=Arabidopsis thaliana OX=3702 GN=TIM23-2 PE=1 SV=1	TIM23-2	19878	3	26.06	3	0.208581	0.285726	23.4717	23.2281	22.9033	23.2756	23.5264	23.4269
PFKA5_ARATH	sp|Q8VYN6|PFKA5_ARATH ATP-dependent 6-phosphofructokinase 5, chloroplastic OS=Arabidopsis thaliana OX=3702 GN=PFK5 PE=1 SV=1	PFK5	58615	24	54.56	22	0.207944	0.117834	27.3969	27.646	27.5747	27.7696	27.7256	27.7462
AL2B4_ARATH	sp|Q9SU63|AL2B4_ARATH Aldehyde dehydrogenase family 2 member B4, mitochondrial OS=Arabidopsis thaliana OX=3702 GN=ALDH2B4 PE=1 SV=1	ALDH2B4	58589	26	65.99	25	0.207381	0.0905236	28.9919	28.9291	29.0014	29.1152	29.1719	29.2574
PSA2A_ARATH	sp|O23708|PSA2A_ARATH Proteasome subunit alpha type-2-A OS=Arabidopsis thaliana OX=3702 GN=PAB1 PE=1 SV=1	PAB1	25701	16	86.38	15	0.207237	0.111331	27.6429	27.6437	27.7625	28.001	27.8502	27.8197
CSN1_ARATH	sp|P45432|CSN1_ARATH COP9 signalosome complex subunit 1 OS=Arabidopsis thaliana OX=3702 GN=CSN1 PE=1 SV=2	CSN1	50579	9	28.8	7	0.207161	0.36421	24.3812	23.916	24.5375	24.302	24.4262	24.7279
A0A7G2FDZ4_ARATH	tr|A0A7G2FDZ4|A0A7G2FDZ4_ARATH (thale cress) hypothetical protein OS=Arabidopsis thaliana OX=3702 GN=AT9943_LOCUS18913 PE=3 SV=1	AT9943_LOCUS18913	145887	27	27.57	24	0.206079	0.15809	26.2082	26.3197	26.5226	26.6422	26.4929	26.5336
RL122_ARATH	sp|Q9LFH5|RL122_ARATH 60S ribosomal protein L12-2 OS=Arabidopsis thaliana OX=3702 GN=RPL12B PE=1 SV=1	RPL12B	17970	7	54.22	1	0.205991	0.382858	23.9761	23.9153	23.5602	23.6329	24.2647	24.172
CRY1_ARATH	sp|Q43125|CRY1_ARATH Cryptochrome-1 OS=Arabidopsis thaliana OX=3702 GN=CRY1 PE=1 SV=2	CRY1	76695	11	24.08	6	0.205738	0.642359	22.0329	22.8125	23.3266	23.1535	23.3283	22.3074
MSI4_ARATH	sp|O22607|MSI4_ARATH WD-40 repeat-containing protein MSI4 OS=Arabidopsis thaliana OX=3702 GN=MSI4 PE=1 SV=3	MSI4	55759	15	52.66	13	0.205724	0.188548	26.3005	26.0812	26.1841	26.1935	26.5335	26.4559
A0A178VSW6_ARATH	tr|A0A178VSW6|A0A178VSW6_ARATH (thale cress) hypothetical protein OS=Arabidopsis thaliana OX=3702 GN=AXX17_At2g22040 PE=4 SV=1	AXX17_At2g22040	20296	2	15.79	2	0.205657	0.605439	21.4237	21.5611	21.1247	21.0176	22.3928	21.316
VP53A_ARATH	sp|Q0WQF4|VP53A_ARATH Vacuolar protein sorting-associated protein 53 A OS=Arabidopsis thaliana OX=3702 GN=VPS53 PE=1 SV=1	VPS53	92530	8	13.77	7	0.205297	0.40064	24.2677	23.6115	24.3928	24.3879	24.2454	24.2545
NBP35_ARATH	sp|Q8H1Q2|NBP35_ARATH Cytosolic Fe-S cluster assembly factor NBP35 OS=Arabidopsis thaliana OX=3702 GN=NBP35 PE=1 SV=1	NBP35	37306	5	16.29	5	0.204804	0.630107	22.6256	23.1519	23.7445	23.7726	23.6636	22.7002
TCPD_ARATH	sp|Q9LV21|TCPD_ARATH T-complex protein 1 subunit delta OS=Arabidopsis thaliana OX=3702 GN=CCT4 PE=1 SV=1	CCT4	57775	31	60.07	31	0.203542	0.190973	28.6343	28.2262	28.4775	28.6784	28.6259	28.6442
A0A384KYY4_ARATH	tr|A0A384KYY4|A0A384KYY4_ARATH (thale cress) hypothetical protein OS=Arabidopsis thaliana OX=3702 GN=At3g19370 PE=3 SV=1	At3g19370	81548	5	10.09	5	0.203492	0.809823	21.7851	23.1941	22.8188	22.0637	24.5259	21.8188
A0A7G2EJX0_ARATH	tr|A0A7G2EJX0|A0A7G2EJX0_ARATH Phosphoenolpyruvate carboxylase OS=Arabidopsis thaliana OX=3702 GN=AT9943_LOCUS9249 PE=3 SV=1	AT9943_LOCUS9249	138766	115	81.9	111	0.203072	0.0938346	30.894	30.97	30.9077	31.1036	31.2012	31.076
PRL1_ARATH	sp|Q42384|PRL1_ARATH Protein pleiotropic regulatory locus 1 OS=Arabidopsis thaliana OX=3702 GN=PRL1 PE=1 SV=1	PRL1	54009	6	16.05	4	0.202527	0.316807	23.9612	23.792	23.549	23.9071	23.7502	24.2525
RL222_ARATH	sp|Q9M9W1|RL222_ARATH 60S ribosomal protein L22-2 OS=Arabidopsis thaliana OX=3702 GN=RPL22B PE=2 SV=1	RPL22B	14018	14	62.9	14	0.202437	0.152137	28.5018	28.4155	28.5126	28.758	28.7779	28.5013
IMPL1_ARATH	sp|Q94F00|IMPL1_ARATH Phosphatase IMPL1, chloroplastic OS=Arabidopsis thaliana OX=3702 GN=IMPL1 PE=1 SV=2	IMPL1	40445	11	46.36	9	0.202055	0.680437	24.9485	25.5788	26.1606	25.3914	26.6045	25.2982
SCP49_ARATH	sp|P32826|SCP49_ARATH Serine carboxypeptidase-like 49 OS=Arabidopsis thaliana OX=3702 GN=SCPL49 PE=2 SV=2	SCPL49	57301	11	23.06	10	0.202048	0.344415	25.983	25.7164	25.8864	26.2448	26.2651	25.6821
NDUA6_ARATH	sp|Q9LHI0|NDUA6_ARATH NADH dehydrogenase [ubiquinone] 1 alpha subcomplex subunit 6 OS=Arabidopsis thaliana OX=3702 GN=At3g12260 PE=1 SV=1	At3g12260	15082	5	44.36	5	0.201842	0.206489	24.6536	24.7718	24.5573	25.0729	24.6963	24.8191
EF1B2_ARATH	sp|Q9SCX3|EF1B2_ARATH Elongation factor 1-beta 2 OS=Arabidopsis thaliana OX=3702 GN=At5g19510 PE=1 SV=1	At5g19510	24201	16	50.45	15	0.20153	0.187753	28.1641	28.2593	28.5413	28.5322	28.5586	28.4785
FAX1_ARATH	sp|Q93V66|FAX1_ARATH Protein FATTY ACID EXPORT 1, chloroplastic OS=Arabidopsis thaliana OX=3702 GN=FAX1 PE=1 SV=1	FAX1	24347	5	30.09	3	0.200963	0.552033	24.5985	24.2258	23.3852	24.3151	24.3529	24.1444
C79F1_ARATH	sp|Q949U1|C79F1_ARATH Dihomomethionine N-hydroxylase OS=Arabidopsis thaliana OX=3702 GN=CYP79F1 PE=1 SV=1	CYP79F1	61695	44	69.89	43	0.200916	0.275193	28.0675	28.2551	28.6277	28.5337	28.5089	28.5105
A0A178UBA8_ARATH	tr|A0A178UBA8|A0A178UBA8_ARATH (thale cress) hypothetical protein OS=Arabidopsis thaliana OX=3702 GN=AXX17_At5g67200 PE=4 SV=1	AXX17_At5g67200	49954	9	32.59	7	0.200562	0.383771	24.5236	24.242	24.4664	24.6107	24.9787	24.2444
C3H33_ARATH	sp|Q8GXX7|C3H33_ARATH Zinc finger CCCH domain-containing protein 33 OS=Arabidopsis thaliana OX=3702 GN=ZFN1 PE=1 SV=1	ZFN1	44181	3	10.08	2	0.200313	0.395634	22.5735	21.8998	22.2399	22.6976	22.3646	22.2518
A0A178VUS5_ARATH	tr|A0A178VUS5|A0A178VUS5_ARATH Uncharacterized protein OS=Arabidopsis thaliana OX=3702 GN=AXX17_At2g41600 PE=3 SV=1	AXX17_At2g41600	36036	27	76.31	27	0.200218	0.0969431	28.5887	28.7005	28.6269	28.7811	28.8614	28.8742
LACS4_ARATH	sp|Q9T0A0|LACS4_ARATH Long chain acyl-CoA synthetase 4 OS=Arabidopsis thaliana OX=3702 GN=LACS4 PE=2 SV=1	LACS4	74508	38	61.86	35	0.199937	0.107514	28.4528	28.3753	28.3246	28.6659	28.5496	28.537
A0A178UKX2_ARATH	tr|A0A178UKX2|A0A178UKX2_ARATH HBP5 OS=Arabidopsis thaliana OX=3702 GN=AXX17_At5g20100 PE=3 SV=1	AXX17_At5g20100	43090	8	35.45	6	0.199656	0.173859	24.1767	24.1247	24.179	24.235	24.5654	24.2789
FIS1A_ARATH	sp|Q9M1J1|FIS1A_ARATH Mitochondrial fission 1 protein A OS=Arabidopsis thaliana OX=3702 GN=FIS1A PE=1 SV=1	FIS1A	18698	5	46.47	4	0.199187	0.488331	23.9433	23.2472	24.1942	23.8545	23.9269	24.2008
KNAT3_ARATH	sp|P48000|KNAT3_ARATH Homeobox protein knotted-1-like 3 OS=Arabidopsis thaliana OX=3702 GN=KNAT3 PE=1 SV=1	KNAT3	47600	2	4.64	2	0.199042	0.780698	22.9133	22.5451	24.0688	23.8286	22.0606	24.2351
DJ1E_ARATH	sp|Q9ZV19|DJ1E_ARATH DJ-1 protein homolog E OS=Arabidopsis thaliana OX=3702 GN=DJ1E PE=1 SV=1	DJ1E	42730	10	26.13	8	0.198795	0.332298	25.274	25.6779	25.8475	25.757	25.98	25.6588
FK201_ARATH	sp|Q9M2S7|FK201_ARATH Peptidyl-prolyl cis-trans isomerase FKBP20-1 OS=Arabidopsis thaliana OX=3702 GN=FKBP20-1 PE=1 SV=1	FKBP20-1	20348	2	11.58	2	0.198588	0.726974	22.3567	20.9819	20.9039	20.9082	22.3969	21.5332
RL23_ARATH	sp|P49690|RL23_ARATH 60S ribosomal protein L23 OS=Arabidopsis thaliana OX=3702 GN=RPL23A PE=2 SV=3	RPL23A	15027	19	76.43	18	0.198413	0.140754	28.6241	28.7783	28.883	28.9117	28.9493	29.0197
IDE1_ARATH	sp|O22941|IDE1_ARATH Insulin-degrading enzyme-like 1, peroxisomal OS=Arabidopsis thaliana OX=3702 GN=PXM16 PE=2 SV=1	PXM16	110995	24	41.86	21	0.198207	0.132339	26.6094	26.5752	26.7711	26.7814	26.9334	26.8356
ISOA3_ARATH	sp|Q9M0S5|ISOA3_ARATH Isoamylase 3, chloroplastic OS=Arabidopsis thaliana OX=3702 GN=ISA3 PE=1 SV=2	ISA3	86322	18	36.13	14	0.197949	0.351574	25.2077	24.5179	24.9131	25.0566	25.1664	25.0095
HIR2_ARATH	sp|Q9CAR7|HIR2_ARATH Hypersensitive-induced response protein 2 OS=Arabidopsis thaliana OX=3702 GN=HIR2 PE=1 SV=1	HIR2	31406	25	84.97	22	0.197473	0.135397	28.0636	27.9502	27.9593	28.3098	28.1781	28.0776
NSF_ARATH	sp|Q9M0Y8|NSF_ARATH Vesicle-fusing ATPase OS=Arabidopsis thaliana OX=3702 GN=NSF PE=1 SV=2	NSF	81487	48	65.77	43	0.197115	0.0973691	27.9152	27.998	28.0106	28.1885	28.2042	28.1225
RLA13_ARATH	sp|Q8LEQ0|RLA13_ARATH 60S acidic ribosomal protein P1-3 OS=Arabidopsis thaliana OX=3702 GN=RPP1C PE=1 SV=2	RPP1C	11247	2	49.56	1	0.196468	0.524059	21.2881	22.0519	21.8858	22.111	22.2264	21.4778
RS62_ARATH	sp|P51430|RS62_ARATH 40S ribosomal protein S6-2 OS=Arabidopsis thaliana OX=3702 GN=RPS6B PE=1 SV=3	RPS6B	28162	21	55.02	20	0.19588	0.25396	29.3597	29.5987	29.1109	29.5777	29.6089	29.4704
PTN2A_ARATH	sp|Q9LT75|PTN2A_ARATH Phosphatidylinositol 3,4,5-trisphosphate 3-phosphatase and protein-tyrosine-phosphatase PTEN2A OS=Arabidopsis thaliana OX=3702 GN=PTEN2A PE=1 SV=1	PTEN2A	66430	17	31.75	16	0.195145	0.292079	26.3075	26.223	26.4505	26.7847	26.2533	26.5284
BADH1_ARATH	sp|Q9S795|BADH1_ARATH Aminoaldehyde dehydrogenase ALDH10A8, chloroplastic OS=Arabidopsis thaliana OX=3702 GN=ALDH10A8 PE=1 SV=1	ALDH10A8	54432	23	63.87	18	0.19514	0.109715	27.9128	27.8581	27.8988	28.1796	28.0245	28.051
NTF2B_ARATH	sp|Q9C7F5|NTF2B_ARATH Nuclear transport factor 2B OS=Arabidopsis thaliana OX=3702 GN=NTF2B PE=1 SV=1	NTF2B	14002	7	68.25	7	0.194203	0.296942	25.5881	25.2074	25.637	25.8694	25.6004	25.5453
R27A3_ARATH	sp|P49637|R27A3_ARATH 60S ribosomal protein L27a-3 OS=Arabidopsis thaliana OX=3702 GN=RPL27AC PE=2 SV=2	RPL27AC	16455	10	52.74	10	0.194122	0.244614	28.3082	28.5286	28.6378	28.8867	28.5806	28.5898
BGL37_ARATH	sp|Q9C5C2|BGL37_ARATH Myrosinase 2 OS=Arabidopsis thaliana OX=3702 GN=TGG2 PE=1 SV=1	TGG2	62732	50	67.46	47	0.193892	0.152674	31.6552	31.5926	31.3898	31.7464	31.6899	31.7831
TOL3_ARATH	sp|Q9LPL6|TOL3_ARATH TOM1-like protein 3 OS=Arabidopsis thaliana OX=3702 GN=TOL3 PE=1 SV=1	TOL3	55791	5	13.83	2	0.193096	0.372694	22.8066	23.278	23.0115	22.9309	23.4866	23.2578
PPOC_ARATH	sp|P55826|PPOC_ARATH Protoporphyrinogen oxidase 1, chloroplastic OS=Arabidopsis thaliana OX=3702 GN=PPOX1 PE=1 SV=1	PPOX1	57695	14	40.97	12	0.192956	0.153792	25.6371	25.6438	25.577	25.7016	25.7639	25.9712
Y1099_ARATH	sp|Q681Y3|Y1099_ARATH Putative transferase At1g60990, chloroplastic OS=Arabidopsis thaliana OX=3702 GN=At1g60990 PE=1 SV=1	At1g60990	47009	2	5.56	2	0.192912	0.596785	21.6905	22.1358	21.5326	22.1927	22.4572	21.2877
AUXI2_ARATH	sp|Q0WQ57|AUXI2_ARATH Auxilin-related protein 2 OS=Arabidopsis thaliana OX=3702 GN=At4g12770 PE=1 SV=1	At4g12770	98327	5	5.95	4	0.192438	0.68367	22.0116	21.5124	22.6824	22.0341	23.0433	21.7063
A0A5S9XE27_ARATH	tr|A0A5S9XE27|A0A5S9XE27_ARATH Uncharacterized protein OS=Arabidopsis thaliana OX=3702 GN=C24_LOCUS13270 PE=3 SV=1	C24_LOCUS13270	58206	10	19.69	8	0.192242	0.313841	25.3751	24.884	25.1117	25.2044	25.5229	25.2201
SYFB_ARATH	sp|Q9SGE9|SYFB_ARATH Phenylalanine--tRNA ligase beta subunit, cytoplasmic OS=Arabidopsis thaliana OX=3702 GN=At1g72550 PE=2 SV=1	At1g72550	67543	27	50.5	22	0.192141	0.24539	26.6616	26.6053	27.0331	26.9013	27.0076	26.9675
A0A178W1Q7_ARATH	tr|A0A178W1Q7|A0A178W1Q7_ARATH Uncharacterized protein OS=Arabidopsis thaliana OX=3702 GN=AXX17_At1g04680 PE=4 SV=1	AXX17_At1g04680	40785	3	11.05	2	0.191441	0.75026	23.0718	21.3354	23.5652	22.9468	22.8096	22.7903
TCP22_ARATH	sp|Q9C7G4|TCP22_ARATH Transcription factor TCP22 OS=Arabidopsis thaliana OX=3702 GN=TCP22 PE=2 SV=1	TCP22	39599	2	6.93	2	0.190588	0.633341	21.8065	22.3787	23.1483	23.0042	22.6062	22.2948
ILVD_ARATH	sp|Q9LIR4|ILVD_ARATH Dihydroxy-acid dehydratase, chloroplastic OS=Arabidopsis thaliana OX=3702 GN=DHAD PE=1 SV=1	DHAD	64914	32	60.69	28	0.190345	0.244303	27.6274	27.69	27.5838	28.044	27.8387	27.5895
PHOT1_ARATH	sp|O48963|PHOT1_ARATH Phototropin-1 OS=Arabidopsis thaliana OX=3702 GN=PHOT1 PE=1 SV=1	PHOT1	111689	22	29.22	19	0.189923	0.569051	24.605	25.6054	25.6564	25.5393	25.2635	25.6338
CLPC1_ARATH	sp|Q9FI56|CLPC1_ARATH Chaperone protein ClpC1, chloroplastic OS=Arabidopsis thaliana OX=3702 GN=CLPC1 PE=1 SV=1	CLPC1	103453	82	65.98	75	0.189916	0.11409	30.5151	30.4622	30.3653	30.6458	30.6053	30.6613
IDH6_ARATH	sp|Q8LG77|IDH6_ARATH Isocitrate dehydrogenase [NAD] catalytic subunit 6, mitochondrial OS=Arabidopsis thaliana OX=3702 GN=IDH6 PE=1 SV=2	IDH6	40576	20	47.33	9	0.189395	0.232488	25.9335	25.5641	25.8602	26.0587	26.0055	25.8618
RL261_ARATH	sp|P51414|RL261_ARATH 60S ribosomal protein L26-1 OS=Arabidopsis thaliana OX=3702 GN=RPL26A PE=2 SV=2	RPL26A	16945	17	55.48	17	0.189327	0.262905	28.1823	28.5482	28.2229	28.6555	28.5063	28.3596
SODC1_ARATH	sp|P24704|SODC1_ARATH Superoxide dismutase [Cu-Zn] 1 OS=Arabidopsis thaliana OX=3702 GN=CSD1 PE=1 SV=2	CSD1	15098	8	98.03	7	0.188791	0.264368	28.1598	28.583	28.333	28.6688	28.4096	28.5638
A0A178UYP5_ARATH	tr|A0A178UYP5|A0A178UYP5_ARATH (thale cress) hypothetical protein OS=Arabidopsis thaliana OX=3702 GN=At4g30010 PE=4 SV=1	At4g30010	10439	5	30	4	0.188589	0.22211	25.5921	25.9357	25.9184	25.9667	26.0939	25.9514
ACCH6_ARATH	sp|P93824|ACCH6_ARATH 1-aminocyclopropane-1-carboxylate oxidase homolog 6 OS=Arabidopsis thaliana OX=3702 GN=At1g04350 PE=2 SV=1	At1g04350	40797	2	11.94	1	0.188377	0.436667	21.751	21.4034	22.0657	22.219	21.6949	21.8714
CSK22_ARATH	sp|Q08466|CSK22_ARATH Casein kinase II subunit alpha-2 OS=Arabidopsis thaliana OX=3702 GN=CKA2 PE=1 SV=3	CKA2	47233	9	26.3	5	0.188326	0.656725	24.4604	22.9001	24.0019	24.107	23.9631	23.8572
A0A7G2FEI6_ARATH	tr|A0A7G2FEI6|A0A7G2FEI6_ARATH (thale cress) hypothetical protein OS=Arabidopsis thaliana OX=3702 GN=AT9943_LOCUS19111 PE=4 SV=1	AT9943_LOCUS19111	102732	23	38.65	20	0.187956	0.149826	26.0241	25.7851	25.8924	26.1426	26.0415	26.0814
R18A3_ARATH	sp|Q9LUD4|R18A3_ARATH 60S ribosomal protein L18a-3 OS=Arabidopsis thaliana OX=3702 GN=RPL18AC PE=2 SV=1	RPL18AC	21309	7	31.46	1	0.187841	0.415564	22.8097	22.5057	22.4411	23.04	22.3803	22.8997
AMPD_ARATH	sp|O80452|AMPD_ARATH AMP deaminase OS=Arabidopsis thaliana OX=3702 GN=AMPD PE=1 SV=2	AMPD	95130	13	23.24	9	0.18764	0.513436	24.6927	24.2895	24.6721	24.2123	25.1261	24.8789
RL171_ARATH	sp|Q93VI3|RL171_ARATH 60S ribosomal protein L17-1 OS=Arabidopsis thaliana OX=3702 GN=RPL17A PE=2 SV=1	RPL17A	19897	13	56.82	13	0.187371	0.186239	28.2223	28.5	28.1953	28.499	28.4678	28.5129
GLTP1_ARATH	sp|O22797|GLTP1_ARATH Glycolipid transfer protein 1 OS=Arabidopsis thaliana OX=3702 GN=GLTP1 PE=2 SV=1	GLTP1	22740	9	50.5	8	0.187015	0.388692	24.6651	24.7865	24.8249	25.2076	25.0924	24.5376
HEM3_ARATH	sp|Q43316|HEM3_ARATH Porphobilinogen deaminase, chloroplastic OS=Arabidopsis thaliana OX=3702 GN=HEMC PE=1 SV=1	HEMC	41043	30	74.35	30	0.18682	0.167988	28.3456	28.5987	28.3719	28.6262	28.5716	28.6789
SAR1A_ARATH	sp|O04834|SAR1A_ARATH GTP-binding protein SAR1A OS=Arabidopsis thaliana OX=3702 GN=SAR1A PE=2 SV=1	SAR1A	22030	20	93.78	19	0.186691	0.24918	28.7033	28.9639	28.6361	28.7844	29	29.0789
FUM1_ARATH	sp|P93033|FUM1_ARATH Fumarate hydratase 1, mitochondrial OS=Arabidopsis thaliana OX=3702 GN=FUM1 PE=1 SV=2	FUM1	53000	25	59.55	22	0.186626	0.148262	28.2375	28.3442	28.158	28.4917	28.3381	28.4698
A0A178W1G6_ARATH	tr|A0A178W1G6|A0A178W1G6_ARATH BRCC36A OS=Arabidopsis thaliana OX=3702 GN=AXX17_At1g75070 PE=3 SV=1	AXX17_At1g75070	44412	2	10.84	1	0.186521	0.630186	20.8593	22.014	21.6823	21.6285	21.3135	22.1731
A0A178VEV3_ARATH	tr|A0A178VEV3|A0A178VEV3_ARATH EB_dh domain-containing protein OS=Arabidopsis thaliana OX=3702 GN=AXX17_At3g56650 PE=4 SV=1	AXX17_At3g56650	39885	3	12.47	1	0.186323	0.251343	21.2678	21.3564	21.3229	21.3168	21.7561	21.4332
AIM1_ARATH	sp|Q9ZPI6|AIM1_ARATH Peroxisomal fatty acid beta-oxidation multifunctional protein AIM1 OS=Arabidopsis thaliana OX=3702 GN=AIM1 PE=1 SV=1	AIM1	77858	36	62.97	32	0.186208	0.112049	27.6916	27.6517	27.5767	27.8514	27.8333	27.7938
TRXH2_ARATH	sp|Q38879|TRXH2_ARATH Thioredoxin H2 OS=Arabidopsis thaliana OX=3702 GN=TRX2 PE=1 SV=2	TRX2	14676	2	9.77	2	0.1855	0.688457	22.1425	22.0022	23.3031	23.0866	22.8519	22.0659
NB_ARATH	sp|O64527|NB_ARATH Peroxynitrite isomerase Rv2717c OS=Arabidopsis thaliana OX=3702 GN=At1g79260 PE=1 SV=1	At1g79260	18486	1	6.63	1	0.18548	0.571554	21.7292	20.7146	21.5722	21.4585	21.8267	21.2872
RAA2C_ARATH	sp|Q96283|RAA2C_ARATH Ras-related protein RABA2c OS=Arabidopsis thaliana OX=3702 GN=RABA2C PE=2 SV=4	RABA2C	23849	19	84.33	18	0.185406	0.190613	28.5746	28.3642	28.2615	28.6399	28.596	28.5206
LSM4_ARATH	sp|F4K4E3|LSM4_ARATH Sm-like protein LSM4 OS=Arabidopsis thaliana OX=3702 GN=LSM4 PE=1 SV=1	LSM4	14323	4	27.91	4	0.184223	0.30706	23.0471	23.4806	23.5638	23.5085	23.5556	23.5801
A0A7G2FMX3_ARATH	tr|A0A7G2FMX3|A0A7G2FMX3_ARATH (thale cress) hypothetical protein OS=Arabidopsis thaliana OX=3702 GN=AT9943_LOCUS22293 PE=3 SV=1	AT9943_LOCUS22293	101043	86	57.49	79	0.183485	0.145882	31.1017	30.9511	31.1598	31.2921	31.2145	31.2564
A0A178U9E1_ARATH	tr|A0A178U9E1|A0A178U9E1_ARATH Indole-3-glycerol-phosphate synthase OS=Arabidopsis thaliana OX=3702 GN=AXX17_At5g46750 PE=3 SV=1	AXX17_At5g46750	41968	16	60.95	12	0.183402	0.513802	24.9809	25.2152	24.6066	25.325	24.6465	25.3814
CDPKB_ARATH	sp|Q39016|CDPKB_ARATH Calcium-dependent protein kinase 11 OS=Arabidopsis thaliana OX=3702 GN=CPK11 PE=1 SV=2	CPK11	55916	9	23.43	9	0.183125	0.305442	25.2134	25.2369	25.579	25.7087	25.3391	25.5308
A0A178WJA0_ARATH	tr|A0A178WJA0|A0A178WJA0_ARATH Uncharacterized protein OS=Arabidopsis thaliana OX=3702 GN=AXX17_At1g56020 PE=4 SV=1	AXX17_At1g56020	34032	2	11.18	2	0.182509	0.544774	21.0215	21.1708	21.0148	21.7235	20.6496	21.3815
SDR2B_ARATH	sp|Q9ZUH5|SDR2B_ARATH Short-chain dehydrogenase/reductase 2b OS=Arabidopsis thaliana OX=3702 GN=SDR2b PE=1 SV=1	SDR2b	32850	4	14.86	3	0.182366	0.592296	22.192	22.5547	21.3569	22.1418	22.4179	22.091
SDHB1_ARATH	sp|Q8LBZ7|SDHB1_ARATH Succinate dehydrogenase [ubiquinone] iron-sulfur subunit 1, mitochondrial OS=Arabidopsis thaliana OX=3702 GN=SDH2-1 PE=1 SV=2	SDH2-1	31171	14	41.94	2	0.182196	0.168471	24.6507	24.5484	24.4735	24.7211	24.8552	24.6429
PME43_ARATH	sp|O23447|PME43_ARATH Putative pectinesterase/pectinesterase inhibitor 43 OS=Arabidopsis thaliana OX=3702 GN=PME43 PE=2 SV=1	PME43	78573	1	1	1	0.182005	0.589024	24.1236	24.3378	24.0011	24.9956	24.2146	23.7983
A0A178VXA7_ARATH	tr|A0A178VXA7|A0A178VXA7_ARATH DUF1279 domain-containing protein OS=Arabidopsis thaliana OX=3702 GN=AXX17_At2g23240 PE=4 SV=1	AXX17_At2g23240	21816	4	21.89	4	0.18198	0.579782	22.9641	23.2039	23.6639	23.0402	23.3243	24.0133
IDH5_ARATH	sp|Q945K7|IDH5_ARATH Isocitrate dehydrogenase [NAD] catalytic subunit 5, mitochondrial OS=Arabidopsis thaliana OX=3702 GN=IDH5 PE=1 SV=1	IDH5	40625	25	52.41	25	0.181542	0.231666	28.692	28.7217	28.9057	28.7644	29.0759	29.0237
PKP1_ARATH	sp|Q9LIK0|PKP1_ARATH Plastidial pyruvate kinase 1, chloroplastic OS=Arabidopsis thaliana OX=3702 GN=PKP1 PE=1 SV=1	PKP1	65131	26	50.67	24	0.181509	0.271889	27.2819	27.2731	27.6175	27.491	27.7332	27.4927
ATPD_ARATH	sp|Q9SSS9|ATPD_ARATH ATP synthase subunit delta, chloroplastic OS=Arabidopsis thaliana OX=3702 GN=ATPD PE=1 SV=1	ATPD	25669	14	57.26	12	0.181494	0.525712	28.0628	27.5699	27.1761	28.0938	27.6936	27.566
A0A1I9LSH2_ARATH	tr|A0A1I9LSH2|A0A1I9LSH2_ARATH Carbohydrate-binding-like fold OS=Arabidopsis thaliana OX=3702 GN=At3g62360 PE=1 SV=1	At3g62360	129467	35	34	29	0.180923	0.149904	27.1494	27.0701	27.0886	27.2075	27.2391	27.4043
NMT1_ARATH	sp|Q9LTR9|NMT1_ARATH Glycylpeptide N-tetradecanoyltransferase 1 OS=Arabidopsis thaliana OX=3702 GN=NMT1 PE=1 SV=2	NMT1	49799	20	59.45	19	0.180829	0.21669	25.7694	26.0663	25.908	26.0529	26.0091	26.2241
BTF3L_ARATH	sp|Q9CAT7|BTF3L_ARATH Nascent polypeptide-associated complex subunit beta OS=Arabidopsis thaliana OX=3702 GN=At1g73230 PE=2 SV=1	At1g73230	18004	8	70.3	6	0.179932	0.373636	25.4602	25.9727	25.8206	26.1693	25.815	25.8091
AAE17_ARATH	sp|F4KBF3|AAE17_ARATH Probable acyl-activating enzyme 17, peroxisomal OS=Arabidopsis thaliana OX=3702 GN=AAE17 PE=2 SV=1	AAE17	79181	9	16.23	5	0.178903	0.607086	24.328	24.2335	23.4591	23.7162	24.2304	24.6106
RS3A1_ARATH	sp|Q9CAV0|RS3A1_ARATH 40S ribosomal protein S3a-1 OS=Arabidopsis thaliana OX=3702 GN=RPS3AA PE=1 SV=3	RPS3AA	29851	33	72.9	33	0.178861	0.160147	29.4414	29.6139	29.659	29.7261	29.7281	29.7966
SGT1A_ARATH	sp|Q9SUR9|SGT1A_ARATH Protein SGT1 homolog A OS=Arabidopsis thaliana OX=3702 GN=SGT1A PE=1 SV=1	SGT1A	39225	3	10.86	1	0.178451	0.610114	21.7087	21.5631	22.0408	22.536	21.3148	21.9971
COPDA_ARATH	sp|Q949P2|COPDA_ARATH Probable cytosolic oligopeptidase A OS=Arabidopsis thaliana OX=3702 GN=CYOP PE=1 SV=1	CYOP	79044	40	75.32	15	0.178241	0.229	25.7229	25.4529	25.781	25.889	25.8659	25.7368
SYHC_ARATH	sp|F4IYF8|SYHC_ARATH Histidine--tRNA ligase, cytoplasmic OS=Arabidopsis thaliana OX=3702 GN=At3g02760 PE=2 SV=1	At3g02760	97537	32	44.96	27	0.178156	0.513481	26.0601	26.5582	26.8797	26.8603	26.3657	26.8065
CISY4_ARATH	sp|P20115|CISY4_ARATH Citrate synthase 4, mitochondrial OS=Arabidopsis thaliana OX=3702 GN=CSY4 PE=1 SV=3	CSY4	52782	31	66.24	30	0.178113	0.20578	28.8719	28.8009	28.6826	28.8153	29.0958	28.9787
CNX1_ARATH	sp|Q39054|CNX1_ARATH Molybdopterin biosynthesis protein CNX1 OS=Arabidopsis thaliana OX=3702 GN=CNX1 PE=1 SV=2	CNX1	71279	8	17.01	7	0.177876	0.521092	23.6135	23.7855	22.9051	23.4754	23.8304	23.5319
RAC1_ARATH	sp|Q38902|RAC1_ARATH Rac-like GTP-binding protein ARAC1 OS=Arabidopsis thaliana OX=3702 GN=ARAC1 PE=1 SV=1	ARAC1	21530	5	29.95	5	0.177749	0.215071	23.38	23.618	23.6901	23.676	23.7226	23.8227
NACA1_ARATH	sp|Q9LHG9|NACA1_ARATH Nascent polypeptide-associated complex subunit alpha-like protein 1 OS=Arabidopsis thaliana OX=3702 GN=At3g12390 PE=1 SV=1	At3g12390	21982	13	68.47	12	0.177023	0.207759	27.5094	27.6115	27.8306	27.8753	27.8178	27.7895
RB45A_ARATH	sp|Q9FPJ8|RB45A_ARATH Polyadenylate-binding protein RBP45A OS=Arabidopsis thaliana OX=3702 GN=RBP45A PE=2 SV=1	RBP45A	42324	7	24.55	6	0.176997	0.507087	23.7446	23.8859	24.4439	24.2231	24.4991	23.8832
VP35A_ARATH	sp|Q7X659|VP35A_ARATH Vacuolar protein sorting-associated protein 35A OS=Arabidopsis thaliana OX=3702 GN=VPS35A PE=1 SV=1	VPS35A	89493	21	38.37	19	0.176241	0.132584	25.8847	25.9462	25.8374	26.0786	26.1071	26.0112
Q7M1W7_ARATH	tr|Q7M1W7|Q7M1W7_ARATH Protein QA100047 (Fragment) OS=Arabidopsis thaliana OX=3702 PE=1 SV=1		1770	1	62.5	1	0.17603	0.507733	22.0576	21.8687	21.21	22.0938	21.7754	21.7952
SNAG_ARATH	sp|Q9SPE5|SNAG_ARATH Gamma-soluble NSF attachment protein OS=Arabidopsis thaliana OX=3702 GN=GSNAP PE=2 SV=1	GSNAP	32360	9	43.99	8	0.175054	0.194993	25.0804	25.0589	25.3015	25.2846	25.2766	25.4047
ENO3_ARATH	sp|Q9ZW34|ENO3_ARATH Cytosolic enolase 3 OS=Arabidopsis thaliana OX=3702 GN=ENO3 PE=1 SV=1	ENO3	51600	13	38.95	10	0.174521	0.517524	24.4024	24.7218	24.4956	24.7287	25.1668	24.2478
A0A178WDK8_ARATH	tr|A0A178WDK8|A0A178WDK8_ARATH (thale cress) hypothetical protein OS=Arabidopsis thaliana OX=3702 GN=AXX17_At1g22490 PE=4 SV=1	AXX17_At1g22490	36321	20	49.4	20	0.17448	0.220258	28.9206	28.8421	28.6681	28.9223	29.1234	28.9086
TIC62_ARATH	sp|Q8H0U5|TIC62_ARATH Protein TIC 62, chloroplastic OS=Arabidopsis thaliana OX=3702 GN=TIC62 PE=1 SV=1	TIC62	68342	16	39.63	14	0.174379	0.214889	26.6092	26.4637	26.704	26.8914	26.6502	26.7584
CATB3_ARATH	sp|Q94K85|CATB3_ARATH Cathepsin B-like protease 3 OS=Arabidopsis thaliana OX=3702 GN=CATHB3 PE=1 SV=1	CATHB3	39418	10	33.15	9	0.174028	0.313936	26.1508	26.3346	26.3408	26.6911	26.2121	26.445
A0A178WJH7_ARATH	tr|A0A178WJH7|A0A178WJH7_ARATH Uncharacterized protein OS=Arabidopsis thaliana OX=3702 GN=AXX17_At1g71250 PE=4 SV=1	AXX17_At1g71250	169356	1	0.59	1	0.173941	0.441587	24.5589	23.8702	24.4561	24.5285	24.329	24.5495
AMPL2_ARATH	sp|Q944P7|AMPL2_ARATH Leucine aminopeptidase 2, chloroplastic OS=Arabidopsis thaliana OX=3702 GN=LAP2 PE=2 SV=2	LAP2	61307	32	67.07	19	0.173929	0.437934	27.6139	27.303	27.133	27.2723	27.4431	27.8563
UBP6_ARATH	sp|Q949Y0|UBP6_ARATH Ubiquitin carboxyl-terminal hydrolase 6 OS=Arabidopsis thaliana OX=3702 GN=UBP6 PE=1 SV=1	UBP6	53696	18	46.27	17	0.173629	0.35233	26.9475	26.7251	26.4992	27.118	26.7421	26.8326
RS131_ARATH	sp|P59223|RS131_ARATH 40S ribosomal protein S13-1 OS=Arabidopsis thaliana OX=3702 GN=RPS13A PE=2 SV=1	RPS13A	17095	13	64.24	2	0.173477	0.469383	25.13	25.3644	24.9357	25.2914	25.6924	24.9668
RS72_ARATH	sp|Q9M885|RS72_ARATH 40S ribosomal protein S7-2 OS=Arabidopsis thaliana OX=3702 GN=RPS7B PE=2 SV=1	RPS7B	22196	22	70.68	18	0.172798	0.261661	27.1415	26.7594	27.1021	27.1431	27.1858	27.1925
A0A178UHH2_ARATH	tr|A0A178UHH2|A0A178UHH2_ARATH Ribonucloprotein OS=Arabidopsis thaliana OX=3702 GN=At5g20160 PE=3 SV=1	At5g20160	13897	2	26.56	2	0.172765	0.604394	22.5949	23.0543	22.5891	22.8942	23.4959	22.3665
DPM1_ARATH	sp|Q9LM93|DPM1_ARATH Dolichol-phosphate mannosyltransferase subunit 1 OS=Arabidopsis thaliana OX=3702 GN=DPMS1 PE=1 SV=1	DPMS1	27676	6	34.96	4	0.172486	0.743366	23.084	22.1583	23.4399	22.5658	22.6668	23.9671
GUN22_ARATH	sp|Q9SVJ4|GUN22_ARATH Endoglucanase 22 OS=Arabidopsis thaliana OX=3702 GN=GH9B16 PE=3 SV=1	GH9B16	55019	2	3.44	1	0.172128	0.722435	24.4794	23.7493	22.6316	23.7128	23.7384	23.9256
ALFP1_ARATH	sp|Q9SJU4|ALFP1_ARATH Fructose-bisphosphate aldolase 1, chloroplastic OS=Arabidopsis thaliana OX=3702 GN=FBA1 PE=1 SV=2	FBA1	42931	40	72.93	19	0.172035	0.165125	29.7675	29.9041	29.7377	30.0513	29.9336	29.9405
QCR71_ARATH	sp|Q9SUU5|QCR71_ARATH Cytochrome b-c1 complex subunit 7-1, mitochondrial OS=Arabidopsis thaliana OX=3702 GN=QCR7-1 PE=1 SV=1	QCR7-1	14527	11	53.28	11	0.171823	0.264854	26.4567	26.8116	26.6159	26.6788	26.9113	26.8095
DEGP2_ARATH	sp|O82261|DEGP2_ARATH Protease Do-like 2, chloroplastic OS=Arabidopsis thaliana OX=3702 GN=DEGP2 PE=1 SV=2	DEGP2	66802	21	47.12	17	0.170741	0.531301	26.3821	26.2315	25.4976	26.0805	26.1756	26.3673
MDAR1_ARATH	sp|Q9LFA3|MDAR1_ARATH Monodehydroascorbate reductase 1, peroxisomal OS=Arabidopsis thaliana OX=3702 GN=MDAR1 PE=1 SV=1	MDAR1	46487	35	81.11	35	0.170585	0.204585	29.8798	30.1002	29.8395	30.1062	30.0546	30.1705
RK6_ARATH	sp|O23049|RK6_ARATH 50S ribosomal protein L6, chloroplastic OS=Arabidopsis thaliana OX=3702 GN=RPL6 PE=2 SV=1	RPL6	24706	14	58.3	13	0.170421	0.245322	26.9683	27.0839	26.949	27.0921	27.0471	27.3733
GALDH_ARATH	sp|O81884|GALDH_ARATH L-galactose dehydrogenase OS=Arabidopsis thaliana OX=3702 GN=LGALDH PE=1 SV=1	LGALDH	34532	7	43.57	6	0.170338	0.489187	24.0212	23.7912	23.8331	23.6871	23.9587	24.5107
2A5D_ARATH	sp|Q9ZQY6|2A5D_ARATH Serine/threonine protein phosphatase 2A 55 kDa regulatory subunit B' delta isoform OS=Arabidopsis thaliana OX=3702 GN=B'DELTA PE=1 SV=1	B'DELTA	55240	8	21.38	6	0.170155	0.320006	24.3242	24.2127	23.8528	24.3842	24.224	24.292
PETS_ARATH	sp|Q9SZD6|PETS_ARATH Polyprotein of EF-Ts, chloroplastic OS=Arabidopsis thaliana OX=3702 GN=PETs PE=1 SV=1	PETs	103782	33	43.23	31	0.169863	0.521021	27.2032	27.6343	26.8177	27.5929	27.1128	27.4591
BXL1_ARATH	sp|Q9FGY1|BXL1_ARATH Beta-D-xylosidase 1 OS=Arabidopsis thaliana OX=3702 GN=BXL1 PE=1 SV=1	BXL1	83524	35	56.59	32	0.169583	0.195676	28.7916	28.7935	28.7331	28.8414	28.8888	29.0967
RHD3_ARATH	sp|P93042|RHD3_ARATH Protein ROOT HAIR DEFECTIVE 3 OS=Arabidopsis thaliana OX=3702 GN=RHD3 PE=1 SV=1	RHD3	89092	39	54.99	33	0.168918	0.212102	28.0718	28.0943	27.8323	28.1235	28.1506	28.231
REP_ARATH	sp|Q8LLD4|REP_ARATH Rab escort protein 1 OS=Arabidopsis thaliana OX=3702 GN=REP PE=1 SV=2	REP	61511	3	8.88	3	0.168813	0.761803	22.538	22.643	20.8424	21.7552	22.2344	22.5403
A0A5S9WUS1_ARATH	tr|A0A5S9WUS1|A0A5S9WUS1_ARATH Prolyl endopeptidase OS=Arabidopsis thaliana OX=3702 GN=At1g76140 PE=3 SV=1	At1g76140	82240	21	47.33	18	0.168795	0.160581	26.1394	26.2378	26.1834	26.4056	26.2613	26.4
APS1_ARATH	sp|Q9LIK9|APS1_ARATH ATP sulfurylase 1, chloroplastic OS=Arabidopsis thaliana OX=3702 GN=APS1 PE=1 SV=1	APS1	51459	49	79.27	47	0.168477	0.212933	29.6685	29.9538	29.9055	29.978	30.0292	30.026
RR11_ARATH	sp|P56802|RR11_ARATH 30S ribosomal protein S11, chloroplastic OS=Arabidopsis thaliana OX=3702 GN=rps11 PE=3 SV=1	rps11	15024	5	34.06	5	0.168418	0.260209	25.078	25.2493	25.0388	25.1287	25.2818	25.4609
A0A178VCB8_ARATH	tr|A0A178VCB8|A0A178VCB8_ARATH Eukaryotic translation initiation factor 3 subunit G OS=Arabidopsis thaliana OX=3702 GN=AXX17_At3g11290 PE=3 SV=1	AXX17_At3g11290	32629	9	44.9	8	0.168402	0.335243	25.736	25.5464	25.2819	25.816	25.5351	25.7184
CSTR3_ARATH	sp|Q9C5H6|CSTR3_ARATH CMP-sialic acid transporter 3 OS=Arabidopsis thaliana OX=3702 GN=UTR6 PE=2 SV=1	UTR6	44541	1	4.2	1	0.16826	0.164244	20.7835	20.8474	20.8997	20.9304	21.0144	21.0906
A0A1P8ARB7_ARATH	tr|A0A1P8ARB7|A0A1P8ARB7_ARATH Transcription regulator OS=Arabidopsis thaliana OX=3702 GN=At1g02080 PE=1 SV=1	At1g02080	263892	21	13.92	18	0.168049	0.441803	25.3732	25.1694	24.8008	25.4495	25.3867	25.0113
PFPA1_ARATH	sp|Q9SYP2|PFPA1_ARATH Pyrophosphate--fructose 6-phosphate 1-phosphotransferase subunit alpha 1 OS=Arabidopsis thaliana OX=3702 GN=PFP-ALPHA1 PE=1 SV=1	PFP-ALPHA1	67119	40	77.69	36	0.167023	0.243854	28.2626	28.6031	28.4574	28.648	28.5358	28.6403
TBCB_ARATH	sp|Q67Z52|TBCB_ARATH Tubulin-folding cofactor B OS=Arabidopsis thaliana OX=3702 GN=TFCB PE=1 SV=1	TFCB	27331	4	33.33	1	0.166929	0.644257	21.1448	21.4377	22.0952	21.7393	21.2386	22.2006
A0A178VI36_ARATH	tr|A0A178VI36|A0A178VI36_ARATH Uncharacterized protein OS=Arabidopsis thaliana OX=3702 GN=AXX17_At3g35600 PE=4 SV=1	AXX17_At3g35600	33180	1	3.14	1	0.166691	0.793067	24.38	26.6179	25.8567	26.2538	25.8483	25.2526
THI4_ARATH	sp|Q38814|THI4_ARATH Thiamine thiazole synthase, chloroplastic OS=Arabidopsis thaliana OX=3702 GN=THI1 PE=1 SV=1	THI1	36664	19	57.59	18	0.166625	0.640714	27.468	28.6549	27.6626	28.0494	28.3391	27.8968
KEULE_ARATH	sp|Q9C5X3|KEULE_ARATH SNARE-interacting protein KEULE OS=Arabidopsis thaliana OX=3702 GN=KEU PE=1 SV=2	KEU	75083	13	22.67	1	0.16535	0.491846	19.463	18.9891	19.5555	19.7783	19.5381	19.1873
RS112_ARATH	sp|O65569|RS112_ARATH 40S ribosomal protein S11-2 OS=Arabidopsis thaliana OX=3702 GN=RPS11B PE=2 SV=2	RPS11B	17931	10	43.4	2	0.165198	0.505489	21.891	21.7542	22.0339	22.2596	21.5764	22.3387
CSCLD_ARATH	sp|Q9C8G5|CSCLD_ARATH CSC1-like protein ERD4 OS=Arabidopsis thaliana OX=3702 GN=ERD4 PE=1 SV=1	ERD4	81935	40	51.66	38	0.164266	0.316099	28.7325	28.8527	28.4052	28.8576	28.7499	28.8757
EIF3A_ARATH	sp|Q9LD55|EIF3A_ARATH Eukaryotic translation initiation factor 3 subunit A OS=Arabidopsis thaliana OX=3702 GN=TIF3A1 PE=1 SV=1	TIF3A1	114300	49	55.02	48	0.164179	0.312819	28.5721	28.1377	28.1985	28.5086	28.4349	28.4573
PSMF1_ARATH	sp|Q9M330|PSMF1_ARATH Probable proteasome inhibitor OS=Arabidopsis thaliana OX=3702 GN=At3g53970 PE=1 SV=1	At3g53970	32117	3	17.55	3	0.164133	0.773533	23.4714	23.444	21.8029	22.545	22.9883	23.6773
A0A5S9X7G8_ARATH	tr|A0A5S9X7G8|A0A5S9X7G8_ARATH RNase H type-1 domain-containing protein OS=Arabidopsis thaliana OX=3702 GN=C24_LOCUS11007 PE=4 SV=1	C24_LOCUS11007	16246	1	5.07	1	0.164098	0.567863	22.9692	22.7688	23.3957	23.128	23.6624	22.8356
RGGC_ARATH	sp|Q9LVT8|RGGC_ARATH RGG repeats nuclear RNA binding protein C OS=Arabidopsis thaliana OX=3702 GN=RGGC PE=1 SV=1	RGGC	37999	22	61.9	22	0.16392	0.294013	27.9153	27.6298	28.0567	27.9938	28.0318	28.0679
BSK1_ARATH	sp|Q944A7|BSK1_ARATH Serine/threonine-protein kinase BSK1 OS=Arabidopsis thaliana OX=3702 GN=BSK1 PE=1 SV=1	BSK1	56818	19	55.27	16	0.163486	0.400973	26.2466	25.9291	26.4375	26.1773	26.3697	26.5567
COG3_ARATH	sp|F4HQ84|COG3_ARATH Conserved oligomeric Golgi complex subunit 3 OS=Arabidopsis thaliana OX=3702 GN=COG3 PE=1 SV=1	COG3	88609	8	11.35	6	0.163406	0.702165	23.1727	22.6557	23.0677	22.8193	24.0098	22.5571
BIG3_ARATH	sp|Q9LPC5|BIG3_ARATH Brefeldin A-inhibited guanine nucleotide-exchange protein 3 OS=Arabidopsis thaliana OX=3702 GN=BIG3 PE=1 SV=1	BIG3	194943	28	19.6	20	0.163056	0.616628	26.1978	25.3519	25.0211	25.7442	25.6293	25.6866
A0A178WIX4_ARATH	tr|A0A178WIX4|A0A178WIX4_ARATH Uncharacterized protein OS=Arabidopsis thaliana OX=3702 GN=At1g01800 PE=3 SV=1	At1g01800	31660	13	60.68	13	0.163011	0.48222	26.4196	25.9146	25.8425	26.3497	26.3899	25.9261
A0A178UBA5_ARATH	tr|A0A178UBA5|A0A178UBA5_ARATH Uncharacterized protein OS=Arabidopsis thaliana OX=3702 GN=AXX17_At5g24930 PE=4 SV=1	AXX17_At5g24930	82339	7	15.08	4	0.162897	0.626046	21.4323	22.0226	22.01	21.3782	22.2205	22.3549
PAB_ARATH	sp|Q94JY0|PAB_ARATH Protein IN CHLOROPLAST ATPASE BIOGENESIS, chloroplastic OS=Arabidopsis thaliana OX=3702 GN=PAB PE=1 SV=1	PAB	36909	11	37.88	10	0.162571	0.396001	25.9486	25.8014	25.4794	25.908	26.1038	25.7054
RAA4A_ARATH	sp|Q9FJN8|RAA4A_ARATH Ras-related protein RABA4a OS=Arabidopsis thaliana OX=3702 GN=RABA4A PE=1 SV=1	RABA4A	24842	16	64.16	13	0.162382	0.184933	27.045	27.0813	26.8929	27.1906	27.1186	27.1972
SGAT_ARATH	sp|Q56YA5|SGAT_ARATH Serine--glyoxylate aminotransferase OS=Arabidopsis thaliana OX=3702 GN=AGT1 PE=1 SV=2	AGT1	44208	30	88.03	29	0.161631	0.324899	29.3853	29.6735	29.1992	29.604	29.5309	29.6079
A0A178W7I6_ARATH	tr|A0A178W7I6|A0A178W7I6_ARATH Uncharacterized protein OS=Arabidopsis thaliana OX=3702 GN=AXX17_At1g08020 PE=4 SV=1	AXX17_At1g08020	31087	3	13.87	1	0.160676	0.285106	20.8958	20.7923	20.7733	21.1554	20.7724	21.0156
C71BJ_ARATH	sp|Q9LTM4|C71BJ_ARATH Cytochrome P450 71B19 OS=Arabidopsis thaliana OX=3702 GN=CYP71B19 PE=1 SV=1	CYP71B19	57519	1	2.59	1	0.160313	0.641238	21.3107	21.4793	21.5405	22.1051	21.8199	20.8864
NCBP1_ARATH	sp|Q9SIU2|NCBP1_ARATH Nuclear cap-binding protein subunit 1 OS=Arabidopsis thaliana OX=3702 GN=ABH1 PE=1 SV=2	ABH1	96548	7	12.62	5	0.160284	0.563392	24.676	24.6401	23.9002	24.4031	24.8594	24.4347
UBP1C_ARATH	sp|Q9LJH8|UBP1C_ARATH Oligouridylate-binding protein 1C OS=Arabidopsis thaliana OX=3702 GN=UBP1C PE=1 SV=1	UBP1C	47089	12	34.43	9	0.160037	0.282279	25.6671	25.725	25.7949	26.0092	25.6698	25.9881
CALM1_ARATH	sp|P0DH95|CALM1_ARATH Calmodulin-1 OS=Arabidopsis thaliana OX=3702 GN=CAM1 PE=1 SV=1	CAM1	16862	10	70.47	8	0.159993	0.254446	26.3868	26.2744	26.1317	26.4417	26.5342	26.297
GBLPA_ARATH	sp|O24456|GBLPA_ARATH Receptor for activated C kinase 1A OS=Arabidopsis thaliana OX=3702 GN=RACK1A PE=1 SV=2	RACK1A	35748	34	85.32	33	0.159846	0.155066	30.0191	30.0738	30.0127	30.1727	30.1689	30.2436
RL282_ARATH	sp|Q9M0E2|RL282_ARATH 60S ribosomal protein L28-2 OS=Arabidopsis thaliana OX=3702 GN=RPL28C PE=2 SV=1	RPL28C	15911	8	48.25	7	0.159703	0.243077	26.6765	26.8933	26.6974	26.8478	27.0443	26.8542
HIS2_ARATH	sp|O82768|HIS2_ARATH Histidine biosynthesis bifunctional protein hisIE, chloroplastic OS=Arabidopsis thaliana OX=3702 GN=HISN2 PE=1 SV=1	HISN2	31668	12	45.55	11	0.159357	0.41651	25.7999	25.4222	25.6253	25.7804	26.0351	25.5099
A0A178W7Y8_ARATH	tr|A0A178W7Y8|A0A178W7Y8_ARATH DUF569 domain-containing protein OS=Arabidopsis thaliana OX=3702 GN=At1g59710 PE=1 SV=1	At1g59710	33579	4	20.67	4	0.158886	0.444415	23.3532	23.1374	23.6835	23.7877	23.3581	23.505
PSMD4_ARATH	sp|P55034|PSMD4_ARATH 26S proteasome non-ATPase regulatory subunit 4 homolog OS=Arabidopsis thaliana OX=3702 GN=RPN10 PE=1 SV=1	RPN10	40757	11	31.87	11	0.15872	0.366434	27.2317	26.7017	26.9431	27.0422	27.167	27.1435
IPYR1_ARATH	sp|Q93V56|IPYR1_ARATH Soluble inorganic pyrophosphatase 1 OS=Arabidopsis thaliana OX=3702 GN=PPA1 PE=1 SV=1	PPA1	24484	10	56.13	1	0.158696	0.483618	23.1715	22.8052	23.3967	23.2731	23.5458	23.0306
CLPP1_ARATH	sp|P56772|CLPP1_ARATH Chloroplastic ATP-dependent Clp protease proteolytic subunit 1 OS=Arabidopsis thaliana OX=3702 GN=clpP1 PE=1 SV=2	clpP1	22124	5	30.61	5	0.158517	0.317852	25.753	25.9283	25.531	25.977	25.9437	25.7671
RS143_ARATH	sp|P42036|RS143_ARATH 40S ribosomal protein S14-3 OS=Arabidopsis thaliana OX=3702 GN=RPS14C PE=2 SV=2	RPS14C	16238	12	61.33	12	0.15837	0.262769	28.7286	28.9865	28.7042	28.9811	29.042	28.8713
RS281_ARATH	sp|Q9SR73|RS281_ARATH 40S ribosomal protein S28-1 OS=Arabidopsis thaliana OX=3702 GN=RPS28A PE=3 SV=1	RPS28A	7371	11	62.5	11	0.158367	0.170854	27.6464	27.6992	27.5555	27.8021	27.7633	27.8107
TRNHF_ARATH	sp|Q9LHT0|TRNHF_ARATH Tropinone reductase homolog At5g06060 OS=Arabidopsis thaliana OX=3702 GN=At5g06060 PE=2 SV=1	At5g06060	28292	16	70.45	15	0.158354	0.372583	27.1793	27.3101	26.7821	27.2905	27.2513	27.2047
KINGL_ARATH	sp|Q9CAR3|KINGL_ARATH SNF1-related protein kinase regulatory subunit gamma-1-like OS=Arabidopsis thaliana OX=3702 GN=CBSCBS2 PE=1 SV=1	CBSCBS2	47818	7	24.83	7	0.158072	0.554389	23.6589	23.9139	24.4978	23.94	24.2211	24.3837
14333_ARATH	sp|P42644|14333_ARATH 14-3-3-like protein GF14 psi OS=Arabidopsis thaliana OX=3702 GN=GRF3 PE=1 SV=2	GRF3	28606	34	90.2	30	0.156781	0.157066	30.2925	30.3646	30.299	30.4743	30.4903	30.462
PGL1A_ARATH	sp|Q8H112|PGL1A_ARATH PGR5-like protein 1A, chloroplastic OS=Arabidopsis thaliana OX=3702 GN=PGRL1A PE=1 SV=1	PGRL1A	35721	16	59.26	16	0.156716	0.168122	27.5632	27.671	27.5686	27.7661	27.7781	27.7287
SEC3A_ARATH	sp|Q9SX85|SEC3A_ARATH Exocyst complex component SEC3A OS=Arabidopsis thaliana OX=3702 GN=SEC3A PE=1 SV=1	SEC3A	100065	19	27.73	16	0.156393	0.41123	25.4598	25.8272	25.4271	25.977	25.5889	25.6175
TCPZB_ARATH	sp|Q8L7N0|TCPZB_ARATH T-complex protein 1 subunit zeta 2 OS=Arabidopsis thaliana OX=3702 GN=CCT6B PE=1 SV=1	CCT6B	58928	22	47.66	3	0.156067	0.313473	23.6457	23.2814	23.4985	23.6709	23.7258	23.4971
DNJ15_ARATH	sp|Q9ZSY2|DNJ15_ARATH Chaperone protein dnaJ 15 OS=Arabidopsis thaliana OX=3702 GN=ATJ15 PE=1 SV=1	ATJ15	45484	5	14.88	4	0.155901	0.609008	23.7376	22.7943	23.0865	23.6938	23.1287	23.2636
LPPD_ARATH	sp|Q9M2G7|LPPD_ARATH Lipid phosphate phosphatase delta OS=Arabidopsis thaliana OX=3702 GN=LPPD PE=2 SV=1	LPPD	46169	1	2.16	1	0.155473	0.389239	26.8644	26.7357	26.3396	26.894	26.785	26.7271
CYB5C_ARATH	sp|Q9ZNV4|CYB5C_ARATH Cytochrome B5 isoform C OS=Arabidopsis thaliana OX=3702 GN=CYTB5-C PE=1 SV=1	CYTB5-C	14873	4	38.64	4	0.155348	0.341972	25.675	25.7737	26.0636	26.1414	25.9561	25.8809
P23A_ARATH	sp|Q8L7U4|P23A_ARATH Co-chaperone protein p23-1 OS=Arabidopsis thaliana OX=3702 GN=P23-1 PE=1 SV=1	P23-1	25471	9	33.2	9	0.154777	0.207013	26.8853	27.0872	27.0386	27.2054	27.1251	27.1448
PDI52_ARATH	sp|Q94F09|PDI52_ARATH Protein disulfide-isomerase 5-2 OS=Arabidopsis thaliana OX=3702 GN=PDIL5-2 PE=1 SV=1	PDIL5-2	49851	16	42.27	15	0.154765	0.386967	26.898	26.5232	26.9795	27.0421	27.033	26.7899
MDHM1_ARATH	sp|Q9ZP06|MDHM1_ARATH Malate dehydrogenase 1, mitochondrial OS=Arabidopsis thaliana OX=3702 GN=At1g53240 PE=1 SV=1	At1g53240	35804	26	77.13	23	0.154723	0.230359	29.9483	30.1812	30.1569	30.1904	30.286	30.2743
PSAH1_ARATH	sp|Q9SUI7|PSAH1_ARATH Photosystem I reaction center subunit VI-1, chloroplastic OS=Arabidopsis thaliana OX=3702 GN=PSAH1 PE=2 SV=1	PSAH1	15217	9	60	4	0.154585	0.676109	22.7887	23.505	23.4932	23.6584	22.7646	23.8276
SERA3_ARATH	sp|Q9LT69|SERA3_ARATH D-3-phosphoglycerate dehydrogenase 3, chloroplastic OS=Arabidopsis thaliana OX=3702 GN=PGDH3 PE=1 SV=1	PGDH3	62122	13	25.68	6	0.154548	0.667102	24.5261	23.3503	24.4732	24.0982	24.3703	24.3447
XYLL3_ARATH	sp|Q0WWW9|XYLL3_ARATH D-xylose-proton symporter-like 3, chloroplastic OS=Arabidopsis thaliana OX=3702 GN=At5g59250 PE=1 SV=2	At5g59250	59829	2	3.58	2	0.154525	0.748604	24.3927	22.8468	24.0377	23.8395	23.4896	24.4117
A0A7G2DZD1_ARATH	tr|A0A7G2DZD1|A0A7G2DZD1_ARATH (thale cress) hypothetical protein OS=Arabidopsis thaliana OX=3702 GN=AT9943_LOCUS4395 PE=3 SV=1	AT9943_LOCUS4395	162857	2	1.7	1	0.154507	0.487007	21.8526	21.7495	21.3557	21.9509	21.4818	21.9885
AIG2B_ARATH	sp|Q9MBH2|AIG2B_ARATH Protein AIG2 B OS=Arabidopsis thaliana OX=3702 GN=AIG2B PE=2 SV=1	AIG2B	19465	17	87.57	16	0.154324	0.189538	28.0249	27.9352	27.8765	28.1525	28.0958	28.0514
14310_ARATH	sp|P48347|14310_ARATH 14-3-3-like protein GF14 epsilon OS=Arabidopsis thaliana OX=3702 GN=GRF10 PE=1 SV=1	GRF10	28915	32	90.94	28	0.154252	0.208782	29.4718	29.689	29.5937	29.7137	29.7269	29.7768
A0A178UDZ5_ARATH	tr|A0A178UDZ5|A0A178UDZ5_ARATH (thale cress) hypothetical protein OS=Arabidopsis thaliana OX=3702 GN=At5g08050 PE=1 SV=1	At5g08050	16580	4	22.78	4	0.153963	0.422383	26.9408	26.6578	26.3139	26.7731	26.8001	26.8012
CAB6_ARATH	sp|Q01667|CAB6_ARATH Chlorophyll a-b binding protein 6, chloroplastic OS=Arabidopsis thaliana OX=3702 GN=LHCA1 PE=1 SV=1	LHCA1	25996	7	27.8	7	0.1532	0.593946	28.0318	27.585	27.3376	28.1961	27.8116	27.4064
A0A178VE24_ARATH	tr|A0A178VE24|A0A178VE24_ARATH Uncharacterized protein OS=Arabidopsis thaliana OX=3702 GN=AXX17_At3g49610 PE=4 SV=1	AXX17_At3g49610	102800	1	0.67	1	0.153181	0.558098	23.3411	23.6336	23.0058	23.1176	23.4982	23.8241
SYIC_ARATH	sp|F4JLM5|SYIC_ARATH Isoleucine--tRNA ligase, cytoplasmic OS=Arabidopsis thaliana OX=3702 GN=At4g10320 PE=2 SV=1	At4g10320	135484	35	45.21	28	0.153068	0.22056	27.0022	26.8838	26.7674	27.0616	26.9933	27.0576
BI1_ARATH	sp|Q9LD45|BI1_ARATH Bax inhibitor 1 OS=Arabidopsis thaliana OX=3702 GN=BI-1 PE=1 SV=1	BI-1	27483	1	3.24	1	0.152657	0.805686	22.093	22.2847	21.369	21.2369	23.3352	21.6326
PMG1_ARATH	sp|O04499|PMG1_ARATH 2,3-bisphosphoglycerate-independent phosphoglycerate mutase 1 OS=Arabidopsis thaliana OX=3702 GN=PGM1 PE=1 SV=3	PGM1	60580	45	84.2	41	0.151963	0.20787	30.4881	30.552	30.3462	30.6051	30.6262	30.6109
DCUP1_ARATH	sp|Q93ZB6|DCUP1_ARATH Uroporphyrinogen decarboxylase 1, chloroplastic OS=Arabidopsis thaliana OX=3702 GN=HEME1 PE=2 SV=2	HEME1	46254	15	55.98	12	0.151899	0.401025	26.4655	26.5984	26.2076	26.707	26.6844	26.3358
MDAR2_ARATH	sp|Q93WJ8|MDAR2_ARATH Monodehydroascorbate reductase 2 OS=Arabidopsis thaliana OX=3702 GN=MDAR2 PE=1 SV=1	MDAR2	47480	32	83.45	32	0.150862	0.191883	28.89	28.8306	28.9437	28.9753	29.0508	29.0908
CP29A_ARATH	sp|Q43349|CP29A_ARATH 29 kDa ribonucleoprotein, chloroplastic OS=Arabidopsis thaliana OX=3702 GN=CP29A PE=2 SV=2	CP29A	36007	7	23.39	6	0.150221	0.847254	24.5155	26.0804	26.3227	24.4276	26.5414	26.4003
G6PD1_ARATH	sp|Q43727|G6PD1_ARATH Glucose-6-phosphate 1-dehydrogenase 1, chloroplastic OS=Arabidopsis thaliana OX=3702 GN=G6PD1 PE=1 SV=2	G6PD1	65428	15	28.12	14	0.150164	0.266105	25.8713	26.0515	26.1589	26.2107	26.0983	26.2233
DRG3_ARATH	sp|Q9SVA6|DRG3_ARATH Developmentally-regulated G-protein 3 OS=Arabidopsis thaliana OX=3702 GN=DRG3 PE=1 SV=1	DRG3	41144	13	46.07	12	0.150142	0.407454	25.4008	25.3077	25.3026	25.8051	25.3963	25.2601
PP13_ARATH	sp|P48483|PP13_ARATH Serine/threonine-protein phosphatase PP1 isozyme 3 OS=Arabidopsis thaliana OX=3702 GN=TOPP3 PE=1 SV=1	TOPP3	36215	1	4.66	1	0.150126	0.442709	21.1328	21.5401	20.9664	21.2745	21.299	21.5163
FBRL1_ARATH	sp|Q9FEF8|FBRL1_ARATH rRNA 2'-O-methyltransferase fibrillarin 1 OS=Arabidopsis thaliana OX=3702 GN=FIB1 PE=1 SV=1	FIB1	32830	16	51.62	15	0.149841	0.282916	25.9404	25.9844	26.2232	26.1041	26.2181	26.2754
ASPG1_ARATH	sp|Q9LS40|ASPG1_ARATH Protein ASPARTIC PROTEASE IN GUARD CELL 1 OS=Arabidopsis thaliana OX=3702 GN=ASPG1 PE=1 SV=1	ASPG1	53234	15	36.6	15	0.149215	0.244367	27.5363	27.4726	27.6304	27.5805	27.8043	27.7021
PRS7A_ARATH	sp|Q9SSB5|PRS7A_ARATH 26S proteasome regulatory subunit 7 homolog A OS=Arabidopsis thaliana OX=3702 GN=RPT1A PE=1 SV=1	RPT1A	47803	32	65.96	32	0.148722	0.33274	28.2963	28.115	28.1366	28.5541	28.2133	28.2267
CH20_ARATH	sp|O65282|CH20_ARATH 20 kDa chaperonin, chloroplastic OS=Arabidopsis thaliana OX=3702 GN=CPN20 PE=1 SV=2	CPN20	26802	17	69.57	16	0.148607	0.265739	28.5882	28.6083	28.4192	28.6444	28.5978	28.8193
A0A178UC08_ARATH	tr|A0A178UC08|A0A178UC08_ARATH Glucose-6-phosphate 1-epimerase OS=Arabidopsis thaliana OX=3702 GN=AXX17_At5g56580 PE=1 SV=1	AXX17_At5g56580	35447	11	41.03	10	0.148546	0.395372	26.3501	26.1595	26.405	26.3396	26.2906	26.73
RBG2_ARATH	sp|Q9SVM8|RBG2_ARATH Glycine-rich RNA-binding protein 2, mitochondrial OS=Arabidopsis thaliana OX=3702 GN=RBG2 PE=1 SV=1	RBG2	15702	4	25.95	4	0.148437	0.71882	23.4198	23.1435	23.145	24.2249	22.698	23.2308
GSOX3_ARATH	sp|Q9SXE1|GSOX3_ARATH Flavin-containing monooxygenase FMO GS-OX3 OS=Arabidopsis thaliana OX=3702 GN=FMOGS-OX3 PE=1 SV=1	FMOGS-OX3	52688	20	63.85	18	0.148184	0.58456	26.8028	27.6429	27.2357	27.2691	27.185	27.6719
SYKC_ARATH	sp|Q9ZPI1|SYKC_ARATH Lysine--tRNA ligase, cytoplasmic OS=Arabidopsis thaliana OX=3702 GN=At3g11710 PE=1 SV=1	At3g11710	70888	23	53.51	21	0.148139	0.289285	27.1665	27.3192	27.4619	27.5623	27.4611	27.3686
A0A1S5M0M6_ARATH	tr|A0A1S5M0M6|A0A1S5M0M6_ARATH Fructose-bisphosphatase OS=Arabidopsis thaliana OX=3702 GN=At5g64380 PE=3 SV=1	At5g64380	43976	6	15.1	5	0.147459	0.711825	22.1309	23.5284	23.0408	22.7892	23.0012	23.3521
SCP45_ARATH	sp|Q93Y09|SCP45_ARATH Serine carboxypeptidase-like 45 OS=Arabidopsis thaliana OX=3702 GN=SCPL45 PE=2 SV=1	SCPL45	51803	2	6.29	1	0.147338	0.487599	20.4593	20.6008	21.0085	21.0654	20.6152	20.83
PPD5_ARATH	sp|P82715|PPD5_ARATH PsbP domain-containing protein 5, chloroplastic OS=Arabidopsis thaliana OX=3702 GN=PPD5 PE=1 SV=3	PPD5	33365	11	42.09	10	0.147127	0.458478	26.1346	25.6544	26.0584	26.0823	26.3104	25.8961
TOCC_ARATH	sp|Q94FY7|TOCC_ARATH Tocopherol cyclase, chloroplastic OS=Arabidopsis thaliana OX=3702 GN=VTE1 PE=1 SV=1	VTE1	54721	8	19.06	8	0.14678	0.670842	24.542	24.1428	24.8747	24.1153	24.6908	25.1939
A0A178UQB5_ARATH	tr|A0A178UQB5|A0A178UQB5_ARATH Uncharacterized protein OS=Arabidopsis thaliana OX=3702 GN=AXX17_At5g12380 PE=4 SV=1	AXX17_At5g12380	96232	30	56.45	24	0.146459	0.473928	27.0628	27.0896	27.4909	27.1848	27.2525	27.6455
PR40A_ARATH	sp|B6EUA9|PR40A_ARATH Pre-mRNA-processing protein 40A OS=Arabidopsis thaliana OX=3702 GN=PRP40A PE=1 SV=1	PRP40A	109382	2	3.44	2	0.146159	0.81736	20.8666	22.5244	21.9737	22.2353	20.9137	22.6541
PS6AA_ARATH	sp|Q9SEI2|PS6AA_ARATH 26S proteasome regulatory subunit 6A homolog A OS=Arabidopsis thaliana OX=3702 GN=RPT5A PE=1 SV=1	RPT5A	47480	28	69.81	24	0.145909	0.339115	27.5935	27.8039	27.9796	27.9313	28.0358	27.8477
LEU32_ARATH	sp|P93832|LEU32_ARATH 3-isopropylmalate dehydrogenase 2, chloroplastic OS=Arabidopsis thaliana OX=3702 GN=IMDH2 PE=1 SV=1	IMDH2	43371	17	55.8	9	0.145905	0.465646	24.5738	25.1511	24.7159	25.0592	25.029	24.7903
PSB6_ARATH	sp|Q8LD27|PSB6_ARATH Proteasome subunit beta type-6 OS=Arabidopsis thaliana OX=3702 GN=PBA1 PE=1 SV=2	PBA1	25151	16	83.69	14	0.145635	0.262226	27.8928	27.9222	27.7905	28.0999	28.0746	27.868
UBP12_ARATH	sp|Q9FPT1|UBP12_ARATH Ubiquitin C-terminal hydrolase 12 OS=Arabidopsis thaliana OX=3702 GN=UBP12 PE=1 SV=2	UBP12	130607	57	65.41	52	0.144532	0.200397	28.2571	28.3513	28.2989	28.4374	28.5019	28.4015
A0A178UTP2_ARATH	tr|A0A178UTP2|A0A178UTP2_ARATH L-lactate dehydrogenase OS=Arabidopsis thaliana OX=3702 GN=At4g17260 PE=3 SV=1	At4g17260	37950	11	53.82	11	0.144463	0.370735	26.1449	26.1027	25.8055	25.9911	26.2807	26.2146
A0A178W6J0_ARATH	tr|A0A178W6J0|A0A178W6J0_ARATH (thale cress) hypothetical protein OS=Arabidopsis thaliana OX=3702 GN=At1g17100 PE=3 SV=1	At1g17100	25388	10	53.88	10	0.144264	0.32319	26.0078	25.9162	25.713	26.1404	25.89	26.0395
SIR_ARATH	sp|Q9LZ66|SIR_ARATH Assimilatory sulfite reductase (ferredoxin), chloroplastic OS=Arabidopsis thaliana OX=3702 GN=SIR PE=1 SV=1	SIR	71950	43	55.92	40	0.144143	0.212673	30.1663	30.0651	30.2078	30.3395	30.2529	30.2792
O04374_ARATH	tr|O04374|O04374_ARATH TATA binding protein-associated factor OS=Arabidopsis thaliana OX=3702 PE=2 SV=1		58887	1	1.9	1	0.144112	0.749381	24.3613	23.4825	22.6634	23.7204	23.7937	23.4254
A0A7G2DR48_ARATH	tr|A0A7G2DR48|A0A7G2DR48_ARATH Lactoylglutathione lyase OS=Arabidopsis thaliana OX=3702 GN=AT9943_LOCUS651 PE=3 SV=1	AT9943_LOCUS651	34923	13	52.88	12	0.144078	0.454966	25.7134	26.2283	25.8007	25.935	26.2379	26.0018
RS142_ARATH	sp|Q9CAX6|RS142_ARATH 40S ribosomal protein S14-2 OS=Arabidopsis thaliana OX=3702 GN=RPS14B PE=1 SV=1	RPS14B	16273	17	72.67	7	0.143771	0.407582	27.3463	27.6371	27.5548	27.6893	27.8641	27.416
IMB1_ARATH	sp|Q9FJD4|IMB1_ARATH Importin subunit beta-1 OS=Arabidopsis thaliana OX=3702 GN=KPNB1 PE=1 SV=1	KPNB1	96259	42	67.93	41	0.143767	0.284325	28.6415	28.8619	28.9057	28.8641	29.0109	28.9655
SNAA2_ARATH	sp|Q9SPE6|SNAA2_ARATH Alpha-soluble NSF attachment protein 2 OS=Arabidopsis thaliana OX=3702 GN=ASNAP2 PE=1 SV=1	ASNAP2	32755	20	75.78	20	0.143365	0.254272	27.3439	27.5485	27.4497	27.5975	27.5067	27.668
R18A2_ARATH	sp|P51418|R18A2_ARATH 60S ribosomal protein L18a-2 OS=Arabidopsis thaliana OX=3702 GN=RPL18AB PE=1 SV=2	RPL18AB	21307	21	67.98	1	0.143111	0.342745	24.5499	24.4136	24.3606	24.5874	24.7696	24.3964
PRS8A_ARATH	sp|Q9C5U3|PRS8A_ARATH 26S proteasome regulatory subunit 8 homolog A OS=Arabidopsis thaliana OX=3702 GN=RPT6A PE=1 SV=1	RPT6A	47248	40	76.85	34	0.143033	0.335913	28.1725	28.2622	28.3679	28.5289	28.4988	28.204
FLA12_ARATH	sp|Q8LEE9|FLA12_ARATH Fasciclin-like arabinogalactan protein 12 OS=Arabidopsis thaliana OX=3702 GN=FLA12 PE=2 SV=2	FLA12	26367	2	18.88	1	0.142766	0.595524	23.0296	23.7295	22.8252	23.4315	23.1966	23.3844
A0A178U9L2_ARATH	tr|A0A178U9L2|A0A178U9L2_ARATH Uncharacterized protein OS=Arabidopsis thaliana OX=3702 GN=AXX17_At5g58020 PE=4 SV=1	AXX17_At5g58020	24998	3	17.11	3	0.142662	0.574846	23.1642	22.9235	23.7998	23.3827	23.5194	23.4133
PSAO_ARATH	sp|Q949Q5|PSAO_ARATH Photosystem I subunit O OS=Arabidopsis thaliana OX=3702 GN=PSAO PE=1 SV=1	PSAO	15144	3	20.71	3	0.142602	0.512751	25.7504	26.3388	26.3448	26.4432	26.1242	26.2945
CRK10_ARATH	sp|Q8GYA4|CRK10_ARATH Cysteine-rich receptor-like protein kinase 10 OS=Arabidopsis thaliana OX=3702 GN=CRK10 PE=1 SV=3	CRK10	74283	17	29.75	17	0.14226	0.325175	26.1096	26.4246	26.4342	26.4158	26.5249	26.4545
RS32_ARATH	sp|Q9M339|RS32_ARATH 40S ribosomal protein S3-2 OS=Arabidopsis thaliana OX=3702 GN=RPS3B PE=1 SV=1	RPS3B	27349	38	87.95	35	0.14216	0.248817	29.7802	29.5886	29.6505	29.7701	29.8978	29.7778
RICE2_ARATH	sp|Q9FNG3|RICE2_ARATH Protein RISC-INTERACTING CLEARING 3'-5' EXORIBONUCLEASE 2 OS=Arabidopsis thaliana OX=3702 GN=RICE2 PE=1 SV=1	RICE2	23215	4	29.61	3	0.14201	0.788291	23.1769	21.1792	22.1372	22.1509	22.594	22.1745
DTC_ARATH	sp|Q9C5M0|DTC_ARATH Mitochondrial dicarboxylate/tricarboxylate transporter DTC OS=Arabidopsis thaliana OX=3702 GN=DTC PE=1 SV=1	DTC	31912	31	88.59	27	0.141919	0.225479	29.2733	29.2101	29.1172	29.3199	29.3049	29.4016
GNL1_ARATH	sp|Q9FLY5|GNL1_ARATH ARF guanine-nucleotide exchange factor GNL1 OS=Arabidopsis thaliana OX=3702 GN=GNL1 PE=3 SV=1	GNL1	161954	9	10.6	4	0.141703	0.719402	24.6586	23.3592	23.5655	23.673	24.1468	24.1886
R10A2_ARATH	sp|P59230|R10A2_ARATH 60S ribosomal protein L10a-2 OS=Arabidopsis thaliana OX=3702 GN=RPL10AB PE=1 SV=1	RPL10AB	24425	22	61.57	22	0.141225	0.228255	28.6067	28.6311	28.6516	28.6924	28.8729	28.7478
PSB4_ARATH	sp|Q7DLR9|PSB4_ARATH Proteasome subunit beta type-4 OS=Arabidopsis thaliana OX=3702 GN=PBG1 PE=1 SV=2	PBG1	27651	12	72.36	11	0.141147	0.355578	27.3378	27.4876	27.7198	27.5451	27.6868	27.7366
ECA1_ARATH	sp|P92939|ECA1_ARATH Calcium-transporting ATPase 1, endoplasmic reticulum-type OS=Arabidopsis thaliana OX=3702 GN=ECA1 PE=1 SV=2	ECA1	116366	20	20.55	1	0.141092	0.598333	21.6357	21.678	21.0126	21.6916	21.2281	21.8299
NDUS4_ARATH	sp|Q9FJW4|NDUS4_ARATH NADH dehydrogenase [ubiquinone] iron-sulfur protein 4, mitochondrial OS=Arabidopsis thaliana OX=3702 GN=FRO1 PE=1 SV=1	FRO1	17134	8	52.6	7	0.141091	0.215912	26.0275	25.9158	25.9843	26.1706	26.119	26.0613
AARE_ARATH	sp|Q84LM4|AARE_ARATH Acylamino-acid-releasing enzyme OS=Arabidopsis thaliana OX=3702 GN=AARE PE=1 SV=1	AARE	83938	24	45.55	21	0.140825	0.290169	26.443	26.4983	26.7045	26.777	26.6391	26.6521
A0A7G2E4J1_ARATH	tr|A0A7G2E4J1|A0A7G2E4J1_ARATH Protein-lysine N-methyltransferase AT9943_LOCUS4789 OS=Arabidopsis thaliana OX=3702 GN=AT9943_LOCUS4789 PE=3 SV=1	AT9943_LOCUS4789	68154	15	36.6	15	0.140287	0.30782	26.0225	26.0189	25.8123	26.0666	26.2249	25.983
H2A1_ARATH	sp|Q9C681|H2A1_ARATH Probable histone H2A.1 OS=Arabidopsis thaliana OX=3702 GN=At1g51060 PE=1 SV=1	At1g51060	13934	5	34.85	1	0.140166	0.707003	21.1553	22.0025	22.4265	22.2458	21.6775	22.0816
NB5R2_ARATH	sp|P83291|NB5R2_ARATH NADH-cytochrome b5 reductase-like protein OS=Arabidopsis thaliana OX=3702 GN=CBR2 PE=1 SV=2	CBR2	35987	21	67.38	19	0.139504	0.347967	27.8325	27.902	28.1102	28.2338	27.9423	28.087
A0A7G2EP35_ARATH	tr|A0A7G2EP35|A0A7G2EP35_ARATH Serine/threonine-protein phosphatase OS=Arabidopsis thaliana OX=3702 GN=AT9943_LOCUS11533 PE=3 SV=1	AT9943_LOCUS11533	130379	30	36.7	18	0.139266	0.539479	26.666	26.8784	27.1146	27.3143	27.0947	26.6678
F10AL_ARATH	sp|Q93YR3|F10AL_ARATH FAM10 family protein At4g22670 OS=Arabidopsis thaliana OX=3702 GN=At4g22670 PE=1 SV=1	At4g22670	46621	18	39.91	17	0.139211	0.456107	26.7494	26.4993	26.6002	26.8566	26.9681	26.4419
VPS45_ARATH	sp|O49048|VPS45_ARATH Vacuolar protein sorting-associated protein 45 homolog OS=Arabidopsis thaliana OX=3702 GN=VPS45 PE=1 SV=2	VPS45	64942	8	16.87	8	0.138954	0.707988	22.9538	23.9923	23.4672	23.6394	24.0736	23.1172
R23A1_ARATH	sp|Q8LD46|R23A1_ARATH 60S ribosomal protein L23a-1 OS=Arabidopsis thaliana OX=3702 GN=RPL23AA PE=2 SV=2	RPL23AA	17441	15	47.4	15	0.138507	0.269617	28.4604	28.4533	28.385	28.4975	28.7149	28.5018
Y5224_ARATH	sp|Q94EG6|Y5224_ARATH Uncharacterized protein At5g02240 OS=Arabidopsis thaliana OX=3702 GN=At5g02240 PE=1 SV=1	At5g02240	27103	17	63.24	16	0.138401	0.290869	27.5271	27.2671	27.5098	27.6098	27.5287	27.5807
A0A178UED6_ARATH	tr|A0A178UED6|A0A178UED6_ARATH Translocon-associated protein subunit beta OS=Arabidopsis thaliana OX=3702 GN=At5g14030 PE=3 SV=1	At5g14030	21105	5	41.54	5	0.138373	0.461056	26.5166	26.3641	26.0422	26.2522	26.4571	26.6287
KAI2_ARATH	sp|Q9SZU7|KAI2_ARATH Probable esterase KAI2 OS=Arabidopsis thaliana OX=3702 GN=KAI2 PE=1 SV=1	KAI2	29791	5	26.3	4	0.138101	0.788776	23.0667	21.8318	23.3056	22.214	22.9687	23.4356
A0A5S9WS98_ARATH	tr|A0A5S9WS98|A0A5S9WS98_ARATH Uncharacterized protein OS=Arabidopsis thaliana OX=3702 GN=C24_LOCUS4726 PE=4 SV=1	C24_LOCUS4726	46382	39	73.61	2	0.13799	0.456721	27.4089	27.7832	27.3406	27.7928	27.4411	27.7129
RL81_ARATH	sp|P46286|RL81_ARATH 60S ribosomal protein L8-1 OS=Arabidopsis thaliana OX=3702 GN=RPL8A PE=1 SV=2	RPL8A	27859	22	57.36	21	0.137484	0.288337	29.1982	29.406	29.4276	29.5051	29.3999	29.5393
A0A178V984_ARATH	tr|A0A178V984|A0A178V984_ARATH (thale cress) hypothetical protein OS=Arabidopsis thaliana OX=3702 GN=AXX17_At3g57810 PE=4 SV=1	AXX17_At3g57810	24951	14	56.77	12	0.137321	0.293952	26.4573	26.5547	26.5394	26.6374	26.5223	26.8036
[truncated: 2,500 more rows]
